# Supplementary material for: Human dimensions of wildfires in NW Spain: causes, value of the burned vegetation and administrative measures
Source: PeerJ. 2018 Sep 26;6:e5657. doi: 10.7717/peerj.5657 (PMC6163030; doi:10.7717/peerj.5657)
Supplement: Supplemental Information 2 — Data corresponding to the answers of the respondents to the questionnaire. [file peerj-06-5657-s002.xlsx]

## Sheet: Question 1
Survey Number	Age	SEX	ReYesdence	Outdoor Activities	Educational level	Cause	Score
1	MiddleAged	Woman	Urban	No	Medium	1.Accident	2
1	MiddleAged	Woman	Urban	No	Medium	1.Deliberate	4
1	MiddleAged	Woman	Urban	No	Medium	1.Natural	1
1	MiddleAged	Woman	Urban	No	Medium	1.Negligen	3
2	Senior	Woman	Rural	Yes	Low	1.Accident	2
2	Senior	Woman	Rural	Yes	Low	1.Deliberate	3
2	Senior	Woman	Rural	Yes	Low	1.Natural	1
2	Senior	Woman	Rural	Yes	Low	1.Negligen	4
3	MiddleAged	Man	Urban	Yes	Medium	1.Accident	2
3	MiddleAged	Man	Urban	Yes	Medium	1.Deliberate	4
3	MiddleAged	Man	Urban	Yes	Medium	1.Natural	1
3	MiddleAged	Man	Urban	Yes	Medium	1.Negligen	3
4	MiddleAged	Man	Rural	Yes	High	1.Accident	2
4	MiddleAged	Man	Rural	Yes	High	1.Deliberate	3
4	MiddleAged	Man	Rural	Yes	High	1.Natural	1
4	MiddleAged	Man	Rural	Yes	High	1.Negligen	4
5	Senior	Woman	Rural	No	Low	1.Accident	2
5	Senior	Woman	Rural	No	Low	1.Deliberate	3
5	Senior	Woman	Rural	No	Low	1.Natural	1
5	Senior	Woman	Rural	No	Low	1.Negligen	4
6	Young	Woman	Urban	Yes	Medium	1.Accident	2
6	Young	Woman	Urban	Yes	Medium	1.Deliberate	4
6	Young	Woman	Urban	Yes	Medium	1.Natural	1
6	Young	Woman	Urban	Yes	Medium	1.Negligen	3
7	Senior	Woman	Rural	No	Low	1.Accident	2
7	Senior	Woman	Rural	No	Low	1.Deliberate	3
7	Senior	Woman	Rural	No	Low	1.Natural	1
7	Senior	Woman	Rural	No	Low	1.Negligen	4
8	Senior	Man	Urban	No	Low	1.Accident	2
8	Senior	Man	Urban	No	Low	1.Deliberate	3
8	Senior	Man	Urban	No	Low	1.Natural	1
8	Senior	Man	Urban	No	Low	1.Negligen	4
9	Young	Woman	Urban	Yes	Medium	1.Accident	2
9	Young	Woman	Urban	Yes	Medium	1.Deliberate	4
9	Young	Woman	Urban	Yes	Medium	1.Natural	1
9	Young	Woman	Urban	Yes	Medium	1.Negligen	3
10	Young	Man	Urban	Yes	High	1.Accident	2
10	Young	Man	Urban	Yes	High	1.Deliberate	4
10	Young	Man	Urban	Yes	High	1.Natural	1
10	Young	Man	Urban	Yes	High	1.Negligen	3
11	MiddleAged	Man	Urban	Yes	Medium	1.Accident	2
11	MiddleAged	Man	Urban	Yes	Medium	1.Deliberate	4
11	MiddleAged	Man	Urban	Yes	Medium	1.Natural	1
11	MiddleAged	Man	Urban	Yes	Medium	1.Negligen	3
12	Senior	Man	Rural	Yes	Low	1.Accident	2
12	Senior	Man	Rural	Yes	Low	1.Deliberate	4
12	Senior	Man	Rural	Yes	Low	1.Natural	1
12	Senior	Man	Rural	Yes	Low	1.Negligen	3
13	Senior	Woman	Rural	Yes	Low	1.Accident	2
13	Senior	Woman	Rural	Yes	Low	1.Deliberate	4
13	Senior	Woman	Rural	Yes	Low	1.Natural	1
13	Senior	Woman	Rural	Yes	Low	1.Negligen	3
14	MiddleAged	Woman	Urban	Yes	Medium	1.Accident	2
14	MiddleAged	Woman	Urban	Yes	Medium	1.Deliberate	4
14	MiddleAged	Woman	Urban	Yes	Medium	1.Natural	1
14	MiddleAged	Woman	Urban	Yes	Medium	1.Negligen	3
15	MiddleAged	Woman	Urban	Yes	Medium	1.Accident	2
15	MiddleAged	Woman	Urban	Yes	Medium	1.Deliberate	4
15	MiddleAged	Woman	Urban	Yes	Medium	1.Natural	1
15	MiddleAged	Woman	Urban	Yes	Medium	1.Negligen	3
16	Young	Woman	Urban	Yes	High	1.Accident	2
16	Young	Woman	Urban	Yes	High	1.Deliberate	3
16	Young	Woman	Urban	Yes	High	1.Natural	1
16	Young	Woman	Urban	Yes	High	1.Negligen	4
17	Senior	Woman	Rural	No	Medium	1.Accident	2
17	Senior	Woman	Rural	No	Medium	1.Deliberate	4
17	Senior	Woman	Rural	No	Medium	1.Natural	1
17	Senior	Woman	Rural	No	Medium	1.Negligen	3
18	Young	Man	Urban	Yes	Medium	1.Accident	2
18	Young	Man	Urban	Yes	Medium	1.Deliberate	4
18	Young	Man	Urban	Yes	Medium	1.Natural	1
18	Young	Man	Urban	Yes	Medium	1.Negligen	3
19	Young	Woman	Rural	Yes	High	1.Accident	2
19	Young	Woman	Rural	Yes	High	1.Deliberate	4
19	Young	Woman	Rural	Yes	High	1.Natural	1
19	Young	Woman	Rural	Yes	High	1.Negligen	3
20	MiddleAged	Woman	Urban	No	Medium	1.Accident	2
20	MiddleAged	Woman	Urban	No	Medium	1.Deliberate	4
20	MiddleAged	Woman	Urban	No	Medium	1.Natural	1
20	MiddleAged	Woman	Urban	No	Medium	1.Negligen	3
21	MiddleAged	Man	Urban	No	High	1.Accident	2
21	MiddleAged	Man	Urban	No	High	1.Deliberate	3
21	MiddleAged	Man	Urban	No	High	1.Natural	1
21	MiddleAged	Man	Urban	No	High	1.Negligen	4
22	Senior	Man	Urban	No	Low	1.Accident	2
22	Senior	Man	Urban	No	Low	1.Deliberate	3
22	Senior	Man	Urban	No	Low	1.Natural	1
22	Senior	Man	Urban	No	Low	1.Negligen	4
23	MiddleAged	Man	Urban	Yes	Medium	1.Accident	2
23	MiddleAged	Man	Urban	Yes	Medium	1.Deliberate	3
23	MiddleAged	Man	Urban	Yes	Medium	1.Natural	1
23	MiddleAged	Man	Urban	Yes	Medium	1.Negligen	4
24	MiddleAged	Woman	Urban	Yes	Medium	1.Accident	2
24	MiddleAged	Woman	Urban	Yes	Medium	1.Deliberate	4
24	MiddleAged	Woman	Urban	Yes	Medium	1.Natural	1
24	MiddleAged	Woman	Urban	Yes	Medium	1.Negligen	3
25	MiddleAged	Man	Urban	No	Medium	1.Accident	2
25	MiddleAged	Man	Urban	No	Medium	1.Deliberate	4
25	MiddleAged	Man	Urban	No	Medium	1.Natural	1
25	MiddleAged	Man	Urban	No	Medium	1.Negligen	3
26	MiddleAged	Woman	Urban	No	Low	1.Accident	2
26	MiddleAged	Woman	Urban	No	Low	1.Deliberate	4
26	MiddleAged	Woman	Urban	No	Low	1.Natural	1
26	MiddleAged	Woman	Urban	No	Low	1.Negligen	3
27	Young	Man	Urban	Yes	High	1.Accident	2
27	Young	Man	Urban	Yes	High	1.Deliberate	4
27	Young	Man	Urban	Yes	High	1.Natural	1
27	Young	Man	Urban	Yes	High	1.Negligen	3
28	Young	Man	Rural	Yes	Medium	1.Accident	2
28	Young	Man	Rural	Yes	Medium	1.Deliberate	4
28	Young	Man	Rural	Yes	Medium	1.Natural	1
28	Young	Man	Rural	Yes	Medium	1.Negligen	3
29	Young	Woman	Rural	Yes	High	1.Accident	2
29	Young	Woman	Rural	Yes	High	1.Deliberate	4
29	Young	Woman	Rural	Yes	High	1.Natural	1
29	Young	Woman	Rural	Yes	High	1.Negligen	3
30	Senior	Woman	Urban	No	Low	1.Accident	2
30	Senior	Woman	Urban	No	Low	1.Deliberate	3
30	Senior	Woman	Urban	No	Low	1.Natural	1
30	Senior	Woman	Urban	No	Low	1.Negligen	4
31	MiddleAged	Woman	Urban	No	Medium	1.Accident	2
31	MiddleAged	Woman	Urban	No	Medium	1.Deliberate	4
31	MiddleAged	Woman	Urban	No	Medium	1.Natural	1
31	MiddleAged	Woman	Urban	No	Medium	1.Negligen	3
32	Senior	Woman	Rural	No	Medium	1.Accident	1
32	Senior	Woman	Rural	No	Medium	1.Deliberate	4
32	Senior	Woman	Rural	No	Medium	1.Natural	2
32	Senior	Woman	Rural	No	Medium	1.Negligen	3
33	Senior	Man	Rural	No	Low	1.Accident	1
33	Senior	Man	Rural	No	Low	1.Deliberate	4
33	Senior	Man	Rural	No	Low	1.Natural	2
33	Senior	Man	Rural	No	Low	1.Negligen	3
34	Senior	Man	Rural	Yes	Low	1.Accident	2
34	Senior	Man	Rural	Yes	Low	1.Deliberate	4
34	Senior	Man	Rural	Yes	Low	1.Natural	1
34	Senior	Man	Rural	Yes	Low	1.Negligen	3
35	MiddleAged	Woman	Urban	Yes	Medium	1.Accident	2
35	MiddleAged	Woman	Urban	Yes	Medium	1.Deliberate	4
35	MiddleAged	Woman	Urban	Yes	Medium	1.Natural	1
35	MiddleAged	Woman	Urban	Yes	Medium	1.Negligen	3
36	MiddleAged	Woman	Urban	Yes	Medium	1.Accident	2
36	MiddleAged	Woman	Urban	Yes	Medium	1.Deliberate	4
36	MiddleAged	Woman	Urban	Yes	Medium	1.Natural	1
36	MiddleAged	Woman	Urban	Yes	Medium	1.Negligen	3
37	MiddleAged	Man	Urban	No	Medium	1.Accident	2
37	MiddleAged	Man	Urban	No	Medium	1.Deliberate	3
37	MiddleAged	Man	Urban	No	Medium	1.Natural	1
37	MiddleAged	Man	Urban	No	Medium	1.Negligen	4
38	Young	Woman	Urban	Yes	High	1.Accident	2
38	Young	Woman	Urban	Yes	High	1.Deliberate	4
38	Young	Woman	Urban	Yes	High	1.Natural	1
38	Young	Woman	Urban	Yes	High	1.Negligen	3
39	MiddleAged	Man	Rural	No	Medium	1.Accident	2
39	MiddleAged	Man	Rural	No	Medium	1.Deliberate	4
39	MiddleAged	Man	Rural	No	Medium	1.Natural	1
39	MiddleAged	Man	Rural	No	Medium	1.Negligen	3
40	Young	Woman	Urban	Yes	High	1.Accident	2
40	Young	Woman	Urban	Yes	High	1.Deliberate	4
40	Young	Woman	Urban	Yes	High	1.Natural	1
40	Young	Woman	Urban	Yes	High	1.Negligen	3
41	Young	Woman	Urban	Yes	High	1.Accident	2
41	Young	Woman	Urban	Yes	High	1.Deliberate	3
41	Young	Woman	Urban	Yes	High	1.Natural	1
41	Young	Woman	Urban	Yes	High	1.Negligen	4
42	MiddleAged	Man	Urban	Yes	Medium	1.Accident	3
42	MiddleAged	Man	Urban	Yes	Medium	1.Deliberate	4
42	MiddleAged	Man	Urban	Yes	Medium	1.Natural	1
42	MiddleAged	Man	Urban	Yes	Medium	1.Negligen	2
43	MiddleAged	Man	Rural	No	Medium	1.Accident	2
43	MiddleAged	Man	Rural	No	Medium	1.Deliberate	3
43	MiddleAged	Man	Rural	No	Medium	1.Natural	1
43	MiddleAged	Man	Rural	No	Medium	1.Negligen	4
44	Senior	Woman	Rural	Yes	Low	1.Accident	2
44	Senior	Woman	Rural	Yes	Low	1.Deliberate	3
44	Senior	Woman	Rural	Yes	Low	1.Natural	1
44	Senior	Woman	Rural	Yes	Low	1.Negligen	4
45	MiddleAged	Woman	Urban	Yes	Low	1.Accident	2
45	MiddleAged	Woman	Urban	Yes	Low	1.Deliberate	4
45	MiddleAged	Woman	Urban	Yes	Low	1.Natural	1
45	MiddleAged	Woman	Urban	Yes	Low	1.Negligen	3
46	MiddleAged	Woman	Urban	Yes	Medium	1.Accident	1
46	MiddleAged	Woman	Urban	Yes	Medium	1.Deliberate	4
46	MiddleAged	Woman	Urban	Yes	Medium	1.Natural	2
46	MiddleAged	Woman	Urban	Yes	Medium	1.Negligen	3
47	Young	Man	Urban	Yes	Medium	1.Accident	2
47	Young	Man	Urban	Yes	Medium	1.Deliberate	3
47	Young	Man	Urban	Yes	Medium	1.Natural	1
47	Young	Man	Urban	Yes	Medium	1.Negligen	4
48	MiddleAged	Man	Rural	No	Medium	1.Accident	3
48	MiddleAged	Man	Rural	No	Medium	1.Deliberate	2
48	MiddleAged	Man	Rural	No	Medium	1.Natural	1
48	MiddleAged	Man	Rural	No	Medium	1.Negligen	4
49	Senior	Woman	Urban	No	Medium	1.Accident	2
49	Senior	Woman	Urban	No	Medium	1.Deliberate	4
49	Senior	Woman	Urban	No	Medium	1.Natural	1
49	Senior	Woman	Urban	No	Medium	1.Negligen	3
50	Senior	Woman	Rural	No	Low	1.Accident	2
50	Senior	Woman	Rural	No	Low	1.Deliberate	3
50	Senior	Woman	Rural	No	Low	1.Natural	1
50	Senior	Woman	Rural	No	Low	1.Negligen	4
51	Senior	Man	Rural	No	Low	1.Accident	2
51	Senior	Man	Rural	No	Low	1.Deliberate	4
51	Senior	Man	Rural	No	Low	1.Natural	1
51	Senior	Man	Rural	No	Low	1.Negligen	3
52	Senior	Woman	Rural	No	Low	1.Accident	2
52	Senior	Woman	Rural	No	Low	1.Deliberate	3
52	Senior	Woman	Rural	No	Low	1.Natural	1
52	Senior	Woman	Rural	No	Low	1.Negligen	4
53	Senior	Woman	Rural	Yes	High	1.Accident	2
53	Senior	Woman	Rural	Yes	High	1.Deliberate	3
53	Senior	Woman	Rural	Yes	High	1.Natural	1
53	Senior	Woman	Rural	Yes	High	1.Negligen	4
54	MiddleAged	Woman	Urban	No	Medium	1.Accident	2
54	MiddleAged	Woman	Urban	No	Medium	1.Deliberate	3
54	MiddleAged	Woman	Urban	No	Medium	1.Natural	1
54	MiddleAged	Woman	Urban	No	Medium	1.Negligen	4
55	MiddleAged	Man	Urban	No	Medium	1.Accident	2
55	MiddleAged	Man	Urban	No	Medium	1.Deliberate	4
55	MiddleAged	Man	Urban	No	Medium	1.Natural	1
55	MiddleAged	Man	Urban	No	Medium	1.Negligen	3
56	Young	Man	Rural	Yes	High	1.Accident	2
56	Young	Man	Rural	Yes	High	1.Deliberate	4
56	Young	Man	Rural	Yes	High	1.Natural	1
56	Young	Man	Rural	Yes	High	1.Negligen	3
57	MiddleAged	Man	Rural	No	Medium	1.Accident	2
57	MiddleAged	Man	Rural	No	Medium	1.Deliberate	4
57	MiddleAged	Man	Rural	No	Medium	1.Natural	1
57	MiddleAged	Man	Rural	No	Medium	1.Negligen	3
58	MiddleAged	Woman	Urban	Yes	Low	1.Accident	2
58	MiddleAged	Woman	Urban	Yes	Low	1.Deliberate	4
58	MiddleAged	Woman	Urban	Yes	Low	1.Natural	1
58	MiddleAged	Woman	Urban	Yes	Low	1.Negligen	3
59	Senior	Woman	Urban	No	Low	1.Accident	2
59	Senior	Woman	Urban	No	Low	1.Deliberate	3
59	Senior	Woman	Urban	No	Low	1.Natural	1
59	Senior	Woman	Urban	No	Low	1.Negligen	4
60	Senior	Woman	Urban	No	Medium	1.Accident	2
60	Senior	Woman	Urban	No	Medium	1.Deliberate	3
60	Senior	Woman	Urban	No	Medium	1.Natural	1
60	Senior	Woman	Urban	No	Medium	1.Negligen	4
61	Senior	Man	Urban	No	Low	1.Accident	2
61	Senior	Man	Urban	No	Low	1.Deliberate	4
61	Senior	Man	Urban	No	Low	1.Natural	1
61	Senior	Man	Urban	No	Low	1.Negligen	3
62	Senior	Man	Rural	No	Low	1.Accident	2
62	Senior	Man	Rural	No	Low	1.Deliberate	4
62	Senior	Man	Rural	No	Low	1.Natural	1
62	Senior	Man	Rural	No	Low	1.Negligen	3
63	MiddleAged	Man	Urban	Yes	High	1.Accident	2
63	MiddleAged	Man	Urban	Yes	High	1.Deliberate	4
63	MiddleAged	Man	Urban	Yes	High	1.Natural	1
63	MiddleAged	Man	Urban	Yes	High	1.Negligen	3
64	MiddleAged	Woman	Rural	Yes	Medium	1.Accident	4
64	MiddleAged	Woman	Rural	Yes	Medium	1.Deliberate	1
64	MiddleAged	Woman	Rural	Yes	Medium	1.Natural	2
64	MiddleAged	Woman	Rural	Yes	Medium	1.Negligen	3
65	MiddleAged	Woman	Urban	No	Medium	1.Accident	4
65	MiddleAged	Woman	Urban	No	Medium	1.Deliberate	1
65	MiddleAged	Woman	Urban	No	Medium	1.Natural	2
65	MiddleAged	Woman	Urban	No	Medium	1.Negligen	3
66	MiddleAged	Woman	Urban	No	High	1.Accident	2
66	MiddleAged	Woman	Urban	No	High	1.Deliberate	4
66	MiddleAged	Woman	Urban	No	High	1.Natural	1
66	MiddleAged	Woman	Urban	No	High	1.Negligen	3
67	MiddleAged	Man	Urban	Yes	Low	1.Accident	2
67	MiddleAged	Man	Urban	Yes	Low	1.Deliberate	3
67	MiddleAged	Man	Urban	Yes	Low	1.Natural	1
67	MiddleAged	Man	Urban	Yes	Low	1.Negligen	4
68	MiddleAged	Woman	Urban	No	Medium	1.Accident	2
68	MiddleAged	Woman	Urban	No	Medium	1.Deliberate	4
68	MiddleAged	Woman	Urban	No	Medium	1.Natural	1
68	MiddleAged	Woman	Urban	No	Medium	1.Negligen	3
69	MiddleAged	Woman	Rural	Yes	Low	1.Accident	2
69	MiddleAged	Woman	Rural	Yes	Low	1.Deliberate	3
69	MiddleAged	Woman	Rural	Yes	Low	1.Natural	1
69	MiddleAged	Woman	Rural	Yes	Low	1.Negligen	4
70	MiddleAged	Woman	Urban	No	Medium	1.Accident	2
70	MiddleAged	Woman	Urban	No	Medium	1.Deliberate	4
70	MiddleAged	Woman	Urban	No	Medium	1.Natural	1
70	MiddleAged	Woman	Urban	No	Medium	1.Negligen	3
71	Senior	Man	Urban	No	Low	1.Accident	4
71	Senior	Man	Urban	No	Low	1.Deliberate	2
71	Senior	Man	Urban	No	Low	1.Natural	1
71	Senior	Man	Urban	No	Low	1.Negligen	3
72	Young	Man	Urban	No	High	1.Accident	2
72	Young	Man	Urban	No	High	1.Deliberate	4
72	Young	Man	Urban	No	High	1.Natural	1
72	Young	Man	Urban	No	High	1.Negligen	3
73	MiddleAged	Man	Urban	Yes	Medium	1.Accident	3
73	MiddleAged	Man	Urban	Yes	Medium	1.Deliberate	1
73	MiddleAged	Man	Urban	Yes	Medium	1.Natural	2
73	MiddleAged	Man	Urban	Yes	Medium	1.Negligen	4
74	MiddleAged	Woman	Urban	Yes	Medium	1.Accident	2
74	MiddleAged	Woman	Urban	Yes	Medium	1.Deliberate	4
74	MiddleAged	Woman	Urban	Yes	Medium	1.Natural	1
74	MiddleAged	Woman	Urban	Yes	Medium	1.Negligen	3
75	Young	Woman	Urban	No	Medium	1.Accident	2
75	Young	Woman	Urban	No	Medium	1.Deliberate	4
75	Young	Woman	Urban	No	Medium	1.Natural	1
75	Young	Woman	Urban	No	Medium	1.Negligen	3
76	MiddleAged	Woman	Urban	No	Medium	1.Accident	2
76	MiddleAged	Woman	Urban	No	Medium	1.Deliberate	4
76	MiddleAged	Woman	Urban	No	Medium	1.Natural	1
76	MiddleAged	Woman	Urban	No	Medium	1.Negligen	3
77	Senior	Man	Rural	Yes	Low	1.Accident	3
77	Senior	Man	Rural	Yes	Low	1.Deliberate	2
77	Senior	Man	Rural	Yes	Low	1.Natural	1
77	Senior	Man	Rural	Yes	Low	1.Negligen	4
78	MiddleAged	Woman	Urban	No	Medium	1.Accident	3
78	MiddleAged	Woman	Urban	No	Medium	1.Deliberate	4
78	MiddleAged	Woman	Urban	No	Medium	1.Natural	1
78	MiddleAged	Woman	Urban	No	Medium	1.Negligen	2
79	MiddleAged	Man	Urban	No	Medium	1.Accident	2
79	MiddleAged	Man	Urban	No	Medium	1.Deliberate	4
79	MiddleAged	Man	Urban	No	Medium	1.Natural	1
79	MiddleAged	Man	Urban	No	Medium	1.Negligen	3
80	Senior	Woman	Rural	Yes	Low	1.Accident	1
80	Senior	Woman	Rural	Yes	Low	1.Deliberate	3
80	Senior	Woman	Rural	Yes	Low	1.Natural	2
80	Senior	Woman	Rural	Yes	Low	1.Negligen	4
81	MiddleAged	Man	Urban	No	Low	1.Accident	3
81	MiddleAged	Man	Urban	No	Low	1.Deliberate	4
81	MiddleAged	Man	Urban	No	Low	1.Natural	1
81	MiddleAged	Man	Urban	No	Low	1.Negligen	2
82	MiddleAged	Man	Urban	Yes	Medium	1.Accident	2
82	MiddleAged	Man	Urban	Yes	Medium	1.Deliberate	4
82	MiddleAged	Man	Urban	Yes	Medium	1.Natural	1
82	MiddleAged	Man	Urban	Yes	Medium	1.Negligen	3
83	Young	Woman	Urban	Yes	High	1.Accident	3
83	Young	Woman	Urban	Yes	High	1.Deliberate	2
83	Young	Woman	Urban	Yes	High	1.Natural	1
83	Young	Woman	Urban	Yes	High	1.Negligen	4
84	Senior	Man	Urban	No	Medium	1.Accident	3
84	Senior	Man	Urban	No	Medium	1.Deliberate	2
84	Senior	Man	Urban	No	Medium	1.Natural	4
84	Senior	Man	Urban	No	Medium	1.Negligen	1
85	Young	Woman	Urban	Yes	High	1.Accident	2
85	Young	Woman	Urban	Yes	High	1.Deliberate	3
85	Young	Woman	Urban	Yes	High	1.Natural	1
85	Young	Woman	Urban	Yes	High	1.Negligen	4
86	Senior	Man	Urban	No	High	1.Accident	4
86	Senior	Man	Urban	No	High	1.Deliberate	2
86	Senior	Man	Urban	No	High	1.Natural	1
86	Senior	Man	Urban	No	High	1.Negligen	3
87	Senior	Man	Rural	No	Low	1.Accident	2
87	Senior	Man	Rural	No	Low	1.Deliberate	4
87	Senior	Man	Rural	No	Low	1.Natural	1
87	Senior	Man	Rural	No	Low	1.Negligen	3
88	MiddleAged	Woman	Urban	Yes	High	1.Accident	2
88	MiddleAged	Woman	Urban	Yes	High	1.Deliberate	4
88	MiddleAged	Woman	Urban	Yes	High	1.Natural	1
88	MiddleAged	Woman	Urban	Yes	High	1.Negligen	3
89	Young	Woman	Rural	No	Medium	1.Accident	2
89	Young	Woman	Rural	No	Medium	1.Deliberate	4
89	Young	Woman	Rural	No	Medium	1.Natural	1
89	Young	Woman	Rural	No	Medium	1.Negligen	3
90	MiddleAged	Woman	Urban	No	Medium	1.Accident	2
90	MiddleAged	Woman	Urban	No	Medium	1.Deliberate	3
90	MiddleAged	Woman	Urban	No	Medium	1.Natural	1
90	MiddleAged	Woman	Urban	No	Medium	1.Negligen	4
91	Senior	Man	Urban	No	Low	1.Accident	2
91	Senior	Man	Urban	No	Low	1.Deliberate	3
91	Senior	Man	Urban	No	Low	1.Natural	1
91	Senior	Man	Urban	No	Low	1.Negligen	4
92	MiddleAged	Man	Urban	Yes	Medium	1.Accident	2
92	MiddleAged	Man	Urban	Yes	Medium	1.Deliberate	4
92	MiddleAged	Man	Urban	Yes	Medium	1.Natural	1
92	MiddleAged	Man	Urban	Yes	Medium	1.Negligen	3
93	Senior	Woman	Rural	Yes	Low	1.Accident	2
93	Senior	Woman	Rural	Yes	Low	1.Deliberate	4
93	Senior	Woman	Rural	Yes	Low	1.Natural	1
93	Senior	Woman	Rural	Yes	Low	1.Negligen	3
94	MiddleAged	Man	Urban	No	Low	1.Accident	2
94	MiddleAged	Man	Urban	No	Low	1.Deliberate	4
94	MiddleAged	Man	Urban	No	Low	1.Natural	1
94	MiddleAged	Man	Urban	No	Low	1.Negligen	3
95	Young	Woman	Urban	No	Medium	1.Accident	2
95	Young	Woman	Urban	No	Medium	1.Deliberate	4
95	Young	Woman	Urban	No	Medium	1.Natural	1
95	Young	Woman	Urban	No	Medium	1.Negligen	3
96	MiddleAged	Woman	Urban	No	Medium	1.Accident	2
96	MiddleAged	Woman	Urban	No	Medium	1.Deliberate	3
96	MiddleAged	Woman	Urban	No	Medium	1.Natural	1
96	MiddleAged	Woman	Urban	No	Medium	1.Negligen	4
97	Young	Woman	Urban	Yes	High	1.Accident	2
97	Young	Woman	Urban	Yes	High	1.Deliberate	4
97	Young	Woman	Urban	Yes	High	1.Natural	1
97	Young	Woman	Urban	Yes	High	1.Negligen	3
98	Young	Man	Urban	No	Medium	1.Accident	2
98	Young	Man	Urban	No	Medium	1.Deliberate	3
98	Young	Man	Urban	No	Medium	1.Natural	1
98	Young	Man	Urban	No	Medium	1.Negligen	4
99	Senior	Man	Urban	No	Low	1.Accident	2
99	Senior	Man	Urban	No	Low	1.Deliberate	4
99	Senior	Man	Urban	No	Low	1.Natural	1
99	Senior	Man	Urban	No	Low	1.Negligen	3
100	MiddleAged	Man	Urban	No	Medium	1.Accident	2
100	MiddleAged	Man	Urban	No	Medium	1.Deliberate	3
100	MiddleAged	Man	Urban	No	Medium	1.Natural	1
100	MiddleAged	Man	Urban	No	Medium	1.Negligen	4
101	Senior	Man	Rural	No	Medium	1.Accident	2
101	Senior	Man	Rural	No	Medium	1.Deliberate	4
101	Senior	Man	Rural	No	Medium	1.Natural	1
101	Senior	Man	Rural	No	Medium	1.Negligen	3
102	Senior	Woman	Urban	Yes	Medium	1.Accident	2
102	Senior	Woman	Urban	Yes	Medium	1.Deliberate	4
102	Senior	Woman	Urban	Yes	Medium	1.Natural	1
102	Senior	Woman	Urban	Yes	Medium	1.Negligen	3
103	Young	Woman	Urban	Yes	Medium	1.Accident	2
103	Young	Woman	Urban	Yes	Medium	1.Deliberate	3
103	Young	Woman	Urban	Yes	Medium	1.Natural	1
103	Young	Woman	Urban	Yes	Medium	1.Negligen	4
104	MiddleAged	Man	Urban	Yes	High	1.Accident	2
104	MiddleAged	Man	Urban	Yes	High	1.Deliberate	3
104	MiddleAged	Man	Urban	Yes	High	1.Natural	1
104	MiddleAged	Man	Urban	Yes	High	1.Negligen	4
105	Senior	Woman	Rural	Yes	Medium	1.Accident	1
105	Senior	Woman	Rural	Yes	Medium	1.Deliberate	4
105	Senior	Woman	Rural	Yes	Medium	1.Natural	2
105	Senior	Woman	Rural	Yes	Medium	1.Negligen	3
106	MiddleAged	Man	Urban	No	Medium	1.Accident	2
106	MiddleAged	Man	Urban	No	Medium	1.Deliberate	4
106	MiddleAged	Man	Urban	No	Medium	1.Natural	1
106	MiddleAged	Man	Urban	No	Medium	1.Negligen	3
107	MiddleAged	Man	Rural	Yes	High	1.Accident	2
107	MiddleAged	Man	Rural	Yes	High	1.Deliberate	4
107	MiddleAged	Man	Rural	Yes	High	1.Natural	1
107	MiddleAged	Man	Rural	Yes	High	1.Negligen	3
108	Young	Man	Urban	Yes	High	1.Accident	2
108	Young	Man	Urban	Yes	High	1.Deliberate	3
108	Young	Man	Urban	Yes	High	1.Natural	1
108	Young	Man	Urban	Yes	High	1.Negligen	4
109	Senior	Woman	Rural	Yes	Low	1.Accident	2
109	Senior	Woman	Rural	Yes	Low	1.Deliberate	3
109	Senior	Woman	Rural	Yes	Low	1.Natural	1
109	Senior	Woman	Rural	Yes	Low	1.Negligen	4
110	MiddleAged	Woman	Urban	Yes	High	1.Accident	2
110	MiddleAged	Woman	Urban	Yes	High	1.Deliberate	3
110	MiddleAged	Woman	Urban	Yes	High	1.Natural	1
110	MiddleAged	Woman	Urban	Yes	High	1.Negligen	4
111	MiddleAged	Woman	Rural	Yes	Medium	1.Accident	2
111	MiddleAged	Woman	Rural	Yes	Medium	1.Deliberate	4
111	MiddleAged	Woman	Rural	Yes	Medium	1.Natural	1
111	MiddleAged	Woman	Rural	Yes	Medium	1.Negligen	3
112	Senior	Man	Urban	No	Low	1.Accident	3
112	Senior	Man	Urban	No	Low	1.Deliberate	4
112	Senior	Man	Urban	No	Low	1.Natural	1
112	Senior	Man	Urban	No	Low	1.Negligen	2
113	Senior	Woman	Urban	No	Medium	1.Accident	2
113	Senior	Woman	Urban	No	Medium	1.Deliberate	4
113	Senior	Woman	Urban	No	Medium	1.Natural	1
113	Senior	Woman	Urban	No	Medium	1.Negligen	3
114	Young	Woman	Urban	No	Medium	1.Accident	2
114	Young	Woman	Urban	No	Medium	1.Deliberate	4
114	Young	Woman	Urban	No	Medium	1.Natural	1
114	Young	Woman	Urban	No	Medium	1.Negligen	3
115	MiddleAged	Woman	Urban	No	High	1.Accident	2
115	MiddleAged	Woman	Urban	No	High	1.Deliberate	4
115	MiddleAged	Woman	Urban	No	High	1.Natural	1
115	MiddleAged	Woman	Urban	No	High	1.Negligen	3
116	Young	Man	Urban	Yes	High	1.Accident	2
116	Young	Man	Urban	Yes	High	1.Deliberate	4
116	Young	Man	Urban	Yes	High	1.Natural	1
116	Young	Man	Urban	Yes	High	1.Negligen	3
117	MiddleAged	Man	Urban	No	Medium	1.Accident	2
117	MiddleAged	Man	Urban	No	Medium	1.Deliberate	3
117	MiddleAged	Man	Urban	No	Medium	1.Natural	1
117	MiddleAged	Man	Urban	No	Medium	1.Negligen	4
118	MiddleAged	Man	Urban	No	High	1.Accident	2
118	MiddleAged	Man	Urban	No	High	1.Deliberate	4
118	MiddleAged	Man	Urban	No	High	1.Natural	1
118	MiddleAged	Man	Urban	No	High	1.Negligen	3
119	MiddleAged	Woman	Urban	No	Medium	1.Accident	2
119	MiddleAged	Woman	Urban	No	Medium	1.Deliberate	4
119	MiddleAged	Woman	Urban	No	Medium	1.Natural	1
119	MiddleAged	Woman	Urban	No	Medium	1.Negligen	3
120	Senior	Man	Rural	No	Low	1.Accident	2
120	Senior	Man	Rural	No	Low	1.Deliberate	4
120	Senior	Man	Rural	No	Low	1.Natural	1
120	Senior	Man	Rural	No	Low	1.Negligen	3
121	MiddleAged	Woman	Urban	No	Medium	1.Accident	2
121	MiddleAged	Woman	Urban	No	Medium	1.Deliberate	4
121	MiddleAged	Woman	Urban	No	Medium	1.Natural	1
121	MiddleAged	Woman	Urban	No	Medium	1.Negligen	3
122	Senior	Man	Urban	No	Low	1.Accident	3
122	Senior	Man	Urban	No	Low	1.Deliberate	2
122	Senior	Man	Urban	No	Low	1.Natural	4
122	Senior	Man	Urban	No	Low	1.Negligen	1
123	Young	Man	Urban	Yes	Medium	1.Accident	2
123	Young	Man	Urban	Yes	Medium	1.Deliberate	4
123	Young	Man	Urban	Yes	Medium	1.Natural	1
123	Young	Man	Urban	Yes	Medium	1.Negligen	3
124	MiddleAged	Woman	Urban	No	Medium	1.Accident	2
124	MiddleAged	Woman	Urban	No	Medium	1.Deliberate	3
124	MiddleAged	Woman	Urban	No	Medium	1.Natural	1
124	MiddleAged	Woman	Urban	No	Medium	1.Negligen	4
125	Young	Woman	Urban	Yes	High	1.Accident	2
125	Young	Woman	Urban	Yes	High	1.Deliberate	4
125	Young	Woman	Urban	Yes	High	1.Natural	1
125	Young	Woman	Urban	Yes	High	1.Negligen	3
126	MiddleAged	Man	Urban	Yes	Medium	1.Accident	2
126	MiddleAged	Man	Urban	Yes	Medium	1.Deliberate	4
126	MiddleAged	Man	Urban	Yes	Medium	1.Natural	1
126	MiddleAged	Man	Urban	Yes	Medium	1.Negligen	3
127	Senior	Woman	Rural	Yes	Medium	1.Accident	2
127	Senior	Woman	Rural	Yes	Medium	1.Deliberate	3
127	Senior	Woman	Rural	Yes	Medium	1.Natural	1
127	Senior	Woman	Rural	Yes	Medium	1.Negligen	4
128	MiddleAged	Man	Urban	No	High	1.Accident	2
128	MiddleAged	Man	Urban	No	High	1.Deliberate	4
128	MiddleAged	Man	Urban	No	High	1.Natural	1
128	MiddleAged	Man	Urban	No	High	1.Negligen	3
129	MiddleAged	Man	Urban	No	High	1.Accident	3
129	MiddleAged	Man	Urban	No	High	1.Deliberate	4
129	MiddleAged	Man	Urban	No	High	1.Natural	1
129	MiddleAged	Man	Urban	No	High	1.Negligen	2
130	Young	Woman	Urban	Yes	Medium	1.Accident	2
130	Young	Woman	Urban	Yes	Medium	1.Deliberate	4
130	Young	Woman	Urban	Yes	Medium	1.Natural	1
130	Young	Woman	Urban	Yes	Medium	1.Negligen	3
131	Senior	Woman	Rural	No	Low	1.Accident	2
131	Senior	Woman	Rural	No	Low	1.Deliberate	4
131	Senior	Woman	Rural	No	Low	1.Natural	1
131	Senior	Woman	Rural	No	Low	1.Negligen	3
132	Young	Man	Urban	Yes	Medium	1.Accident	2
132	Young	Man	Urban	Yes	Medium	1.Deliberate	4
132	Young	Man	Urban	Yes	Medium	1.Natural	1
132	Young	Man	Urban	Yes	Medium	1.Negligen	3
133	Senior	Man	Rural	Yes	Low	1.Accident	2
133	Senior	Man	Rural	Yes	Low	1.Deliberate	4
133	Senior	Man	Rural	Yes	Low	1.Natural	1
133	Senior	Man	Rural	Yes	Low	1.Negligen	3
134	MiddleAged	Woman	Urban	Yes	Medium	1.Accident	2
134	MiddleAged	Woman	Urban	Yes	Medium	1.Deliberate	3
134	MiddleAged	Woman	Urban	Yes	Medium	1.Natural	1
134	MiddleAged	Woman	Urban	Yes	Medium	1.Negligen	4
135	Senior	Man	Urban	Yes	Medium	1.Accident	2
135	Senior	Man	Urban	Yes	Medium	1.Deliberate	4
135	Senior	Man	Urban	Yes	Medium	1.Natural	1
135	Senior	Man	Urban	Yes	Medium	1.Negligen	3
136	Young	Woman	Urban	Yes	High	1.Accident	2
136	Young	Woman	Urban	Yes	High	1.Deliberate	4
136	Young	Woman	Urban	Yes	High	1.Natural	1
136	Young	Woman	Urban	Yes	High	1.Negligen	3
137	MiddleAged	Woman	Urban	Yes	High	1.Accident	2
137	MiddleAged	Woman	Urban	Yes	High	1.Deliberate	3
137	MiddleAged	Woman	Urban	Yes	High	1.Natural	1
137	MiddleAged	Woman	Urban	Yes	High	1.Negligen	4
138	Senior	Woman	Rural	Yes	Medium	1.Accident	1
138	Senior	Woman	Rural	Yes	Medium	1.Deliberate	4
138	Senior	Woman	Rural	Yes	Medium	1.Natural	2
138	Senior	Woman	Rural	Yes	Medium	1.Negligen	3
139	Senior	Man	Urban	No	Medium	1.Accident	2
139	Senior	Man	Urban	No	Medium	1.Deliberate	4
139	Senior	Man	Urban	No	Medium	1.Natural	1
139	Senior	Man	Urban	No	Medium	1.Negligen	3
140	MiddleAged	Man	Rural	Yes	Medium	1.Accident	2
140	MiddleAged	Man	Rural	Yes	Medium	1.Deliberate	3
140	MiddleAged	Man	Rural	Yes	Medium	1.Natural	1
140	MiddleAged	Man	Rural	Yes	Medium	1.Negligen	4
141	MiddleAged	Woman	Urban	No	High	1.Accident	2
141	MiddleAged	Woman	Urban	No	High	1.Deliberate	4
141	MiddleAged	Woman	Urban	No	High	1.Natural	1
141	MiddleAged	Woman	Urban	No	High	1.Negligen	3
142	Young	Woman	Urban	No	High	1.Accident	2
142	Young	Woman	Urban	No	High	1.Deliberate	4
142	Young	Woman	Urban	No	High	1.Natural	1
142	Young	Woman	Urban	No	High	1.Negligen	3
143	MiddleAged	Man	Urban	No	Medium	1.Accident	2
143	MiddleAged	Man	Urban	No	Medium	1.Deliberate	4
143	MiddleAged	Man	Urban	No	Medium	1.Natural	1
143	MiddleAged	Man	Urban	No	Medium	1.Negligen	3
144	MiddleAged	Man	Rural	Yes	High	1.Accident	2
144	MiddleAged	Man	Rural	Yes	High	1.Deliberate	4
144	MiddleAged	Man	Rural	Yes	High	1.Natural	1
144	MiddleAged	Man	Rural	Yes	High	1.Negligen	3
145	Young	Woman	Urban	Yes	High	1.Accident	2
145	Young	Woman	Urban	Yes	High	1.Deliberate	4
145	Young	Woman	Urban	Yes	High	1.Natural	1
145	Young	Woman	Urban	Yes	High	1.Negligen	3
146	MiddleAged	Woman	Urban	No	Medium	1.Accident	2
146	MiddleAged	Woman	Urban	No	Medium	1.Deliberate	4
146	MiddleAged	Woman	Urban	No	Medium	1.Natural	1
146	MiddleAged	Woman	Urban	No	Medium	1.Negligen	3
147	MiddleAged	Man	Urban	No	High	1.Accident	2
147	MiddleAged	Man	Urban	No	High	1.Deliberate	4
147	MiddleAged	Man	Urban	No	High	1.Natural	1
147	MiddleAged	Man	Urban	No	High	1.Negligen	3
148	Senior	Man	Rural	Yes	Low	1.Accident	2
148	Senior	Man	Rural	Yes	Low	1.Deliberate	4
148	Senior	Man	Rural	Yes	Low	1.Natural	1
148	Senior	Man	Rural	Yes	Low	1.Negligen	3
149	MiddleAged	Woman	Urban	No	Medium	1.Accident	2
149	MiddleAged	Woman	Urban	No	Medium	1.Deliberate	4
149	MiddleAged	Woman	Urban	No	Medium	1.Natural	1
149	MiddleAged	Woman	Urban	No	Medium	1.Negligen	3
150	MiddleAged	Woman	Urban	No	High	1.Accident	2
150	MiddleAged	Woman	Urban	No	High	1.Deliberate	3
150	MiddleAged	Woman	Urban	No	High	1.Natural	1
150	MiddleAged	Woman	Urban	No	High	1.Negligen	4
151	MiddleAged	Woman	Urban	No	Medium	1.Accident	2
151	MiddleAged	Woman	Urban	No	Medium	1.Deliberate	4
151	MiddleAged	Woman	Urban	No	Medium	1.Natural	1
151	MiddleAged	Woman	Urban	No	Medium	1.Negligen	3
152	Young	Man	Urban	Yes	High	1.Accident	2
152	Young	Man	Urban	Yes	High	1.Deliberate	4
152	Young	Man	Urban	Yes	High	1.Natural	1
152	Young	Man	Urban	Yes	High	1.Negligen	3
153	Senior	Woman	Rural	No	Low	1.Accident	1
153	Senior	Woman	Rural	No	Low	1.Deliberate	4
153	Senior	Woman	Rural	No	Low	1.Natural	2
153	Senior	Woman	Rural	No	Low	1.Negligen	3
154	Senior	Man	Rural	Yes	Low	1.Accident	2
154	Senior	Man	Rural	Yes	Low	1.Deliberate	4
154	Senior	Man	Rural	Yes	Low	1.Natural	1
154	Senior	Man	Rural	Yes	Low	1.Negligen	3
155	MiddleAged	Man	Urban	Yes	Medium	1.Accident	2
155	MiddleAged	Man	Urban	Yes	Medium	1.Deliberate	3
155	MiddleAged	Man	Urban	Yes	Medium	1.Natural	1
155	MiddleAged	Man	Urban	Yes	Medium	1.Negligen	4
156	Young	Man	Urban	Yes	High	1.Accident	2
156	Young	Man	Urban	Yes	High	1.Deliberate	4
156	Young	Man	Urban	Yes	High	1.Natural	1
156	Young	Man	Urban	Yes	High	1.Negligen	3
157	MiddleAged	Woman	Urban	Yes	Medium	1.Accident	4
157	MiddleAged	Woman	Urban	Yes	Medium	1.Deliberate	2
157	MiddleAged	Woman	Urban	Yes	Medium	1.Natural	1
157	MiddleAged	Woman	Urban	Yes	Medium	1.Negligen	3
158	Senior	Man	Urban	No	Low	1.Accident	2
158	Senior	Man	Urban	No	Low	1.Deliberate	3
158	Senior	Man	Urban	No	Low	1.Natural	1
158	Senior	Man	Urban	No	Low	1.Negligen	4
159	MiddleAged	Woman	Urban	No	Medium	1.Accident	2
159	MiddleAged	Woman	Urban	No	Medium	1.Deliberate	3
159	MiddleAged	Woman	Urban	No	Medium	1.Natural	1
159	MiddleAged	Woman	Urban	No	Medium	1.Negligen	4
160	MiddleAged	Man	Urban	No	Medium	1.Accident	2
160	MiddleAged	Man	Urban	No	Medium	1.Deliberate	4
160	MiddleAged	Man	Urban	No	Medium	1.Natural	1
160	MiddleAged	Man	Urban	No	Medium	1.Negligen	3
161	MiddleAged	Woman	Rural	Yes	Medium	1.Accident	2
161	MiddleAged	Woman	Rural	Yes	Medium	1.Deliberate	4
161	MiddleAged	Woman	Rural	Yes	Medium	1.Natural	1
161	MiddleAged	Woman	Rural	Yes	Medium	1.Negligen	3
162	MiddleAged	Woman	Urban	No	Medium	1.Accident	2
162	MiddleAged	Woman	Urban	No	Medium	1.Deliberate	4
162	MiddleAged	Woman	Urban	No	Medium	1.Natural	1
162	MiddleAged	Woman	Urban	No	Medium	1.Negligen	3
163	Senior	Woman	Urban	No	Medium	1.Accident	2
163	Senior	Woman	Urban	No	Medium	1.Deliberate	4
163	Senior	Woman	Urban	No	Medium	1.Natural	1
163	Senior	Woman	Urban	No	Medium	1.Negligen	3
164	Senior	Woman	Rural	No	Low	1.Accident	2
164	Senior	Woman	Rural	No	Low	1.Deliberate	3
164	Senior	Woman	Rural	No	Low	1.Natural	1
164	Senior	Woman	Rural	No	Low	1.Negligen	4
165	Senior	Man	Rural	No	Low	1.Accident	2
165	Senior	Man	Rural	No	Low	1.Deliberate	4
165	Senior	Man	Rural	No	Low	1.Natural	1
165	Senior	Man	Rural	No	Low	1.Negligen	3
166	Senior	Woman	Urban	No	Low	1.Accident	2
166	Senior	Woman	Urban	No	Low	1.Deliberate	4
166	Senior	Woman	Urban	No	Low	1.Natural	1
166	Senior	Woman	Urban	No	Low	1.Negligen	3
167	Young	Man	Urban	No	High	1.Accident	2
167	Young	Man	Urban	No	High	1.Deliberate	4
167	Young	Man	Urban	No	High	1.Natural	1
167	Young	Man	Urban	No	High	1.Negligen	3
168	MiddleAged	Woman	Urban	No	Medium	1.Accident	2
168	MiddleAged	Woman	Urban	No	Medium	1.Deliberate	3
168	MiddleAged	Woman	Urban	No	Medium	1.Natural	1
168	MiddleAged	Woman	Urban	No	Medium	1.Negligen	4
169	MiddleAged	Woman	Urban	No	Medium	1.Accident	2
169	MiddleAged	Woman	Urban	No	Medium	1.Deliberate	4
169	MiddleAged	Woman	Urban	No	Medium	1.Natural	1
169	MiddleAged	Woman	Urban	No	Medium	1.Negligen	3
170	MiddleAged	Woman	Urban	Yes	Medium	1.Accident	3
170	MiddleAged	Woman	Urban	Yes	Medium	1.Deliberate	2
170	MiddleAged	Woman	Urban	Yes	Medium	1.Natural	1
170	MiddleAged	Woman	Urban	Yes	Medium	1.Negligen	4
171	Senior	Man	Urban	No	Low	1.Accident	2
171	Senior	Man	Urban	No	Low	1.Deliberate	4
171	Senior	Man	Urban	No	Low	1.Natural	1
171	Senior	Man	Urban	No	Low	1.Negligen	3
172	MiddleAged	Woman	Urban	Yes	Medium	1.Accident	2
172	MiddleAged	Woman	Urban	Yes	Medium	1.Deliberate	3
172	MiddleAged	Woman	Urban	Yes	Medium	1.Natural	1
172	MiddleAged	Woman	Urban	Yes	Medium	1.Negligen	4
173	Senior	Man	Rural	No	Low	1.Accident	3
173	Senior	Man	Rural	No	Low	1.Deliberate	4
173	Senior	Man	Rural	No	Low	1.Natural	1
173	Senior	Man	Rural	No	Low	1.Negligen	2
174	Senior	Man	Rural	Yes	Low	1.Accident	3
174	Senior	Man	Rural	Yes	Low	1.Deliberate	1
174	Senior	Man	Rural	Yes	Low	1.Natural	2
174	Senior	Man	Rural	Yes	Low	1.Negligen	4
175	MiddleAged	Woman	Urban	No	Medium	1.Accident	3
175	MiddleAged	Woman	Urban	No	Medium	1.Deliberate	4
175	MiddleAged	Woman	Urban	No	Medium	1.Natural	1
175	MiddleAged	Woman	Urban	No	Medium	1.Negligen	2
176	Senior	Woman	Urban	No	Low	1.Accident	3
176	Senior	Woman	Urban	No	Low	1.Deliberate	2
176	Senior	Woman	Urban	No	Low	1.Natural	4
176	Senior	Woman	Urban	No	Low	1.Negligen	1
177	MiddleAged	Man	Urban	No	Medium	1.Accident	2
177	MiddleAged	Man	Urban	No	Medium	1.Deliberate	4
177	MiddleAged	Man	Urban	No	Medium	1.Natural	1
177	MiddleAged	Man	Urban	No	Medium	1.Negligen	3
178	Senior	Woman	Urban	No	Low	1.Accident	2
178	Senior	Woman	Urban	No	Low	1.Deliberate	4
178	Senior	Woman	Urban	No	Low	1.Natural	1
178	Senior	Woman	Urban	No	Low	1.Negligen	3
179	Young	Woman	Urban	Yes	High	1.Accident	2
179	Young	Woman	Urban	Yes	High	1.Deliberate	3
179	Young	Woman	Urban	Yes	High	1.Natural	1
179	Young	Woman	Urban	Yes	High	1.Negligen	4
180	Senior	Woman	Rural	Yes	Low	1.Accident	1
180	Senior	Woman	Rural	Yes	Low	1.Deliberate	3
180	Senior	Woman	Rural	Yes	Low	1.Natural	2
180	Senior	Woman	Rural	Yes	Low	1.Negligen	4
181	Senior	Man	Urban	No	Medium	1.Accident	3
181	Senior	Man	Urban	No	Medium	1.Deliberate	2
181	Senior	Man	Urban	No	Medium	1.Natural	4
181	Senior	Man	Urban	No	Medium	1.Negligen	1
182	MiddleAged	Man	Urban	No	Medium	1.Accident	3
182	MiddleAged	Man	Urban	No	Medium	1.Deliberate	4
182	MiddleAged	Man	Urban	No	Medium	1.Natural	1
182	MiddleAged	Man	Urban	No	Medium	1.Negligen	2
183	Senior	Woman	Urban	No	Low	1.Accident	2
183	Senior	Woman	Urban	No	Low	1.Deliberate	4
183	Senior	Woman	Urban	No	Low	1.Natural	1
183	Senior	Woman	Urban	No	Low	1.Negligen	3
184	MiddleAged	Man	Urban	No	Medium	1.Accident	2
184	MiddleAged	Man	Urban	No	Medium	1.Deliberate	3
184	MiddleAged	Man	Urban	No	Medium	1.Natural	1
184	MiddleAged	Man	Urban	No	Medium	1.Negligen	4
185	Young	Man	Urban	No	High	1.Accident	2
185	Young	Man	Urban	No	High	1.Deliberate	4
185	Young	Man	Urban	No	High	1.Natural	1
185	Young	Man	Urban	No	High	1.Negligen	3
186	MiddleAged	Woman	Rural	Yes	Medium	1.Accident	2
186	MiddleAged	Woman	Rural	Yes	Medium	1.Deliberate	4
186	MiddleAged	Woman	Rural	Yes	Medium	1.Natural	1
186	MiddleAged	Woman	Rural	Yes	Medium	1.Negligen	3
187	Senior	Woman	Urban	No	Medium	1.Accident	2
187	Senior	Woman	Urban	No	Medium	1.Deliberate	4
187	Senior	Woman	Urban	No	Medium	1.Natural	1
187	Senior	Woman	Urban	No	Medium	1.Negligen	3
188	MiddleAged	Man	Urban	Yes	Medium	1.Accident	2
188	MiddleAged	Man	Urban	Yes	Medium	1.Deliberate	4
188	MiddleAged	Man	Urban	Yes	Medium	1.Natural	1
188	MiddleAged	Man	Urban	Yes	Medium	1.Negligen	3
189	MiddleAged	Man	Urban	Yes	High	1.Accident	3
189	MiddleAged	Man	Urban	Yes	High	1.Deliberate	4
189	MiddleAged	Man	Urban	Yes	High	1.Natural	1
189	MiddleAged	Man	Urban	Yes	High	1.Negligen	2
190	Young	Woman	Urban	Yes	High	1.Accident	3
190	Young	Woman	Urban	Yes	High	1.Deliberate	2
190	Young	Woman	Urban	Yes	High	1.Natural	1
190	Young	Woman	Urban	Yes	High	1.Negligen	4
191	MiddleAged	Woman	Urban	Yes	Medium	1.Accident	3
191	MiddleAged	Woman	Urban	Yes	Medium	1.Deliberate	2
191	MiddleAged	Woman	Urban	Yes	Medium	1.Natural	1
191	MiddleAged	Woman	Urban	Yes	Medium	1.Negligen	4
192	Young	Man	Urban	Yes	Medium	1.Accident	3
192	Young	Man	Urban	Yes	Medium	1.Deliberate	4
192	Young	Man	Urban	Yes	Medium	1.Natural	1
192	Young	Man	Urban	Yes	Medium	1.Negligen	2
193	MiddleAged	Man	Urban	No	Low	1.Accident	3
193	MiddleAged	Man	Urban	No	Low	1.Deliberate	4
193	MiddleAged	Man	Urban	No	Low	1.Natural	1
193	MiddleAged	Man	Urban	No	Low	1.Negligen	2
194	Senior	Woman	Urban	No	Low	1.Accident	2
194	Senior	Woman	Urban	No	Low	1.Deliberate	4
194	Senior	Woman	Urban	No	Low	1.Natural	1
194	Senior	Woman	Urban	No	Low	1.Negligen	3
195	MiddleAged	Woman	Urban	No	Medium	1.Accident	2
195	MiddleAged	Woman	Urban	No	Medium	1.Deliberate	3
195	MiddleAged	Woman	Urban	No	Medium	1.Natural	1
195	MiddleAged	Woman	Urban	No	Medium	1.Negligen	4
196	MiddleAged	Woman	Urban	Yes	High	1.Accident	3
196	MiddleAged	Woman	Urban	Yes	High	1.Deliberate	1
196	MiddleAged	Woman	Urban	Yes	High	1.Natural	2
196	MiddleAged	Woman	Urban	Yes	High	1.Negligen	4
197	MiddleAged	Man	Rural	Yes	Medium	1.Accident	2
197	MiddleAged	Man	Rural	Yes	Medium	1.Deliberate	4
197	MiddleAged	Man	Rural	Yes	Medium	1.Natural	1
197	MiddleAged	Man	Rural	Yes	Medium	1.Negligen	3
198	MiddleAged	Man	Urban	Yes	Medium	1.Accident	2
198	MiddleAged	Man	Urban	Yes	Medium	1.Deliberate	4
198	MiddleAged	Man	Urban	Yes	Medium	1.Natural	1
198	MiddleAged	Man	Urban	Yes	Medium	1.Negligen	3
199	Young	Woman	Rural	Yes	Medium	1.Accident	2
199	Young	Woman	Rural	Yes	Medium	1.Deliberate	3
199	Young	Woman	Rural	Yes	Medium	1.Natural	1
199	Young	Woman	Rural	Yes	Medium	1.Negligen	4
200	Senior	Man	Rural	Yes	Low	1.Accident	3
200	Senior	Man	Rural	Yes	Low	1.Deliberate	4
200	Senior	Man	Rural	Yes	Low	1.Natural	1
200	Senior	Man	Rural	Yes	Low	1.Negligen	2
201	Senior	Woman	Urban	Yes	Medium	1.Accident	2
201	Senior	Woman	Urban	Yes	Medium	1.Deliberate	4
201	Senior	Woman	Urban	Yes	Medium	1.Natural	1
201	Senior	Woman	Urban	Yes	Medium	1.Negligen	3
202	Young	Woman	Urban	Yes	High	1.Accident	2
202	Young	Woman	Urban	Yes	High	1.Deliberate	3
202	Young	Woman	Urban	Yes	High	1.Natural	1
202	Young	Woman	Urban	Yes	High	1.Negligen	4
203	Senior	Man	Rural	Yes	Medium	1.Accident	1
203	Senior	Man	Rural	Yes	Medium	1.Deliberate	3
203	Senior	Man	Rural	Yes	Medium	1.Natural	2
203	Senior	Man	Rural	Yes	Medium	1.Negligen	4
204	MiddleAged	Woman	Rural	Yes	Medium	1.Accident	2
204	MiddleAged	Woman	Rural	Yes	Medium	1.Deliberate	4
204	MiddleAged	Woman	Rural	Yes	Medium	1.Natural	1
204	MiddleAged	Woman	Rural	Yes	Medium	1.Negligen	3
205	Young	Man	Urban	No	Medium	1.Accident	2
205	Young	Man	Urban	No	Medium	1.Deliberate	4
205	Young	Man	Urban	No	Medium	1.Natural	1
205	Young	Man	Urban	No	Medium	1.Negligen	3
206	MiddleAged	Woman	Urban	No	Medium	1.Accident	2
206	MiddleAged	Woman	Urban	No	Medium	1.Deliberate	3
206	MiddleAged	Woman	Urban	No	Medium	1.Natural	1
206	MiddleAged	Woman	Urban	No	Medium	1.Negligen	4
207	Senior	Woman	Urban	No	Low	1.Accident	3
207	Senior	Woman	Urban	No	Low	1.Deliberate	1
207	Senior	Woman	Urban	No	Low	1.Natural	2
207	Senior	Woman	Urban	No	Low	1.Negligen	4
208	MiddleAged	Man	Urban	Yes	High	1.Accident	2
208	MiddleAged	Man	Urban	Yes	High	1.Deliberate	4
208	MiddleAged	Man	Urban	Yes	High	1.Natural	1
208	MiddleAged	Man	Urban	Yes	High	1.Negligen	3
209	Senior	Man	Rural	Yes	Medium	1.Accident	3
209	Senior	Man	Rural	Yes	Medium	1.Deliberate	2
209	Senior	Man	Rural	Yes	Medium	1.Natural	1
209	Senior	Man	Rural	Yes	Medium	1.Negligen	4
210	MiddleAged	Man	Urban	Yes	High	1.Accident	2
210	MiddleAged	Man	Urban	Yes	High	1.Deliberate	4
210	MiddleAged	Man	Urban	Yes	High	1.Natural	1
210	MiddleAged	Man	Urban	Yes	High	1.Negligen	3
211	MiddleAged	Woman	Urban	Yes	High	1.Accident	2
211	MiddleAged	Woman	Urban	Yes	High	1.Deliberate	4
211	MiddleAged	Woman	Urban	Yes	High	1.Natural	1
211	MiddleAged	Woman	Urban	Yes	High	1.Negligen	3
212	MiddleAged	Woman	Urban	No	Medium	1.Accident	3
212	MiddleAged	Woman	Urban	No	Medium	1.Deliberate	4
212	MiddleAged	Woman	Urban	No	Medium	1.Natural	1
212	MiddleAged	Woman	Urban	No	Medium	1.Negligen	2
213	Senior	Woman	Rural	Yes	Low	1.Accident	2
213	Senior	Woman	Rural	Yes	Low	1.Deliberate	3
213	Senior	Woman	Rural	Yes	Low	1.Natural	1
213	Senior	Woman	Rural	Yes	Low	1.Negligen	4
214	MiddleAged	Man	Urban	No	Medium	1.Accident	2
214	MiddleAged	Man	Urban	No	Medium	1.Deliberate	4
214	MiddleAged	Man	Urban	No	Medium	1.Natural	1
214	MiddleAged	Man	Urban	No	Medium	1.Negligen	3
215	Senior	Woman	Rural	Yes	Low	1.Accident	2
215	Senior	Woman	Rural	Yes	Low	1.Deliberate	4
215	Senior	Woman	Rural	Yes	Low	1.Natural	1
215	Senior	Woman	Rural	Yes	Low	1.Negligen	3
216	MiddleAged	Woman	Urban	No	Medium	1.Accident	3
216	MiddleAged	Woman	Urban	No	Medium	1.Deliberate	4
216	MiddleAged	Woman	Urban	No	Medium	1.Natural	1
216	MiddleAged	Woman	Urban	No	Medium	1.Negligen	2
217	MiddleAged	Man	Urban	Yes	Medium	1.Accident	2
217	MiddleAged	Man	Urban	Yes	Medium	1.Deliberate	4
217	MiddleAged	Man	Urban	Yes	Medium	1.Natural	1
217	MiddleAged	Man	Urban	Yes	Medium	1.Negligen	3
218	MiddleAged	Woman	Rural	Yes	Medium	1.Accident	2
218	MiddleAged	Woman	Rural	Yes	Medium	1.Deliberate	3
218	MiddleAged	Woman	Rural	Yes	Medium	1.Natural	1
218	MiddleAged	Woman	Rural	Yes	Medium	1.Negligen	4
219	Senior	Man	Rural	No	Low	1.Accident	2
219	Senior	Man	Rural	No	Low	1.Deliberate	4
219	Senior	Man	Rural	No	Low	1.Natural	1
219	Senior	Man	Rural	No	Low	1.Negligen	3
220	Senior	Woman	Rural	Yes	Medium	1.Accident	2
220	Senior	Woman	Rural	Yes	Medium	1.Deliberate	3
220	Senior	Woman	Rural	Yes	Medium	1.Natural	1
220	Senior	Woman	Rural	Yes	Medium	1.Negligen	4
221	MiddleAged	Woman	Urban	Yes	High	1.Accident	2
221	MiddleAged	Woman	Urban	Yes	High	1.Deliberate	3
221	MiddleAged	Woman	Urban	Yes	High	1.Natural	1
221	MiddleAged	Woman	Urban	Yes	High	1.Negligen	4
222	MiddleAged	Woman	Urban	No	High	1.Accident	2
222	MiddleAged	Woman	Urban	No	High	1.Deliberate	3
222	MiddleAged	Woman	Urban	No	High	1.Natural	1
222	MiddleAged	Woman	Urban	No	High	1.Negligen	4
223	MiddleAged	Man	Urban	No	Medium	1.Accident	2
223	MiddleAged	Man	Urban	No	Medium	1.Deliberate	4
223	MiddleAged	Man	Urban	No	Medium	1.Natural	1
223	MiddleAged	Man	Urban	No	Medium	1.Negligen	3
224	MiddleAged	Woman	Urban	No	Low	1.Accident	2
224	MiddleAged	Woman	Urban	No	Low	1.Deliberate	4
224	MiddleAged	Woman	Urban	No	Low	1.Natural	1
224	MiddleAged	Woman	Urban	No	Low	1.Negligen	3
225	Young	Man	Urban	Yes	High	1.Accident	2
225	Young	Man	Urban	Yes	High	1.Deliberate	4
225	Young	Man	Urban	Yes	High	1.Natural	1
225	Young	Man	Urban	Yes	High	1.Negligen	3
226	Young	Man	Urban	Yes	Medium	1.Accident	2
226	Young	Man	Urban	Yes	Medium	1.Deliberate	4
226	Young	Man	Urban	Yes	Medium	1.Natural	1
226	Young	Man	Urban	Yes	Medium	1.Negligen	3
227	Senior	Woman	Rural	Yes	Medium	1.Accident	1
227	Senior	Woman	Rural	Yes	Medium	1.Deliberate	4
227	Senior	Woman	Rural	Yes	Medium	1.Natural	2
227	Senior	Woman	Rural	Yes	Medium	1.Negligen	3
228	MiddleAged	Woman	Urban	Yes	Low	1.Accident	3
228	MiddleAged	Woman	Urban	Yes	Low	1.Deliberate	4
228	MiddleAged	Woman	Urban	Yes	Low	1.Natural	1
228	MiddleAged	Woman	Urban	Yes	Low	1.Negligen	2
229	Senior	Man	Urban	Yes	Low	1.Accident	2
229	Senior	Man	Urban	Yes	Low	1.Deliberate	4
229	Senior	Man	Urban	Yes	Low	1.Natural	1
229	Senior	Man	Urban	Yes	Low	1.Negligen	3
230	MiddleAged	Woman	Urban	No	Medium	1.Accident	2
230	MiddleAged	Woman	Urban	No	Medium	1.Deliberate	3
230	MiddleAged	Woman	Urban	No	Medium	1.Natural	1
230	MiddleAged	Woman	Urban	No	Medium	1.Negligen	4
231	Young	Woman	Urban	Yes	High	1.Accident	2
231	Young	Woman	Urban	Yes	High	1.Deliberate	4
231	Young	Woman	Urban	Yes	High	1.Natural	1
231	Young	Woman	Urban	Yes	High	1.Negligen	3
232	Young	Man	Urban	Yes	Medium	1.Accident	2
232	Young	Man	Urban	Yes	Medium	1.Deliberate	4
232	Young	Man	Urban	Yes	Medium	1.Natural	1
232	Young	Man	Urban	Yes	Medium	1.Negligen	3
233	Senior	Woman	Rural	Yes	Low	1.Accident	2
233	Senior	Woman	Rural	Yes	Low	1.Deliberate	4
233	Senior	Woman	Rural	Yes	Low	1.Natural	1
233	Senior	Woman	Rural	Yes	Low	1.Negligen	3
234	Young	Woman	Urban	Yes	High	1.Accident	2
234	Young	Woman	Urban	Yes	High	1.Deliberate	3
234	Young	Woman	Urban	Yes	High	1.Natural	1
234	Young	Woman	Urban	Yes	High	1.Negligen	4
235	Young	Woman	Urban	No	High	1.Accident	2
235	Young	Woman	Urban	No	High	1.Deliberate	4
235	Young	Woman	Urban	No	High	1.Natural	1
235	Young	Woman	Urban	No	High	1.Negligen	3
236	MiddleAged	Man	Urban	No	Medium	1.Accident	3
236	MiddleAged	Man	Urban	No	Medium	1.Deliberate	4
236	MiddleAged	Man	Urban	No	Medium	1.Natural	1
236	MiddleAged	Man	Urban	No	Medium	1.Negligen	2
237	MiddleAged	Woman	Urban	No	Medium	1.Accident	2
237	MiddleAged	Woman	Urban	No	Medium	1.Deliberate	4
237	MiddleAged	Woman	Urban	No	Medium	1.Natural	1
237	MiddleAged	Woman	Urban	No	Medium	1.Negligen	3
238	MiddleAged	Woman	Urban	No	High	1.Accident	2
238	MiddleAged	Woman	Urban	No	High	1.Deliberate	3
238	MiddleAged	Woman	Urban	No	High	1.Natural	1
238	MiddleAged	Woman	Urban	No	High	1.Negligen	4
239	MiddleAged	Man	Urban	No	Medium	1.Accident	2
239	MiddleAged	Man	Urban	No	Medium	1.Deliberate	3
239	MiddleAged	Man	Urban	No	Medium	1.Natural	1
239	MiddleAged	Man	Urban	No	Medium	1.Negligen	4
240	Senior	Woman	Rural	Yes	Low	1.Accident	2
240	Senior	Woman	Rural	Yes	Low	1.Deliberate	4
240	Senior	Woman	Rural	Yes	Low	1.Natural	1
240	Senior	Woman	Rural	Yes	Low	1.Negligen	3
241	Senior	Woman	Rural	No	Low	1.Accident	2
241	Senior	Woman	Rural	No	Low	1.Deliberate	3
241	Senior	Woman	Rural	No	Low	1.Natural	1
241	Senior	Woman	Rural	No	Low	1.Negligen	4
242	Senior	Woman	Rural	No	Low	1.Accident	3
242	Senior	Woman	Rural	No	Low	1.Deliberate	2
242	Senior	Woman	Rural	No	Low	1.Natural	1
242	Senior	Woman	Rural	No	Low	1.Negligen	4
243	Young	Man	Urban	Yes	High	1.Accident	2
243	Young	Man	Urban	Yes	High	1.Deliberate	4
243	Young	Man	Urban	Yes	High	1.Natural	1
243	Young	Man	Urban	Yes	High	1.Negligen	3
244	Young	Man	Urban	No	Medium	1.Accident	2
244	Young	Man	Urban	No	Medium	1.Deliberate	4
244	Young	Man	Urban	No	Medium	1.Natural	1
244	Young	Man	Urban	No	Medium	1.Negligen	3
245	MiddleAged	Woman	Urban	Yes	Medium	1.Accident	2
245	MiddleAged	Woman	Urban	Yes	Medium	1.Deliberate	3
245	MiddleAged	Woman	Urban	Yes	Medium	1.Natural	1
245	MiddleAged	Woman	Urban	Yes	Medium	1.Negligen	4
246	Senior	Woman	Rural	No	Medium	1.Accident	3
246	Senior	Woman	Rural	No	Medium	1.Deliberate	2
246	Senior	Woman	Rural	No	Medium	1.Natural	1
246	Senior	Woman	Rural	No	Medium	1.Negligen	4
247	MiddleAged	Woman	Urban	No	High	1.Accident	2
247	MiddleAged	Woman	Urban	No	High	1.Deliberate	4
247	MiddleAged	Woman	Urban	No	High	1.Natural	1
247	MiddleAged	Woman	Urban	No	High	1.Negligen	3
248	Young	Woman	Urban	Yes	High	1.Accident	2
248	Young	Woman	Urban	Yes	High	1.Deliberate	4
248	Young	Woman	Urban	Yes	High	1.Natural	1
248	Young	Woman	Urban	Yes	High	1.Negligen	3
249	MiddleAged	Man	Urban	Yes	Medium	1.Accident	2
249	MiddleAged	Man	Urban	Yes	Medium	1.Deliberate	4
249	MiddleAged	Man	Urban	Yes	Medium	1.Natural	1
249	MiddleAged	Man	Urban	Yes	Medium	1.Negligen	3
250	MiddleAged	Man	Urban	No	Medium	1.Accident	2
250	MiddleAged	Man	Urban	No	Medium	1.Deliberate	4
250	MiddleAged	Man	Urban	No	Medium	1.Natural	1
250	MiddleAged	Man	Urban	No	Medium	1.Negligen	3
251	MiddleAged	Woman	Urban	No	Medium	1.Accident	2
251	MiddleAged	Woman	Urban	No	Medium	1.Deliberate	3
251	MiddleAged	Woman	Urban	No	Medium	1.Natural	1
251	MiddleAged	Woman	Urban	No	Medium	1.Negligen	4
252	Senior	Woman	Urban	Yes	Medium	1.Accident	2
252	Senior	Woman	Urban	Yes	Medium	1.Deliberate	4
252	Senior	Woman	Urban	Yes	Medium	1.Natural	1
252	Senior	Woman	Urban	Yes	Medium	1.Negligen	3
253	Senior	Man	Urban	No	Low	1.Accident	2
253	Senior	Man	Urban	No	Low	1.Deliberate	4
253	Senior	Man	Urban	No	Low	1.Natural	1
253	Senior	Man	Urban	No	Low	1.Negligen	3
254	MiddleAged	Woman	Urban	No	Medium	1.Accident	2
254	MiddleAged	Woman	Urban	No	Medium	1.Deliberate	3
254	MiddleAged	Woman	Urban	No	Medium	1.Natural	1
254	MiddleAged	Woman	Urban	No	Medium	1.Negligen	4
255	MiddleAged	Man	Urban	Yes	Medium	1.Accident	2
255	MiddleAged	Man	Urban	Yes	Medium	1.Deliberate	4
255	MiddleAged	Man	Urban	Yes	Medium	1.Natural	1
255	MiddleAged	Man	Urban	Yes	Medium	1.Negligen	3
256	Senior	Woman	Urban	Yes	Low	1.Accident	3
256	Senior	Woman	Urban	Yes	Low	1.Deliberate	1
256	Senior	Woman	Urban	Yes	Low	1.Natural	2
256	Senior	Woman	Urban	Yes	Low	1.Negligen	4
257	MiddleAged	Woman	Urban	No	Medium	1.Accident	2
257	MiddleAged	Woman	Urban	No	Medium	1.Deliberate	3
257	MiddleAged	Woman	Urban	No	Medium	1.Natural	1
257	MiddleAged	Woman	Urban	No	Medium	1.Negligen	4
258	Senior	Man	Rural	Yes	Low	1.Accident	2
258	Senior	Man	Rural	Yes	Low	1.Deliberate	4
258	Senior	Man	Rural	Yes	Low	1.Natural	1
258	Senior	Man	Rural	Yes	Low	1.Negligen	3
259	Young	Man	Urban	Yes	High	1.Accident	2
259	Young	Man	Urban	Yes	High	1.Deliberate	4
259	Young	Man	Urban	Yes	High	1.Natural	1
259	Young	Man	Urban	Yes	High	1.Negligen	3
260	Senior	Woman	Rural	No	Low	1.Accident	2
260	Senior	Woman	Rural	No	Low	1.Deliberate	4
260	Senior	Woman	Rural	No	Low	1.Natural	1
260	Senior	Woman	Rural	No	Low	1.Negligen	3
261	Young	Woman	Urban	No	High	1.Accident	2
261	Young	Woman	Urban	No	High	1.Deliberate	4
261	Young	Woman	Urban	No	High	1.Natural	1
261	Young	Woman	Urban	No	High	1.Negligen	3
262	Senior	Man	Rural	Yes	Low	1.Accident	3
262	Senior	Man	Rural	Yes	Low	1.Deliberate	2
262	Senior	Man	Rural	Yes	Low	1.Natural	1
262	Senior	Man	Rural	Yes	Low	1.Negligen	4
263	MiddleAged	Woman	Urban	No	Low	1.Accident	2
263	MiddleAged	Woman	Urban	No	Low	1.Deliberate	3
263	MiddleAged	Woman	Urban	No	Low	1.Natural	1
263	MiddleAged	Woman	Urban	No	Low	1.Negligen	4
264	MiddleAged	Man	Urban	No	Medium	1.Accident	3
264	MiddleAged	Man	Urban	No	Medium	1.Deliberate	4
264	MiddleAged	Man	Urban	No	Medium	1.Natural	1
264	MiddleAged	Man	Urban	No	Medium	1.Negligen	2
265	MiddleAged	Woman	Urban	No	Low	1.Accident	3
265	MiddleAged	Woman	Urban	No	Low	1.Deliberate	4
265	MiddleAged	Woman	Urban	No	Low	1.Natural	1
265	MiddleAged	Woman	Urban	No	Low	1.Negligen	2
266	Senior	Woman	Urban	No	Low	1.Accident	2
266	Senior	Woman	Urban	No	Low	1.Deliberate	4
266	Senior	Woman	Urban	No	Low	1.Natural	1
266	Senior	Woman	Urban	No	Low	1.Negligen	3
267	MiddleAged	Man	Urban	No	Medium	1.Accident	2
267	MiddleAged	Man	Urban	No	Medium	1.Deliberate	3
267	MiddleAged	Man	Urban	No	Medium	1.Natural	1
267	MiddleAged	Man	Urban	No	Medium	1.Negligen	4
268	Young	Woman	Urban	Yes	High	1.Accident	2
268	Young	Woman	Urban	Yes	High	1.Deliberate	4
268	Young	Woman	Urban	Yes	High	1.Natural	1
268	Young	Woman	Urban	Yes	High	1.Negligen	3
269	Senior	Woman	Urban	Yes	High	1.Accident	2
269	Senior	Woman	Urban	Yes	High	1.Deliberate	3
269	Senior	Woman	Urban	Yes	High	1.Natural	1
269	Senior	Woman	Urban	Yes	High	1.Negligen	4
270	Young	Woman	Urban	No	Medium	1.Accident	2
270	Young	Woman	Urban	No	Medium	1.Deliberate	4
270	Young	Woman	Urban	No	Medium	1.Natural	1
270	Young	Woman	Urban	No	Medium	1.Negligen	3
271	Senior	Woman	Urban	No	Low	1.Accident	3
271	Senior	Woman	Urban	No	Low	1.Deliberate	2
271	Senior	Woman	Urban	No	Low	1.Natural	4
271	Senior	Woman	Urban	No	Low	1.Negligen	1
272	Senior	Woman	Urban	Yes	High	1.Accident	2
272	Senior	Woman	Urban	Yes	High	1.Deliberate	4
272	Senior	Woman	Urban	Yes	High	1.Natural	1
272	Senior	Woman	Urban	Yes	High	1.Negligen	3
273	Young	Woman	Urban	No	High	1.Accident	2
273	Young	Woman	Urban	No	High	1.Deliberate	4
273	Young	Woman	Urban	No	High	1.Natural	1
273	Young	Woman	Urban	No	High	1.Negligen	3
274	MiddleAged	Man	Urban	No	Medium	1.Accident	2
274	MiddleAged	Man	Urban	No	Medium	1.Deliberate	4
274	MiddleAged	Man	Urban	No	Medium	1.Natural	1
274	MiddleAged	Man	Urban	No	Medium	1.Negligen	3
275	Senior	Woman	Rural	Yes	Low	1.Accident	2
275	Senior	Woman	Rural	Yes	Low	1.Deliberate	4
275	Senior	Woman	Rural	Yes	Low	1.Natural	1
275	Senior	Woman	Rural	Yes	Low	1.Negligen	3
276	Senior	Man	Rural	Yes	Low	1.Accident	2
276	Senior	Man	Rural	Yes	Low	1.Deliberate	4
276	Senior	Man	Rural	Yes	Low	1.Natural	1
276	Senior	Man	Rural	Yes	Low	1.Negligen	3
277	Senior	Man	Rural	Yes	Medium	1.Accident	2
277	Senior	Man	Rural	Yes	Medium	1.Deliberate	3
277	Senior	Man	Rural	Yes	Medium	1.Natural	1
277	Senior	Man	Rural	Yes	Medium	1.Negligen	4
278	Young	Woman	Urban	Yes	High	1.Accident	2
278	Young	Woman	Urban	Yes	High	1.Deliberate	3
278	Young	Woman	Urban	Yes	High	1.Natural	1
278	Young	Woman	Urban	Yes	High	1.Negligen	4
279	Young	Woman	Urban	Yes	Medium	1.Accident	2
279	Young	Woman	Urban	Yes	Medium	1.Deliberate	4
279	Young	Woman	Urban	Yes	Medium	1.Natural	1
279	Young	Woman	Urban	Yes	Medium	1.Negligen	3
280	Young	Woman	Urban	Yes	Medium	1.Accident	2
280	Young	Woman	Urban	Yes	Medium	1.Deliberate	4
280	Young	Woman	Urban	Yes	Medium	1.Natural	1
280	Young	Woman	Urban	Yes	Medium	1.Negligen	3
281	Senior	Man	Rural	Yes	Low	1.Accident	2
281	Senior	Man	Rural	Yes	Low	1.Deliberate	4
281	Senior	Man	Rural	Yes	Low	1.Natural	1
281	Senior	Man	Rural	Yes	Low	1.Negligen	3
282	Young	Man	Urban	Yes	High	1.Accident	2
282	Young	Man	Urban	Yes	High	1.Deliberate	4
282	Young	Man	Urban	Yes	High	1.Natural	1
282	Young	Man	Urban	Yes	High	1.Negligen	3
283	Young	Woman	Urban	Yes	Medium	1.Accident	2
283	Young	Woman	Urban	Yes	Medium	1.Deliberate	4
283	Young	Woman	Urban	Yes	Medium	1.Natural	1
283	Young	Woman	Urban	Yes	Medium	1.Negligen	3
284	MiddleAged	Woman	Urban	No	Medium	1.Accident	2
284	MiddleAged	Woman	Urban	No	Medium	1.Deliberate	4
284	MiddleAged	Woman	Urban	No	Medium	1.Natural	1
284	MiddleAged	Woman	Urban	No	Medium	1.Negligen	3
285	MiddleAged	Woman	Rural	Yes	Medium	1.Accident	2
285	MiddleAged	Woman	Rural	Yes	Medium	1.Deliberate	4
285	MiddleAged	Woman	Rural	Yes	Medium	1.Natural	1
285	MiddleAged	Woman	Rural	Yes	Medium	1.Negligen	3
286	Senior	Man	Rural	Yes	Low	1.Accident	3
286	Senior	Man	Rural	Yes	Low	1.Deliberate	4
286	Senior	Man	Rural	Yes	Low	1.Natural	1
286	Senior	Man	Rural	Yes	Low	1.Negligen	2
287	MiddleAged	Man	Urban	No	Low	1.Accident	2
287	MiddleAged	Man	Urban	No	Low	1.Deliberate	3
287	MiddleAged	Man	Urban	No	Low	1.Natural	1
287	MiddleAged	Man	Urban	No	Low	1.Negligen	4
288	Young	Woman	Urban	No	High	1.Accident	2
288	Young	Woman	Urban	No	High	1.Deliberate	4
288	Young	Woman	Urban	No	High	1.Natural	1
288	Young	Woman	Urban	No	High	1.Negligen	3
289	Senior	Woman	Rural	Yes	Low	1.Accident	3
289	Senior	Woman	Rural	Yes	Low	1.Deliberate	1
289	Senior	Woman	Rural	Yes	Low	1.Natural	2
289	Senior	Woman	Rural	Yes	Low	1.Negligen	4
290	Young	Man	Urban	Yes	Medium	1.Accident	2
290	Young	Man	Urban	Yes	Medium	1.Deliberate	3
290	Young	Man	Urban	Yes	Medium	1.Natural	1
290	Young	Man	Urban	Yes	Medium	1.Negligen	4
291	MiddleAged	Man	Urban	No	Medium	1.Accident	2
291	MiddleAged	Man	Urban	No	Medium	1.Deliberate	4
291	MiddleAged	Man	Urban	No	Medium	1.Natural	1
291	MiddleAged	Man	Urban	No	Medium	1.Negligen	3
292	MiddleAged	Woman	Urban	No	Low	1.Accident	4
292	MiddleAged	Woman	Urban	No	Low	1.Deliberate	2
292	MiddleAged	Woman	Urban	No	Low	1.Natural	1
292	MiddleAged	Woman	Urban	No	Low	1.Negligen	3
293	Senior	Woman	Rural	Yes	Low	1.Accident	3
293	Senior	Woman	Rural	Yes	Low	1.Deliberate	4
293	Senior	Woman	Rural	Yes	Low	1.Natural	1
293	Senior	Woman	Rural	Yes	Low	1.Negligen	2
294	MiddleAged	Man	Urban	No	Low	1.Accident	2
294	MiddleAged	Man	Urban	No	Low	1.Deliberate	3
294	MiddleAged	Man	Urban	No	Low	1.Natural	1
294	MiddleAged	Man	Urban	No	Low	1.Negligen	4
295	Senior	Woman	Urban	Yes	Medium	1.Accident	2
295	Senior	Woman	Urban	Yes	Medium	1.Deliberate	4
295	Senior	Woman	Urban	Yes	Medium	1.Natural	1
295	Senior	Woman	Urban	Yes	Medium	1.Negligen	3
296	Senior	Woman	Rural	Yes	Medium	1.Accident	2
296	Senior	Woman	Rural	Yes	Medium	1.Deliberate	4
296	Senior	Woman	Rural	Yes	Medium	1.Natural	1
296	Senior	Woman	Rural	Yes	Medium	1.Negligen	3
297	MiddleAged	Man	Urban	Yes	Medium	1.Accident	2
297	MiddleAged	Man	Urban	Yes	Medium	1.Deliberate	4
297	MiddleAged	Man	Urban	Yes	Medium	1.Natural	1
297	MiddleAged	Man	Urban	Yes	Medium	1.Negligen	3
298	Young	Man	Urban	No	Medium	1.Accident	2
298	Young	Man	Urban	No	Medium	1.Deliberate	3
298	Young	Man	Urban	No	Medium	1.Natural	1
298	Young	Man	Urban	No	Medium	1.Negligen	4
299	MiddleAged	Man	Urban	Yes	High	1.Accident	3
299	MiddleAged	Man	Urban	Yes	High	1.Deliberate	4
299	MiddleAged	Man	Urban	Yes	High	1.Natural	1
299	MiddleAged	Man	Urban	Yes	High	1.Negligen	2
300	MiddleAged	Woman	Urban	Yes	High	1.Accident	3
300	MiddleAged	Woman	Urban	Yes	High	1.Deliberate	1
300	MiddleAged	Woman	Urban	Yes	High	1.Natural	2
300	MiddleAged	Woman	Urban	Yes	High	1.Negligen	4
301	MiddleAged	Man	Urban	No	Medium	1.Accident	2
301	MiddleAged	Man	Urban	No	Medium	1.Deliberate	4
301	MiddleAged	Man	Urban	No	Medium	1.Natural	1
301	MiddleAged	Man	Urban	No	Medium	1.Negligen	3
302	MiddleAged	Woman	Urban	Yes	Medium	1.Accident	2
302	MiddleAged	Woman	Urban	Yes	Medium	1.Deliberate	4
302	MiddleAged	Woman	Urban	Yes	Medium	1.Natural	1
302	MiddleAged	Woman	Urban	Yes	Medium	1.Negligen	3
303	Senior	Woman	Urban	No	Low	1.Accident	2
303	Senior	Woman	Urban	No	Low	1.Deliberate	4
303	Senior	Woman	Urban	No	Low	1.Natural	1
303	Senior	Woman	Urban	No	Low	1.Negligen	3
304	Senior	Woman	Urban	No	Low	1.Accident	2
304	Senior	Woman	Urban	No	Low	1.Deliberate	4
304	Senior	Woman	Urban	No	Low	1.Natural	1
304	Senior	Woman	Urban	No	Low	1.Negligen	3
305	MiddleAged	Woman	Rural	Yes	Medium	1.Accident	2
305	MiddleAged	Woman	Rural	Yes	Medium	1.Deliberate	4
305	MiddleAged	Woman	Rural	Yes	Medium	1.Natural	1
305	MiddleAged	Woman	Rural	Yes	Medium	1.Negligen	3
306	Senior	Man	Rural	Yes	Medium	1.Accident	2
306	Senior	Man	Rural	Yes	Medium	1.Deliberate	4
306	Senior	Man	Rural	Yes	Medium	1.Natural	1
306	Senior	Man	Rural	Yes	Medium	1.Negligen	3
307	MiddleAged	Man	Rural	Yes	Low	1.Accident	2
307	MiddleAged	Man	Rural	Yes	Low	1.Deliberate	4
307	MiddleAged	Man	Rural	Yes	Low	1.Natural	1
307	MiddleAged	Man	Rural	Yes	Low	1.Negligen	3
308	Young	Man	Urban	Yes	High	1.Accident	2
308	Young	Man	Urban	Yes	High	1.Deliberate	3
308	Young	Man	Urban	Yes	High	1.Natural	1
308	Young	Man	Urban	Yes	High	1.Negligen	4
309	MiddleAged	Man	Rural	Yes	Medium	1.Accident	2
309	MiddleAged	Man	Rural	Yes	Medium	1.Deliberate	4
309	MiddleAged	Man	Rural	Yes	Medium	1.Natural	1
309	MiddleAged	Man	Rural	Yes	Medium	1.Negligen	3
310	MiddleAged	Woman	Rural	Yes	Medium	1.Accident	2
310	MiddleAged	Woman	Rural	Yes	Medium	1.Deliberate	4
310	MiddleAged	Woman	Rural	Yes	Medium	1.Natural	1
310	MiddleAged	Woman	Rural	Yes	Medium	1.Negligen	3
311	Young	Woman	Rural	Yes	Medium	1.Accident	3
311	Young	Woman	Rural	Yes	Medium	1.Deliberate	4
311	Young	Woman	Rural	Yes	Medium	1.Natural	2
311	Young	Woman	Rural	Yes	Medium	1.Negligen	1
312	Senior	Woman	Urban	No	Low	1.Accident	2
312	Senior	Woman	Urban	No	Low	1.Deliberate	4
312	Senior	Woman	Urban	No	Low	1.Natural	1
312	Senior	Woman	Urban	No	Low	1.Negligen	3
313	MiddleAged	Man	Urban	No	Medium	1.Accident	3
313	MiddleAged	Man	Urban	No	Medium	1.Deliberate	4
313	MiddleAged	Man	Urban	No	Medium	1.Natural	1
313	MiddleAged	Man	Urban	No	Medium	1.Negligen	2
314	MiddleAged	Man	Urban	Yes	High	1.Accident	2
314	MiddleAged	Man	Urban	Yes	High	1.Deliberate	3
314	MiddleAged	Man	Urban	Yes	High	1.Natural	1
314	MiddleAged	Man	Urban	Yes	High	1.Negligen	4
315	MiddleAged	Man	Urban	No	Medium	1.Accident	2
315	MiddleAged	Man	Urban	No	Medium	1.Deliberate	4
315	MiddleAged	Man	Urban	No	Medium	1.Natural	1
315	MiddleAged	Man	Urban	No	Medium	1.Negligen	3
316	Young	Man	Urban	Yes	High	1.Accident	2
316	Young	Man	Urban	Yes	High	1.Deliberate	3
316	Young	Man	Urban	Yes	High	1.Natural	1
316	Young	Man	Urban	Yes	High	1.Negligen	4
317	Senior	Woman	Urban	No	Medium	1.Accident	3
317	Senior	Woman	Urban	No	Medium	1.Deliberate	2
317	Senior	Woman	Urban	No	Medium	1.Natural	4
317	Senior	Woman	Urban	No	Medium	1.Negligen	1
318	MiddleAged	Woman	Urban	Yes	Medium	1.Accident	2
318	MiddleAged	Woman	Urban	Yes	Medium	1.Deliberate	4
318	MiddleAged	Woman	Urban	Yes	Medium	1.Natural	1
318	MiddleAged	Woman	Urban	Yes	Medium	1.Negligen	3
319	Senior	Man	Rural	No	Low	1.Accident	2
319	Senior	Man	Rural	No	Low	1.Deliberate	4
319	Senior	Man	Rural	No	Low	1.Natural	1
319	Senior	Man	Rural	No	Low	1.Negligen	3
320	MiddleAged	Woman	Rural	Yes	Medium	1.Accident	2
320	MiddleAged	Woman	Rural	Yes	Medium	1.Deliberate	4
320	MiddleAged	Woman	Rural	Yes	Medium	1.Natural	1
320	MiddleAged	Woman	Rural	Yes	Medium	1.Negligen	3
321	Senior	Man	Urban	No	Medium	1.Accident	3
321	Senior	Man	Urban	No	Medium	1.Deliberate	2
321	Senior	Man	Urban	No	Medium	1.Natural	4
321	Senior	Man	Urban	No	Medium	1.Negligen	1
322	Senior	Woman	Rural	No	Medium	1.Accident	2
322	Senior	Woman	Rural	No	Medium	1.Deliberate	4
322	Senior	Woman	Rural	No	Medium	1.Natural	1
322	Senior	Woman	Rural	No	Medium	1.Negligen	3
323	Senior	Woman	Rural	Yes	Low	1.Accident	2
323	Senior	Woman	Rural	Yes	Low	1.Deliberate	3
323	Senior	Woman	Rural	Yes	Low	1.Natural	1
323	Senior	Woman	Rural	Yes	Low	1.Negligen	4
324	Young	Man	Urban	No	High	1.Accident	2
324	Young	Man	Urban	No	High	1.Deliberate	4
324	Young	Man	Urban	No	High	1.Natural	1
324	Young	Man	Urban	No	High	1.Negligen	3
325	MiddleAged	Man	Urban	No	Medium	1.Accident	2
325	MiddleAged	Man	Urban	No	Medium	1.Deliberate	4
325	MiddleAged	Man	Urban	No	Medium	1.Natural	1
325	MiddleAged	Man	Urban	No	Medium	1.Negligen	3
326	Senior	Woman	Urban	No	Low	1.Accident	2
326	Senior	Woman	Urban	No	Low	1.Deliberate	4
326	Senior	Woman	Urban	No	Low	1.Natural	1
326	Senior	Woman	Urban	No	Low	1.Negligen	3
327	Senior	Woman	Rural	Yes	Low	1.Accident	3
327	Senior	Woman	Rural	Yes	Low	1.Deliberate	1
327	Senior	Woman	Rural	Yes	Low	1.Natural	2
327	Senior	Woman	Rural	Yes	Low	1.Negligen	4
328	MiddleAged	Woman	Urban	Yes	Medium	1.Accident	2
328	MiddleAged	Woman	Urban	Yes	Medium	1.Deliberate	4
328	MiddleAged	Woman	Urban	Yes	Medium	1.Natural	1
328	MiddleAged	Woman	Urban	Yes	Medium	1.Negligen	3
329	Senior	Man	Rural	Yes	Low	1.Accident	2
329	Senior	Man	Rural	Yes	Low	1.Deliberate	3
329	Senior	Man	Rural	Yes	Low	1.Natural	1
329	Senior	Man	Rural	Yes	Low	1.Negligen	4
330	MiddleAged	Woman	Urban	No	Medium	1.Accident	2
330	MiddleAged	Woman	Urban	No	Medium	1.Deliberate	3
330	MiddleAged	Woman	Urban	No	Medium	1.Natural	1
330	MiddleAged	Woman	Urban	No	Medium	1.Negligen	4
331	Young	Woman	Rural	Yes	High	1.Accident	2
331	Young	Woman	Rural	Yes	High	1.Deliberate	4
331	Young	Woman	Rural	Yes	High	1.Natural	1
331	Young	Woman	Rural	Yes	High	1.Negligen	3
332	Young	Man	Urban	Yes	High	1.Accident	2
332	Young	Man	Urban	Yes	High	1.Deliberate	4
332	Young	Man	Urban	Yes	High	1.Natural	1
332	Young	Man	Urban	Yes	High	1.Negligen	3
333	MiddleAged	Woman	Urban	No	Medium	1.Accident	2
333	MiddleAged	Woman	Urban	No	Medium	1.Deliberate	4
333	MiddleAged	Woman	Urban	No	Medium	1.Natural	1
333	MiddleAged	Woman	Urban	No	Medium	1.Negligen	3
334	Senior	Man	Rural	No	Low	1.Accident	2
334	Senior	Man	Rural	No	Low	1.Deliberate	4
334	Senior	Man	Rural	No	Low	1.Natural	1
334	Senior	Man	Rural	No	Low	1.Negligen	3
335	MiddleAged	Woman	Rural	Yes	Medium	1.Accident	2
335	MiddleAged	Woman	Rural	Yes	Medium	1.Deliberate	4
335	MiddleAged	Woman	Rural	Yes	Medium	1.Natural	1
335	MiddleAged	Woman	Rural	Yes	Medium	1.Negligen	3
336	MiddleAged	Woman	Urban	Yes	Medium	1.Accident	2
336	MiddleAged	Woman	Urban	Yes	Medium	1.Deliberate	4
336	MiddleAged	Woman	Urban	Yes	Medium	1.Natural	1
336	MiddleAged	Woman	Urban	Yes	Medium	1.Negligen	3
337	MiddleAged	Woman	Urban	No	Medium	1.Accident	3
337	MiddleAged	Woman	Urban	No	Medium	1.Deliberate	2
337	MiddleAged	Woman	Urban	No	Medium	1.Natural	1
337	MiddleAged	Woman	Urban	No	Medium	1.Negligen	4
338	Young	Man	Urban	Yes	High	1.Accident	2
338	Young	Man	Urban	Yes	High	1.Deliberate	4
338	Young	Man	Urban	Yes	High	1.Natural	1
338	Young	Man	Urban	Yes	High	1.Negligen	3
339	Senior	Woman	Rural	Yes	Low	1.Accident	2
339	Senior	Woman	Rural	Yes	Low	1.Deliberate	3
339	Senior	Woman	Rural	Yes	Low	1.Natural	1
339	Senior	Woman	Rural	Yes	Low	1.Negligen	4
340	MiddleAged	Woman	Urban	No	Medium	1.Accident	2
340	MiddleAged	Woman	Urban	No	Medium	1.Deliberate	4
340	MiddleAged	Woman	Urban	No	Medium	1.Natural	1
340	MiddleAged	Woman	Urban	No	Medium	1.Negligen	3
341	Young	Woman	Urban	Yes	High	1.Accident	2
341	Young	Woman	Urban	Yes	High	1.Deliberate	4
341	Young	Woman	Urban	Yes	High	1.Natural	1
341	Young	Woman	Urban	Yes	High	1.Negligen	3
342	Young	Man	Urban	Yes	High	1.Accident	2
342	Young	Man	Urban	Yes	High	1.Deliberate	4
342	Young	Man	Urban	Yes	High	1.Natural	1
342	Young	Man	Urban	Yes	High	1.Negligen	3
343	Senior	Woman	Rural	Yes	Medium	1.Accident	2
343	Senior	Woman	Rural	Yes	Medium	1.Deliberate	4
343	Senior	Woman	Rural	Yes	Medium	1.Natural	1
343	Senior	Woman	Rural	Yes	Medium	1.Negligen	3
344	MiddleAged	Woman	Urban	No	Medium	1.Accident	2
344	MiddleAged	Woman	Urban	No	Medium	1.Deliberate	4
344	MiddleAged	Woman	Urban	No	Medium	1.Natural	1
344	MiddleAged	Woman	Urban	No	Medium	1.Negligen	3
345	MiddleAged	Woman	Urban	Yes	High	1.Accident	2
345	MiddleAged	Woman	Urban	Yes	High	1.Deliberate	4
345	MiddleAged	Woman	Urban	Yes	High	1.Natural	1
345	MiddleAged	Woman	Urban	Yes	High	1.Negligen	3

## Sheet: Question 2
Survey Number	Age	SEX	Residence	Outdoor Activities	Educational level	Specific Cause	Score
202	Young	Woman	Urban	YES	High	2.Accidents	3
225	Young	Man	Urban	YES	High	2.Accidents	3
341	Young	Woman	Urban	YES	High	2.Accidents	3
6	Young	Woman	Urban	YES	Medium	2.Accidents	2
9	Young	Woman	Urban	YES	Medium	2.Accidents	2
10	Young	Man	Urban	YES	High	2.Accidents	2
16	Young	Woman	Urban	YES	High	2.Accidents	2
18	Young	Man	Urban	YES	Medium	2.Accidents	2
27	Young	Man	Urban	YES	High	2.Accidents	2
38	Young	Woman	Urban	YES	High	2.Accidents	2
40	Young	Woman	Urban	YES	High	2.Accidents	2
41	Young	Woman	Urban	YES	High	2.Accidents	2
47	Young	Man	Urban	YES	Medium	2.Accidents	2
72	Young	Man	Urban	NO	High	2.Accidents	2
75	Young	Woman	Urban	NO	Medium	2.Accidents	2
83	Young	Woman	Urban	YES	High	2.Accidents	2
85	Young	Woman	Urban	YES	High	2.Accidents	2
95	Young	Woman	Urban	NO	Medium	2.Accidents	2
97	Young	Woman	Urban	YES	High	2.Accidents	2
98	Young	Man	Urban	NO	Medium	2.Accidents	2
103	Young	Woman	Urban	YES	Medium	2.Accidents	2
108	Young	Man	Urban	YES	High	2.Accidents	2
114	Young	Woman	Urban	NO	Medium	2.Accidents	2
116	Young	Man	Urban	YES	High	2.Accidents	2
123	Young	Man	Urban	YES	Medium	2.Accidents	2
125	Young	Woman	Urban	YES	High	2.Accidents	2
130	Young	Woman	Urban	YES	Medium	2.Accidents	2
132	Young	Man	Urban	YES	Medium	2.Accidents	2
136	Young	Woman	Urban	YES	High	2.Accidents	2
142	Young	Woman	Urban	NO	High	2.Accidents	2
145	Young	Woman	Urban	YES	High	2.Accidents	2
152	Young	Man	Urban	YES	High	2.Accidents	2
156	Young	Man	Urban	YES	High	2.Accidents	2
167	Young	Man	Urban	NO	High	2.Accidents	2
185	Young	Man	Urban	NO	High	2.Accidents	2
190	Young	Woman	Urban	YES	High	2.Accidents	2
192	Young	Man	Urban	YES	Medium	2.Accidents	2
205	Young	Man	Urban	NO	Medium	2.Accidents	2
226	Young	Man	Urban	YES	Medium	2.Accidents	2
231	Young	Woman	Urban	YES	High	2.Accidents	2
232	Young	Man	Urban	YES	Medium	2.Accidents	2
234	Young	Woman	Urban	YES	High	2.Accidents	2
235	Young	Woman	Urban	NO	High	2.Accidents	2
243	Young	Man	Urban	YES	High	2.Accidents	2
244	Young	Man	Urban	NO	Medium	2.Accidents	2
248	Young	Woman	Urban	YES	High	2.Accidents	2
259	Young	Man	Urban	YES	High	2.Accidents	2
261	Young	Woman	Urban	NO	High	2.Accidents	2
268	Young	Woman	Urban	YES	High	2.Accidents	2
270	Young	Woman	Urban	NO	Medium	2.Accidents	2
273	Young	Woman	Urban	NO	High	2.Accidents	2
278	Young	Woman	Urban	YES	High	2.Accidents	2
280	Young	Woman	Urban	YES	Medium	2.Accidents	2
282	Young	Man	Urban	YES	High	2.Accidents	2
283	Young	Woman	Urban	YES	Medium	2.Accidents	2
288	Young	Woman	Urban	NO	High	2.Accidents	2
290	Young	Man	Urban	YES	Medium	2.Accidents	2
298	Young	Man	Urban	NO	Medium	2.Accidents	2
316	Young	Man	Urban	YES	High	2.Accidents	2
324	Young	Man	Urban	NO	High	2.Accidents	2
332	Young	Man	Urban	YES	High	2.Accidents	2
338	Young	Man	Urban	YES	High	2.Accidents	2
342	Young	Man	Urban	YES	High	2.Accidents	2
179	Young	Woman	Urban	YES	High	2.Accidents	1
279	Young	Woman	Urban	YES	Medium	2.Accidents	1
308	Young	Man	Urban	YES	High	2.Accidents	1
292	MiddleAged	Woman	Urban	NO	Low	2.Accidents	4
294	MiddleAged	Man	Urban	NO	Low	2.Accidents	4
54	MiddleAged	Woman	Urban	NO	Medium	2.Accidents	3
58	MiddleAged	Woman	Urban	YES	Low	2.Accidents	3
78	MiddleAged	Woman	Urban	NO	Medium	2.Accidents	3
79	MiddleAged	Man	Urban	NO	Medium	2.Accidents	3
81	MiddleAged	Man	Urban	NO	Low	2.Accidents	3
90	MiddleAged	Woman	Urban	NO	Medium	2.Accidents	3
100	MiddleAged	Man	Urban	NO	Medium	2.Accidents	3
124	MiddleAged	Woman	Urban	NO	Medium	2.Accidents	3
126	MiddleAged	Man	Urban	YES	Medium	2.Accidents	3
129	MiddleAged	Man	Urban	NO	High	2.Accidents	3
146	MiddleAged	Woman	Urban	NO	Medium	2.Accidents	3
157	MiddleAged	Woman	Urban	YES	Medium	2.Accidents	3
159	MiddleAged	Woman	Urban	NO	Medium	2.Accidents	3
196	MiddleAged	Woman	Urban	YES	High	2.Accidents	3
221	MiddleAged	Woman	Urban	YES	High	2.Accidents	3
222	MiddleAged	Woman	Urban	NO	High	2.Accidents	3
236	MiddleAged	Man	Urban	NO	Medium	2.Accidents	3
264	MiddleAged	Man	Urban	NO	Medium	2.Accidents	3
274	MiddleAged	Man	Urban	NO	Medium	2.Accidents	3
284	MiddleAged	Woman	Urban	NO	Medium	2.Accidents	3
291	MiddleAged	Man	Urban	NO	Medium	2.Accidents	3
297	MiddleAged	Man	Urban	YES	Medium	2.Accidents	3
300	MiddleAged	Woman	Urban	YES	High	2.Accidents	3
313	MiddleAged	Man	Urban	NO	Medium	2.Accidents	3
328	MiddleAged	Woman	Urban	YES	Medium	2.Accidents	3
330	MiddleAged	Woman	Urban	NO	Medium	2.Accidents	3
336	MiddleAged	Woman	Urban	YES	Medium	2.Accidents	3
337	MiddleAged	Woman	Urban	NO	Medium	2.Accidents	3
340	MiddleAged	Woman	Urban	NO	Medium	2.Accidents	3
1	MiddleAged	Woman	Urban	NO	Medium	2.Accidents	2
3	MiddleAged	Man	Urban	YES	Medium	2.Accidents	2
11	MiddleAged	Man	Urban	YES	Medium	2.Accidents	2
14	MiddleAged	Woman	Urban	YES	Medium	2.Accidents	2
15	MiddleAged	Woman	Urban	YES	Medium	2.Accidents	2
20	MiddleAged	Woman	Urban	NO	Medium	2.Accidents	2
21	MiddleAged	Man	Urban	NO	High	2.Accidents	2
23	MiddleAged	Man	Urban	YES	Medium	2.Accidents	2
24	MiddleAged	Woman	Urban	YES	Medium	2.Accidents	2
25	MiddleAged	Man	Urban	NO	Medium	2.Accidents	2
26	MiddleAged	Woman	Urban	NO	Low	2.Accidents	2
31	MiddleAged	Woman	Urban	NO	Medium	2.Accidents	2
36	MiddleAged	Woman	Urban	YES	Medium	2.Accidents	2
37	MiddleAged	Man	Urban	NO	Medium	2.Accidents	2
46	MiddleAged	Woman	Urban	YES	Medium	2.Accidents	2
55	MiddleAged	Man	Urban	NO	Medium	2.Accidents	2
63	MiddleAged	Man	Urban	YES	High	2.Accidents	2
65	MiddleAged	Woman	Urban	NO	Medium	2.Accidents	2
66	MiddleAged	Woman	Urban	NO	High	2.Accidents	2
68	MiddleAged	Woman	Urban	NO	Medium	2.Accidents	2
70	MiddleAged	Woman	Urban	NO	Medium	2.Accidents	2
73	MiddleAged	Man	Urban	YES	Medium	2.Accidents	2
74	MiddleAged	Woman	Urban	YES	Medium	2.Accidents	2
76	MiddleAged	Woman	Urban	NO	Medium	2.Accidents	2
82	MiddleAged	Man	Urban	YES	Medium	2.Accidents	2
88	MiddleAged	Woman	Urban	YES	High	2.Accidents	2
92	MiddleAged	Man	Urban	YES	Medium	2.Accidents	2
94	MiddleAged	Man	Urban	NO	Low	2.Accidents	2
96	MiddleAged	Woman	Urban	NO	Medium	2.Accidents	2
104	MiddleAged	Man	Urban	YES	High	2.Accidents	2
106	MiddleAged	Man	Urban	NO	Medium	2.Accidents	2
110	MiddleAged	Woman	Urban	YES	High	2.Accidents	2
115	MiddleAged	Woman	Urban	NO	High	2.Accidents	2
117	MiddleAged	Man	Urban	NO	Medium	2.Accidents	2
118	MiddleAged	Man	Urban	NO	High	2.Accidents	2
119	MiddleAged	Woman	Urban	NO	Medium	2.Accidents	2
121	MiddleAged	Woman	Urban	NO	Medium	2.Accidents	2
128	MiddleAged	Man	Urban	NO	High	2.Accidents	2
134	MiddleAged	Woman	Urban	YES	Medium	2.Accidents	2
137	MiddleAged	Woman	Urban	YES	High	2.Accidents	2
141	MiddleAged	Woman	Urban	NO	High	2.Accidents	2
143	MiddleAged	Man	Urban	NO	Medium	2.Accidents	2
147	MiddleAged	Man	Urban	NO	High	2.Accidents	2
149	MiddleAged	Woman	Urban	NO	Medium	2.Accidents	2
150	MiddleAged	Woman	Urban	NO	High	2.Accidents	2
151	MiddleAged	Woman	Urban	NO	Medium	2.Accidents	2
155	MiddleAged	Man	Urban	YES	Medium	2.Accidents	2
160	MiddleAged	Man	Urban	NO	Medium	2.Accidents	2
162	MiddleAged	Woman	Urban	NO	Medium	2.Accidents	2
168	MiddleAged	Woman	Urban	NO	Medium	2.Accidents	2
169	MiddleAged	Woman	Urban	NO	Medium	2.Accidents	2
170	MiddleAged	Woman	Urban	YES	Medium	2.Accidents	2
172	MiddleAged	Woman	Urban	YES	Medium	2.Accidents	2
175	MiddleAged	Woman	Urban	NO	Medium	2.Accidents	2
177	MiddleAged	Man	Urban	NO	Medium	2.Accidents	2
182	MiddleAged	Man	Urban	NO	Medium	2.Accidents	2
184	MiddleAged	Man	Urban	NO	Medium	2.Accidents	2
189	MiddleAged	Man	Urban	YES	High	2.Accidents	2
191	MiddleAged	Woman	Urban	YES	Medium	2.Accidents	2
193	MiddleAged	Man	Urban	NO	Low	2.Accidents	2
195	MiddleAged	Woman	Urban	NO	Medium	2.Accidents	2
198	MiddleAged	Man	Urban	YES	Medium	2.Accidents	2
206	MiddleAged	Woman	Urban	NO	Medium	2.Accidents	2
208	MiddleAged	Man	Urban	YES	High	2.Accidents	2
210	MiddleAged	Man	Urban	YES	High	2.Accidents	2
211	MiddleAged	Woman	Urban	YES	High	2.Accidents	2
212	MiddleAged	Woman	Urban	NO	Medium	2.Accidents	2
214	MiddleAged	Man	Urban	NO	Medium	2.Accidents	2
216	MiddleAged	Woman	Urban	NO	Medium	2.Accidents	2
217	MiddleAged	Man	Urban	YES	Medium	2.Accidents	2
223	MiddleAged	Man	Urban	NO	Medium	2.Accidents	2
224	MiddleAged	Woman	Urban	NO	Low	2.Accidents	2
228	MiddleAged	Woman	Urban	YES	Low	2.Accidents	2
230	MiddleAged	Woman	Urban	NO	Medium	2.Accidents	2
237	MiddleAged	Woman	Urban	NO	Medium	2.Accidents	2
238	MiddleAged	Woman	Urban	NO	High	2.Accidents	2
239	MiddleAged	Man	Urban	NO	Medium	2.Accidents	2
245	MiddleAged	Woman	Urban	YES	Medium	2.Accidents	2
247	MiddleAged	Woman	Urban	NO	High	2.Accidents	2
249	MiddleAged	Man	Urban	YES	Medium	2.Accidents	2
250	MiddleAged	Man	Urban	NO	Medium	2.Accidents	2
251	MiddleAged	Woman	Urban	NO	Medium	2.Accidents	2
254	MiddleAged	Woman	Urban	NO	Medium	2.Accidents	2
255	MiddleAged	Man	Urban	YES	Medium	2.Accidents	2
257	MiddleAged	Woman	Urban	NO	Medium	2.Accidents	2
263	MiddleAged	Woman	Urban	NO	Low	2.Accidents	2
265	MiddleAged	Woman	Urban	NO	Low	2.Accidents	2
267	MiddleAged	Man	Urban	NO	Medium	2.Accidents	2
287	MiddleAged	Man	Urban	NO	Low	2.Accidents	2
299	MiddleAged	Man	Urban	YES	High	2.Accidents	2
301	MiddleAged	Man	Urban	NO	Medium	2.Accidents	2
302	MiddleAged	Woman	Urban	YES	Medium	2.Accidents	2
314	MiddleAged	Man	Urban	YES	High	2.Accidents	2
315	MiddleAged	Man	Urban	NO	Medium	2.Accidents	2
318	MiddleAged	Woman	Urban	YES	Medium	2.Accidents	2
333	MiddleAged	Woman	Urban	NO	Medium	2.Accidents	2
344	MiddleAged	Woman	Urban	NO	Medium	2.Accidents	2
345	MiddleAged	Woman	Urban	YES	High	2.Accidents	2
35	MiddleAged	Woman	Urban	YES	Medium	2.Accidents	1
42	MiddleAged	Man	Urban	YES	Medium	2.Accidents	1
45	MiddleAged	Woman	Urban	YES	Low	2.Accidents	1
67	MiddleAged	Man	Urban	YES	Low	2.Accidents	1
188	MiddleAged	Man	Urban	YES	Medium	2.Accidents	1
325	MiddleAged	Man	Urban	NO	Medium	2.Accidents	1
59	Senior	Woman	Urban	NO	Low	2.Accidents	3
84	Senior	Man	Urban	NO	Medium	2.Accidents	3
86	Senior	Man	Urban	NO	High	2.Accidents	3
112	Senior	Man	Urban	NO	Low	2.Accidents	3
176	Senior	Woman	Urban	NO	Low	2.Accidents	3
178	Senior	Woman	Urban	NO	Low	2.Accidents	3
181	Senior	Man	Urban	NO	Medium	2.Accidents	3
266	Senior	Woman	Urban	NO	Low	2.Accidents	3
271	Senior	Woman	Urban	NO	Low	2.Accidents	3
303	Senior	Woman	Urban	NO	Low	2.Accidents	3
317	Senior	Woman	Urban	NO	Medium	2.Accidents	3
321	Senior	Man	Urban	NO	Medium	2.Accidents	3
8	Senior	Man	Urban	NO	Low	2.Accidents	2
22	Senior	Man	Urban	NO	Low	2.Accidents	2
30	Senior	Woman	Urban	NO	Low	2.Accidents	2
49	Senior	Woman	Urban	NO	Medium	2.Accidents	2
60	Senior	Woman	Urban	NO	Medium	2.Accidents	2
61	Senior	Man	Urban	NO	Low	2.Accidents	2
71	Senior	Man	Urban	NO	Low	2.Accidents	2
91	Senior	Man	Urban	NO	Low	2.Accidents	2
99	Senior	Man	Urban	NO	Low	2.Accidents	2
102	Senior	Woman	Urban	YES	Medium	2.Accidents	2
113	Senior	Woman	Urban	NO	Medium	2.Accidents	2
122	Senior	Man	Urban	NO	Low	2.Accidents	2
135	Senior	Man	Urban	YES	Medium	2.Accidents	2
139	Senior	Man	Urban	NO	Medium	2.Accidents	2
158	Senior	Man	Urban	NO	Low	2.Accidents	2
166	Senior	Woman	Urban	NO	Low	2.Accidents	2
171	Senior	Man	Urban	NO	Low	2.Accidents	2
183	Senior	Woman	Urban	NO	Low	2.Accidents	2
194	Senior	Woman	Urban	NO	Low	2.Accidents	2
201	Senior	Woman	Urban	YES	Medium	2.Accidents	2
207	Senior	Woman	Urban	NO	Low	2.Accidents	2
229	Senior	Man	Urban	YES	Low	2.Accidents	2
252	Senior	Woman	Urban	YES	Medium	2.Accidents	2
253	Senior	Man	Urban	NO	Low	2.Accidents	2
256	Senior	Woman	Urban	YES	Low	2.Accidents	2
269	Senior	Woman	Urban	YES	High	2.Accidents	2
272	Senior	Woman	Urban	YES	High	2.Accidents	2
304	Senior	Woman	Urban	NO	Low	2.Accidents	2
312	Senior	Woman	Urban	NO	Low	2.Accidents	2
326	Senior	Woman	Urban	NO	Low	2.Accidents	2
163	Senior	Woman	Urban	NO	Medium	2.Accidents	1
187	Senior	Woman	Urban	NO	Medium	2.Accidents	1
295	Senior	Woman	Urban	YES	Medium	2.Accidents	1
28	Young	Man	Rural	YES	Medium	2.Accidents	3
311	Young	Woman	Rural	YES	Medium	2.Accidents	3
19	Young	Woman	Rural	YES	High	2.Accidents	2
29	Young	Woman	Rural	YES	High	2.Accidents	2
56	Young	Man	Rural	YES	High	2.Accidents	2
89	Young	Woman	Rural	NO	Medium	2.Accidents	2
199	Young	Woman	Rural	YES	Medium	2.Accidents	2
331	Young	Woman	Rural	YES	High	2.Accidents	2
57	MiddleAged	Man	Rural	NO	Medium	2.Accidents	4
111	MiddleAged	Woman	Rural	YES	Medium	2.Accidents	3
197	MiddleAged	Man	Rural	YES	Medium	2.Accidents	3
204	MiddleAged	Woman	Rural	YES	Medium	2.Accidents	3
307	MiddleAged	Man	Rural	YES	Low	2.Accidents	3
4	MiddleAged	Man	Rural	YES	High	2.Accidents	2
43	MiddleAged	Man	Rural	NO	Medium	2.Accidents	2
48	MiddleAged	Man	Rural	NO	Medium	2.Accidents	2
64	MiddleAged	Woman	Rural	YES	Medium	2.Accidents	2
69	MiddleAged	Woman	Rural	YES	Low	2.Accidents	2
107	MiddleAged	Man	Rural	YES	High	2.Accidents	2
140	MiddleAged	Man	Rural	YES	Medium	2.Accidents	2
144	MiddleAged	Man	Rural	YES	High	2.Accidents	2
161	MiddleAged	Woman	Rural	YES	Medium	2.Accidents	2
186	MiddleAged	Woman	Rural	YES	Medium	2.Accidents	2
218	MiddleAged	Woman	Rural	YES	Medium	2.Accidents	2
285	MiddleAged	Woman	Rural	YES	Medium	2.Accidents	2
305	MiddleAged	Woman	Rural	YES	Medium	2.Accidents	2
310	MiddleAged	Woman	Rural	YES	Medium	2.Accidents	2
320	MiddleAged	Woman	Rural	YES	Medium	2.Accidents	2
335	MiddleAged	Woman	Rural	YES	Medium	2.Accidents	2
39	MiddleAged	Man	Rural	NO	Medium	2.Accidents	1
309	MiddleAged	Man	Rural	YES	Medium	2.Accidents	1
12	Senior	Man	Rural	YES	Low	2.Accidents	3
13	Senior	Woman	Rural	YES	Low	2.Accidents	3
32	Senior	Woman	Rural	NO	Medium	2.Accidents	3
33	Senior	Man	Rural	NO	Low	2.Accidents	3
53	Senior	Woman	Rural	YES	High	2.Accidents	3
101	Senior	Man	Rural	NO	Medium	2.Accidents	3
105	Senior	Woman	Rural	YES	Medium	2.Accidents	3
127	Senior	Woman	Rural	YES	Medium	2.Accidents	3
138	Senior	Woman	Rural	YES	Medium	2.Accidents	3
153	Senior	Woman	Rural	NO	Low	2.Accidents	3
173	Senior	Man	Rural	NO	Low	2.Accidents	3
174	Senior	Man	Rural	YES	Low	2.Accidents	3
200	Senior	Man	Rural	YES	Low	2.Accidents	3
219	Senior	Man	Rural	NO	Low	2.Accidents	3
227	Senior	Woman	Rural	YES	Medium	2.Accidents	3
262	Senior	Man	Rural	YES	Low	2.Accidents	3
281	Senior	Man	Rural	YES	Low	2.Accidents	3
286	Senior	Man	Rural	YES	Low	2.Accidents	3
293	Senior	Woman	Rural	YES	Low	2.Accidents	3
306	Senior	Man	Rural	YES	Medium	2.Accidents	3
322	Senior	Woman	Rural	NO	Medium	2.Accidents	3
327	Senior	Woman	Rural	YES	Low	2.Accidents	3
334	Senior	Man	Rural	NO	Low	2.Accidents	3
2	Senior	Woman	Rural	YES	Low	2.Accidents	2
5	Senior	Woman	Rural	NO	Low	2.Accidents	2
7	Senior	Woman	Rural	NO	Low	2.Accidents	2
17	Senior	Woman	Rural	NO	Medium	2.Accidents	2
34	Senior	Man	Rural	YES	Low	2.Accidents	2
50	Senior	Woman	Rural	NO	Low	2.Accidents	2
51	Senior	Man	Rural	NO	Low	2.Accidents	2
52	Senior	Woman	Rural	NO	Low	2.Accidents	2
62	Senior	Man	Rural	NO	Low	2.Accidents	2
77	Senior	Man	Rural	YES	Low	2.Accidents	2
80	Senior	Woman	Rural	YES	Low	2.Accidents	2
87	Senior	Man	Rural	NO	Low	2.Accidents	2
93	Senior	Woman	Rural	YES	Low	2.Accidents	2
109	Senior	Woman	Rural	YES	Low	2.Accidents	2
120	Senior	Man	Rural	NO	Low	2.Accidents	2
131	Senior	Woman	Rural	NO	Low	2.Accidents	2
133	Senior	Man	Rural	YES	Low	2.Accidents	2
148	Senior	Man	Rural	YES	Low	2.Accidents	2
154	Senior	Man	Rural	YES	Low	2.Accidents	2
164	Senior	Woman	Rural	NO	Low	2.Accidents	2
165	Senior	Man	Rural	NO	Low	2.Accidents	2
180	Senior	Woman	Rural	YES	Low	2.Accidents	2
203	Senior	Man	Rural	YES	Medium	2.Accidents	2
209	Senior	Man	Rural	YES	Medium	2.Accidents	2
213	Senior	Woman	Rural	YES	Low	2.Accidents	2
215	Senior	Woman	Rural	YES	Low	2.Accidents	2
220	Senior	Woman	Rural	YES	Medium	2.Accidents	2
233	Senior	Woman	Rural	YES	Low	2.Accidents	2
240	Senior	Woman	Rural	YES	Low	2.Accidents	2
241	Senior	Woman	Rural	NO	Low	2.Accidents	2
242	Senior	Woman	Rural	NO	Low	2.Accidents	2
246	Senior	Woman	Rural	NO	Medium	2.Accidents	2
258	Senior	Man	Rural	YES	Low	2.Accidents	2
260	Senior	Woman	Rural	NO	Low	2.Accidents	2
275	Senior	Woman	Rural	YES	Low	2.Accidents	2
276	Senior	Man	Rural	YES	Low	2.Accidents	2
277	Senior	Man	Rural	YES	Medium	2.Accidents	2
289	Senior	Woman	Rural	YES	Low	2.Accidents	2
296	Senior	Woman	Rural	YES	Medium	2.Accidents	2
319	Senior	Man	Rural	NO	Low	2.Accidents	2
323	Senior	Woman	Rural	YES	Low	2.Accidents	2
329	Senior	Man	Rural	YES	Low	2.Accidents	2
339	Senior	Woman	Rural	YES	Low	2.Accidents	2
343	Senior	Woman	Rural	YES	Medium	2.Accidents	2
44	Senior	Woman	Rural	YES	Low	2.Accidents	1
6	Young	Woman	Urban	YES	Medium	2.Profit	4
10	Young	Man	Urban	YES	High	2.Profit	4
72	Young	Man	Urban	NO	High	2.Profit	4
75	Young	Woman	Urban	NO	Medium	2.Profit	4
85	Young	Woman	Urban	YES	High	2.Profit	4
103	Young	Woman	Urban	YES	Medium	2.Profit	4
116	Young	Man	Urban	YES	High	2.Profit	4
123	Young	Man	Urban	YES	Medium	2.Profit	4
130	Young	Woman	Urban	YES	Medium	2.Profit	4
132	Young	Man	Urban	YES	Medium	2.Profit	4
136	Young	Woman	Urban	YES	High	2.Profit	4
142	Young	Woman	Urban	NO	High	2.Profit	4
145	Young	Woman	Urban	YES	High	2.Profit	4
152	Young	Man	Urban	YES	High	2.Profit	4
156	Young	Man	Urban	YES	High	2.Profit	4
179	Young	Woman	Urban	YES	High	2.Profit	4
205	Young	Man	Urban	NO	Medium	2.Profit	4
226	Young	Man	Urban	YES	Medium	2.Profit	4
231	Young	Woman	Urban	YES	High	2.Profit	4
235	Young	Woman	Urban	NO	High	2.Profit	4
243	Young	Man	Urban	YES	High	2.Profit	4
244	Young	Man	Urban	NO	Medium	2.Profit	4
248	Young	Woman	Urban	YES	High	2.Profit	4
261	Young	Woman	Urban	NO	High	2.Profit	4
268	Young	Woman	Urban	YES	High	2.Profit	4
270	Young	Woman	Urban	NO	Medium	2.Profit	4
282	Young	Man	Urban	YES	High	2.Profit	4
288	Young	Woman	Urban	NO	High	2.Profit	4
290	Young	Man	Urban	YES	Medium	2.Profit	4
308	Young	Man	Urban	YES	High	2.Profit	4
316	Young	Man	Urban	YES	High	2.Profit	4
324	Young	Man	Urban	NO	High	2.Profit	4
332	Young	Man	Urban	YES	High	2.Profit	4
338	Young	Man	Urban	YES	High	2.Profit	4
341	Young	Woman	Urban	YES	High	2.Profit	4
342	Young	Man	Urban	YES	High	2.Profit	4
9	Young	Woman	Urban	YES	Medium	2.Profit	3
18	Young	Man	Urban	YES	Medium	2.Profit	3
38	Young	Woman	Urban	YES	High	2.Profit	3
40	Young	Woman	Urban	YES	High	2.Profit	3
83	Young	Woman	Urban	YES	High	2.Profit	3
95	Young	Woman	Urban	NO	Medium	2.Profit	3
97	Young	Woman	Urban	YES	High	2.Profit	3
108	Young	Man	Urban	YES	High	2.Profit	3
125	Young	Woman	Urban	YES	High	2.Profit	3
167	Young	Man	Urban	NO	High	2.Profit	3
192	Young	Man	Urban	YES	Medium	2.Profit	3
202	Young	Woman	Urban	YES	High	2.Profit	3
232	Young	Man	Urban	YES	Medium	2.Profit	3
234	Young	Woman	Urban	YES	High	2.Profit	3
259	Young	Man	Urban	YES	High	2.Profit	3
278	Young	Woman	Urban	YES	High	2.Profit	3
283	Young	Woman	Urban	YES	Medium	2.Profit	3
298	Young	Man	Urban	NO	Medium	2.Profit	3
16	Young	Woman	Urban	YES	High	2.Profit	2
27	Young	Man	Urban	YES	High	2.Profit	2
41	Young	Woman	Urban	YES	High	2.Profit	2
47	Young	Man	Urban	YES	Medium	2.Profit	2
98	Young	Man	Urban	NO	Medium	2.Profit	2
114	Young	Woman	Urban	NO	Medium	2.Profit	2
185	Young	Man	Urban	NO	High	2.Profit	2
190	Young	Woman	Urban	YES	High	2.Profit	2
225	Young	Man	Urban	YES	High	2.Profit	2
273	Young	Woman	Urban	NO	High	2.Profit	2
279	Young	Woman	Urban	YES	Medium	2.Profit	2
280	Young	Woman	Urban	YES	Medium	2.Profit	2
15	MiddleAged	Woman	Urban	YES	Medium	2.Profit	4
24	MiddleAged	Woman	Urban	YES	Medium	2.Profit	4
35	MiddleAged	Woman	Urban	YES	Medium	2.Profit	4
54	MiddleAged	Woman	Urban	NO	Medium	2.Profit	4
63	MiddleAged	Man	Urban	YES	High	2.Profit	4
65	MiddleAged	Woman	Urban	NO	Medium	2.Profit	4
74	MiddleAged	Woman	Urban	YES	Medium	2.Profit	4
76	MiddleAged	Woman	Urban	NO	Medium	2.Profit	4
78	MiddleAged	Woman	Urban	NO	Medium	2.Profit	4
81	MiddleAged	Man	Urban	NO	Low	2.Profit	4
82	MiddleAged	Man	Urban	YES	Medium	2.Profit	4
90	MiddleAged	Woman	Urban	NO	Medium	2.Profit	4
100	MiddleAged	Man	Urban	NO	Medium	2.Profit	4
124	MiddleAged	Woman	Urban	NO	Medium	2.Profit	4
128	MiddleAged	Man	Urban	NO	High	2.Profit	4
147	MiddleAged	Man	Urban	NO	High	2.Profit	4
149	MiddleAged	Woman	Urban	NO	Medium	2.Profit	4
155	MiddleAged	Man	Urban	YES	Medium	2.Profit	4
159	MiddleAged	Woman	Urban	NO	Medium	2.Profit	4
160	MiddleAged	Man	Urban	NO	Medium	2.Profit	4
162	MiddleAged	Woman	Urban	NO	Medium	2.Profit	4
169	MiddleAged	Woman	Urban	NO	Medium	2.Profit	4
195	MiddleAged	Woman	Urban	NO	Medium	2.Profit	4
198	MiddleAged	Man	Urban	YES	Medium	2.Profit	4
208	MiddleAged	Man	Urban	YES	High	2.Profit	4
210	MiddleAged	Man	Urban	YES	High	2.Profit	4
214	MiddleAged	Man	Urban	NO	Medium	2.Profit	4
221	MiddleAged	Woman	Urban	YES	High	2.Profit	4
222	MiddleAged	Woman	Urban	NO	High	2.Profit	4
223	MiddleAged	Man	Urban	NO	Medium	2.Profit	4
228	MiddleAged	Woman	Urban	YES	Low	2.Profit	4
230	MiddleAged	Woman	Urban	NO	Medium	2.Profit	4
236	MiddleAged	Man	Urban	NO	Medium	2.Profit	4
237	MiddleAged	Woman	Urban	NO	Medium	2.Profit	4
255	MiddleAged	Man	Urban	YES	Medium	2.Profit	4
264	MiddleAged	Man	Urban	NO	Medium	2.Profit	4
267	MiddleAged	Man	Urban	NO	Medium	2.Profit	4
274	MiddleAged	Man	Urban	NO	Medium	2.Profit	4
291	MiddleAged	Man	Urban	NO	Medium	2.Profit	4
294	MiddleAged	Man	Urban	NO	Low	2.Profit	4
302	MiddleAged	Woman	Urban	YES	Medium	2.Profit	4
315	MiddleAged	Man	Urban	NO	Medium	2.Profit	4
328	MiddleAged	Woman	Urban	YES	Medium	2.Profit	4
330	MiddleAged	Woman	Urban	NO	Medium	2.Profit	4
333	MiddleAged	Woman	Urban	NO	Medium	2.Profit	4
336	MiddleAged	Woman	Urban	YES	Medium	2.Profit	4
340	MiddleAged	Woman	Urban	NO	Medium	2.Profit	4
345	MiddleAged	Woman	Urban	YES	High	2.Profit	4
1	MiddleAged	Woman	Urban	NO	Medium	2.Profit	3
3	MiddleAged	Man	Urban	YES	Medium	2.Profit	3
14	MiddleAged	Woman	Urban	YES	Medium	2.Profit	3
20	MiddleAged	Woman	Urban	NO	Medium	2.Profit	3
23	MiddleAged	Man	Urban	YES	Medium	2.Profit	3
25	MiddleAged	Man	Urban	NO	Medium	2.Profit	3
31	MiddleAged	Woman	Urban	NO	Medium	2.Profit	3
36	MiddleAged	Woman	Urban	YES	Medium	2.Profit	3
42	MiddleAged	Man	Urban	YES	Medium	2.Profit	3
45	MiddleAged	Woman	Urban	YES	Low	2.Profit	3
46	MiddleAged	Woman	Urban	YES	Medium	2.Profit	3
55	MiddleAged	Man	Urban	NO	Medium	2.Profit	3
58	MiddleAged	Woman	Urban	YES	Low	2.Profit	3
66	MiddleAged	Woman	Urban	NO	High	2.Profit	3
68	MiddleAged	Woman	Urban	NO	Medium	2.Profit	3
70	MiddleAged	Woman	Urban	NO	Medium	2.Profit	3
73	MiddleAged	Man	Urban	YES	Medium	2.Profit	3
79	MiddleAged	Man	Urban	NO	Medium	2.Profit	3
88	MiddleAged	Woman	Urban	YES	High	2.Profit	3
92	MiddleAged	Man	Urban	YES	Medium	2.Profit	3
94	MiddleAged	Man	Urban	NO	Low	2.Profit	3
96	MiddleAged	Woman	Urban	NO	Medium	2.Profit	3
104	MiddleAged	Man	Urban	YES	High	2.Profit	3
115	MiddleAged	Woman	Urban	NO	High	2.Profit	3
121	MiddleAged	Woman	Urban	NO	Medium	2.Profit	3
126	MiddleAged	Man	Urban	YES	Medium	2.Profit	3
129	MiddleAged	Man	Urban	NO	High	2.Profit	3
137	MiddleAged	Woman	Urban	YES	High	2.Profit	3
141	MiddleAged	Woman	Urban	NO	High	2.Profit	3
143	MiddleAged	Man	Urban	NO	Medium	2.Profit	3
146	MiddleAged	Woman	Urban	NO	Medium	2.Profit	3
150	MiddleAged	Woman	Urban	NO	High	2.Profit	3
151	MiddleAged	Woman	Urban	NO	Medium	2.Profit	3
175	MiddleAged	Woman	Urban	NO	Medium	2.Profit	3
177	MiddleAged	Man	Urban	NO	Medium	2.Profit	3
182	MiddleAged	Man	Urban	NO	Medium	2.Profit	3
184	MiddleAged	Man	Urban	NO	Medium	2.Profit	3
188	MiddleAged	Man	Urban	YES	Medium	2.Profit	3
193	MiddleAged	Man	Urban	NO	Low	2.Profit	3
196	MiddleAged	Woman	Urban	YES	High	2.Profit	3
206	MiddleAged	Woman	Urban	NO	Medium	2.Profit	3
211	MiddleAged	Woman	Urban	YES	High	2.Profit	3
212	MiddleAged	Woman	Urban	NO	Medium	2.Profit	3
216	MiddleAged	Woman	Urban	NO	Medium	2.Profit	3
217	MiddleAged	Man	Urban	YES	Medium	2.Profit	3
238	MiddleAged	Woman	Urban	NO	High	2.Profit	3
247	MiddleAged	Woman	Urban	NO	High	2.Profit	3
249	MiddleAged	Man	Urban	YES	Medium	2.Profit	3
250	MiddleAged	Man	Urban	NO	Medium	2.Profit	3
265	MiddleAged	Woman	Urban	NO	Low	2.Profit	3
284	MiddleAged	Woman	Urban	NO	Medium	2.Profit	3
287	MiddleAged	Man	Urban	NO	Low	2.Profit	3
292	MiddleAged	Woman	Urban	NO	Low	2.Profit	3
297	MiddleAged	Man	Urban	YES	Medium	2.Profit	3
299	MiddleAged	Man	Urban	YES	High	2.Profit	3
300	MiddleAged	Woman	Urban	YES	High	2.Profit	3
301	MiddleAged	Man	Urban	NO	Medium	2.Profit	3
313	MiddleAged	Man	Urban	NO	Medium	2.Profit	3
318	MiddleAged	Woman	Urban	YES	Medium	2.Profit	3
325	MiddleAged	Man	Urban	NO	Medium	2.Profit	3
337	MiddleAged	Woman	Urban	NO	Medium	2.Profit	3
344	MiddleAged	Woman	Urban	NO	Medium	2.Profit	3
11	MiddleAged	Man	Urban	YES	Medium	2.Profit	2
21	MiddleAged	Man	Urban	NO	High	2.Profit	2
26	MiddleAged	Woman	Urban	NO	Low	2.Profit	2
37	MiddleAged	Man	Urban	NO	Medium	2.Profit	2
67	MiddleAged	Man	Urban	YES	Low	2.Profit	2
106	MiddleAged	Man	Urban	NO	Medium	2.Profit	2
110	MiddleAged	Woman	Urban	YES	High	2.Profit	2
117	MiddleAged	Man	Urban	NO	Medium	2.Profit	2
118	MiddleAged	Man	Urban	NO	High	2.Profit	2
119	MiddleAged	Woman	Urban	NO	Medium	2.Profit	2
134	MiddleAged	Woman	Urban	YES	Medium	2.Profit	2
168	MiddleAged	Woman	Urban	NO	Medium	2.Profit	2
170	MiddleAged	Woman	Urban	YES	Medium	2.Profit	2
172	MiddleAged	Woman	Urban	YES	Medium	2.Profit	2
189	MiddleAged	Man	Urban	YES	High	2.Profit	2
191	MiddleAged	Woman	Urban	YES	Medium	2.Profit	2
224	MiddleAged	Woman	Urban	NO	Low	2.Profit	2
239	MiddleAged	Man	Urban	NO	Medium	2.Profit	2
245	MiddleAged	Woman	Urban	YES	Medium	2.Profit	2
251	MiddleAged	Woman	Urban	NO	Medium	2.Profit	2
254	MiddleAged	Woman	Urban	NO	Medium	2.Profit	2
257	MiddleAged	Woman	Urban	NO	Medium	2.Profit	2
263	MiddleAged	Woman	Urban	NO	Low	2.Profit	2
314	MiddleAged	Man	Urban	YES	High	2.Profit	2
157	MiddleAged	Woman	Urban	YES	Medium	2.Profit	1
59	Senior	Woman	Urban	NO	Low	2.Profit	4
60	Senior	Woman	Urban	NO	Medium	2.Profit	4
71	Senior	Man	Urban	NO	Low	2.Profit	4
99	Senior	Man	Urban	NO	Low	2.Profit	4
183	Senior	Woman	Urban	NO	Low	2.Profit	4
194	Senior	Woman	Urban	NO	Low	2.Profit	4
229	Senior	Man	Urban	YES	Low	2.Profit	4
252	Senior	Woman	Urban	YES	Medium	2.Profit	4
266	Senior	Woman	Urban	NO	Low	2.Profit	4
272	Senior	Woman	Urban	YES	High	2.Profit	4
304	Senior	Woman	Urban	NO	Low	2.Profit	4
326	Senior	Woman	Urban	NO	Low	2.Profit	4
8	Senior	Man	Urban	NO	Low	2.Profit	3
22	Senior	Man	Urban	NO	Low	2.Profit	3
30	Senior	Woman	Urban	NO	Low	2.Profit	3
49	Senior	Woman	Urban	NO	Medium	2.Profit	3
61	Senior	Man	Urban	NO	Low	2.Profit	3
135	Senior	Man	Urban	YES	Medium	2.Profit	3
139	Senior	Man	Urban	NO	Medium	2.Profit	3
158	Senior	Man	Urban	NO	Low	2.Profit	3
166	Senior	Woman	Urban	NO	Low	2.Profit	3
171	Senior	Man	Urban	NO	Low	2.Profit	3
187	Senior	Woman	Urban	NO	Medium	2.Profit	3
201	Senior	Woman	Urban	YES	Medium	2.Profit	3
253	Senior	Man	Urban	NO	Low	2.Profit	3
312	Senior	Woman	Urban	NO	Low	2.Profit	3
84	Senior	Man	Urban	NO	Medium	2.Profit	2
86	Senior	Man	Urban	NO	High	2.Profit	2
91	Senior	Man	Urban	NO	Low	2.Profit	2
102	Senior	Woman	Urban	YES	Medium	2.Profit	2
112	Senior	Man	Urban	NO	Low	2.Profit	2
113	Senior	Woman	Urban	NO	Medium	2.Profit	2
122	Senior	Man	Urban	NO	Low	2.Profit	2
163	Senior	Woman	Urban	NO	Medium	2.Profit	2
176	Senior	Woman	Urban	NO	Low	2.Profit	2
178	Senior	Woman	Urban	NO	Low	2.Profit	2
181	Senior	Man	Urban	NO	Medium	2.Profit	2
207	Senior	Woman	Urban	NO	Low	2.Profit	2
256	Senior	Woman	Urban	YES	Low	2.Profit	2
269	Senior	Woman	Urban	YES	High	2.Profit	2
271	Senior	Woman	Urban	NO	Low	2.Profit	2
295	Senior	Woman	Urban	YES	Medium	2.Profit	2
303	Senior	Woman	Urban	NO	Low	2.Profit	2
317	Senior	Woman	Urban	NO	Medium	2.Profit	2
321	Senior	Man	Urban	NO	Medium	2.Profit	2
19	Young	Woman	Rural	YES	High	2.Profit	4
28	Young	Man	Rural	YES	Medium	2.Profit	4
29	Young	Woman	Rural	YES	High	2.Profit	3
89	Young	Woman	Rural	NO	Medium	2.Profit	3
331	Young	Woman	Rural	YES	High	2.Profit	3
56	Young	Man	Rural	YES	High	2.Profit	2
199	Young	Woman	Rural	YES	Medium	2.Profit	2
311	Young	Woman	Rural	YES	Medium	2.Profit	2
4	MiddleAged	Man	Rural	YES	High	2.Profit	4
64	MiddleAged	Woman	Rural	YES	Medium	2.Profit	4
111	MiddleAged	Woman	Rural	YES	Medium	2.Profit	4
204	MiddleAged	Woman	Rural	YES	Medium	2.Profit	4
307	MiddleAged	Man	Rural	YES	Low	2.Profit	4
309	MiddleAged	Man	Rural	YES	Medium	2.Profit	4
69	MiddleAged	Woman	Rural	YES	Low	2.Profit	3
107	MiddleAged	Man	Rural	YES	High	2.Profit	3
144	MiddleAged	Man	Rural	YES	High	2.Profit	3
161	MiddleAged	Woman	Rural	YES	Medium	2.Profit	3
186	MiddleAged	Woman	Rural	YES	Medium	2.Profit	3
197	MiddleAged	Man	Rural	YES	Medium	2.Profit	3
285	MiddleAged	Woman	Rural	YES	Medium	2.Profit	3
305	MiddleAged	Woman	Rural	YES	Medium	2.Profit	3
320	MiddleAged	Woman	Rural	YES	Medium	2.Profit	3
335	MiddleAged	Woman	Rural	YES	Medium	2.Profit	3
39	MiddleAged	Man	Rural	NO	Medium	2.Profit	2
43	MiddleAged	Man	Rural	NO	Medium	2.Profit	2
48	MiddleAged	Man	Rural	NO	Medium	2.Profit	2
57	MiddleAged	Man	Rural	NO	Medium	2.Profit	2
140	MiddleAged	Man	Rural	YES	Medium	2.Profit	2
218	MiddleAged	Woman	Rural	YES	Medium	2.Profit	2
310	MiddleAged	Woman	Rural	YES	Medium	2.Profit	2
12	Senior	Man	Rural	YES	Low	2.Profit	4
13	Senior	Woman	Rural	YES	Low	2.Profit	4
32	Senior	Woman	Rural	NO	Medium	2.Profit	4
53	Senior	Woman	Rural	YES	High	2.Profit	4
62	Senior	Man	Rural	NO	Low	2.Profit	4
127	Senior	Woman	Rural	YES	Medium	2.Profit	4
153	Senior	Woman	Rural	NO	Low	2.Profit	4
154	Senior	Man	Rural	YES	Low	2.Profit	4
180	Senior	Woman	Rural	YES	Low	2.Profit	4
200	Senior	Man	Rural	YES	Low	2.Profit	4
260	Senior	Woman	Rural	NO	Low	2.Profit	4
281	Senior	Man	Rural	YES	Low	2.Profit	4
286	Senior	Man	Rural	YES	Low	2.Profit	4
289	Senior	Woman	Rural	YES	Low	2.Profit	4
293	Senior	Woman	Rural	YES	Low	2.Profit	4
323	Senior	Woman	Rural	YES	Low	2.Profit	4
343	Senior	Woman	Rural	YES	Medium	2.Profit	4
2	Senior	Woman	Rural	YES	Low	2.Profit	3
7	Senior	Woman	Rural	NO	Low	2.Profit	3
17	Senior	Woman	Rural	NO	Medium	2.Profit	3
33	Senior	Man	Rural	NO	Low	2.Profit	3
34	Senior	Man	Rural	YES	Low	2.Profit	3
52	Senior	Woman	Rural	NO	Low	2.Profit	3
77	Senior	Man	Rural	YES	Low	2.Profit	3
80	Senior	Woman	Rural	YES	Low	2.Profit	3
93	Senior	Woman	Rural	YES	Low	2.Profit	3
105	Senior	Woman	Rural	YES	Medium	2.Profit	3
109	Senior	Woman	Rural	YES	Low	2.Profit	3
131	Senior	Woman	Rural	NO	Low	2.Profit	3
133	Senior	Man	Rural	YES	Low	2.Profit	3
138	Senior	Woman	Rural	YES	Medium	2.Profit	3
148	Senior	Man	Rural	YES	Low	2.Profit	3
165	Senior	Man	Rural	NO	Low	2.Profit	3
173	Senior	Man	Rural	NO	Low	2.Profit	3
203	Senior	Man	Rural	YES	Medium	2.Profit	3
209	Senior	Man	Rural	YES	Medium	2.Profit	3
213	Senior	Woman	Rural	YES	Low	2.Profit	3
215	Senior	Woman	Rural	YES	Low	2.Profit	3
220	Senior	Woman	Rural	YES	Medium	2.Profit	3
227	Senior	Woman	Rural	YES	Medium	2.Profit	3
240	Senior	Woman	Rural	YES	Low	2.Profit	3
241	Senior	Woman	Rural	NO	Low	2.Profit	3
258	Senior	Man	Rural	YES	Low	2.Profit	3
275	Senior	Woman	Rural	YES	Low	2.Profit	3
277	Senior	Man	Rural	YES	Medium	2.Profit	3
306	Senior	Man	Rural	YES	Medium	2.Profit	3
319	Senior	Man	Rural	NO	Low	2.Profit	3
329	Senior	Man	Rural	YES	Low	2.Profit	3
339	Senior	Woman	Rural	YES	Low	2.Profit	3
5	Senior	Woman	Rural	NO	Low	2.Profit	2
44	Senior	Woman	Rural	YES	Low	2.Profit	2
50	Senior	Woman	Rural	NO	Low	2.Profit	2
51	Senior	Man	Rural	NO	Low	2.Profit	2
87	Senior	Man	Rural	NO	Low	2.Profit	2
101	Senior	Man	Rural	NO	Medium	2.Profit	2
120	Senior	Man	Rural	NO	Low	2.Profit	2
164	Senior	Woman	Rural	NO	Low	2.Profit	2
174	Senior	Man	Rural	YES	Low	2.Profit	2
219	Senior	Man	Rural	NO	Low	2.Profit	2
233	Senior	Woman	Rural	YES	Low	2.Profit	2
242	Senior	Woman	Rural	NO	Low	2.Profit	2
246	Senior	Woman	Rural	NO	Medium	2.Profit	2
276	Senior	Man	Rural	YES	Low	2.Profit	2
296	Senior	Woman	Rural	YES	Medium	2.Profit	2
322	Senior	Woman	Rural	NO	Medium	2.Profit	2
334	Senior	Man	Rural	NO	Low	2.Profit	2
262	Senior	Man	Rural	YES	Low	2.Profit	1
327	Senior	Woman	Rural	YES	Low	2.Profit	1
16	Young	Woman	Urban	YES	High	2.Hunting	3
47	Young	Man	Urban	YES	Medium	2.Hunting	3
98	Young	Man	Urban	NO	Medium	2.Hunting	3
103	Young	Woman	Urban	YES	Medium	2.Hunting	3
179	Young	Woman	Urban	YES	High	2.Hunting	3
308	Young	Man	Urban	YES	High	2.Hunting	3
9	Young	Woman	Urban	YES	Medium	2.Hunting	2
10	Young	Man	Urban	YES	High	2.Hunting	2
18	Young	Man	Urban	YES	Medium	2.Hunting	2
27	Young	Man	Urban	YES	High	2.Hunting	2
38	Young	Woman	Urban	YES	High	2.Hunting	2
41	Young	Woman	Urban	YES	High	2.Hunting	2
75	Young	Woman	Urban	NO	Medium	2.Hunting	2
83	Young	Woman	Urban	YES	High	2.Hunting	2
85	Young	Woman	Urban	YES	High	2.Hunting	2
95	Young	Woman	Urban	NO	Medium	2.Hunting	2
97	Young	Woman	Urban	YES	High	2.Hunting	2
108	Young	Man	Urban	YES	High	2.Hunting	2
114	Young	Woman	Urban	NO	Medium	2.Hunting	2
125	Young	Woman	Urban	YES	High	2.Hunting	2
136	Young	Woman	Urban	YES	High	2.Hunting	2
142	Young	Woman	Urban	NO	High	2.Hunting	2
145	Young	Woman	Urban	YES	High	2.Hunting	2
152	Young	Man	Urban	YES	High	2.Hunting	2
156	Young	Man	Urban	YES	High	2.Hunting	2
167	Young	Man	Urban	NO	High	2.Hunting	2
185	Young	Man	Urban	NO	High	2.Hunting	2
190	Young	Woman	Urban	YES	High	2.Hunting	2
192	Young	Man	Urban	YES	Medium	2.Hunting	2
202	Young	Woman	Urban	YES	High	2.Hunting	2
205	Young	Man	Urban	NO	Medium	2.Hunting	2
225	Young	Man	Urban	YES	High	2.Hunting	2
226	Young	Man	Urban	YES	Medium	2.Hunting	2
232	Young	Man	Urban	YES	Medium	2.Hunting	2
234	Young	Woman	Urban	YES	High	2.Hunting	2
235	Young	Woman	Urban	NO	High	2.Hunting	2
244	Young	Man	Urban	NO	Medium	2.Hunting	2
248	Young	Woman	Urban	YES	High	2.Hunting	2
261	Young	Woman	Urban	NO	High	2.Hunting	2
273	Young	Woman	Urban	NO	High	2.Hunting	2
278	Young	Woman	Urban	YES	High	2.Hunting	2
280	Young	Woman	Urban	YES	Medium	2.Hunting	2
282	Young	Man	Urban	YES	High	2.Hunting	2
288	Young	Woman	Urban	NO	High	2.Hunting	2
316	Young	Man	Urban	YES	High	2.Hunting	2
338	Young	Man	Urban	YES	High	2.Hunting	2
341	Young	Woman	Urban	YES	High	2.Hunting	2
6	Young	Woman	Urban	YES	Medium	2.Hunting	1
40	Young	Woman	Urban	YES	High	2.Hunting	1
72	Young	Man	Urban	NO	High	2.Hunting	1
116	Young	Man	Urban	YES	High	2.Hunting	1
123	Young	Man	Urban	YES	Medium	2.Hunting	1
130	Young	Woman	Urban	YES	Medium	2.Hunting	1
132	Young	Man	Urban	YES	Medium	2.Hunting	1
231	Young	Woman	Urban	YES	High	2.Hunting	1
243	Young	Man	Urban	YES	High	2.Hunting	1
259	Young	Man	Urban	YES	High	2.Hunting	1
268	Young	Woman	Urban	YES	High	2.Hunting	1
270	Young	Woman	Urban	NO	Medium	2.Hunting	1
279	Young	Woman	Urban	YES	Medium	2.Hunting	1
283	Young	Woman	Urban	YES	Medium	2.Hunting	1
290	Young	Man	Urban	YES	Medium	2.Hunting	1
298	Young	Man	Urban	NO	Medium	2.Hunting	1
324	Young	Man	Urban	NO	High	2.Hunting	1
332	Young	Man	Urban	YES	High	2.Hunting	1
342	Young	Man	Urban	YES	High	2.Hunting	1
45	MiddleAged	Woman	Urban	YES	Low	2.Hunting	3
196	MiddleAged	Woman	Urban	YES	High	2.Hunting	3
251	MiddleAged	Woman	Urban	NO	Medium	2.Hunting	3
254	MiddleAged	Woman	Urban	NO	Medium	2.Hunting	3
257	MiddleAged	Woman	Urban	NO	Medium	2.Hunting	3
294	MiddleAged	Man	Urban	NO	Low	2.Hunting	3
300	MiddleAged	Woman	Urban	YES	High	2.Hunting	3
1	MiddleAged	Woman	Urban	NO	Medium	2.Hunting	2
3	MiddleAged	Man	Urban	YES	Medium	2.Hunting	2
11	MiddleAged	Man	Urban	YES	Medium	2.Hunting	2
14	MiddleAged	Woman	Urban	YES	Medium	2.Hunting	2
15	MiddleAged	Woman	Urban	YES	Medium	2.Hunting	2
20	MiddleAged	Woman	Urban	NO	Medium	2.Hunting	2
21	MiddleAged	Man	Urban	NO	High	2.Hunting	2
23	MiddleAged	Man	Urban	YES	Medium	2.Hunting	2
35	MiddleAged	Woman	Urban	YES	Medium	2.Hunting	2
36	MiddleAged	Woman	Urban	YES	Medium	2.Hunting	2
54	MiddleAged	Woman	Urban	NO	Medium	2.Hunting	2
55	MiddleAged	Man	Urban	NO	Medium	2.Hunting	2
58	MiddleAged	Woman	Urban	YES	Low	2.Hunting	2
63	MiddleAged	Man	Urban	YES	High	2.Hunting	2
66	MiddleAged	Woman	Urban	NO	High	2.Hunting	2
68	MiddleAged	Woman	Urban	NO	Medium	2.Hunting	2
70	MiddleAged	Woman	Urban	NO	Medium	2.Hunting	2
73	MiddleAged	Man	Urban	YES	Medium	2.Hunting	2
76	MiddleAged	Woman	Urban	NO	Medium	2.Hunting	2
78	MiddleAged	Woman	Urban	NO	Medium	2.Hunting	2
79	MiddleAged	Man	Urban	NO	Medium	2.Hunting	2
81	MiddleAged	Man	Urban	NO	Low	2.Hunting	2
88	MiddleAged	Woman	Urban	YES	High	2.Hunting	2
90	MiddleAged	Woman	Urban	NO	Medium	2.Hunting	2
92	MiddleAged	Man	Urban	YES	Medium	2.Hunting	2
94	MiddleAged	Man	Urban	NO	Low	2.Hunting	2
100	MiddleAged	Man	Urban	NO	Medium	2.Hunting	2
104	MiddleAged	Man	Urban	YES	High	2.Hunting	2
110	MiddleAged	Woman	Urban	YES	High	2.Hunting	2
115	MiddleAged	Woman	Urban	NO	High	2.Hunting	2
117	MiddleAged	Man	Urban	NO	Medium	2.Hunting	2
118	MiddleAged	Man	Urban	NO	High	2.Hunting	2
119	MiddleAged	Woman	Urban	NO	Medium	2.Hunting	2
121	MiddleAged	Woman	Urban	NO	Medium	2.Hunting	2
124	MiddleAged	Woman	Urban	NO	Medium	2.Hunting	2
126	MiddleAged	Man	Urban	YES	Medium	2.Hunting	2
128	MiddleAged	Man	Urban	NO	High	2.Hunting	2
129	MiddleAged	Man	Urban	NO	High	2.Hunting	2
134	MiddleAged	Woman	Urban	YES	Medium	2.Hunting	2
141	MiddleAged	Woman	Urban	NO	High	2.Hunting	2
143	MiddleAged	Man	Urban	NO	Medium	2.Hunting	2
146	MiddleAged	Woman	Urban	NO	Medium	2.Hunting	2
147	MiddleAged	Man	Urban	NO	High	2.Hunting	2
149	MiddleAged	Woman	Urban	NO	Medium	2.Hunting	2
150	MiddleAged	Woman	Urban	NO	High	2.Hunting	2
151	MiddleAged	Woman	Urban	NO	Medium	2.Hunting	2
155	MiddleAged	Man	Urban	YES	Medium	2.Hunting	2
157	MiddleAged	Woman	Urban	YES	Medium	2.Hunting	2
159	MiddleAged	Woman	Urban	NO	Medium	2.Hunting	2
160	MiddleAged	Man	Urban	NO	Medium	2.Hunting	2
162	MiddleAged	Woman	Urban	NO	Medium	2.Hunting	2
168	MiddleAged	Woman	Urban	NO	Medium	2.Hunting	2
170	MiddleAged	Woman	Urban	YES	Medium	2.Hunting	2
175	MiddleAged	Woman	Urban	NO	Medium	2.Hunting	2
182	MiddleAged	Man	Urban	NO	Medium	2.Hunting	2
191	MiddleAged	Woman	Urban	YES	Medium	2.Hunting	2
193	MiddleAged	Man	Urban	NO	Low	2.Hunting	2
198	MiddleAged	Man	Urban	YES	Medium	2.Hunting	2
206	MiddleAged	Woman	Urban	NO	Medium	2.Hunting	2
208	MiddleAged	Man	Urban	YES	High	2.Hunting	2
211	MiddleAged	Woman	Urban	YES	High	2.Hunting	2
214	MiddleAged	Man	Urban	NO	Medium	2.Hunting	2
216	MiddleAged	Woman	Urban	NO	Medium	2.Hunting	2
217	MiddleAged	Man	Urban	YES	Medium	2.Hunting	2
221	MiddleAged	Woman	Urban	YES	High	2.Hunting	2
222	MiddleAged	Woman	Urban	NO	High	2.Hunting	2
223	MiddleAged	Man	Urban	NO	Medium	2.Hunting	2
230	MiddleAged	Woman	Urban	NO	Medium	2.Hunting	2
237	MiddleAged	Woman	Urban	NO	Medium	2.Hunting	2
239	MiddleAged	Man	Urban	NO	Medium	2.Hunting	2
247	MiddleAged	Woman	Urban	NO	High	2.Hunting	2
249	MiddleAged	Man	Urban	YES	Medium	2.Hunting	2
250	MiddleAged	Man	Urban	NO	Medium	2.Hunting	2
263	MiddleAged	Woman	Urban	NO	Low	2.Hunting	2
264	MiddleAged	Man	Urban	NO	Medium	2.Hunting	2
265	MiddleAged	Woman	Urban	NO	Low	2.Hunting	2
267	MiddleAged	Man	Urban	NO	Medium	2.Hunting	2
287	MiddleAged	Man	Urban	NO	Low	2.Hunting	2
291	MiddleAged	Man	Urban	NO	Medium	2.Hunting	2
297	MiddleAged	Man	Urban	YES	Medium	2.Hunting	2
301	MiddleAged	Man	Urban	NO	Medium	2.Hunting	2
302	MiddleAged	Woman	Urban	YES	Medium	2.Hunting	2
313	MiddleAged	Man	Urban	NO	Medium	2.Hunting	2
318	MiddleAged	Woman	Urban	YES	Medium	2.Hunting	2
325	MiddleAged	Man	Urban	NO	Medium	2.Hunting	2
328	MiddleAged	Woman	Urban	YES	Medium	2.Hunting	2
330	MiddleAged	Woman	Urban	NO	Medium	2.Hunting	2
333	MiddleAged	Woman	Urban	NO	Medium	2.Hunting	2
336	MiddleAged	Woman	Urban	YES	Medium	2.Hunting	2
337	MiddleAged	Woman	Urban	NO	Medium	2.Hunting	2
340	MiddleAged	Woman	Urban	NO	Medium	2.Hunting	2
344	MiddleAged	Woman	Urban	NO	Medium	2.Hunting	2
345	MiddleAged	Woman	Urban	YES	High	2.Hunting	2
24	MiddleAged	Woman	Urban	YES	Medium	2.Hunting	1
25	MiddleAged	Man	Urban	NO	Medium	2.Hunting	1
26	MiddleAged	Woman	Urban	NO	Low	2.Hunting	1
31	MiddleAged	Woman	Urban	NO	Medium	2.Hunting	1
37	MiddleAged	Man	Urban	NO	Medium	2.Hunting	1
42	MiddleAged	Man	Urban	YES	Medium	2.Hunting	1
46	MiddleAged	Woman	Urban	YES	Medium	2.Hunting	1
65	MiddleAged	Woman	Urban	NO	Medium	2.Hunting	1
67	MiddleAged	Man	Urban	YES	Low	2.Hunting	1
74	MiddleAged	Woman	Urban	YES	Medium	2.Hunting	1
82	MiddleAged	Man	Urban	YES	Medium	2.Hunting	1
96	MiddleAged	Woman	Urban	NO	Medium	2.Hunting	1
106	MiddleAged	Man	Urban	NO	Medium	2.Hunting	1
137	MiddleAged	Woman	Urban	YES	High	2.Hunting	1
169	MiddleAged	Woman	Urban	NO	Medium	2.Hunting	1
172	MiddleAged	Woman	Urban	YES	Medium	2.Hunting	1
177	MiddleAged	Man	Urban	NO	Medium	2.Hunting	1
184	MiddleAged	Man	Urban	NO	Medium	2.Hunting	1
188	MiddleAged	Man	Urban	YES	Medium	2.Hunting	1
189	MiddleAged	Man	Urban	YES	High	2.Hunting	1
195	MiddleAged	Woman	Urban	NO	Medium	2.Hunting	1
210	MiddleAged	Man	Urban	YES	High	2.Hunting	1
212	MiddleAged	Woman	Urban	NO	Medium	2.Hunting	1
224	MiddleAged	Woman	Urban	NO	Low	2.Hunting	1
228	MiddleAged	Woman	Urban	YES	Low	2.Hunting	1
236	MiddleAged	Man	Urban	NO	Medium	2.Hunting	1
238	MiddleAged	Woman	Urban	NO	High	2.Hunting	1
245	MiddleAged	Woman	Urban	YES	Medium	2.Hunting	1
255	MiddleAged	Man	Urban	YES	Medium	2.Hunting	1
274	MiddleAged	Man	Urban	NO	Medium	2.Hunting	1
284	MiddleAged	Woman	Urban	NO	Medium	2.Hunting	1
292	MiddleAged	Woman	Urban	NO	Low	2.Hunting	1
299	MiddleAged	Man	Urban	YES	High	2.Hunting	1
314	MiddleAged	Man	Urban	YES	High	2.Hunting	1
315	MiddleAged	Man	Urban	NO	Medium	2.Hunting	1
86	Senior	Man	Urban	NO	High	2.Hunting	3
178	Senior	Woman	Urban	NO	Low	2.Hunting	3
303	Senior	Woman	Urban	NO	Low	2.Hunting	3
8	Senior	Man	Urban	NO	Low	2.Hunting	2
22	Senior	Man	Urban	NO	Low	2.Hunting	2
30	Senior	Woman	Urban	NO	Low	2.Hunting	2
49	Senior	Woman	Urban	NO	Medium	2.Hunting	2
59	Senior	Woman	Urban	NO	Low	2.Hunting	2
61	Senior	Man	Urban	NO	Low	2.Hunting	2
71	Senior	Man	Urban	NO	Low	2.Hunting	2
84	Senior	Man	Urban	NO	Medium	2.Hunting	2
91	Senior	Man	Urban	NO	Low	2.Hunting	2
102	Senior	Woman	Urban	YES	Medium	2.Hunting	2
112	Senior	Man	Urban	NO	Low	2.Hunting	2
113	Senior	Woman	Urban	NO	Medium	2.Hunting	2
122	Senior	Man	Urban	NO	Low	2.Hunting	2
135	Senior	Man	Urban	YES	Medium	2.Hunting	2
139	Senior	Man	Urban	NO	Medium	2.Hunting	2
158	Senior	Man	Urban	NO	Low	2.Hunting	2
163	Senior	Woman	Urban	NO	Medium	2.Hunting	2
166	Senior	Woman	Urban	NO	Low	2.Hunting	2
171	Senior	Man	Urban	NO	Low	2.Hunting	2
176	Senior	Woman	Urban	NO	Low	2.Hunting	2
181	Senior	Man	Urban	NO	Medium	2.Hunting	2
183	Senior	Woman	Urban	NO	Low	2.Hunting	2
187	Senior	Woman	Urban	NO	Medium	2.Hunting	2
207	Senior	Woman	Urban	NO	Low	2.Hunting	2
229	Senior	Man	Urban	YES	Low	2.Hunting	2
252	Senior	Woman	Urban	YES	Medium	2.Hunting	2
253	Senior	Man	Urban	NO	Low	2.Hunting	2
266	Senior	Woman	Urban	NO	Low	2.Hunting	2
269	Senior	Woman	Urban	YES	High	2.Hunting	2
271	Senior	Woman	Urban	NO	Low	2.Hunting	2
272	Senior	Woman	Urban	YES	High	2.Hunting	2
304	Senior	Woman	Urban	NO	Low	2.Hunting	2
312	Senior	Woman	Urban	NO	Low	2.Hunting	2
317	Senior	Woman	Urban	NO	Medium	2.Hunting	2
326	Senior	Woman	Urban	NO	Low	2.Hunting	2
60	Senior	Woman	Urban	NO	Medium	2.Hunting	1
99	Senior	Man	Urban	NO	Low	2.Hunting	1
194	Senior	Woman	Urban	NO	Low	2.Hunting	1
201	Senior	Woman	Urban	YES	Medium	2.Hunting	1
256	Senior	Woman	Urban	YES	Low	2.Hunting	1
295	Senior	Woman	Urban	YES	Medium	2.Hunting	1
321	Senior	Man	Urban	NO	Medium	2.Hunting	1
89	Young	Woman	Rural	NO	Medium	2.Hunting	3
19	Young	Woman	Rural	YES	High	2.Hunting	2
28	Young	Man	Rural	YES	Medium	2.Hunting	2
29	Young	Woman	Rural	YES	High	2.Hunting	2
56	Young	Man	Rural	YES	High	2.Hunting	2
311	Young	Woman	Rural	YES	Medium	2.Hunting	2
331	Young	Woman	Rural	YES	High	2.Hunting	2
199	Young	Woman	Rural	YES	Medium	2.Hunting	1
140	MiddleAged	Man	Rural	YES	Medium	2.Hunting	3
197	MiddleAged	Man	Rural	YES	Medium	2.Hunting	3
4	MiddleAged	Man	Rural	YES	High	2.Hunting	2
39	MiddleAged	Man	Rural	NO	Medium	2.Hunting	2
57	MiddleAged	Man	Rural	NO	Medium	2.Hunting	2
69	MiddleAged	Woman	Rural	YES	Low	2.Hunting	2
107	MiddleAged	Man	Rural	YES	High	2.Hunting	2
111	MiddleAged	Woman	Rural	YES	Medium	2.Hunting	2
144	MiddleAged	Man	Rural	YES	High	2.Hunting	2
161	MiddleAged	Woman	Rural	YES	Medium	2.Hunting	2
204	MiddleAged	Woman	Rural	YES	Medium	2.Hunting	2
218	MiddleAged	Woman	Rural	YES	Medium	2.Hunting	2
285	MiddleAged	Woman	Rural	YES	Medium	2.Hunting	2
305	MiddleAged	Woman	Rural	YES	Medium	2.Hunting	2
320	MiddleAged	Woman	Rural	YES	Medium	2.Hunting	2
335	MiddleAged	Woman	Rural	YES	Medium	2.Hunting	2
43	MiddleAged	Man	Rural	NO	Medium	2.Hunting	1
48	MiddleAged	Man	Rural	NO	Medium	2.Hunting	1
64	MiddleAged	Woman	Rural	YES	Medium	2.Hunting	1
186	MiddleAged	Woman	Rural	YES	Medium	2.Hunting	1
307	MiddleAged	Man	Rural	YES	Low	2.Hunting	1
309	MiddleAged	Man	Rural	YES	Medium	2.Hunting	1
310	MiddleAged	Woman	Rural	YES	Medium	2.Hunting	1
154	Senior	Man	Rural	YES	Low	2.Hunting	4
7	Senior	Woman	Rural	NO	Low	2.Hunting	3
12	Senior	Man	Rural	YES	Low	2.Hunting	3
13	Senior	Woman	Rural	YES	Low	2.Hunting	3
80	Senior	Woman	Rural	YES	Low	2.Hunting	3
262	Senior	Man	Rural	YES	Low	2.Hunting	3
296	Senior	Woman	Rural	YES	Medium	2.Hunting	3
306	Senior	Man	Rural	YES	Medium	2.Hunting	3
2	Senior	Woman	Rural	YES	Low	2.Hunting	2
5	Senior	Woman	Rural	NO	Low	2.Hunting	2
32	Senior	Woman	Rural	NO	Medium	2.Hunting	2
33	Senior	Man	Rural	NO	Low	2.Hunting	2
34	Senior	Man	Rural	YES	Low	2.Hunting	2
44	Senior	Woman	Rural	YES	Low	2.Hunting	2
50	Senior	Woman	Rural	NO	Low	2.Hunting	2
51	Senior	Man	Rural	NO	Low	2.Hunting	2
52	Senior	Woman	Rural	NO	Low	2.Hunting	2
53	Senior	Woman	Rural	YES	High	2.Hunting	2
62	Senior	Man	Rural	NO	Low	2.Hunting	2
77	Senior	Man	Rural	YES	Low	2.Hunting	2
87	Senior	Man	Rural	NO	Low	2.Hunting	2
93	Senior	Woman	Rural	YES	Low	2.Hunting	2
101	Senior	Man	Rural	NO	Medium	2.Hunting	2
109	Senior	Woman	Rural	YES	Low	2.Hunting	2
120	Senior	Man	Rural	NO	Low	2.Hunting	2
127	Senior	Woman	Rural	YES	Medium	2.Hunting	2
131	Senior	Woman	Rural	NO	Low	2.Hunting	2
133	Senior	Man	Rural	YES	Low	2.Hunting	2
148	Senior	Man	Rural	YES	Low	2.Hunting	2
153	Senior	Woman	Rural	NO	Low	2.Hunting	2
164	Senior	Woman	Rural	NO	Low	2.Hunting	2
180	Senior	Woman	Rural	YES	Low	2.Hunting	2
200	Senior	Man	Rural	YES	Low	2.Hunting	2
203	Senior	Man	Rural	YES	Medium	2.Hunting	2
209	Senior	Man	Rural	YES	Medium	2.Hunting	2
215	Senior	Woman	Rural	YES	Low	2.Hunting	2
219	Senior	Man	Rural	NO	Low	2.Hunting	2
220	Senior	Woman	Rural	YES	Medium	2.Hunting	2
240	Senior	Woman	Rural	YES	Low	2.Hunting	2
241	Senior	Woman	Rural	NO	Low	2.Hunting	2
242	Senior	Woman	Rural	NO	Low	2.Hunting	2
258	Senior	Man	Rural	YES	Low	2.Hunting	2
260	Senior	Woman	Rural	NO	Low	2.Hunting	2
281	Senior	Man	Rural	YES	Low	2.Hunting	2
286	Senior	Man	Rural	YES	Low	2.Hunting	2
289	Senior	Woman	Rural	YES	Low	2.Hunting	2
293	Senior	Woman	Rural	YES	Low	2.Hunting	2
319	Senior	Man	Rural	NO	Low	2.Hunting	2
322	Senior	Woman	Rural	NO	Medium	2.Hunting	2
327	Senior	Woman	Rural	YES	Low	2.Hunting	2
334	Senior	Man	Rural	NO	Low	2.Hunting	2
339	Senior	Woman	Rural	YES	Low	2.Hunting	2
17	Senior	Woman	Rural	NO	Medium	2.Hunting	1
105	Senior	Woman	Rural	YES	Medium	2.Hunting	1
138	Senior	Woman	Rural	YES	Medium	2.Hunting	1
165	Senior	Man	Rural	NO	Low	2.Hunting	1
173	Senior	Man	Rural	NO	Low	2.Hunting	1
174	Senior	Man	Rural	YES	Low	2.Hunting	1
213	Senior	Woman	Rural	YES	Low	2.Hunting	1
227	Senior	Woman	Rural	YES	Medium	2.Hunting	1
233	Senior	Woman	Rural	YES	Low	2.Hunting	1
246	Senior	Woman	Rural	NO	Medium	2.Hunting	1
275	Senior	Woman	Rural	YES	Low	2.Hunting	1
276	Senior	Man	Rural	YES	Low	2.Hunting	1
277	Senior	Man	Rural	YES	Medium	2.Hunting	1
323	Senior	Woman	Rural	YES	Low	2.Hunting	1
329	Senior	Man	Rural	YES	Low	2.Hunting	1
343	Senior	Woman	Rural	YES	Medium	2.Hunting	1
75	Young	Woman	Urban	NO	Medium	2.Conflits	3
85	Young	Woman	Urban	YES	High	2.Conflits	3
179	Young	Woman	Urban	YES	High	2.Conflits	3
308	Young	Man	Urban	YES	High	2.Conflits	3
316	Young	Man	Urban	YES	High	2.Conflits	3
6	Young	Woman	Urban	YES	Medium	2.Conflits	2
9	Young	Woman	Urban	YES	Medium	2.Conflits	2
10	Young	Man	Urban	YES	High	2.Conflits	2
16	Young	Woman	Urban	YES	High	2.Conflits	2
18	Young	Man	Urban	YES	Medium	2.Conflits	2
27	Young	Man	Urban	YES	High	2.Conflits	2
72	Young	Man	Urban	NO	High	2.Conflits	2
108	Young	Man	Urban	YES	High	2.Conflits	2
114	Young	Woman	Urban	NO	Medium	2.Conflits	2
116	Young	Man	Urban	YES	High	2.Conflits	2
123	Young	Man	Urban	YES	Medium	2.Conflits	2
130	Young	Woman	Urban	YES	Medium	2.Conflits	2
132	Young	Man	Urban	YES	Medium	2.Conflits	2
136	Young	Woman	Urban	YES	High	2.Conflits	2
142	Young	Woman	Urban	NO	High	2.Conflits	2
145	Young	Woman	Urban	YES	High	2.Conflits	2
152	Young	Man	Urban	YES	High	2.Conflits	2
156	Young	Man	Urban	YES	High	2.Conflits	2
167	Young	Man	Urban	NO	High	2.Conflits	2
185	Young	Man	Urban	NO	High	2.Conflits	2
192	Young	Man	Urban	YES	Medium	2.Conflits	2
202	Young	Woman	Urban	YES	High	2.Conflits	2
205	Young	Man	Urban	NO	Medium	2.Conflits	2
225	Young	Man	Urban	YES	High	2.Conflits	2
226	Young	Man	Urban	YES	Medium	2.Conflits	2
232	Young	Man	Urban	YES	Medium	2.Conflits	2
234	Young	Woman	Urban	YES	High	2.Conflits	2
243	Young	Man	Urban	YES	High	2.Conflits	2
244	Young	Man	Urban	NO	Medium	2.Conflits	2
248	Young	Woman	Urban	YES	High	2.Conflits	2
261	Young	Woman	Urban	NO	High	2.Conflits	2
268	Young	Woman	Urban	YES	High	2.Conflits	2
270	Young	Woman	Urban	NO	Medium	2.Conflits	2
273	Young	Woman	Urban	NO	High	2.Conflits	2
278	Young	Woman	Urban	YES	High	2.Conflits	2
280	Young	Woman	Urban	YES	Medium	2.Conflits	2
282	Young	Man	Urban	YES	High	2.Conflits	2
288	Young	Woman	Urban	NO	High	2.Conflits	2
298	Young	Man	Urban	NO	Medium	2.Conflits	2
324	Young	Man	Urban	NO	High	2.Conflits	2
338	Young	Man	Urban	YES	High	2.Conflits	2
341	Young	Woman	Urban	YES	High	2.Conflits	2
342	Young	Man	Urban	YES	High	2.Conflits	2
38	Young	Woman	Urban	YES	High	2.Conflits	1
40	Young	Woman	Urban	YES	High	2.Conflits	1
41	Young	Woman	Urban	YES	High	2.Conflits	1
47	Young	Man	Urban	YES	Medium	2.Conflits	1
83	Young	Woman	Urban	YES	High	2.Conflits	1
95	Young	Woman	Urban	NO	Medium	2.Conflits	1
97	Young	Woman	Urban	YES	High	2.Conflits	1
98	Young	Man	Urban	NO	Medium	2.Conflits	1
103	Young	Woman	Urban	YES	Medium	2.Conflits	1
125	Young	Woman	Urban	YES	High	2.Conflits	1
190	Young	Woman	Urban	YES	High	2.Conflits	1
231	Young	Woman	Urban	YES	High	2.Conflits	1
235	Young	Woman	Urban	NO	High	2.Conflits	1
259	Young	Man	Urban	YES	High	2.Conflits	1
279	Young	Woman	Urban	YES	Medium	2.Conflits	1
283	Young	Woman	Urban	YES	Medium	2.Conflits	1
290	Young	Man	Urban	YES	Medium	2.Conflits	1
332	Young	Man	Urban	YES	High	2.Conflits	1
159	MiddleAged	Woman	Urban	NO	Medium	2.Conflits	3
221	MiddleAged	Woman	Urban	YES	High	2.Conflits	3
3	MiddleAged	Man	Urban	YES	Medium	2.Conflits	2
11	MiddleAged	Man	Urban	YES	Medium	2.Conflits	2
20	MiddleAged	Woman	Urban	NO	Medium	2.Conflits	2
21	MiddleAged	Man	Urban	NO	High	2.Conflits	2
23	MiddleAged	Man	Urban	YES	Medium	2.Conflits	2
24	MiddleAged	Woman	Urban	YES	Medium	2.Conflits	2
25	MiddleAged	Man	Urban	NO	Medium	2.Conflits	2
35	MiddleAged	Woman	Urban	YES	Medium	2.Conflits	2
37	MiddleAged	Man	Urban	NO	Medium	2.Conflits	2
42	MiddleAged	Man	Urban	YES	Medium	2.Conflits	2
55	MiddleAged	Man	Urban	NO	Medium	2.Conflits	2
58	MiddleAged	Woman	Urban	YES	Low	2.Conflits	2
63	MiddleAged	Man	Urban	YES	High	2.Conflits	2
66	MiddleAged	Woman	Urban	NO	High	2.Conflits	2
67	MiddleAged	Man	Urban	YES	Low	2.Conflits	2
70	MiddleAged	Woman	Urban	NO	Medium	2.Conflits	2
73	MiddleAged	Man	Urban	YES	Medium	2.Conflits	2
74	MiddleAged	Woman	Urban	YES	Medium	2.Conflits	2
76	MiddleAged	Woman	Urban	NO	Medium	2.Conflits	2
78	MiddleAged	Woman	Urban	NO	Medium	2.Conflits	2
79	MiddleAged	Man	Urban	NO	Medium	2.Conflits	2
82	MiddleAged	Man	Urban	YES	Medium	2.Conflits	2
92	MiddleAged	Man	Urban	YES	Medium	2.Conflits	2
94	MiddleAged	Man	Urban	NO	Low	2.Conflits	2
100	MiddleAged	Man	Urban	NO	Medium	2.Conflits	2
104	MiddleAged	Man	Urban	YES	High	2.Conflits	2
110	MiddleAged	Woman	Urban	YES	High	2.Conflits	2
115	MiddleAged	Woman	Urban	NO	High	2.Conflits	2
117	MiddleAged	Man	Urban	NO	Medium	2.Conflits	2
118	MiddleAged	Man	Urban	NO	High	2.Conflits	2
119	MiddleAged	Woman	Urban	NO	Medium	2.Conflits	2
121	MiddleAged	Woman	Urban	NO	Medium	2.Conflits	2
126	MiddleAged	Man	Urban	YES	Medium	2.Conflits	2
128	MiddleAged	Man	Urban	NO	High	2.Conflits	2
129	MiddleAged	Man	Urban	NO	High	2.Conflits	2
134	MiddleAged	Woman	Urban	YES	Medium	2.Conflits	2
137	MiddleAged	Woman	Urban	YES	High	2.Conflits	2
141	MiddleAged	Woman	Urban	NO	High	2.Conflits	2
146	MiddleAged	Woman	Urban	NO	Medium	2.Conflits	2
147	MiddleAged	Man	Urban	NO	High	2.Conflits	2
149	MiddleAged	Woman	Urban	NO	Medium	2.Conflits	2
150	MiddleAged	Woman	Urban	NO	High	2.Conflits	2
155	MiddleAged	Man	Urban	YES	Medium	2.Conflits	2
157	MiddleAged	Woman	Urban	YES	Medium	2.Conflits	2
160	MiddleAged	Man	Urban	NO	Medium	2.Conflits	2
162	MiddleAged	Woman	Urban	NO	Medium	2.Conflits	2
177	MiddleAged	Man	Urban	NO	Medium	2.Conflits	2
184	MiddleAged	Man	Urban	NO	Medium	2.Conflits	2
188	MiddleAged	Man	Urban	YES	Medium	2.Conflits	2
189	MiddleAged	Man	Urban	YES	High	2.Conflits	2
195	MiddleAged	Woman	Urban	NO	Medium	2.Conflits	2
196	MiddleAged	Woman	Urban	YES	High	2.Conflits	2
198	MiddleAged	Man	Urban	YES	Medium	2.Conflits	2
206	MiddleAged	Woman	Urban	NO	Medium	2.Conflits	2
208	MiddleAged	Man	Urban	YES	High	2.Conflits	2
214	MiddleAged	Man	Urban	NO	Medium	2.Conflits	2
223	MiddleAged	Man	Urban	NO	Medium	2.Conflits	2
230	MiddleAged	Woman	Urban	NO	Medium	2.Conflits	2
237	MiddleAged	Woman	Urban	NO	Medium	2.Conflits	2
238	MiddleAged	Woman	Urban	NO	High	2.Conflits	2
245	MiddleAged	Woman	Urban	YES	Medium	2.Conflits	2
247	MiddleAged	Woman	Urban	NO	High	2.Conflits	2
250	MiddleAged	Man	Urban	NO	Medium	2.Conflits	2
251	MiddleAged	Woman	Urban	NO	Medium	2.Conflits	2
254	MiddleAged	Woman	Urban	NO	Medium	2.Conflits	2
255	MiddleAged	Man	Urban	YES	Medium	2.Conflits	2
257	MiddleAged	Woman	Urban	NO	Medium	2.Conflits	2
264	MiddleAged	Man	Urban	NO	Medium	2.Conflits	2
267	MiddleAged	Man	Urban	NO	Medium	2.Conflits	2
287	MiddleAged	Man	Urban	NO	Low	2.Conflits	2
291	MiddleAged	Man	Urban	NO	Medium	2.Conflits	2
292	MiddleAged	Woman	Urban	NO	Low	2.Conflits	2
294	MiddleAged	Man	Urban	NO	Low	2.Conflits	2
297	MiddleAged	Man	Urban	YES	Medium	2.Conflits	2
300	MiddleAged	Woman	Urban	YES	High	2.Conflits	2
301	MiddleAged	Man	Urban	NO	Medium	2.Conflits	2
302	MiddleAged	Woman	Urban	YES	Medium	2.Conflits	2
313	MiddleAged	Man	Urban	NO	Medium	2.Conflits	2
314	MiddleAged	Man	Urban	YES	High	2.Conflits	2
315	MiddleAged	Man	Urban	NO	Medium	2.Conflits	2
318	MiddleAged	Woman	Urban	YES	Medium	2.Conflits	2
325	MiddleAged	Man	Urban	NO	Medium	2.Conflits	2
328	MiddleAged	Woman	Urban	YES	Medium	2.Conflits	2
330	MiddleAged	Woman	Urban	NO	Medium	2.Conflits	2
333	MiddleAged	Woman	Urban	NO	Medium	2.Conflits	2
336	MiddleAged	Woman	Urban	YES	Medium	2.Conflits	2
337	MiddleAged	Woman	Urban	NO	Medium	2.Conflits	2
340	MiddleAged	Woman	Urban	NO	Medium	2.Conflits	2
344	MiddleAged	Woman	Urban	NO	Medium	2.Conflits	2
345	MiddleAged	Woman	Urban	YES	High	2.Conflits	2
1	MiddleAged	Woman	Urban	NO	Medium	2.Conflits	1
14	MiddleAged	Woman	Urban	YES	Medium	2.Conflits	1
15	MiddleAged	Woman	Urban	YES	Medium	2.Conflits	1
26	MiddleAged	Woman	Urban	NO	Low	2.Conflits	1
31	MiddleAged	Woman	Urban	NO	Medium	2.Conflits	1
36	MiddleAged	Woman	Urban	YES	Medium	2.Conflits	1
45	MiddleAged	Woman	Urban	YES	Low	2.Conflits	1
46	MiddleAged	Woman	Urban	YES	Medium	2.Conflits	1
54	MiddleAged	Woman	Urban	NO	Medium	2.Conflits	1
65	MiddleAged	Woman	Urban	NO	Medium	2.Conflits	1
68	MiddleAged	Woman	Urban	NO	Medium	2.Conflits	1
81	MiddleAged	Man	Urban	NO	Low	2.Conflits	1
88	MiddleAged	Woman	Urban	YES	High	2.Conflits	1
90	MiddleAged	Woman	Urban	NO	Medium	2.Conflits	1
96	MiddleAged	Woman	Urban	NO	Medium	2.Conflits	1
106	MiddleAged	Man	Urban	NO	Medium	2.Conflits	1
124	MiddleAged	Woman	Urban	NO	Medium	2.Conflits	1
143	MiddleAged	Man	Urban	NO	Medium	2.Conflits	1
151	MiddleAged	Woman	Urban	NO	Medium	2.Conflits	1
168	MiddleAged	Woman	Urban	NO	Medium	2.Conflits	1
169	MiddleAged	Woman	Urban	NO	Medium	2.Conflits	1
170	MiddleAged	Woman	Urban	YES	Medium	2.Conflits	1
172	MiddleAged	Woman	Urban	YES	Medium	2.Conflits	1
175	MiddleAged	Woman	Urban	NO	Medium	2.Conflits	1
182	MiddleAged	Man	Urban	NO	Medium	2.Conflits	1
191	MiddleAged	Woman	Urban	YES	Medium	2.Conflits	1
193	MiddleAged	Man	Urban	NO	Low	2.Conflits	1
210	MiddleAged	Man	Urban	YES	High	2.Conflits	1
211	MiddleAged	Woman	Urban	YES	High	2.Conflits	1
212	MiddleAged	Woman	Urban	NO	Medium	2.Conflits	1
216	MiddleAged	Woman	Urban	NO	Medium	2.Conflits	1
217	MiddleAged	Man	Urban	YES	Medium	2.Conflits	1
222	MiddleAged	Woman	Urban	NO	High	2.Conflits	1
224	MiddleAged	Woman	Urban	NO	Low	2.Conflits	1
228	MiddleAged	Woman	Urban	YES	Low	2.Conflits	1
236	MiddleAged	Man	Urban	NO	Medium	2.Conflits	1
239	MiddleAged	Man	Urban	NO	Medium	2.Conflits	1
249	MiddleAged	Man	Urban	YES	Medium	2.Conflits	1
263	MiddleAged	Woman	Urban	NO	Low	2.Conflits	1
265	MiddleAged	Woman	Urban	NO	Low	2.Conflits	1
274	MiddleAged	Man	Urban	NO	Medium	2.Conflits	1
284	MiddleAged	Woman	Urban	NO	Medium	2.Conflits	1
299	MiddleAged	Man	Urban	YES	High	2.Conflits	1
8	Senior	Man	Urban	NO	Low	2.Conflits	3
22	Senior	Man	Urban	NO	Low	2.Conflits	2
59	Senior	Woman	Urban	NO	Low	2.Conflits	2
60	Senior	Woman	Urban	NO	Medium	2.Conflits	2
61	Senior	Man	Urban	NO	Low	2.Conflits	2
84	Senior	Man	Urban	NO	Medium	2.Conflits	2
86	Senior	Man	Urban	NO	High	2.Conflits	2
91	Senior	Man	Urban	NO	Low	2.Conflits	2
99	Senior	Man	Urban	NO	Low	2.Conflits	2
102	Senior	Woman	Urban	YES	Medium	2.Conflits	2
112	Senior	Man	Urban	NO	Low	2.Conflits	2
113	Senior	Woman	Urban	NO	Medium	2.Conflits	2
122	Senior	Man	Urban	NO	Low	2.Conflits	2
139	Senior	Man	Urban	NO	Medium	2.Conflits	2
158	Senior	Man	Urban	NO	Low	2.Conflits	2
163	Senior	Woman	Urban	NO	Medium	2.Conflits	2
176	Senior	Woman	Urban	NO	Low	2.Conflits	2
178	Senior	Woman	Urban	NO	Low	2.Conflits	2
181	Senior	Man	Urban	NO	Medium	2.Conflits	2
183	Senior	Woman	Urban	NO	Low	2.Conflits	2
201	Senior	Woman	Urban	YES	Medium	2.Conflits	2
252	Senior	Woman	Urban	YES	Medium	2.Conflits	2
253	Senior	Man	Urban	NO	Low	2.Conflits	2
269	Senior	Woman	Urban	YES	High	2.Conflits	2
271	Senior	Woman	Urban	NO	Low	2.Conflits	2
295	Senior	Woman	Urban	YES	Medium	2.Conflits	2
303	Senior	Woman	Urban	NO	Low	2.Conflits	2
304	Senior	Woman	Urban	NO	Low	2.Conflits	2
312	Senior	Woman	Urban	NO	Low	2.Conflits	2
317	Senior	Woman	Urban	NO	Medium	2.Conflits	2
321	Senior	Man	Urban	NO	Medium	2.Conflits	2
326	Senior	Woman	Urban	NO	Low	2.Conflits	2
30	Senior	Woman	Urban	NO	Low	2.Conflits	1
49	Senior	Woman	Urban	NO	Medium	2.Conflits	1
71	Senior	Man	Urban	NO	Low	2.Conflits	1
135	Senior	Man	Urban	YES	Medium	2.Conflits	1
166	Senior	Woman	Urban	NO	Low	2.Conflits	1
171	Senior	Man	Urban	NO	Low	2.Conflits	1
187	Senior	Woman	Urban	NO	Medium	2.Conflits	1
194	Senior	Woman	Urban	NO	Low	2.Conflits	1
207	Senior	Woman	Urban	NO	Low	2.Conflits	1
229	Senior	Man	Urban	YES	Low	2.Conflits	1
256	Senior	Woman	Urban	YES	Low	2.Conflits	1
266	Senior	Woman	Urban	NO	Low	2.Conflits	1
272	Senior	Woman	Urban	YES	High	2.Conflits	1
28	Young	Man	Rural	YES	Medium	2.Conflits	3
19	Young	Woman	Rural	YES	High	2.Conflits	2
29	Young	Woman	Rural	YES	High	2.Conflits	2
89	Young	Woman	Rural	NO	Medium	2.Conflits	2
199	Young	Woman	Rural	YES	Medium	2.Conflits	2
331	Young	Woman	Rural	YES	High	2.Conflits	2
56	Young	Man	Rural	YES	High	2.Conflits	1
311	Young	Woman	Rural	YES	Medium	2.Conflits	1
111	MiddleAged	Woman	Rural	YES	Medium	2.Conflits	3
204	MiddleAged	Woman	Rural	YES	Medium	2.Conflits	3
309	MiddleAged	Man	Rural	YES	Medium	2.Conflits	3
4	MiddleAged	Man	Rural	YES	High	2.Conflits	2
39	MiddleAged	Man	Rural	NO	Medium	2.Conflits	2
43	MiddleAged	Man	Rural	NO	Medium	2.Conflits	2
48	MiddleAged	Man	Rural	NO	Medium	2.Conflits	2
107	MiddleAged	Man	Rural	YES	High	2.Conflits	2
140	MiddleAged	Man	Rural	YES	Medium	2.Conflits	2
144	MiddleAged	Man	Rural	YES	High	2.Conflits	2
186	MiddleAged	Woman	Rural	YES	Medium	2.Conflits	2
197	MiddleAged	Man	Rural	YES	Medium	2.Conflits	2
305	MiddleAged	Woman	Rural	YES	Medium	2.Conflits	2
307	MiddleAged	Man	Rural	YES	Low	2.Conflits	2
320	MiddleAged	Woman	Rural	YES	Medium	2.Conflits	2
335	MiddleAged	Woman	Rural	YES	Medium	2.Conflits	2
57	MiddleAged	Man	Rural	NO	Medium	2.Conflits	1
64	MiddleAged	Woman	Rural	YES	Medium	2.Conflits	1
69	MiddleAged	Woman	Rural	YES	Low	2.Conflits	1
161	MiddleAged	Woman	Rural	YES	Medium	2.Conflits	1
218	MiddleAged	Woman	Rural	YES	Medium	2.Conflits	1
285	MiddleAged	Woman	Rural	YES	Medium	2.Conflits	1
310	MiddleAged	Woman	Rural	YES	Medium	2.Conflits	1
53	Senior	Woman	Rural	YES	High	2.Conflits	3
180	Senior	Woman	Rural	YES	Low	2.Conflits	3
281	Senior	Man	Rural	YES	Low	2.Conflits	3
2	Senior	Woman	Rural	YES	Low	2.Conflits	2
5	Senior	Woman	Rural	NO	Low	2.Conflits	2
7	Senior	Woman	Rural	NO	Low	2.Conflits	2
12	Senior	Man	Rural	YES	Low	2.Conflits	2
13	Senior	Woman	Rural	YES	Low	2.Conflits	2
17	Senior	Woman	Rural	NO	Medium	2.Conflits	2
32	Senior	Woman	Rural	NO	Medium	2.Conflits	2
33	Senior	Man	Rural	NO	Low	2.Conflits	2
34	Senior	Man	Rural	YES	Low	2.Conflits	2
44	Senior	Woman	Rural	YES	Low	2.Conflits	2
52	Senior	Woman	Rural	NO	Low	2.Conflits	2
62	Senior	Man	Rural	NO	Low	2.Conflits	2
77	Senior	Man	Rural	YES	Low	2.Conflits	2
80	Senior	Woman	Rural	YES	Low	2.Conflits	2
93	Senior	Woman	Rural	YES	Low	2.Conflits	2
101	Senior	Man	Rural	NO	Medium	2.Conflits	2
105	Senior	Woman	Rural	YES	Medium	2.Conflits	2
109	Senior	Woman	Rural	YES	Low	2.Conflits	2
120	Senior	Man	Rural	NO	Low	2.Conflits	2
127	Senior	Woman	Rural	YES	Medium	2.Conflits	2
131	Senior	Woman	Rural	NO	Low	2.Conflits	2
138	Senior	Woman	Rural	YES	Medium	2.Conflits	2
148	Senior	Man	Rural	YES	Low	2.Conflits	2
153	Senior	Woman	Rural	NO	Low	2.Conflits	2
154	Senior	Man	Rural	YES	Low	2.Conflits	2
203	Senior	Man	Rural	YES	Medium	2.Conflits	2
209	Senior	Man	Rural	YES	Medium	2.Conflits	2
213	Senior	Woman	Rural	YES	Low	2.Conflits	2
215	Senior	Woman	Rural	YES	Low	2.Conflits	2
219	Senior	Man	Rural	NO	Low	2.Conflits	2
220	Senior	Woman	Rural	YES	Medium	2.Conflits	2
227	Senior	Woman	Rural	YES	Medium	2.Conflits	2
233	Senior	Woman	Rural	YES	Low	2.Conflits	2
242	Senior	Woman	Rural	NO	Low	2.Conflits	2
258	Senior	Man	Rural	YES	Low	2.Conflits	2
260	Senior	Woman	Rural	NO	Low	2.Conflits	2
262	Senior	Man	Rural	YES	Low	2.Conflits	2
275	Senior	Woman	Rural	YES	Low	2.Conflits	2
289	Senior	Woman	Rural	YES	Low	2.Conflits	2
293	Senior	Woman	Rural	YES	Low	2.Conflits	2
296	Senior	Woman	Rural	YES	Medium	2.Conflits	2
306	Senior	Man	Rural	YES	Medium	2.Conflits	2
322	Senior	Woman	Rural	NO	Medium	2.Conflits	2
323	Senior	Woman	Rural	YES	Low	2.Conflits	2
327	Senior	Woman	Rural	YES	Low	2.Conflits	2
329	Senior	Man	Rural	YES	Low	2.Conflits	2
334	Senior	Man	Rural	NO	Low	2.Conflits	2
339	Senior	Woman	Rural	YES	Low	2.Conflits	2
343	Senior	Woman	Rural	YES	Medium	2.Conflits	2
50	Senior	Woman	Rural	NO	Low	2.Conflits	1
51	Senior	Man	Rural	NO	Low	2.Conflits	1
87	Senior	Man	Rural	NO	Low	2.Conflits	1
133	Senior	Man	Rural	YES	Low	2.Conflits	1
164	Senior	Woman	Rural	NO	Low	2.Conflits	1
165	Senior	Man	Rural	NO	Low	2.Conflits	1
173	Senior	Man	Rural	NO	Low	2.Conflits	1
174	Senior	Man	Rural	YES	Low	2.Conflits	1
200	Senior	Man	Rural	YES	Low	2.Conflits	1
240	Senior	Woman	Rural	YES	Low	2.Conflits	1
241	Senior	Woman	Rural	NO	Low	2.Conflits	1
246	Senior	Woman	Rural	NO	Medium	2.Conflits	1
276	Senior	Man	Rural	YES	Low	2.Conflits	1
277	Senior	Man	Rural	YES	Medium	2.Conflits	1
286	Senior	Man	Rural	YES	Low	2.Conflits	1
319	Senior	Man	Rural	NO	Low	2.Conflits	1
282	Young	Man	Urban	YES	High	2.Ranching	4
288	Young	Woman	Urban	NO	High	2.Ranching	4
9	Young	Woman	Urban	YES	Medium	2.Ranching	3
136	Young	Woman	Urban	YES	High	2.Ranching	3
6	Young	Woman	Urban	YES	Medium	2.Ranching	2
10	Young	Man	Urban	YES	High	2.Ranching	2
18	Young	Man	Urban	YES	Medium	2.Ranching	2
27	Young	Man	Urban	YES	High	2.Ranching	2
40	Young	Woman	Urban	YES	High	2.Ranching	2
41	Young	Woman	Urban	YES	High	2.Ranching	2
75	Young	Woman	Urban	NO	Medium	2.Ranching	2
85	Young	Woman	Urban	YES	High	2.Ranching	2
95	Young	Woman	Urban	NO	Medium	2.Ranching	2
97	Young	Woman	Urban	YES	High	2.Ranching	2
103	Young	Woman	Urban	YES	Medium	2.Ranching	2
116	Young	Man	Urban	YES	High	2.Ranching	2
125	Young	Woman	Urban	YES	High	2.Ranching	2
142	Young	Woman	Urban	NO	High	2.Ranching	2
145	Young	Woman	Urban	YES	High	2.Ranching	2
152	Young	Man	Urban	YES	High	2.Ranching	2
156	Young	Man	Urban	YES	High	2.Ranching	2
167	Young	Man	Urban	NO	High	2.Ranching	2
179	Young	Woman	Urban	YES	High	2.Ranching	2
185	Young	Man	Urban	NO	High	2.Ranching	2
192	Young	Man	Urban	YES	Medium	2.Ranching	2
202	Young	Woman	Urban	YES	High	2.Ranching	2
205	Young	Man	Urban	NO	Medium	2.Ranching	2
225	Young	Man	Urban	YES	High	2.Ranching	2
231	Young	Woman	Urban	YES	High	2.Ranching	2
232	Young	Man	Urban	YES	Medium	2.Ranching	2
244	Young	Man	Urban	NO	Medium	2.Ranching	2
248	Young	Woman	Urban	YES	High	2.Ranching	2
261	Young	Woman	Urban	NO	High	2.Ranching	2
273	Young	Woman	Urban	NO	High	2.Ranching	2
279	Young	Woman	Urban	YES	Medium	2.Ranching	2
280	Young	Woman	Urban	YES	Medium	2.Ranching	2
283	Young	Woman	Urban	YES	Medium	2.Ranching	2
308	Young	Man	Urban	YES	High	2.Ranching	2
316	Young	Man	Urban	YES	High	2.Ranching	2
324	Young	Man	Urban	NO	High	2.Ranching	2
332	Young	Man	Urban	YES	High	2.Ranching	2
338	Young	Man	Urban	YES	High	2.Ranching	2
341	Young	Woman	Urban	YES	High	2.Ranching	2
16	Young	Woman	Urban	YES	High	2.Ranching	1
38	Young	Woman	Urban	YES	High	2.Ranching	1
47	Young	Man	Urban	YES	Medium	2.Ranching	1
72	Young	Man	Urban	NO	High	2.Ranching	1
83	Young	Woman	Urban	YES	High	2.Ranching	1
98	Young	Man	Urban	NO	Medium	2.Ranching	1
108	Young	Man	Urban	YES	High	2.Ranching	1
114	Young	Woman	Urban	NO	Medium	2.Ranching	1
123	Young	Man	Urban	YES	Medium	2.Ranching	1
130	Young	Woman	Urban	YES	Medium	2.Ranching	1
132	Young	Man	Urban	YES	Medium	2.Ranching	1
190	Young	Woman	Urban	YES	High	2.Ranching	1
226	Young	Man	Urban	YES	Medium	2.Ranching	1
234	Young	Woman	Urban	YES	High	2.Ranching	1
235	Young	Woman	Urban	NO	High	2.Ranching	1
243	Young	Man	Urban	YES	High	2.Ranching	1
259	Young	Man	Urban	YES	High	2.Ranching	1
268	Young	Woman	Urban	YES	High	2.Ranching	1
270	Young	Woman	Urban	NO	Medium	2.Ranching	1
278	Young	Woman	Urban	YES	High	2.Ranching	1
290	Young	Man	Urban	YES	Medium	2.Ranching	1
298	Young	Man	Urban	NO	Medium	2.Ranching	1
342	Young	Man	Urban	YES	High	2.Ranching	1
159	MiddleAged	Woman	Urban	NO	Medium	2.Ranching	4
221	MiddleAged	Woman	Urban	YES	High	2.Ranching	4
23	MiddleAged	Man	Urban	YES	Medium	2.Ranching	3
37	MiddleAged	Man	Urban	NO	Medium	2.Ranching	3
157	MiddleAged	Woman	Urban	YES	Medium	2.Ranching	3
170	MiddleAged	Woman	Urban	YES	Medium	2.Ranching	3
175	MiddleAged	Woman	Urban	NO	Medium	2.Ranching	3
182	MiddleAged	Man	Urban	NO	Medium	2.Ranching	3
193	MiddleAged	Man	Urban	NO	Low	2.Ranching	3
206	MiddleAged	Woman	Urban	NO	Medium	2.Ranching	3
216	MiddleAged	Woman	Urban	NO	Medium	2.Ranching	3
230	MiddleAged	Woman	Urban	NO	Medium	2.Ranching	3
265	MiddleAged	Woman	Urban	NO	Low	2.Ranching	3
267	MiddleAged	Man	Urban	NO	Medium	2.Ranching	3
294	MiddleAged	Man	Urban	NO	Low	2.Ranching	3
314	MiddleAged	Man	Urban	YES	High	2.Ranching	3
328	MiddleAged	Woman	Urban	YES	Medium	2.Ranching	3
330	MiddleAged	Woman	Urban	NO	Medium	2.Ranching	3
1	MiddleAged	Woman	Urban	NO	Medium	2.Ranching	2
3	MiddleAged	Man	Urban	YES	Medium	2.Ranching	2
15	MiddleAged	Woman	Urban	YES	Medium	2.Ranching	2
20	MiddleAged	Woman	Urban	NO	Medium	2.Ranching	2
21	MiddleAged	Man	Urban	NO	High	2.Ranching	2
35	MiddleAged	Woman	Urban	YES	Medium	2.Ranching	2
36	MiddleAged	Woman	Urban	YES	Medium	2.Ranching	2
45	MiddleAged	Woman	Urban	YES	Low	2.Ranching	2
54	MiddleAged	Woman	Urban	NO	Medium	2.Ranching	2
55	MiddleAged	Man	Urban	NO	Medium	2.Ranching	2
58	MiddleAged	Woman	Urban	YES	Low	2.Ranching	2
63	MiddleAged	Man	Urban	YES	High	2.Ranching	2
65	MiddleAged	Woman	Urban	NO	Medium	2.Ranching	2
67	MiddleAged	Man	Urban	YES	Low	2.Ranching	2
70	MiddleAged	Woman	Urban	NO	Medium	2.Ranching	2
73	MiddleAged	Man	Urban	YES	Medium	2.Ranching	2
74	MiddleAged	Woman	Urban	YES	Medium	2.Ranching	2
78	MiddleAged	Woman	Urban	NO	Medium	2.Ranching	2
79	MiddleAged	Man	Urban	NO	Medium	2.Ranching	2
81	MiddleAged	Man	Urban	NO	Low	2.Ranching	2
88	MiddleAged	Woman	Urban	YES	High	2.Ranching	2
90	MiddleAged	Woman	Urban	NO	Medium	2.Ranching	2
92	MiddleAged	Man	Urban	YES	Medium	2.Ranching	2
96	MiddleAged	Woman	Urban	NO	Medium	2.Ranching	2
100	MiddleAged	Man	Urban	NO	Medium	2.Ranching	2
104	MiddleAged	Man	Urban	YES	High	2.Ranching	2
106	MiddleAged	Man	Urban	NO	Medium	2.Ranching	2
110	MiddleAged	Woman	Urban	YES	High	2.Ranching	2
115	MiddleAged	Woman	Urban	NO	High	2.Ranching	2
117	MiddleAged	Man	Urban	NO	Medium	2.Ranching	2
118	MiddleAged	Man	Urban	NO	High	2.Ranching	2
121	MiddleAged	Woman	Urban	NO	Medium	2.Ranching	2
124	MiddleAged	Woman	Urban	NO	Medium	2.Ranching	2
126	MiddleAged	Man	Urban	YES	Medium	2.Ranching	2
128	MiddleAged	Man	Urban	NO	High	2.Ranching	2
134	MiddleAged	Woman	Urban	YES	Medium	2.Ranching	2
141	MiddleAged	Woman	Urban	NO	High	2.Ranching	2
143	MiddleAged	Man	Urban	NO	Medium	2.Ranching	2
146	MiddleAged	Woman	Urban	NO	Medium	2.Ranching	2
147	MiddleAged	Man	Urban	NO	High	2.Ranching	2
149	MiddleAged	Woman	Urban	NO	Medium	2.Ranching	2
150	MiddleAged	Woman	Urban	NO	High	2.Ranching	2
151	MiddleAged	Woman	Urban	NO	Medium	2.Ranching	2
155	MiddleAged	Man	Urban	YES	Medium	2.Ranching	2
162	MiddleAged	Woman	Urban	NO	Medium	2.Ranching	2
168	MiddleAged	Woman	Urban	NO	Medium	2.Ranching	2
172	MiddleAged	Woman	Urban	YES	Medium	2.Ranching	2
177	MiddleAged	Man	Urban	NO	Medium	2.Ranching	2
184	MiddleAged	Man	Urban	NO	Medium	2.Ranching	2
188	MiddleAged	Man	Urban	YES	Medium	2.Ranching	2
191	MiddleAged	Woman	Urban	YES	Medium	2.Ranching	2
196	MiddleAged	Woman	Urban	YES	High	2.Ranching	2
198	MiddleAged	Man	Urban	YES	Medium	2.Ranching	2
210	MiddleAged	Man	Urban	YES	High	2.Ranching	2
211	MiddleAged	Woman	Urban	YES	High	2.Ranching	2
217	MiddleAged	Man	Urban	YES	Medium	2.Ranching	2
222	MiddleAged	Woman	Urban	NO	High	2.Ranching	2
238	MiddleAged	Woman	Urban	NO	High	2.Ranching	2
239	MiddleAged	Man	Urban	NO	Medium	2.Ranching	2
245	MiddleAged	Woman	Urban	YES	Medium	2.Ranching	2
247	MiddleAged	Woman	Urban	NO	High	2.Ranching	2
249	MiddleAged	Man	Urban	YES	Medium	2.Ranching	2
250	MiddleAged	Man	Urban	NO	Medium	2.Ranching	2
251	MiddleAged	Woman	Urban	NO	Medium	2.Ranching	2
254	MiddleAged	Woman	Urban	NO	Medium	2.Ranching	2
263	MiddleAged	Woman	Urban	NO	Low	2.Ranching	2
264	MiddleAged	Man	Urban	NO	Medium	2.Ranching	2
274	MiddleAged	Man	Urban	NO	Medium	2.Ranching	2
284	MiddleAged	Woman	Urban	NO	Medium	2.Ranching	2
291	MiddleAged	Man	Urban	NO	Medium	2.Ranching	2
292	MiddleAged	Woman	Urban	NO	Low	2.Ranching	2
297	MiddleAged	Man	Urban	YES	Medium	2.Ranching	2
299	MiddleAged	Man	Urban	YES	High	2.Ranching	2
300	MiddleAged	Woman	Urban	YES	High	2.Ranching	2
301	MiddleAged	Man	Urban	NO	Medium	2.Ranching	2
302	MiddleAged	Woman	Urban	YES	Medium	2.Ranching	2
315	MiddleAged	Man	Urban	NO	Medium	2.Ranching	2
325	MiddleAged	Man	Urban	NO	Medium	2.Ranching	2
333	MiddleAged	Woman	Urban	NO	Medium	2.Ranching	2
336	MiddleAged	Woman	Urban	YES	Medium	2.Ranching	2
337	MiddleAged	Woman	Urban	NO	Medium	2.Ranching	2
340	MiddleAged	Woman	Urban	NO	Medium	2.Ranching	2
344	MiddleAged	Woman	Urban	NO	Medium	2.Ranching	2
345	MiddleAged	Woman	Urban	YES	High	2.Ranching	2
11	MiddleAged	Man	Urban	YES	Medium	2.Ranching	1
14	MiddleAged	Woman	Urban	YES	Medium	2.Ranching	1
24	MiddleAged	Woman	Urban	YES	Medium	2.Ranching	1
25	MiddleAged	Man	Urban	NO	Medium	2.Ranching	1
26	MiddleAged	Woman	Urban	NO	Low	2.Ranching	1
31	MiddleAged	Woman	Urban	NO	Medium	2.Ranching	1
42	MiddleAged	Man	Urban	YES	Medium	2.Ranching	1
46	MiddleAged	Woman	Urban	YES	Medium	2.Ranching	1
66	MiddleAged	Woman	Urban	NO	High	2.Ranching	1
68	MiddleAged	Woman	Urban	NO	Medium	2.Ranching	1
76	MiddleAged	Woman	Urban	NO	Medium	2.Ranching	1
82	MiddleAged	Man	Urban	YES	Medium	2.Ranching	1
94	MiddleAged	Man	Urban	NO	Low	2.Ranching	1
119	MiddleAged	Woman	Urban	NO	Medium	2.Ranching	1
129	MiddleAged	Man	Urban	NO	High	2.Ranching	1
137	MiddleAged	Woman	Urban	YES	High	2.Ranching	1
160	MiddleAged	Man	Urban	NO	Medium	2.Ranching	1
169	MiddleAged	Woman	Urban	NO	Medium	2.Ranching	1
189	MiddleAged	Man	Urban	YES	High	2.Ranching	1
195	MiddleAged	Woman	Urban	NO	Medium	2.Ranching	1
208	MiddleAged	Man	Urban	YES	High	2.Ranching	1
212	MiddleAged	Woman	Urban	NO	Medium	2.Ranching	1
214	MiddleAged	Man	Urban	NO	Medium	2.Ranching	1
223	MiddleAged	Man	Urban	NO	Medium	2.Ranching	1
224	MiddleAged	Woman	Urban	NO	Low	2.Ranching	1
228	MiddleAged	Woman	Urban	YES	Low	2.Ranching	1
236	MiddleAged	Man	Urban	NO	Medium	2.Ranching	1
237	MiddleAged	Woman	Urban	NO	Medium	2.Ranching	1
255	MiddleAged	Man	Urban	YES	Medium	2.Ranching	1
257	MiddleAged	Woman	Urban	NO	Medium	2.Ranching	1
287	MiddleAged	Man	Urban	NO	Low	2.Ranching	1
313	MiddleAged	Man	Urban	NO	Medium	2.Ranching	1
318	MiddleAged	Woman	Urban	YES	Medium	2.Ranching	1
8	Senior	Man	Urban	NO	Low	2.Ranching	3
30	Senior	Woman	Urban	NO	Low	2.Ranching	3
59	Senior	Woman	Urban	NO	Low	2.Ranching	3
60	Senior	Woman	Urban	NO	Medium	2.Ranching	3
91	Senior	Man	Urban	NO	Low	2.Ranching	3
122	Senior	Man	Urban	NO	Low	2.Ranching	3
166	Senior	Woman	Urban	NO	Low	2.Ranching	3
176	Senior	Woman	Urban	NO	Low	2.Ranching	3
178	Senior	Woman	Urban	NO	Low	2.Ranching	3
181	Senior	Man	Urban	NO	Medium	2.Ranching	3
207	Senior	Woman	Urban	NO	Low	2.Ranching	3
271	Senior	Woman	Urban	NO	Low	2.Ranching	3
303	Senior	Woman	Urban	NO	Low	2.Ranching	3
22	Senior	Man	Urban	NO	Low	2.Ranching	2
49	Senior	Woman	Urban	NO	Medium	2.Ranching	2
61	Senior	Man	Urban	NO	Low	2.Ranching	2
84	Senior	Man	Urban	NO	Medium	2.Ranching	2
86	Senior	Man	Urban	NO	High	2.Ranching	2
102	Senior	Woman	Urban	YES	Medium	2.Ranching	2
112	Senior	Man	Urban	NO	Low	2.Ranching	2
135	Senior	Man	Urban	YES	Medium	2.Ranching	2
139	Senior	Man	Urban	NO	Medium	2.Ranching	2
158	Senior	Man	Urban	NO	Low	2.Ranching	2
163	Senior	Woman	Urban	NO	Medium	2.Ranching	2
171	Senior	Man	Urban	NO	Low	2.Ranching	2
183	Senior	Woman	Urban	NO	Low	2.Ranching	2
194	Senior	Woman	Urban	NO	Low	2.Ranching	2
201	Senior	Woman	Urban	YES	Medium	2.Ranching	2
229	Senior	Man	Urban	YES	Low	2.Ranching	2
252	Senior	Woman	Urban	YES	Medium	2.Ranching	2
256	Senior	Woman	Urban	YES	Low	2.Ranching	2
266	Senior	Woman	Urban	NO	Low	2.Ranching	2
269	Senior	Woman	Urban	YES	High	2.Ranching	2
272	Senior	Woman	Urban	YES	High	2.Ranching	2
295	Senior	Woman	Urban	YES	Medium	2.Ranching	2
312	Senior	Woman	Urban	NO	Low	2.Ranching	2
317	Senior	Woman	Urban	NO	Medium	2.Ranching	2
321	Senior	Man	Urban	NO	Medium	2.Ranching	2
326	Senior	Woman	Urban	NO	Low	2.Ranching	2
71	Senior	Man	Urban	NO	Low	2.Ranching	1
99	Senior	Man	Urban	NO	Low	2.Ranching	1
113	Senior	Woman	Urban	NO	Medium	2.Ranching	1
187	Senior	Woman	Urban	NO	Medium	2.Ranching	1
253	Senior	Man	Urban	NO	Low	2.Ranching	1
304	Senior	Woman	Urban	NO	Low	2.Ranching	1
28	Young	Man	Rural	YES	Medium	2.Ranching	3
29	Young	Woman	Rural	YES	High	2.Ranching	3
56	Young	Man	Rural	YES	High	2.Ranching	3
89	Young	Woman	Rural	NO	Medium	2.Ranching	3
199	Young	Woman	Rural	YES	Medium	2.Ranching	2
311	Young	Woman	Rural	YES	Medium	2.Ranching	2
331	Young	Woman	Rural	YES	High	2.Ranching	2
19	Young	Woman	Rural	YES	High	2.Ranching	1
69	MiddleAged	Woman	Rural	YES	Low	2.Ranching	3
111	MiddleAged	Woman	Rural	YES	Medium	2.Ranching	3
204	MiddleAged	Woman	Rural	YES	Medium	2.Ranching	3
285	MiddleAged	Woman	Rural	YES	Medium	2.Ranching	3
305	MiddleAged	Woman	Rural	YES	Medium	2.Ranching	3
4	MiddleAged	Man	Rural	YES	High	2.Ranching	2
43	MiddleAged	Man	Rural	NO	Medium	2.Ranching	2
57	MiddleAged	Man	Rural	NO	Medium	2.Ranching	2
64	MiddleAged	Woman	Rural	YES	Medium	2.Ranching	2
140	MiddleAged	Man	Rural	YES	Medium	2.Ranching	2
161	MiddleAged	Woman	Rural	YES	Medium	2.Ranching	2
186	MiddleAged	Woman	Rural	YES	Medium	2.Ranching	2
218	MiddleAged	Woman	Rural	YES	Medium	2.Ranching	2
307	MiddleAged	Man	Rural	YES	Low	2.Ranching	2
310	MiddleAged	Woman	Rural	YES	Medium	2.Ranching	2
320	MiddleAged	Woman	Rural	YES	Medium	2.Ranching	2
335	MiddleAged	Woman	Rural	YES	Medium	2.Ranching	2
39	MiddleAged	Man	Rural	NO	Medium	2.Ranching	1
48	MiddleAged	Man	Rural	NO	Medium	2.Ranching	1
107	MiddleAged	Man	Rural	YES	High	2.Ranching	1
144	MiddleAged	Man	Rural	YES	High	2.Ranching	1
197	MiddleAged	Man	Rural	YES	Medium	2.Ranching	1
309	MiddleAged	Man	Rural	YES	Medium	2.Ranching	1
53	Senior	Woman	Rural	YES	High	2.Ranching	4
2	Senior	Woman	Rural	YES	Low	2.Ranching	3
5	Senior	Woman	Rural	NO	Low	2.Ranching	3
77	Senior	Man	Rural	YES	Low	2.Ranching	3
80	Senior	Woman	Rural	YES	Low	2.Ranching	3
164	Senior	Woman	Rural	NO	Low	2.Ranching	3
203	Senior	Man	Rural	YES	Medium	2.Ranching	3
209	Senior	Man	Rural	YES	Medium	2.Ranching	3
281	Senior	Man	Rural	YES	Low	2.Ranching	3
296	Senior	Woman	Rural	YES	Medium	2.Ranching	3
7	Senior	Woman	Rural	NO	Low	2.Ranching	2
12	Senior	Man	Rural	YES	Low	2.Ranching	2
13	Senior	Woman	Rural	YES	Low	2.Ranching	2
17	Senior	Woman	Rural	NO	Medium	2.Ranching	2
32	Senior	Woman	Rural	NO	Medium	2.Ranching	2
33	Senior	Man	Rural	NO	Low	2.Ranching	2
34	Senior	Man	Rural	YES	Low	2.Ranching	2
44	Senior	Woman	Rural	YES	Low	2.Ranching	2
50	Senior	Woman	Rural	NO	Low	2.Ranching	2
51	Senior	Man	Rural	NO	Low	2.Ranching	2
52	Senior	Woman	Rural	NO	Low	2.Ranching	2
62	Senior	Man	Rural	NO	Low	2.Ranching	2
87	Senior	Man	Rural	NO	Low	2.Ranching	2
93	Senior	Woman	Rural	YES	Low	2.Ranching	2
101	Senior	Man	Rural	NO	Medium	2.Ranching	2
105	Senior	Woman	Rural	YES	Medium	2.Ranching	2
109	Senior	Woman	Rural	YES	Low	2.Ranching	2
120	Senior	Man	Rural	NO	Low	2.Ranching	2
127	Senior	Woman	Rural	YES	Medium	2.Ranching	2
131	Senior	Woman	Rural	NO	Low	2.Ranching	2
138	Senior	Woman	Rural	YES	Medium	2.Ranching	2
148	Senior	Man	Rural	YES	Low	2.Ranching	2
153	Senior	Woman	Rural	NO	Low	2.Ranching	2
174	Senior	Man	Rural	YES	Low	2.Ranching	2
180	Senior	Woman	Rural	YES	Low	2.Ranching	2
200	Senior	Man	Rural	YES	Low	2.Ranching	2
213	Senior	Woman	Rural	YES	Low	2.Ranching	2
215	Senior	Woman	Rural	YES	Low	2.Ranching	2
219	Senior	Man	Rural	NO	Low	2.Ranching	2
220	Senior	Woman	Rural	YES	Medium	2.Ranching	2
227	Senior	Woman	Rural	YES	Medium	2.Ranching	2
233	Senior	Woman	Rural	YES	Low	2.Ranching	2
241	Senior	Woman	Rural	NO	Low	2.Ranching	2
260	Senior	Woman	Rural	NO	Low	2.Ranching	2
262	Senior	Man	Rural	YES	Low	2.Ranching	2
275	Senior	Woman	Rural	YES	Low	2.Ranching	2
277	Senior	Man	Rural	YES	Medium	2.Ranching	2
286	Senior	Man	Rural	YES	Low	2.Ranching	2
289	Senior	Woman	Rural	YES	Low	2.Ranching	2
293	Senior	Woman	Rural	YES	Low	2.Ranching	2
319	Senior	Man	Rural	NO	Low	2.Ranching	2
322	Senior	Woman	Rural	NO	Medium	2.Ranching	2
323	Senior	Woman	Rural	YES	Low	2.Ranching	2
327	Senior	Woman	Rural	YES	Low	2.Ranching	2
329	Senior	Man	Rural	YES	Low	2.Ranching	2
334	Senior	Man	Rural	NO	Low	2.Ranching	2
339	Senior	Woman	Rural	YES	Low	2.Ranching	2
343	Senior	Woman	Rural	YES	Medium	2.Ranching	2
133	Senior	Man	Rural	YES	Low	2.Ranching	1
154	Senior	Man	Rural	YES	Low	2.Ranching	1
165	Senior	Man	Rural	NO	Low	2.Ranching	1
173	Senior	Man	Rural	NO	Low	2.Ranching	1
240	Senior	Woman	Rural	YES	Low	2.Ranching	1
242	Senior	Woman	Rural	NO	Low	2.Ranching	1
246	Senior	Woman	Rural	NO	Medium	2.Ranching	1
258	Senior	Man	Rural	YES	Low	2.Ranching	1
276	Senior	Man	Rural	YES	Low	2.Ranching	1
306	Senior	Man	Rural	YES	Medium	2.Ranching	1
136	Young	Woman	Urban	YES	High	2.Veg.Manag.	4
261	Young	Woman	Urban	NO	High	2.Veg.Manag.	4
282	Young	Man	Urban	YES	High	2.Veg.Manag.	4
288	Young	Woman	Urban	NO	High	2.Veg.Manag.	4
6	Young	Woman	Urban	YES	Medium	2.Veg.Manag.	3
9	Young	Woman	Urban	YES	Medium	2.Veg.Manag.	3
16	Young	Woman	Urban	YES	High	2.Veg.Manag.	3
18	Young	Man	Urban	YES	Medium	2.Veg.Manag.	3
27	Young	Man	Urban	YES	High	2.Veg.Manag.	3
41	Young	Woman	Urban	YES	High	2.Veg.Manag.	3
47	Young	Man	Urban	YES	Medium	2.Veg.Manag.	3
75	Young	Woman	Urban	NO	Medium	2.Veg.Manag.	3
85	Young	Woman	Urban	YES	High	2.Veg.Manag.	3
97	Young	Woman	Urban	YES	High	2.Veg.Manag.	3
103	Young	Woman	Urban	YES	Medium	2.Veg.Manag.	3
145	Young	Woman	Urban	YES	High	2.Veg.Manag.	3
167	Young	Man	Urban	NO	High	2.Veg.Manag.	3
179	Young	Woman	Urban	YES	High	2.Veg.Manag.	3
185	Young	Man	Urban	NO	High	2.Veg.Manag.	3
192	Young	Man	Urban	YES	Medium	2.Veg.Manag.	3
202	Young	Woman	Urban	YES	High	2.Veg.Manag.	3
205	Young	Man	Urban	NO	Medium	2.Veg.Manag.	3
225	Young	Man	Urban	YES	High	2.Veg.Manag.	3
226	Young	Man	Urban	YES	Medium	2.Veg.Manag.	3
232	Young	Man	Urban	YES	Medium	2.Veg.Manag.	3
235	Young	Woman	Urban	NO	High	2.Veg.Manag.	3
243	Young	Man	Urban	YES	High	2.Veg.Manag.	3
244	Young	Man	Urban	NO	Medium	2.Veg.Manag.	3
248	Young	Woman	Urban	YES	High	2.Veg.Manag.	3
259	Young	Man	Urban	YES	High	2.Veg.Manag.	3
273	Young	Woman	Urban	NO	High	2.Veg.Manag.	3
290	Young	Man	Urban	YES	Medium	2.Veg.Manag.	3
308	Young	Man	Urban	YES	High	2.Veg.Manag.	3
316	Young	Man	Urban	YES	High	2.Veg.Manag.	3
338	Young	Man	Urban	YES	High	2.Veg.Manag.	3
341	Young	Woman	Urban	YES	High	2.Veg.Manag.	3
10	Young	Man	Urban	YES	High	2.Veg.Manag.	2
38	Young	Woman	Urban	YES	High	2.Veg.Manag.	2
40	Young	Woman	Urban	YES	High	2.Veg.Manag.	2
72	Young	Man	Urban	NO	High	2.Veg.Manag.	2
83	Young	Woman	Urban	YES	High	2.Veg.Manag.	2
95	Young	Woman	Urban	NO	Medium	2.Veg.Manag.	2
98	Young	Man	Urban	NO	Medium	2.Veg.Manag.	2
108	Young	Man	Urban	YES	High	2.Veg.Manag.	2
114	Young	Woman	Urban	NO	Medium	2.Veg.Manag.	2
116	Young	Man	Urban	YES	High	2.Veg.Manag.	2
123	Young	Man	Urban	YES	Medium	2.Veg.Manag.	2
125	Young	Woman	Urban	YES	High	2.Veg.Manag.	2
130	Young	Woman	Urban	YES	Medium	2.Veg.Manag.	2
132	Young	Man	Urban	YES	Medium	2.Veg.Manag.	2
142	Young	Woman	Urban	NO	High	2.Veg.Manag.	2
152	Young	Man	Urban	YES	High	2.Veg.Manag.	2
156	Young	Man	Urban	YES	High	2.Veg.Manag.	2
190	Young	Woman	Urban	YES	High	2.Veg.Manag.	2
231	Young	Woman	Urban	YES	High	2.Veg.Manag.	2
234	Young	Woman	Urban	YES	High	2.Veg.Manag.	2
268	Young	Woman	Urban	YES	High	2.Veg.Manag.	2
270	Young	Woman	Urban	NO	Medium	2.Veg.Manag.	2
278	Young	Woman	Urban	YES	High	2.Veg.Manag.	2
279	Young	Woman	Urban	YES	Medium	2.Veg.Manag.	2
280	Young	Woman	Urban	YES	Medium	2.Veg.Manag.	2
283	Young	Woman	Urban	YES	Medium	2.Veg.Manag.	2
298	Young	Man	Urban	NO	Medium	2.Veg.Manag.	2
324	Young	Man	Urban	NO	High	2.Veg.Manag.	2
332	Young	Man	Urban	YES	High	2.Veg.Manag.	2
342	Young	Man	Urban	YES	High	2.Veg.Manag.	2
23	MiddleAged	Man	Urban	YES	Medium	2.Veg.Manag.	4
45	MiddleAged	Woman	Urban	YES	Low	2.Veg.Manag.	4
155	MiddleAged	Man	Urban	YES	Medium	2.Veg.Manag.	4
157	MiddleAged	Woman	Urban	YES	Medium	2.Veg.Manag.	4
175	MiddleAged	Woman	Urban	NO	Medium	2.Veg.Manag.	4
182	MiddleAged	Man	Urban	NO	Medium	2.Veg.Manag.	4
193	MiddleAged	Man	Urban	NO	Low	2.Veg.Manag.	4
196	MiddleAged	Woman	Urban	YES	High	2.Veg.Manag.	4
206	MiddleAged	Woman	Urban	NO	Medium	2.Veg.Manag.	4
216	MiddleAged	Woman	Urban	NO	Medium	2.Veg.Manag.	4
228	MiddleAged	Woman	Urban	YES	Low	2.Veg.Manag.	4
230	MiddleAged	Woman	Urban	NO	Medium	2.Veg.Manag.	4
251	MiddleAged	Woman	Urban	NO	Medium	2.Veg.Manag.	4
254	MiddleAged	Woman	Urban	NO	Medium	2.Veg.Manag.	4
264	MiddleAged	Man	Urban	NO	Medium	2.Veg.Manag.	4
265	MiddleAged	Woman	Urban	NO	Low	2.Veg.Manag.	4
267	MiddleAged	Man	Urban	NO	Medium	2.Veg.Manag.	4
294	MiddleAged	Man	Urban	NO	Low	2.Veg.Manag.	4
300	MiddleAged	Woman	Urban	YES	High	2.Veg.Manag.	4
314	MiddleAged	Man	Urban	YES	High	2.Veg.Manag.	4
330	MiddleAged	Woman	Urban	NO	Medium	2.Veg.Manag.	4
1	MiddleAged	Woman	Urban	NO	Medium	2.Veg.Manag.	3
14	MiddleAged	Woman	Urban	YES	Medium	2.Veg.Manag.	3
21	MiddleAged	Man	Urban	NO	High	2.Veg.Manag.	3
26	MiddleAged	Woman	Urban	NO	Low	2.Veg.Manag.	3
31	MiddleAged	Woman	Urban	NO	Medium	2.Veg.Manag.	3
35	MiddleAged	Woman	Urban	YES	Medium	2.Veg.Manag.	3
36	MiddleAged	Woman	Urban	YES	Medium	2.Veg.Manag.	3
37	MiddleAged	Man	Urban	NO	Medium	2.Veg.Manag.	3
42	MiddleAged	Man	Urban	YES	Medium	2.Veg.Manag.	3
46	MiddleAged	Woman	Urban	YES	Medium	2.Veg.Manag.	3
54	MiddleAged	Woman	Urban	NO	Medium	2.Veg.Manag.	3
55	MiddleAged	Man	Urban	NO	Medium	2.Veg.Manag.	3
58	MiddleAged	Woman	Urban	YES	Low	2.Veg.Manag.	3
65	MiddleAged	Woman	Urban	NO	Medium	2.Veg.Manag.	3
66	MiddleAged	Woman	Urban	NO	High	2.Veg.Manag.	3
67	MiddleAged	Man	Urban	YES	Low	2.Veg.Manag.	3
68	MiddleAged	Woman	Urban	NO	Medium	2.Veg.Manag.	3
70	MiddleAged	Woman	Urban	NO	Medium	2.Veg.Manag.	3
73	MiddleAged	Man	Urban	YES	Medium	2.Veg.Manag.	3
74	MiddleAged	Woman	Urban	YES	Medium	2.Veg.Manag.	3
79	MiddleAged	Man	Urban	NO	Medium	2.Veg.Manag.	3
90	MiddleAged	Woman	Urban	NO	Medium	2.Veg.Manag.	3
100	MiddleAged	Man	Urban	NO	Medium	2.Veg.Manag.	3
104	MiddleAged	Man	Urban	YES	High	2.Veg.Manag.	3
110	MiddleAged	Woman	Urban	YES	High	2.Veg.Manag.	3
117	MiddleAged	Man	Urban	NO	Medium	2.Veg.Manag.	3
118	MiddleAged	Man	Urban	NO	High	2.Veg.Manag.	3
124	MiddleAged	Woman	Urban	NO	Medium	2.Veg.Manag.	3
126	MiddleAged	Man	Urban	YES	Medium	2.Veg.Manag.	3
128	MiddleAged	Man	Urban	NO	High	2.Veg.Manag.	3
129	MiddleAged	Man	Urban	NO	High	2.Veg.Manag.	3
134	MiddleAged	Woman	Urban	YES	Medium	2.Veg.Manag.	3
137	MiddleAged	Woman	Urban	YES	High	2.Veg.Manag.	3
141	MiddleAged	Woman	Urban	NO	High	2.Veg.Manag.	3
146	MiddleAged	Woman	Urban	NO	Medium	2.Veg.Manag.	3
147	MiddleAged	Man	Urban	NO	High	2.Veg.Manag.	3
149	MiddleAged	Woman	Urban	NO	Medium	2.Veg.Manag.	3
150	MiddleAged	Woman	Urban	NO	High	2.Veg.Manag.	3
159	MiddleAged	Woman	Urban	NO	Medium	2.Veg.Manag.	3
160	MiddleAged	Man	Urban	NO	Medium	2.Veg.Manag.	3
168	MiddleAged	Woman	Urban	NO	Medium	2.Veg.Manag.	3
170	MiddleAged	Woman	Urban	YES	Medium	2.Veg.Manag.	3
172	MiddleAged	Woman	Urban	YES	Medium	2.Veg.Manag.	3
177	MiddleAged	Man	Urban	NO	Medium	2.Veg.Manag.	3
184	MiddleAged	Man	Urban	NO	Medium	2.Veg.Manag.	3
188	MiddleAged	Man	Urban	YES	Medium	2.Veg.Manag.	3
189	MiddleAged	Man	Urban	YES	High	2.Veg.Manag.	3
195	MiddleAged	Woman	Urban	NO	Medium	2.Veg.Manag.	3
221	MiddleAged	Woman	Urban	YES	High	2.Veg.Manag.	3
222	MiddleAged	Woman	Urban	NO	High	2.Veg.Manag.	3
223	MiddleAged	Man	Urban	NO	Medium	2.Veg.Manag.	3
224	MiddleAged	Woman	Urban	NO	Low	2.Veg.Manag.	3
237	MiddleAged	Woman	Urban	NO	Medium	2.Veg.Manag.	3
238	MiddleAged	Woman	Urban	NO	High	2.Veg.Manag.	3
239	MiddleAged	Man	Urban	NO	Medium	2.Veg.Manag.	3
245	MiddleAged	Woman	Urban	YES	Medium	2.Veg.Manag.	3
247	MiddleAged	Woman	Urban	NO	High	2.Veg.Manag.	3
249	MiddleAged	Man	Urban	YES	Medium	2.Veg.Manag.	3
255	MiddleAged	Man	Urban	YES	Medium	2.Veg.Manag.	3
257	MiddleAged	Woman	Urban	NO	Medium	2.Veg.Manag.	3
291	MiddleAged	Man	Urban	NO	Medium	2.Veg.Manag.	3
297	MiddleAged	Man	Urban	YES	Medium	2.Veg.Manag.	3
299	MiddleAged	Man	Urban	YES	High	2.Veg.Manag.	3
315	MiddleAged	Man	Urban	NO	Medium	2.Veg.Manag.	3
325	MiddleAged	Man	Urban	NO	Medium	2.Veg.Manag.	3
328	MiddleAged	Woman	Urban	YES	Medium	2.Veg.Manag.	3
333	MiddleAged	Woman	Urban	NO	Medium	2.Veg.Manag.	3
337	MiddleAged	Woman	Urban	NO	Medium	2.Veg.Manag.	3
340	MiddleAged	Woman	Urban	NO	Medium	2.Veg.Manag.	3
344	MiddleAged	Woman	Urban	NO	Medium	2.Veg.Manag.	3
345	MiddleAged	Woman	Urban	YES	High	2.Veg.Manag.	3
3	MiddleAged	Man	Urban	YES	Medium	2.Veg.Manag.	2
11	MiddleAged	Man	Urban	YES	Medium	2.Veg.Manag.	2
15	MiddleAged	Woman	Urban	YES	Medium	2.Veg.Manag.	2
20	MiddleAged	Woman	Urban	NO	Medium	2.Veg.Manag.	2
24	MiddleAged	Woman	Urban	YES	Medium	2.Veg.Manag.	2
25	MiddleAged	Man	Urban	NO	Medium	2.Veg.Manag.	2
63	MiddleAged	Man	Urban	YES	High	2.Veg.Manag.	2
76	MiddleAged	Woman	Urban	NO	Medium	2.Veg.Manag.	2
78	MiddleAged	Woman	Urban	NO	Medium	2.Veg.Manag.	2
81	MiddleAged	Man	Urban	NO	Low	2.Veg.Manag.	2
82	MiddleAged	Man	Urban	YES	Medium	2.Veg.Manag.	2
88	MiddleAged	Woman	Urban	YES	High	2.Veg.Manag.	2
92	MiddleAged	Man	Urban	YES	Medium	2.Veg.Manag.	2
94	MiddleAged	Man	Urban	NO	Low	2.Veg.Manag.	2
96	MiddleAged	Woman	Urban	NO	Medium	2.Veg.Manag.	2
106	MiddleAged	Man	Urban	NO	Medium	2.Veg.Manag.	2
115	MiddleAged	Woman	Urban	NO	High	2.Veg.Manag.	2
119	MiddleAged	Woman	Urban	NO	Medium	2.Veg.Manag.	2
121	MiddleAged	Woman	Urban	NO	Medium	2.Veg.Manag.	2
143	MiddleAged	Man	Urban	NO	Medium	2.Veg.Manag.	2
151	MiddleAged	Woman	Urban	NO	Medium	2.Veg.Manag.	2
162	MiddleAged	Woman	Urban	NO	Medium	2.Veg.Manag.	2
169	MiddleAged	Woman	Urban	NO	Medium	2.Veg.Manag.	2
191	MiddleAged	Woman	Urban	YES	Medium	2.Veg.Manag.	2
198	MiddleAged	Man	Urban	YES	Medium	2.Veg.Manag.	2
208	MiddleAged	Man	Urban	YES	High	2.Veg.Manag.	2
210	MiddleAged	Man	Urban	YES	High	2.Veg.Manag.	2
211	MiddleAged	Woman	Urban	YES	High	2.Veg.Manag.	2
212	MiddleAged	Woman	Urban	NO	Medium	2.Veg.Manag.	2
214	MiddleAged	Man	Urban	NO	Medium	2.Veg.Manag.	2
217	MiddleAged	Man	Urban	YES	Medium	2.Veg.Manag.	2
236	MiddleAged	Man	Urban	NO	Medium	2.Veg.Manag.	2
250	MiddleAged	Man	Urban	NO	Medium	2.Veg.Manag.	2
263	MiddleAged	Woman	Urban	NO	Low	2.Veg.Manag.	2
274	MiddleAged	Man	Urban	NO	Medium	2.Veg.Manag.	2
284	MiddleAged	Woman	Urban	NO	Medium	2.Veg.Manag.	2
287	MiddleAged	Man	Urban	NO	Low	2.Veg.Manag.	2
292	MiddleAged	Woman	Urban	NO	Low	2.Veg.Manag.	2
302	MiddleAged	Woman	Urban	YES	Medium	2.Veg.Manag.	2
313	MiddleAged	Man	Urban	NO	Medium	2.Veg.Manag.	2
318	MiddleAged	Woman	Urban	YES	Medium	2.Veg.Manag.	2
336	MiddleAged	Woman	Urban	YES	Medium	2.Veg.Manag.	2
301	MiddleAged	Man	Urban	NO	Medium	2.Veg.Manag.	1
60	Senior	Woman	Urban	NO	Medium	2.Veg.Manag.	4
91	Senior	Man	Urban	NO	Low	2.Veg.Manag.	4
166	Senior	Woman	Urban	NO	Low	2.Veg.Manag.	4
207	Senior	Woman	Urban	NO	Low	2.Veg.Manag.	4
256	Senior	Woman	Urban	YES	Low	2.Veg.Manag.	4
22	Senior	Man	Urban	NO	Low	2.Veg.Manag.	3
30	Senior	Woman	Urban	NO	Low	2.Veg.Manag.	3
59	Senior	Woman	Urban	NO	Low	2.Veg.Manag.	3
61	Senior	Man	Urban	NO	Low	2.Veg.Manag.	3
86	Senior	Man	Urban	NO	High	2.Veg.Manag.	3
122	Senior	Man	Urban	NO	Low	2.Veg.Manag.	3
158	Senior	Man	Urban	NO	Low	2.Veg.Manag.	3
163	Senior	Woman	Urban	NO	Medium	2.Veg.Manag.	3
183	Senior	Woman	Urban	NO	Low	2.Veg.Manag.	3
187	Senior	Woman	Urban	NO	Medium	2.Veg.Manag.	3
201	Senior	Woman	Urban	YES	Medium	2.Veg.Manag.	3
269	Senior	Woman	Urban	YES	High	2.Veg.Manag.	3
272	Senior	Woman	Urban	YES	High	2.Veg.Manag.	3
295	Senior	Woman	Urban	YES	Medium	2.Veg.Manag.	3
312	Senior	Woman	Urban	NO	Low	2.Veg.Manag.	3
326	Senior	Woman	Urban	NO	Low	2.Veg.Manag.	3
8	Senior	Man	Urban	NO	Low	2.Veg.Manag.	2
49	Senior	Woman	Urban	NO	Medium	2.Veg.Manag.	2
71	Senior	Man	Urban	NO	Low	2.Veg.Manag.	2
84	Senior	Man	Urban	NO	Medium	2.Veg.Manag.	2
99	Senior	Man	Urban	NO	Low	2.Veg.Manag.	2
102	Senior	Woman	Urban	YES	Medium	2.Veg.Manag.	2
112	Senior	Man	Urban	NO	Low	2.Veg.Manag.	2
113	Senior	Woman	Urban	NO	Medium	2.Veg.Manag.	2
135	Senior	Man	Urban	YES	Medium	2.Veg.Manag.	2
139	Senior	Man	Urban	NO	Medium	2.Veg.Manag.	2
171	Senior	Man	Urban	NO	Low	2.Veg.Manag.	2
176	Senior	Woman	Urban	NO	Low	2.Veg.Manag.	2
178	Senior	Woman	Urban	NO	Low	2.Veg.Manag.	2
181	Senior	Man	Urban	NO	Medium	2.Veg.Manag.	2
194	Senior	Woman	Urban	NO	Low	2.Veg.Manag.	2
229	Senior	Man	Urban	YES	Low	2.Veg.Manag.	2
252	Senior	Woman	Urban	YES	Medium	2.Veg.Manag.	2
253	Senior	Man	Urban	NO	Low	2.Veg.Manag.	2
266	Senior	Woman	Urban	NO	Low	2.Veg.Manag.	2
271	Senior	Woman	Urban	NO	Low	2.Veg.Manag.	2
303	Senior	Woman	Urban	NO	Low	2.Veg.Manag.	2
304	Senior	Woman	Urban	NO	Low	2.Veg.Manag.	2
317	Senior	Woman	Urban	NO	Medium	2.Veg.Manag.	2
321	Senior	Man	Urban	NO	Medium	2.Veg.Manag.	2
29	Young	Woman	Rural	YES	High	2.Veg.Manag.	4
28	Young	Man	Rural	YES	Medium	2.Veg.Manag.	3
199	Young	Woman	Rural	YES	Medium	2.Veg.Manag.	3
331	Young	Woman	Rural	YES	High	2.Veg.Manag.	3
19	Young	Woman	Rural	YES	High	2.Veg.Manag.	2
56	Young	Man	Rural	YES	High	2.Veg.Manag.	2
89	Young	Woman	Rural	NO	Medium	2.Veg.Manag.	2
311	Young	Woman	Rural	YES	Medium	2.Veg.Manag.	2
69	MiddleAged	Woman	Rural	YES	Low	2.Veg.Manag.	4
285	MiddleAged	Woman	Rural	YES	Medium	2.Veg.Manag.	4
4	MiddleAged	Man	Rural	YES	High	2.Veg.Manag.	3
57	MiddleAged	Man	Rural	NO	Medium	2.Veg.Manag.	3
64	MiddleAged	Woman	Rural	YES	Medium	2.Veg.Manag.	3
111	MiddleAged	Woman	Rural	YES	Medium	2.Veg.Manag.	3
140	MiddleAged	Man	Rural	YES	Medium	2.Veg.Manag.	3
161	MiddleAged	Woman	Rural	YES	Medium	2.Veg.Manag.	3
186	MiddleAged	Woman	Rural	YES	Medium	2.Veg.Manag.	3
204	MiddleAged	Woman	Rural	YES	Medium	2.Veg.Manag.	3
218	MiddleAged	Woman	Rural	YES	Medium	2.Veg.Manag.	3
39	MiddleAged	Man	Rural	NO	Medium	2.Veg.Manag.	2
43	MiddleAged	Man	Rural	NO	Medium	2.Veg.Manag.	2
48	MiddleAged	Man	Rural	NO	Medium	2.Veg.Manag.	2
107	MiddleAged	Man	Rural	YES	High	2.Veg.Manag.	2
144	MiddleAged	Man	Rural	YES	High	2.Veg.Manag.	2
197	MiddleAged	Man	Rural	YES	Medium	2.Veg.Manag.	2
305	MiddleAged	Woman	Rural	YES	Medium	2.Veg.Manag.	2
307	MiddleAged	Man	Rural	YES	Low	2.Veg.Manag.	2
309	MiddleAged	Man	Rural	YES	Medium	2.Veg.Manag.	2
[truncated: 1,796 more rows]

## Sheet: Question 3
Survey Number	Age	SEX	Residence	Outdoor Activities	Educational level	Vegetation Type	Score
129	MiddleAged	Man	Urban	NO	High	3.Agricult	4
288	Young	Woman	Urban	NO	High	3.Agricult	3
324	Young	Man	Urban	NO	High	3.Agricult	3
86	Senior	Man	Urban	NO	High	3.Agricult	2
115	MiddleAged	Woman	Urban	NO	High	3.Agricult	2
128	MiddleAged	Man	Urban	NO	High	3.Agricult	2
141	MiddleAged	Woman	Urban	NO	High	3.Agricult	2
142	Young	Woman	Urban	NO	High	3.Agricult	2
147	MiddleAged	Man	Urban	NO	High	3.Agricult	2
150	MiddleAged	Woman	Urban	NO	High	3.Agricult	2
167	Young	Man	Urban	NO	High	3.Agricult	2
222	MiddleAged	Woman	Urban	NO	High	3.Agricult	2
261	Young	Woman	Urban	NO	High	3.Agricult	2
66	MiddleAged	Woman	Urban	NO	High	3.Agricult	1
72	Young	Man	Urban	NO	High	3.Agricult	1
118	MiddleAged	Man	Urban	NO	High	3.Agricult	1
185	Young	Man	Urban	NO	High	3.Agricult	1
235	Young	Woman	Urban	NO	High	3.Agricult	1
238	MiddleAged	Woman	Urban	NO	High	3.Agricult	1
247	MiddleAged	Woman	Urban	NO	High	3.Agricult	1
273	Young	Woman	Urban	NO	High	3.Agricult	1
21	MiddleAged	Man	Urban	NO	High	3.Agricult	1
10	Young	Man	Urban	YES	High	3.Agricult	3
56	Young	Man	Rural	YES	High	3.Agricult	3
97	Young	Woman	Urban	YES	High	3.Agricult	3
104	MiddleAged	Man	Urban	YES	High	3.Agricult	3
107	MiddleAged	Man	Rural	YES	High	3.Agricult	3
116	Young	Man	Urban	YES	High	3.Agricult	3
136	Young	Woman	Urban	YES	High	3.Agricult	3
145	Young	Woman	Urban	YES	High	3.Agricult	3
231	Young	Woman	Urban	YES	High	3.Agricult	3
282	Young	Man	Urban	YES	High	3.Agricult	3
314	MiddleAged	Man	Urban	YES	High	3.Agricult	3
332	Young	Man	Urban	YES	High	3.Agricult	3
16	Young	Woman	Urban	YES	High	3.Agricult	2
19	Young	Woman	Rural	YES	High	3.Agricult	2
38	Young	Woman	Urban	YES	High	3.Agricult	2
53	Senior	Woman	Rural	YES	High	3.Agricult	2
63	MiddleAged	Man	Urban	YES	High	3.Agricult	2
88	MiddleAged	Woman	Urban	YES	High	3.Agricult	2
108	Young	Man	Urban	YES	High	3.Agricult	2
137	MiddleAged	Woman	Urban	YES	High	3.Agricult	2
144	MiddleAged	Man	Rural	YES	High	3.Agricult	2
156	Young	Man	Urban	YES	High	3.Agricult	2
179	Young	Woman	Urban	YES	High	3.Agricult	2
202	Young	Woman	Urban	YES	High	3.Agricult	2
211	MiddleAged	Woman	Urban	YES	High	3.Agricult	2
221	MiddleAged	Woman	Urban	YES	High	3.Agricult	2
243	Young	Man	Urban	YES	High	3.Agricult	2
248	Young	Woman	Urban	YES	High	3.Agricult	2
259	Young	Man	Urban	YES	High	3.Agricult	2
308	Young	Man	Urban	YES	High	3.Agricult	2
338	Young	Man	Urban	YES	High	3.Agricult	2
341	Young	Woman	Urban	YES	High	3.Agricult	2
345	MiddleAged	Woman	Urban	YES	High	3.Agricult	2
27	Young	Man	Urban	YES	High	3.Agricult	1
29	Young	Woman	Rural	YES	High	3.Agricult	1
40	Young	Woman	Urban	YES	High	3.Agricult	1
41	Young	Woman	Urban	YES	High	3.Agricult	1
83	Young	Woman	Urban	YES	High	3.Agricult	1
85	Young	Woman	Urban	YES	High	3.Agricult	1
110	MiddleAged	Woman	Urban	YES	High	3.Agricult	1
125	Young	Woman	Urban	YES	High	3.Agricult	1
152	Young	Man	Urban	YES	High	3.Agricult	1
189	MiddleAged	Man	Urban	YES	High	3.Agricult	1
190	Young	Woman	Urban	YES	High	3.Agricult	1
196	MiddleAged	Woman	Urban	YES	High	3.Agricult	1
208	MiddleAged	Man	Urban	YES	High	3.Agricult	1
210	MiddleAged	Man	Urban	YES	High	3.Agricult	1
225	Young	Man	Urban	YES	High	3.Agricult	1
234	Young	Woman	Urban	YES	High	3.Agricult	1
268	Young	Woman	Urban	YES	High	3.Agricult	1
269	Senior	Woman	Urban	YES	High	3.Agricult	1
272	Senior	Woman	Urban	YES	High	3.Agricult	1
278	Young	Woman	Urban	YES	High	3.Agricult	1
299	MiddleAged	Man	Urban	YES	High	3.Agricult	1
300	MiddleAged	Woman	Urban	YES	High	3.Agricult	1
316	Young	Man	Urban	YES	High	3.Agricult	1
331	Young	Woman	Rural	YES	High	3.Agricult	1
342	Young	Man	Urban	YES	High	3.Agricult	1
4	MiddleAged	Man	Rural	YES	High	3.Agricult	1
129	MiddleAged	Man	Urban	NO	High	3.OakForest	4
86	Senior	Man	Urban	NO	High	3.OakForest	3
115	MiddleAged	Woman	Urban	NO	High	3.OakForest	3
118	MiddleAged	Man	Urban	NO	High	3.OakForest	3
128	MiddleAged	Man	Urban	NO	High	3.OakForest	3
141	MiddleAged	Woman	Urban	NO	High	3.OakForest	3
142	Young	Woman	Urban	NO	High	3.OakForest	3
150	MiddleAged	Woman	Urban	NO	High	3.OakForest	3
167	Young	Man	Urban	NO	High	3.OakForest	3
185	Young	Man	Urban	NO	High	3.OakForest	3
222	MiddleAged	Woman	Urban	NO	High	3.OakForest	3
238	MiddleAged	Woman	Urban	NO	High	3.OakForest	3
247	MiddleAged	Woman	Urban	NO	High	3.OakForest	3
273	Young	Woman	Urban	NO	High	3.OakForest	3
324	Young	Man	Urban	NO	High	3.OakForest	3
72	Young	Man	Urban	NO	High	3.OakForest	2
147	MiddleAged	Man	Urban	NO	High	3.OakForest	2
235	Young	Woman	Urban	NO	High	3.OakForest	2
261	Young	Woman	Urban	NO	High	3.OakForest	2
66	MiddleAged	Woman	Urban	NO	High	3.OakForest	1
288	Young	Woman	Urban	NO	High	3.OakForest	1
21	MiddleAged	Man	Urban	NO	High	3.OakForest	3
272	Senior	Woman	Urban	YES	High	3.OakForest	4
341	Young	Woman	Urban	YES	High	3.OakForest	4
10	Young	Man	Urban	YES	High	3.OakForest	3
19	Young	Woman	Rural	YES	High	3.OakForest	3
27	Young	Man	Urban	YES	High	3.OakForest	3
38	Young	Woman	Urban	YES	High	3.OakForest	3
40	Young	Woman	Urban	YES	High	3.OakForest	3
41	Young	Woman	Urban	YES	High	3.OakForest	3
53	Senior	Woman	Rural	YES	High	3.OakForest	3
56	Young	Man	Rural	YES	High	3.OakForest	3
83	Young	Woman	Urban	YES	High	3.OakForest	3
85	Young	Woman	Urban	YES	High	3.OakForest	3
88	MiddleAged	Woman	Urban	YES	High	3.OakForest	3
97	Young	Woman	Urban	YES	High	3.OakForest	3
108	Young	Man	Urban	YES	High	3.OakForest	3
125	Young	Woman	Urban	YES	High	3.OakForest	3
137	MiddleAged	Woman	Urban	YES	High	3.OakForest	3
156	Young	Man	Urban	YES	High	3.OakForest	3
189	MiddleAged	Man	Urban	YES	High	3.OakForest	3
190	Young	Woman	Urban	YES	High	3.OakForest	3
211	MiddleAged	Woman	Urban	YES	High	3.OakForest	3
221	MiddleAged	Woman	Urban	YES	High	3.OakForest	3
225	Young	Man	Urban	YES	High	3.OakForest	3
259	Young	Man	Urban	YES	High	3.OakForest	3
314	MiddleAged	Man	Urban	YES	High	3.OakForest	3
316	Young	Man	Urban	YES	High	3.OakForest	3
16	Young	Woman	Urban	YES	High	3.OakForest	2
29	Young	Woman	Rural	YES	High	3.OakForest	2
104	MiddleAged	Man	Urban	YES	High	3.OakForest	2
107	MiddleAged	Man	Rural	YES	High	3.OakForest	2
110	MiddleAged	Woman	Urban	YES	High	3.OakForest	2
116	Young	Man	Urban	YES	High	3.OakForest	2
144	MiddleAged	Man	Rural	YES	High	3.OakForest	2
179	Young	Woman	Urban	YES	High	3.OakForest	2
196	MiddleAged	Woman	Urban	YES	High	3.OakForest	2
202	Young	Woman	Urban	YES	High	3.OakForest	2
208	MiddleAged	Man	Urban	YES	High	3.OakForest	2
210	MiddleAged	Man	Urban	YES	High	3.OakForest	2
231	Young	Woman	Urban	YES	High	3.OakForest	2
234	Young	Woman	Urban	YES	High	3.OakForest	2
243	Young	Man	Urban	YES	High	3.OakForest	2
248	Young	Woman	Urban	YES	High	3.OakForest	2
268	Young	Woman	Urban	YES	High	3.OakForest	2
269	Senior	Woman	Urban	YES	High	3.OakForest	2
278	Young	Woman	Urban	YES	High	3.OakForest	2
299	MiddleAged	Man	Urban	YES	High	3.OakForest	2
300	MiddleAged	Woman	Urban	YES	High	3.OakForest	2
308	Young	Man	Urban	YES	High	3.OakForest	2
331	Young	Woman	Rural	YES	High	3.OakForest	2
332	Young	Man	Urban	YES	High	3.OakForest	2
342	Young	Man	Urban	YES	High	3.OakForest	2
63	MiddleAged	Man	Urban	YES	High	3.OakForest	1
136	Young	Woman	Urban	YES	High	3.OakForest	1
145	Young	Woman	Urban	YES	High	3.OakForest	1
152	Young	Man	Urban	YES	High	3.OakForest	1
282	Young	Man	Urban	YES	High	3.OakForest	1
338	Young	Man	Urban	YES	High	3.OakForest	1
345	MiddleAged	Woman	Urban	YES	High	3.OakForest	1
4	MiddleAged	Man	Rural	YES	High	3.OakForest	1
118	MiddleAged	Man	Urban	NO	High	3.Eucalypt Pl.	4
128	MiddleAged	Man	Urban	NO	High	3.Eucalypt Pl.	4
150	MiddleAged	Woman	Urban	NO	High	3.Eucalypt Pl.	4
222	MiddleAged	Woman	Urban	NO	High	3.Eucalypt Pl.	4
235	Young	Woman	Urban	NO	High	3.Eucalypt Pl.	4
238	MiddleAged	Woman	Urban	NO	High	3.Eucalypt Pl.	4
288	Young	Woman	Urban	NO	High	3.Eucalypt Pl.	4
66	MiddleAged	Woman	Urban	NO	High	3.Eucalypt Pl.	3
72	Young	Man	Urban	NO	High	3.Eucalypt Pl.	3
86	Senior	Man	Urban	NO	High	3.Eucalypt Pl.	3
115	MiddleAged	Woman	Urban	NO	High	3.Eucalypt Pl.	3
129	MiddleAged	Man	Urban	NO	High	3.Eucalypt Pl.	3
141	MiddleAged	Woman	Urban	NO	High	3.Eucalypt Pl.	3
142	Young	Woman	Urban	NO	High	3.Eucalypt Pl.	3
147	MiddleAged	Man	Urban	NO	High	3.Eucalypt Pl.	3
167	Young	Man	Urban	NO	High	3.Eucalypt Pl.	3
185	Young	Man	Urban	NO	High	3.Eucalypt Pl.	3
247	MiddleAged	Woman	Urban	NO	High	3.Eucalypt Pl.	3
261	Young	Woman	Urban	NO	High	3.Eucalypt Pl.	3
273	Young	Woman	Urban	NO	High	3.Eucalypt Pl.	3
324	Young	Man	Urban	NO	High	3.Eucalypt Pl.	3
21	MiddleAged	Man	Urban	NO	High	3.Eucalypt Pl.	3
27	Young	Man	Urban	YES	High	3.Eucalypt Pl.	4
38	Young	Woman	Urban	YES	High	3.Eucalypt Pl.	4
41	Young	Woman	Urban	YES	High	3.Eucalypt Pl.	4
53	Senior	Woman	Rural	YES	High	3.Eucalypt Pl.	4
83	Young	Woman	Urban	YES	High	3.Eucalypt Pl.	4
88	MiddleAged	Woman	Urban	YES	High	3.Eucalypt Pl.	4
107	MiddleAged	Man	Rural	YES	High	3.Eucalypt Pl.	4
110	MiddleAged	Woman	Urban	YES	High	3.Eucalypt Pl.	4
136	Young	Woman	Urban	YES	High	3.Eucalypt Pl.	4
144	MiddleAged	Man	Rural	YES	High	3.Eucalypt Pl.	4
156	Young	Man	Urban	YES	High	3.Eucalypt Pl.	4
190	Young	Woman	Urban	YES	High	3.Eucalypt Pl.	4
225	Young	Man	Urban	YES	High	3.Eucalypt Pl.	4
248	Young	Woman	Urban	YES	High	3.Eucalypt Pl.	4
259	Young	Man	Urban	YES	High	3.Eucalypt Pl.	4
269	Senior	Woman	Urban	YES	High	3.Eucalypt Pl.	4
272	Senior	Woman	Urban	YES	High	3.Eucalypt Pl.	4
282	Young	Man	Urban	YES	High	3.Eucalypt Pl.	4
342	Young	Man	Urban	YES	High	3.Eucalypt Pl.	4
345	MiddleAged	Woman	Urban	YES	High	3.Eucalypt Pl.	4
10	Young	Man	Urban	YES	High	3.Eucalypt Pl.	3
19	Young	Woman	Rural	YES	High	3.Eucalypt Pl.	3
29	Young	Woman	Rural	YES	High	3.Eucalypt Pl.	3
40	Young	Woman	Urban	YES	High	3.Eucalypt Pl.	3
56	Young	Man	Rural	YES	High	3.Eucalypt Pl.	3
63	MiddleAged	Man	Urban	YES	High	3.Eucalypt Pl.	3
85	Young	Woman	Urban	YES	High	3.Eucalypt Pl.	3
97	Young	Woman	Urban	YES	High	3.Eucalypt Pl.	3
104	MiddleAged	Man	Urban	YES	High	3.Eucalypt Pl.	3
108	Young	Man	Urban	YES	High	3.Eucalypt Pl.	3
116	Young	Man	Urban	YES	High	3.Eucalypt Pl.	3
125	Young	Woman	Urban	YES	High	3.Eucalypt Pl.	3
137	MiddleAged	Woman	Urban	YES	High	3.Eucalypt Pl.	3
145	Young	Woman	Urban	YES	High	3.Eucalypt Pl.	3
152	Young	Man	Urban	YES	High	3.Eucalypt Pl.	3
179	Young	Woman	Urban	YES	High	3.Eucalypt Pl.	3
189	MiddleAged	Man	Urban	YES	High	3.Eucalypt Pl.	3
196	MiddleAged	Woman	Urban	YES	High	3.Eucalypt Pl.	3
202	Young	Woman	Urban	YES	High	3.Eucalypt Pl.	3
208	MiddleAged	Man	Urban	YES	High	3.Eucalypt Pl.	3
210	MiddleAged	Man	Urban	YES	High	3.Eucalypt Pl.	3
211	MiddleAged	Woman	Urban	YES	High	3.Eucalypt Pl.	3
221	MiddleAged	Woman	Urban	YES	High	3.Eucalypt Pl.	3
231	Young	Woman	Urban	YES	High	3.Eucalypt Pl.	3
243	Young	Man	Urban	YES	High	3.Eucalypt Pl.	3
268	Young	Woman	Urban	YES	High	3.Eucalypt Pl.	3
299	MiddleAged	Man	Urban	YES	High	3.Eucalypt Pl.	3
300	MiddleAged	Woman	Urban	YES	High	3.Eucalypt Pl.	3
308	Young	Man	Urban	YES	High	3.Eucalypt Pl.	3
314	MiddleAged	Man	Urban	YES	High	3.Eucalypt Pl.	3
316	Young	Man	Urban	YES	High	3.Eucalypt Pl.	3
331	Young	Woman	Rural	YES	High	3.Eucalypt Pl.	3
332	Young	Man	Urban	YES	High	3.Eucalypt Pl.	3
338	Young	Man	Urban	YES	High	3.Eucalypt Pl.	3
341	Young	Woman	Urban	YES	High	3.Eucalypt Pl.	3
16	Young	Woman	Urban	YES	High	3.Eucalypt Pl.	2
234	Young	Woman	Urban	YES	High	3.Eucalypt Pl.	1
278	Young	Woman	Urban	YES	High	3.Eucalypt Pl.	1
4	MiddleAged	Man	Rural	YES	High	3.Eucalypt Pl.	3
115	MiddleAged	Woman	Urban	NO	High	3.Mixed forest	3
118	MiddleAged	Man	Urban	NO	High	3.Mixed forest	3
128	MiddleAged	Man	Urban	NO	High	3.Mixed forest	3
129	MiddleAged	Man	Urban	NO	High	3.Mixed forest	3
141	MiddleAged	Woman	Urban	NO	High	3.Mixed forest	3
142	Young	Woman	Urban	NO	High	3.Mixed forest	3
147	MiddleAged	Man	Urban	NO	High	3.Mixed forest	3
150	MiddleAged	Woman	Urban	NO	High	3.Mixed forest	3
167	Young	Man	Urban	NO	High	3.Mixed forest	3
222	MiddleAged	Woman	Urban	NO	High	3.Mixed forest	3
247	MiddleAged	Woman	Urban	NO	High	3.Mixed forest	3
261	Young	Woman	Urban	NO	High	3.Mixed forest	3
288	Young	Woman	Urban	NO	High	3.Mixed forest	3
324	Young	Man	Urban	NO	High	3.Mixed forest	3
66	MiddleAged	Woman	Urban	NO	High	3.Mixed forest	2
72	Young	Man	Urban	NO	High	3.Mixed forest	2
86	Senior	Man	Urban	NO	High	3.Mixed forest	2
185	Young	Man	Urban	NO	High	3.Mixed forest	2
235	Young	Woman	Urban	NO	High	3.Mixed forest	2
238	MiddleAged	Woman	Urban	NO	High	3.Mixed forest	2
273	Young	Woman	Urban	NO	High	3.Mixed forest	2
21	MiddleAged	Man	Urban	NO	High	3.Mixed forest	4
16	Young	Woman	Urban	YES	High	3.Mixed forest	4
27	Young	Man	Urban	YES	High	3.Mixed forest	4
53	Senior	Woman	Rural	YES	High	3.Mixed forest	4
83	Young	Woman	Urban	YES	High	3.Mixed forest	4
107	MiddleAged	Man	Rural	YES	High	3.Mixed forest	4
137	MiddleAged	Woman	Urban	YES	High	3.Mixed forest	4
144	MiddleAged	Man	Rural	YES	High	3.Mixed forest	4
156	Young	Man	Urban	YES	High	3.Mixed forest	4
221	MiddleAged	Woman	Urban	YES	High	3.Mixed forest	4
225	Young	Man	Urban	YES	High	3.Mixed forest	4
248	Young	Woman	Urban	YES	High	3.Mixed forest	4
314	MiddleAged	Man	Urban	YES	High	3.Mixed forest	4
338	Young	Man	Urban	YES	High	3.Mixed forest	4
341	Young	Woman	Urban	YES	High	3.Mixed forest	4
345	MiddleAged	Woman	Urban	YES	High	3.Mixed forest	4
10	Young	Man	Urban	YES	High	3.Mixed forest	3
19	Young	Woman	Rural	YES	High	3.Mixed forest	3
38	Young	Woman	Urban	YES	High	3.Mixed forest	3
41	Young	Woman	Urban	YES	High	3.Mixed forest	3
56	Young	Man	Rural	YES	High	3.Mixed forest	3
88	MiddleAged	Woman	Urban	YES	High	3.Mixed forest	3
97	Young	Woman	Urban	YES	High	3.Mixed forest	3
104	MiddleAged	Man	Urban	YES	High	3.Mixed forest	3
108	Young	Man	Urban	YES	High	3.Mixed forest	3
110	MiddleAged	Woman	Urban	YES	High	3.Mixed forest	3
116	Young	Man	Urban	YES	High	3.Mixed forest	3
136	Young	Woman	Urban	YES	High	3.Mixed forest	3
152	Young	Man	Urban	YES	High	3.Mixed forest	3
179	Young	Woman	Urban	YES	High	3.Mixed forest	3
189	MiddleAged	Man	Urban	YES	High	3.Mixed forest	3
190	Young	Woman	Urban	YES	High	3.Mixed forest	3
196	MiddleAged	Woman	Urban	YES	High	3.Mixed forest	3
202	Young	Woman	Urban	YES	High	3.Mixed forest	3
208	MiddleAged	Man	Urban	YES	High	3.Mixed forest	3
210	MiddleAged	Man	Urban	YES	High	3.Mixed forest	3
211	MiddleAged	Woman	Urban	YES	High	3.Mixed forest	3
231	Young	Woman	Urban	YES	High	3.Mixed forest	3
243	Young	Man	Urban	YES	High	3.Mixed forest	3
259	Young	Man	Urban	YES	High	3.Mixed forest	3
268	Young	Woman	Urban	YES	High	3.Mixed forest	3
269	Senior	Woman	Urban	YES	High	3.Mixed forest	3
282	Young	Man	Urban	YES	High	3.Mixed forest	3
299	MiddleAged	Man	Urban	YES	High	3.Mixed forest	3
300	MiddleAged	Woman	Urban	YES	High	3.Mixed forest	3
308	Young	Man	Urban	YES	High	3.Mixed forest	3
331	Young	Woman	Rural	YES	High	3.Mixed forest	3
332	Young	Man	Urban	YES	High	3.Mixed forest	3
342	Young	Man	Urban	YES	High	3.Mixed forest	3
29	Young	Woman	Rural	YES	High	3.Mixed forest	2
40	Young	Woman	Urban	YES	High	3.Mixed forest	2
63	MiddleAged	Man	Urban	YES	High	3.Mixed forest	2
85	Young	Woman	Urban	YES	High	3.Mixed forest	2
125	Young	Woman	Urban	YES	High	3.Mixed forest	2
145	Young	Woman	Urban	YES	High	3.Mixed forest	2
234	Young	Woman	Urban	YES	High	3.Mixed forest	2
272	Senior	Woman	Urban	YES	High	3.Mixed forest	2
278	Young	Woman	Urban	YES	High	3.Mixed forest	2
316	Young	Man	Urban	YES	High	3.Mixed forest	2
4	MiddleAged	Man	Rural	YES	High	3.Mixed forest	3
66	MiddleAged	Woman	Urban	NO	High	3.Shrubland	4
72	Young	Man	Urban	NO	High	3.Shrubland	4
115	MiddleAged	Woman	Urban	NO	High	3.Shrubland	4
129	MiddleAged	Man	Urban	NO	High	3.Shrubland	4
142	Young	Woman	Urban	NO	High	3.Shrubland	4
147	MiddleAged	Man	Urban	NO	High	3.Shrubland	4
150	MiddleAged	Woman	Urban	NO	High	3.Shrubland	4
235	Young	Woman	Urban	NO	High	3.Shrubland	4
247	MiddleAged	Woman	Urban	NO	High	3.Shrubland	4
261	Young	Woman	Urban	NO	High	3.Shrubland	4
288	Young	Woman	Urban	NO	High	3.Shrubland	4
324	Young	Man	Urban	NO	High	3.Shrubland	4
86	Senior	Man	Urban	NO	High	3.Shrubland	3
118	MiddleAged	Man	Urban	NO	High	3.Shrubland	3
128	MiddleAged	Man	Urban	NO	High	3.Shrubland	3
167	Young	Man	Urban	NO	High	3.Shrubland	3
222	MiddleAged	Woman	Urban	NO	High	3.Shrubland	3
141	MiddleAged	Woman	Urban	NO	High	3.Shrubland	2
238	MiddleAged	Woman	Urban	NO	High	3.Shrubland	2
185	Young	Man	Urban	NO	High	3.Shrubland	1
273	Young	Woman	Urban	NO	High	3.Shrubland	1
21	MiddleAged	Man	Urban	NO	High	3.Shrubland	4
10	Young	Man	Urban	YES	High	3.Shrubland	4
19	Young	Woman	Rural	YES	High	3.Shrubland	4
29	Young	Woman	Rural	YES	High	3.Shrubland	4
38	Young	Woman	Urban	YES	High	3.Shrubland	4
63	MiddleAged	Man	Urban	YES	High	3.Shrubland	4
83	Young	Woman	Urban	YES	High	3.Shrubland	4
85	Young	Woman	Urban	YES	High	3.Shrubland	4
88	MiddleAged	Woman	Urban	YES	High	3.Shrubland	4
97	Young	Woman	Urban	YES	High	3.Shrubland	4
107	MiddleAged	Man	Rural	YES	High	3.Shrubland	4
116	Young	Man	Urban	YES	High	3.Shrubland	4
136	Young	Woman	Urban	YES	High	3.Shrubland	4
144	MiddleAged	Man	Rural	YES	High	3.Shrubland	4
145	Young	Woman	Urban	YES	High	3.Shrubland	4
152	Young	Man	Urban	YES	High	3.Shrubland	4
156	Young	Man	Urban	YES	High	3.Shrubland	4
179	Young	Woman	Urban	YES	High	3.Shrubland	4
202	Young	Woman	Urban	YES	High	3.Shrubland	4
208	MiddleAged	Man	Urban	YES	High	3.Shrubland	4
210	MiddleAged	Man	Urban	YES	High	3.Shrubland	4
211	MiddleAged	Woman	Urban	YES	High	3.Shrubland	4
231	Young	Woman	Urban	YES	High	3.Shrubland	4
243	Young	Man	Urban	YES	High	3.Shrubland	4
259	Young	Man	Urban	YES	High	3.Shrubland	4
268	Young	Woman	Urban	YES	High	3.Shrubland	4
272	Senior	Woman	Urban	YES	High	3.Shrubland	4
308	Young	Man	Urban	YES	High	3.Shrubland	4
314	MiddleAged	Man	Urban	YES	High	3.Shrubland	4
316	Young	Man	Urban	YES	High	3.Shrubland	4
331	Young	Woman	Rural	YES	High	3.Shrubland	4
332	Young	Man	Urban	YES	High	3.Shrubland	4
342	Young	Man	Urban	YES	High	3.Shrubland	4
345	MiddleAged	Woman	Urban	YES	High	3.Shrubland	4
27	Young	Man	Urban	YES	High	3.Shrubland	3
41	Young	Woman	Urban	YES	High	3.Shrubland	3
53	Senior	Woman	Rural	YES	High	3.Shrubland	3
56	Young	Man	Rural	YES	High	3.Shrubland	3
104	MiddleAged	Man	Urban	YES	High	3.Shrubland	3
108	Young	Man	Urban	YES	High	3.Shrubland	3
110	MiddleAged	Woman	Urban	YES	High	3.Shrubland	3
137	MiddleAged	Woman	Urban	YES	High	3.Shrubland	3
189	MiddleAged	Man	Urban	YES	High	3.Shrubland	3
190	Young	Woman	Urban	YES	High	3.Shrubland	3
196	MiddleAged	Woman	Urban	YES	High	3.Shrubland	3
221	MiddleAged	Woman	Urban	YES	High	3.Shrubland	3
225	Young	Man	Urban	YES	High	3.Shrubland	3
234	Young	Woman	Urban	YES	High	3.Shrubland	3
248	Young	Woman	Urban	YES	High	3.Shrubland	3
269	Senior	Woman	Urban	YES	High	3.Shrubland	3
278	Young	Woman	Urban	YES	High	3.Shrubland	3
300	MiddleAged	Woman	Urban	YES	High	3.Shrubland	3
341	Young	Woman	Urban	YES	High	3.Shrubland	3
16	Young	Woman	Urban	YES	High	3.Shrubland	2
40	Young	Woman	Urban	YES	High	3.Shrubland	2
125	Young	Woman	Urban	YES	High	3.Shrubland	2
282	Young	Man	Urban	YES	High	3.Shrubland	2
338	Young	Man	Urban	YES	High	3.Shrubland	2
299	MiddleAged	Man	Urban	YES	High	3.Shrubland	1
4	MiddleAged	Man	Rural	YES	High	3.Shrubland	3
72	Young	Man	Urban	NO	High	3.Pine Pl.	4
86	Senior	Man	Urban	NO	High	3.Pine Pl.	4
115	MiddleAged	Woman	Urban	NO	High	3.Pine Pl.	4
128	MiddleAged	Man	Urban	NO	High	3.Pine Pl.	4
129	MiddleAged	Man	Urban	NO	High	3.Pine Pl.	4
141	MiddleAged	Woman	Urban	NO	High	3.Pine Pl.	4
147	MiddleAged	Man	Urban	NO	High	3.Pine Pl.	4
150	MiddleAged	Woman	Urban	NO	High	3.Pine Pl.	4
167	Young	Man	Urban	NO	High	3.Pine Pl.	4
118	MiddleAged	Man	Urban	NO	High	3.Pine Pl.	3
142	Young	Woman	Urban	NO	High	3.Pine Pl.	3
222	MiddleAged	Woman	Urban	NO	High	3.Pine Pl.	3
235	Young	Woman	Urban	NO	High	3.Pine Pl.	3
238	MiddleAged	Woman	Urban	NO	High	3.Pine Pl.	3
247	MiddleAged	Woman	Urban	NO	High	3.Pine Pl.	3
261	Young	Woman	Urban	NO	High	3.Pine Pl.	3
288	Young	Woman	Urban	NO	High	3.Pine Pl.	3
324	Young	Man	Urban	NO	High	3.Pine Pl.	3
66	MiddleAged	Woman	Urban	NO	High	3.Pine Pl.	2
185	Young	Man	Urban	NO	High	3.Pine Pl.	2
273	Young	Woman	Urban	NO	High	3.Pine Pl.	2
21	MiddleAged	Man	Urban	NO	High	3.Pine Pl.	4
29	Young	Woman	Rural	YES	High	3.Pine Pl.	4
38	Young	Woman	Urban	YES	High	3.Pine Pl.	4
41	Young	Woman	Urban	YES	High	3.Pine Pl.	4
53	Senior	Woman	Rural	YES	High	3.Pine Pl.	4
88	MiddleAged	Woman	Urban	YES	High	3.Pine Pl.	4
104	MiddleAged	Man	Urban	YES	High	3.Pine Pl.	4
137	MiddleAged	Woman	Urban	YES	High	3.Pine Pl.	4
156	Young	Man	Urban	YES	High	3.Pine Pl.	4
189	MiddleAged	Man	Urban	YES	High	3.Pine Pl.	4
211	MiddleAged	Woman	Urban	YES	High	3.Pine Pl.	4
221	MiddleAged	Woman	Urban	YES	High	3.Pine Pl.	4
225	Young	Man	Urban	YES	High	3.Pine Pl.	4
248	Young	Woman	Urban	YES	High	3.Pine Pl.	4
272	Senior	Woman	Urban	YES	High	3.Pine Pl.	4
299	MiddleAged	Man	Urban	YES	High	3.Pine Pl.	4
341	Young	Woman	Urban	YES	High	3.Pine Pl.	4
10	Young	Man	Urban	YES	High	3.Pine Pl.	3
16	Young	Woman	Urban	YES	High	3.Pine Pl.	3
19	Young	Woman	Rural	YES	High	3.Pine Pl.	3
27	Young	Man	Urban	YES	High	3.Pine Pl.	3
40	Young	Woman	Urban	YES	High	3.Pine Pl.	3
56	Young	Man	Rural	YES	High	3.Pine Pl.	3
83	Young	Woman	Urban	YES	High	3.Pine Pl.	3
85	Young	Woman	Urban	YES	High	3.Pine Pl.	3
97	Young	Woman	Urban	YES	High	3.Pine Pl.	3
107	MiddleAged	Man	Rural	YES	High	3.Pine Pl.	3
108	Young	Man	Urban	YES	High	3.Pine Pl.	3
110	MiddleAged	Woman	Urban	YES	High	3.Pine Pl.	3
116	Young	Man	Urban	YES	High	3.Pine Pl.	3
125	Young	Woman	Urban	YES	High	3.Pine Pl.	3
136	Young	Woman	Urban	YES	High	3.Pine Pl.	3
144	MiddleAged	Man	Rural	YES	High	3.Pine Pl.	3
145	Young	Woman	Urban	YES	High	3.Pine Pl.	3
152	Young	Man	Urban	YES	High	3.Pine Pl.	3
179	Young	Woman	Urban	YES	High	3.Pine Pl.	3
190	Young	Woman	Urban	YES	High	3.Pine Pl.	3
196	MiddleAged	Woman	Urban	YES	High	3.Pine Pl.	3
202	Young	Woman	Urban	YES	High	3.Pine Pl.	3
208	MiddleAged	Man	Urban	YES	High	3.Pine Pl.	3
210	MiddleAged	Man	Urban	YES	High	3.Pine Pl.	3
231	Young	Woman	Urban	YES	High	3.Pine Pl.	3
234	Young	Woman	Urban	YES	High	3.Pine Pl.	3
243	Young	Man	Urban	YES	High	3.Pine Pl.	3
259	Young	Man	Urban	YES	High	3.Pine Pl.	3
268	Young	Woman	Urban	YES	High	3.Pine Pl.	3
269	Senior	Woman	Urban	YES	High	3.Pine Pl.	3
278	Young	Woman	Urban	YES	High	3.Pine Pl.	3
282	Young	Man	Urban	YES	High	3.Pine Pl.	3
300	MiddleAged	Woman	Urban	YES	High	3.Pine Pl.	3
308	Young	Man	Urban	YES	High	3.Pine Pl.	3
314	MiddleAged	Man	Urban	YES	High	3.Pine Pl.	3
316	Young	Man	Urban	YES	High	3.Pine Pl.	3
331	Young	Woman	Rural	YES	High	3.Pine Pl.	3
332	Young	Man	Urban	YES	High	3.Pine Pl.	3
338	Young	Man	Urban	YES	High	3.Pine Pl.	3
342	Young	Man	Urban	YES	High	3.Pine Pl.	3
345	MiddleAged	Woman	Urban	YES	High	3.Pine Pl.	3
63	MiddleAged	Man	Urban	YES	High	3.Pine Pl.	2
4	MiddleAged	Man	Rural	YES	High	3.Pine Pl.	4
303	Senior	Woman	Urban	NO	Low	3.Agricult	4
7	Senior	Woman	Rural	NO	Low	3.Agricult	3
26	MiddleAged	Woman	Urban	NO	Low	3.Agricult	3
30	Senior	Woman	Urban	NO	Low	3.Agricult	3
33	Senior	Man	Rural	NO	Low	3.Agricult	3
50	Senior	Woman	Rural	NO	Low	3.Agricult	3
164	Senior	Woman	Rural	NO	Low	3.Agricult	3
178	Senior	Woman	Urban	NO	Low	3.Agricult	3
224	MiddleAged	Woman	Urban	NO	Low	3.Agricult	3
312	Senior	Woman	Urban	NO	Low	3.Agricult	3
52	Senior	Woman	Rural	NO	Low	3.Agricult	2
61	Senior	Man	Urban	NO	Low	3.Agricult	2
62	Senior	Man	Rural	NO	Low	3.Agricult	2
81	MiddleAged	Man	Urban	NO	Low	3.Agricult	2
91	Senior	Man	Urban	NO	Low	3.Agricult	2
94	MiddleAged	Man	Urban	NO	Low	3.Agricult	2
99	Senior	Man	Urban	NO	Low	3.Agricult	2
112	Senior	Man	Urban	NO	Low	3.Agricult	2
120	Senior	Man	Rural	NO	Low	3.Agricult	2
131	Senior	Woman	Rural	NO	Low	3.Agricult	2
153	Senior	Woman	Rural	NO	Low	3.Agricult	2
165	Senior	Man	Rural	NO	Low	3.Agricult	2
166	Senior	Woman	Urban	NO	Low	3.Agricult	2
171	Senior	Man	Urban	NO	Low	3.Agricult	2
173	Senior	Man	Rural	NO	Low	3.Agricult	2
253	Senior	Man	Urban	NO	Low	3.Agricult	2
260	Senior	Woman	Rural	NO	Low	3.Agricult	2
319	Senior	Man	Rural	NO	Low	3.Agricult	2
334	Senior	Man	Rural	NO	Low	3.Agricult	2
5	Senior	Woman	Rural	NO	Low	3.Agricult	1
8	Senior	Man	Urban	NO	Low	3.Agricult	1
51	Senior	Man	Rural	NO	Low	3.Agricult	1
59	Senior	Woman	Urban	NO	Low	3.Agricult	1
71	Senior	Man	Urban	NO	Low	3.Agricult	1
87	Senior	Man	Rural	NO	Low	3.Agricult	1
122	Senior	Man	Urban	NO	Low	3.Agricult	1
158	Senior	Man	Urban	NO	Low	3.Agricult	1
176	Senior	Woman	Urban	NO	Low	3.Agricult	1
183	Senior	Woman	Urban	NO	Low	3.Agricult	1
193	MiddleAged	Man	Urban	NO	Low	3.Agricult	1
194	Senior	Woman	Urban	NO	Low	3.Agricult	1
207	Senior	Woman	Urban	NO	Low	3.Agricult	1
219	Senior	Man	Rural	NO	Low	3.Agricult	1
241	Senior	Woman	Rural	NO	Low	3.Agricult	1
242	Senior	Woman	Rural	NO	Low	3.Agricult	1
263	MiddleAged	Woman	Urban	NO	Low	3.Agricult	1
265	MiddleAged	Woman	Urban	NO	Low	3.Agricult	1
266	Senior	Woman	Urban	NO	Low	3.Agricult	1
271	Senior	Woman	Urban	NO	Low	3.Agricult	1
287	MiddleAged	Man	Urban	NO	Low	3.Agricult	1
292	MiddleAged	Woman	Urban	NO	Low	3.Agricult	1
294	MiddleAged	Man	Urban	NO	Low	3.Agricult	1
304	Senior	Woman	Urban	NO	Low	3.Agricult	1
326	Senior	Woman	Urban	NO	Low	3.Agricult	1
22	Senior	Man	Urban	NO	Low	3.Agricult	2
93	Senior	Woman	Rural	YES	Low	3.Agricult	3
180	Senior	Woman	Rural	YES	Low	3.Agricult	3
2	Senior	Woman	Rural	YES	Low	3.Agricult	2
12	Senior	Man	Rural	YES	Low	3.Agricult	2
13	Senior	Woman	Rural	YES	Low	3.Agricult	2
58	MiddleAged	Woman	Urban	YES	Low	3.Agricult	2
69	MiddleAged	Woman	Rural	YES	Low	3.Agricult	2
77	Senior	Man	Rural	YES	Low	3.Agricult	2
80	Senior	Woman	Rural	YES	Low	3.Agricult	2
109	Senior	Woman	Rural	YES	Low	3.Agricult	2
133	Senior	Man	Rural	YES	Low	3.Agricult	2
154	Senior	Man	Rural	YES	Low	3.Agricult	2
213	Senior	Woman	Rural	YES	Low	3.Agricult	2
240	Senior	Woman	Rural	YES	Low	3.Agricult	2
256	Senior	Woman	Urban	YES	Low	3.Agricult	2
262	Senior	Man	Rural	YES	Low	3.Agricult	2
293	Senior	Woman	Rural	YES	Low	3.Agricult	2
323	Senior	Woman	Rural	YES	Low	3.Agricult	2
327	Senior	Woman	Rural	YES	Low	3.Agricult	2
329	Senior	Man	Rural	YES	Low	3.Agricult	2
339	Senior	Woman	Rural	YES	Low	3.Agricult	2
34	Senior	Man	Rural	YES	Low	3.Agricult	1
44	Senior	Woman	Rural	YES	Low	3.Agricult	1
45	MiddleAged	Woman	Urban	YES	Low	3.Agricult	1
67	MiddleAged	Man	Urban	YES	Low	3.Agricult	1
148	Senior	Man	Rural	YES	Low	3.Agricult	1
174	Senior	Man	Rural	YES	Low	3.Agricult	1
200	Senior	Man	Rural	YES	Low	3.Agricult	1
215	Senior	Woman	Rural	YES	Low	3.Agricult	1
228	MiddleAged	Woman	Urban	YES	Low	3.Agricult	1
229	Senior	Man	Urban	YES	Low	3.Agricult	1
233	Senior	Woman	Rural	YES	Low	3.Agricult	1
258	Senior	Man	Rural	YES	Low	3.Agricult	1
275	Senior	Woman	Rural	YES	Low	3.Agricult	1
276	Senior	Man	Rural	YES	Low	3.Agricult	1
281	Senior	Man	Rural	YES	Low	3.Agricult	1
286	Senior	Man	Rural	YES	Low	3.Agricult	1
289	Senior	Woman	Rural	YES	Low	3.Agricult	1
307	MiddleAged	Man	Rural	YES	Low	3.Agricult	1
263	MiddleAged	Woman	Urban	NO	Low	3.OakForest	4
312	Senior	Woman	Urban	NO	Low	3.OakForest	4
8	Senior	Man	Urban	NO	Low	3.OakForest	3
26	MiddleAged	Woman	Urban	NO	Low	3.OakForest	3
30	Senior	Woman	Urban	NO	Low	3.OakForest	3
33	Senior	Man	Rural	NO	Low	3.OakForest	3
51	Senior	Man	Rural	NO	Low	3.OakForest	3
52	Senior	Woman	Rural	NO	Low	3.OakForest	3
61	Senior	Man	Urban	NO	Low	3.OakForest	3
62	Senior	Man	Rural	NO	Low	3.OakForest	3
71	Senior	Man	Urban	NO	Low	3.OakForest	3
81	MiddleAged	Man	Urban	NO	Low	3.OakForest	3
87	Senior	Man	Rural	NO	Low	3.OakForest	3
91	Senior	Man	Urban	NO	Low	3.OakForest	3
94	MiddleAged	Man	Urban	NO	Low	3.OakForest	3
112	Senior	Man	Urban	NO	Low	3.OakForest	3
120	Senior	Man	Rural	NO	Low	3.OakForest	3
131	Senior	Woman	Rural	NO	Low	3.OakForest	3
153	Senior	Woman	Rural	NO	Low	3.OakForest	3
158	Senior	Man	Urban	NO	Low	3.OakForest	3
164	Senior	Woman	Rural	NO	Low	3.OakForest	3
165	Senior	Man	Rural	NO	Low	3.OakForest	3
166	Senior	Woman	Urban	NO	Low	3.OakForest	3
173	Senior	Man	Rural	NO	Low	3.OakForest	3
178	Senior	Woman	Urban	NO	Low	3.OakForest	3
194	Senior	Woman	Urban	NO	Low	3.OakForest	3
219	Senior	Man	Rural	NO	Low	3.OakForest	3
224	MiddleAged	Woman	Urban	NO	Low	3.OakForest	3
241	Senior	Woman	Rural	NO	Low	3.OakForest	3
253	Senior	Man	Urban	NO	Low	3.OakForest	3
260	Senior	Woman	Rural	NO	Low	3.OakForest	3
266	Senior	Woman	Urban	NO	Low	3.OakForest	3
294	MiddleAged	Man	Urban	NO	Low	3.OakForest	3
303	Senior	Woman	Urban	NO	Low	3.OakForest	3
304	Senior	Woman	Urban	NO	Low	3.OakForest	3
5	Senior	Woman	Rural	NO	Low	3.OakForest	2
7	Senior	Woman	Rural	NO	Low	3.OakForest	2
50	Senior	Woman	Rural	NO	Low	3.OakForest	2
59	Senior	Woman	Urban	NO	Low	3.OakForest	2
99	Senior	Man	Urban	NO	Low	3.OakForest	2
122	Senior	Man	Urban	NO	Low	3.OakForest	2
171	Senior	Man	Urban	NO	Low	3.OakForest	2
176	Senior	Woman	Urban	NO	Low	3.OakForest	2
183	Senior	Woman	Urban	NO	Low	3.OakForest	2
193	MiddleAged	Man	Urban	NO	Low	3.OakForest	2
207	Senior	Woman	Urban	NO	Low	3.OakForest	2
242	Senior	Woman	Rural	NO	Low	3.OakForest	2
265	MiddleAged	Woman	Urban	NO	Low	3.OakForest	2
271	Senior	Woman	Urban	NO	Low	3.OakForest	2
287	MiddleAged	Man	Urban	NO	Low	3.OakForest	2
292	MiddleAged	Woman	Urban	NO	Low	3.OakForest	2
319	Senior	Man	Rural	NO	Low	3.OakForest	2
326	Senior	Woman	Urban	NO	Low	3.OakForest	2
334	Senior	Man	Rural	NO	Low	3.OakForest	2
22	Senior	Man	Urban	NO	Low	3.OakForest	3
80	Senior	Woman	Rural	YES	Low	3.OakForest	4
45	MiddleAged	Woman	Urban	YES	Low	3.OakForest	3
67	MiddleAged	Man	Urban	YES	Low	3.OakForest	3
69	MiddleAged	Woman	Rural	YES	Low	3.OakForest	3
77	Senior	Man	Rural	YES	Low	3.OakForest	3
93	Senior	Woman	Rural	YES	Low	3.OakForest	3
109	Senior	Woman	Rural	YES	Low	3.OakForest	3
133	Senior	Man	Rural	YES	Low	3.OakForest	3
174	Senior	Man	Rural	YES	Low	3.OakForest	3
200	Senior	Man	Rural	YES	Low	3.OakForest	3
229	Senior	Man	Urban	YES	Low	3.OakForest	3
233	Senior	Woman	Rural	YES	Low	3.OakForest	3
240	Senior	Woman	Rural	YES	Low	3.OakForest	3
262	Senior	Man	Rural	YES	Low	3.OakForest	3
286	Senior	Man	Rural	YES	Low	3.OakForest	3
289	Senior	Woman	Rural	YES	Low	3.OakForest	3
307	MiddleAged	Man	Rural	YES	Low	3.OakForest	3
2	Senior	Woman	Rural	YES	Low	3.OakForest	2
12	Senior	Man	Rural	YES	Low	3.OakForest	2
13	Senior	Woman	Rural	YES	Low	3.OakForest	2
44	Senior	Woman	Rural	YES	Low	3.OakForest	2
58	MiddleAged	Woman	Urban	YES	Low	3.OakForest	2
154	Senior	Man	Rural	YES	Low	3.OakForest	2
180	Senior	Woman	Rural	YES	Low	3.OakForest	2
213	Senior	Woman	Rural	YES	Low	3.OakForest	2
215	Senior	Woman	Rural	YES	Low	3.OakForest	2
228	MiddleAged	Woman	Urban	YES	Low	3.OakForest	2
258	Senior	Man	Rural	YES	Low	3.OakForest	2
275	Senior	Woman	Rural	YES	Low	3.OakForest	2
276	Senior	Man	Rural	YES	Low	3.OakForest	2
281	Senior	Man	Rural	YES	Low	3.OakForest	2
293	Senior	Woman	Rural	YES	Low	3.OakForest	2
323	Senior	Woman	Rural	YES	Low	3.OakForest	2
327	Senior	Woman	Rural	YES	Low	3.OakForest	2
329	Senior	Man	Rural	YES	Low	3.OakForest	2
339	Senior	Woman	Rural	YES	Low	3.OakForest	2
34	Senior	Man	Rural	YES	Low	3.OakForest	1
148	Senior	Man	Rural	YES	Low	3.OakForest	1
256	Senior	Woman	Urban	YES	Low	3.OakForest	1
5	Senior	Woman	Rural	NO	Low	3.Eucalypt Pl.	4
7	Senior	Woman	Rural	NO	Low	3.Eucalypt Pl.	4
30	Senior	Woman	Urban	NO	Low	3.Eucalypt Pl.	4
52	Senior	Woman	Rural	NO	Low	3.Eucalypt Pl.	4
120	Senior	Man	Rural	NO	Low	3.Eucalypt Pl.	4
131	Senior	Woman	Rural	NO	Low	3.Eucalypt Pl.	4
164	Senior	Woman	Rural	NO	Low	3.Eucalypt Pl.	4
165	Senior	Man	Rural	NO	Low	3.Eucalypt Pl.	4
166	Senior	Woman	Urban	NO	Low	3.Eucalypt Pl.	4
173	Senior	Man	Rural	NO	Low	3.Eucalypt Pl.	4
207	Senior	Woman	Urban	NO	Low	3.Eucalypt Pl.	4
253	Senior	Man	Urban	NO	Low	3.Eucalypt Pl.	4
292	MiddleAged	Woman	Urban	NO	Low	3.Eucalypt Pl.	4
312	Senior	Woman	Urban	NO	Low	3.Eucalypt Pl.	4
319	Senior	Man	Rural	NO	Low	3.Eucalypt Pl.	4
334	Senior	Man	Rural	NO	Low	3.Eucalypt Pl.	4
8	Senior	Man	Urban	NO	Low	3.Eucalypt Pl.	3
26	MiddleAged	Woman	Urban	NO	Low	3.Eucalypt Pl.	3
33	Senior	Man	Rural	NO	Low	3.Eucalypt Pl.	3
50	Senior	Woman	Rural	NO	Low	3.Eucalypt Pl.	3
51	Senior	Man	Rural	NO	Low	3.Eucalypt Pl.	3
59	Senior	Woman	Urban	NO	Low	3.Eucalypt Pl.	3
61	Senior	Man	Urban	NO	Low	3.Eucalypt Pl.	3
62	Senior	Man	Rural	NO	Low	3.Eucalypt Pl.	3
71	Senior	Man	Urban	NO	Low	3.Eucalypt Pl.	3
81	MiddleAged	Man	Urban	NO	Low	3.Eucalypt Pl.	3
87	Senior	Man	Rural	NO	Low	3.Eucalypt Pl.	3
91	Senior	Man	Urban	NO	Low	3.Eucalypt Pl.	3
94	MiddleAged	Man	Urban	NO	Low	3.Eucalypt Pl.	3
99	Senior	Man	Urban	NO	Low	3.Eucalypt Pl.	3
112	Senior	Man	Urban	NO	Low	3.Eucalypt Pl.	3
122	Senior	Man	Urban	NO	Low	3.Eucalypt Pl.	3
153	Senior	Woman	Rural	NO	Low	3.Eucalypt Pl.	3
158	Senior	Man	Urban	NO	Low	3.Eucalypt Pl.	3
171	Senior	Man	Urban	NO	Low	3.Eucalypt Pl.	3
176	Senior	Woman	Urban	NO	Low	3.Eucalypt Pl.	3
183	Senior	Woman	Urban	NO	Low	3.Eucalypt Pl.	3
193	MiddleAged	Man	Urban	NO	Low	3.Eucalypt Pl.	3
194	Senior	Woman	Urban	NO	Low	3.Eucalypt Pl.	3
219	Senior	Man	Rural	NO	Low	3.Eucalypt Pl.	3
224	MiddleAged	Woman	Urban	NO	Low	3.Eucalypt Pl.	3
241	Senior	Woman	Rural	NO	Low	3.Eucalypt Pl.	3
242	Senior	Woman	Rural	NO	Low	3.Eucalypt Pl.	3
260	Senior	Woman	Rural	NO	Low	3.Eucalypt Pl.	3
263	MiddleAged	Woman	Urban	NO	Low	3.Eucalypt Pl.	3
265	MiddleAged	Woman	Urban	NO	Low	3.Eucalypt Pl.	3
266	Senior	Woman	Urban	NO	Low	3.Eucalypt Pl.	3
271	Senior	Woman	Urban	NO	Low	3.Eucalypt Pl.	3
294	MiddleAged	Man	Urban	NO	Low	3.Eucalypt Pl.	3
304	Senior	Woman	Urban	NO	Low	3.Eucalypt Pl.	3
326	Senior	Woman	Urban	NO	Low	3.Eucalypt Pl.	3
178	Senior	Woman	Urban	NO	Low	3.Eucalypt Pl.	2
303	Senior	Woman	Urban	NO	Low	3.Eucalypt Pl.	2
287	MiddleAged	Man	Urban	NO	Low	3.Eucalypt Pl.	1
22	Senior	Man	Urban	NO	Low	3.Eucalypt Pl.	3
12	Senior	Man	Rural	YES	Low	3.Eucalypt Pl.	4
13	Senior	Woman	Rural	YES	Low	3.Eucalypt Pl.	4
58	MiddleAged	Woman	Urban	YES	Low	3.Eucalypt Pl.	4
69	MiddleAged	Woman	Rural	YES	Low	3.Eucalypt Pl.	4
77	Senior	Man	Rural	YES	Low	3.Eucalypt Pl.	4
80	Senior	Woman	Rural	YES	Low	3.Eucalypt Pl.	4
109	Senior	Woman	Rural	YES	Low	3.Eucalypt Pl.	4
233	Senior	Woman	Rural	YES	Low	3.Eucalypt Pl.	4
276	Senior	Man	Rural	YES	Low	3.Eucalypt Pl.	4
289	Senior	Woman	Rural	YES	Low	3.Eucalypt Pl.	4
323	Senior	Woman	Rural	YES	Low	3.Eucalypt Pl.	4
329	Senior	Man	Rural	YES	Low	3.Eucalypt Pl.	4
2	Senior	Woman	Rural	YES	Low	3.Eucalypt Pl.	3
34	Senior	Man	Rural	YES	Low	3.Eucalypt Pl.	3
44	Senior	Woman	Rural	YES	Low	3.Eucalypt Pl.	3
45	MiddleAged	Woman	Urban	YES	Low	3.Eucalypt Pl.	3
67	MiddleAged	Man	Urban	YES	Low	3.Eucalypt Pl.	3
93	Senior	Woman	Rural	YES	Low	3.Eucalypt Pl.	3
133	Senior	Man	Rural	YES	Low	3.Eucalypt Pl.	3
148	Senior	Man	Rural	YES	Low	3.Eucalypt Pl.	3
154	Senior	Man	Rural	YES	Low	3.Eucalypt Pl.	3
174	Senior	Man	Rural	YES	Low	3.Eucalypt Pl.	3
200	Senior	Man	Rural	YES	Low	3.Eucalypt Pl.	3
213	Senior	Woman	Rural	YES	Low	3.Eucalypt Pl.	3
215	Senior	Woman	Rural	YES	Low	3.Eucalypt Pl.	3
228	MiddleAged	Woman	Urban	YES	Low	3.Eucalypt Pl.	3
229	Senior	Man	Urban	YES	Low	3.Eucalypt Pl.	3
240	Senior	Woman	Rural	YES	Low	3.Eucalypt Pl.	3
256	Senior	Woman	Urban	YES	Low	3.Eucalypt Pl.	3
258	Senior	Man	Rural	YES	Low	3.Eucalypt Pl.	3
262	Senior	Man	Rural	YES	Low	3.Eucalypt Pl.	3
275	Senior	Woman	Rural	YES	Low	3.Eucalypt Pl.	3
286	Senior	Man	Rural	YES	Low	3.Eucalypt Pl.	3
293	Senior	Woman	Rural	YES	Low	3.Eucalypt Pl.	3
327	Senior	Woman	Rural	YES	Low	3.Eucalypt Pl.	3
339	Senior	Woman	Rural	YES	Low	3.Eucalypt Pl.	3
180	Senior	Woman	Rural	YES	Low	3.Eucalypt Pl.	2
281	Senior	Man	Rural	YES	Low	3.Eucalypt Pl.	2
307	MiddleAged	Man	Rural	YES	Low	3.Eucalypt Pl.	2
91	Senior	Man	Urban	NO	Low	3.Mixed forest	4
165	Senior	Man	Rural	NO	Low	3.Mixed forest	4
166	Senior	Woman	Urban	NO	Low	3.Mixed forest	4
207	Senior	Woman	Urban	NO	Low	3.Mixed forest	4
253	Senior	Man	Urban	NO	Low	3.Mixed forest	4
260	Senior	Woman	Rural	NO	Low	3.Mixed forest	4
263	MiddleAged	Woman	Urban	NO	Low	3.Mixed forest	4
292	MiddleAged	Woman	Urban	NO	Low	3.Mixed forest	4
312	Senior	Woman	Urban	NO	Low	3.Mixed forest	4
334	Senior	Man	Rural	NO	Low	3.Mixed forest	4
5	Senior	Woman	Rural	NO	Low	3.Mixed forest	3
7	Senior	Woman	Rural	NO	Low	3.Mixed forest	3
8	Senior	Man	Urban	NO	Low	3.Mixed forest	3
26	MiddleAged	Woman	Urban	NO	Low	3.Mixed forest	3
30	Senior	Woman	Urban	NO	Low	3.Mixed forest	3
33	Senior	Man	Rural	NO	Low	3.Mixed forest	3
50	Senior	Woman	Rural	NO	Low	3.Mixed forest	3
51	Senior	Man	Rural	NO	Low	3.Mixed forest	3
52	Senior	Woman	Rural	NO	Low	3.Mixed forest	3
59	Senior	Woman	Urban	NO	Low	3.Mixed forest	3
61	Senior	Man	Urban	NO	Low	3.Mixed forest	3
62	Senior	Man	Rural	NO	Low	3.Mixed forest	3
71	Senior	Man	Urban	NO	Low	3.Mixed forest	3
81	MiddleAged	Man	Urban	NO	Low	3.Mixed forest	3
87	Senior	Man	Rural	NO	Low	3.Mixed forest	3
94	MiddleAged	Man	Urban	NO	Low	3.Mixed forest	3
99	Senior	Man	Urban	NO	Low	3.Mixed forest	3
112	Senior	Man	Urban	NO	Low	3.Mixed forest	3
120	Senior	Man	Rural	NO	Low	3.Mixed forest	3
122	Senior	Man	Urban	NO	Low	3.Mixed forest	3
131	Senior	Woman	Rural	NO	Low	3.Mixed forest	3
153	Senior	Woman	Rural	NO	Low	3.Mixed forest	3
158	Senior	Man	Urban	NO	Low	3.Mixed forest	3
164	Senior	Woman	Rural	NO	Low	3.Mixed forest	3
173	Senior	Man	Rural	NO	Low	3.Mixed forest	3
176	Senior	Woman	Urban	NO	Low	3.Mixed forest	3
178	Senior	Woman	Urban	NO	Low	3.Mixed forest	3
183	Senior	Woman	Urban	NO	Low	3.Mixed forest	3
193	MiddleAged	Man	Urban	NO	Low	3.Mixed forest	3
224	MiddleAged	Woman	Urban	NO	Low	3.Mixed forest	3
241	Senior	Woman	Rural	NO	Low	3.Mixed forest	3
242	Senior	Woman	Rural	NO	Low	3.Mixed forest	3
265	MiddleAged	Woman	Urban	NO	Low	3.Mixed forest	3
266	Senior	Woman	Urban	NO	Low	3.Mixed forest	3
271	Senior	Woman	Urban	NO	Low	3.Mixed forest	3
303	Senior	Woman	Urban	NO	Low	3.Mixed forest	3
304	Senior	Woman	Urban	NO	Low	3.Mixed forest	3
319	Senior	Man	Rural	NO	Low	3.Mixed forest	3
326	Senior	Woman	Urban	NO	Low	3.Mixed forest	3
171	Senior	Man	Urban	NO	Low	3.Mixed forest	2
194	Senior	Woman	Urban	NO	Low	3.Mixed forest	2
219	Senior	Man	Rural	NO	Low	3.Mixed forest	2
287	MiddleAged	Man	Urban	NO	Low	3.Mixed forest	2
294	MiddleAged	Man	Urban	NO	Low	3.Mixed forest	2
22	Senior	Man	Urban	NO	Low	3.Mixed forest	3
12	Senior	Man	Rural	YES	Low	3.Mixed forest	4
45	MiddleAged	Woman	Urban	YES	Low	3.Mixed forest	4
77	Senior	Man	Rural	YES	Low	3.Mixed forest	4
80	Senior	Woman	Rural	YES	Low	3.Mixed forest	4
258	Senior	Man	Rural	YES	Low	3.Mixed forest	4
329	Senior	Man	Rural	YES	Low	3.Mixed forest	4
2	Senior	Woman	Rural	YES	Low	3.Mixed forest	3
13	Senior	Woman	Rural	YES	Low	3.Mixed forest	3
44	Senior	Woman	Rural	YES	Low	3.Mixed forest	3
58	MiddleAged	Woman	Urban	YES	Low	3.Mixed forest	3
67	MiddleAged	Man	Urban	YES	Low	3.Mixed forest	3
69	MiddleAged	Woman	Rural	YES	Low	3.Mixed forest	3
93	Senior	Woman	Rural	YES	Low	3.Mixed forest	3
109	Senior	Woman	Rural	YES	Low	3.Mixed forest	3
133	Senior	Man	Rural	YES	Low	3.Mixed forest	3
148	Senior	Man	Rural	YES	Low	3.Mixed forest	3
154	Senior	Man	Rural	YES	Low	3.Mixed forest	3
174	Senior	Man	Rural	YES	Low	3.Mixed forest	3
180	Senior	Woman	Rural	YES	Low	3.Mixed forest	3
200	Senior	Man	Rural	YES	Low	3.Mixed forest	3
213	Senior	Woman	Rural	YES	Low	3.Mixed forest	3
215	Senior	Woman	Rural	YES	Low	3.Mixed forest	3
228	MiddleAged	Woman	Urban	YES	Low	3.Mixed forest	3
233	Senior	Woman	Rural	YES	Low	3.Mixed forest	3
240	Senior	Woman	Rural	YES	Low	3.Mixed forest	3
256	Senior	Woman	Urban	YES	Low	3.Mixed forest	3
262	Senior	Man	Rural	YES	Low	3.Mixed forest	3
275	Senior	Woman	Rural	YES	Low	3.Mixed forest	3
276	Senior	Man	Rural	YES	Low	3.Mixed forest	3
286	Senior	Man	Rural	YES	Low	3.Mixed forest	3
293	Senior	Woman	Rural	YES	Low	3.Mixed forest	3
307	MiddleAged	Man	Rural	YES	Low	3.Mixed forest	3
323	Senior	Woman	Rural	YES	Low	3.Mixed forest	3
327	Senior	Woman	Rural	YES	Low	3.Mixed forest	3
339	Senior	Woman	Rural	YES	Low	3.Mixed forest	3
34	Senior	Man	Rural	YES	Low	3.Mixed forest	2
229	Senior	Man	Urban	YES	Low	3.Mixed forest	2
281	Senior	Man	Rural	YES	Low	3.Mixed forest	2
289	Senior	Woman	Rural	YES	Low	3.Mixed forest	2
5	Senior	Woman	Rural	NO	Low	3.Shrubland	4
8	Senior	Man	Urban	NO	Low	3.Shrubland	4
52	Senior	Woman	Rural	NO	Low	3.Shrubland	4
94	MiddleAged	Man	Urban	NO	Low	3.Shrubland	4
120	Senior	Man	Rural	NO	Low	3.Shrubland	4
131	Senior	Woman	Rural	NO	Low	3.Shrubland	4
165	Senior	Man	Rural	NO	Low	3.Shrubland	4
207	Senior	Woman	Urban	NO	Low	3.Shrubland	4
242	Senior	Woman	Rural	NO	Low	3.Shrubland	4
253	Senior	Man	Urban	NO	Low	3.Shrubland	4
294	MiddleAged	Man	Urban	NO	Low	3.Shrubland	4
319	Senior	Man	Rural	NO	Low	3.Shrubland	4
7	Senior	Woman	Rural	NO	Low	3.Shrubland	3
26	MiddleAged	Woman	Urban	NO	Low	3.Shrubland	3
30	Senior	Woman	Urban	NO	Low	3.Shrubland	3
50	Senior	Woman	Rural	NO	Low	3.Shrubland	3
59	Senior	Woman	Urban	NO	Low	3.Shrubland	3
61	Senior	Man	Urban	NO	Low	3.Shrubland	3
71	Senior	Man	Urban	NO	Low	3.Shrubland	3
122	Senior	Man	Urban	NO	Low	3.Shrubland	3
158	Senior	Man	Urban	NO	Low	3.Shrubland	3
166	Senior	Woman	Urban	NO	Low	3.Shrubland	3
171	Senior	Man	Urban	NO	Low	3.Shrubland	3
173	Senior	Man	Rural	NO	Low	3.Shrubland	3
176	Senior	Woman	Urban	NO	Low	3.Shrubland	3
178	Senior	Woman	Urban	NO	Low	3.Shrubland	3
183	Senior	Woman	Urban	NO	Low	3.Shrubland	3
224	MiddleAged	Woman	Urban	NO	Low	3.Shrubland	3
263	MiddleAged	Woman	Urban	NO	Low	3.Shrubland	3
271	Senior	Woman	Urban	NO	Low	3.Shrubland	3
287	MiddleAged	Man	Urban	NO	Low	3.Shrubland	3
292	MiddleAged	Woman	Urban	NO	Low	3.Shrubland	3
303	Senior	Woman	Urban	NO	Low	3.Shrubland	3
312	Senior	Woman	Urban	NO	Low	3.Shrubland	3
326	Senior	Woman	Urban	NO	Low	3.Shrubland	3
334	Senior	Man	Rural	NO	Low	3.Shrubland	3
33	Senior	Man	Rural	NO	Low	3.Shrubland	2
51	Senior	Man	Rural	NO	Low	3.Shrubland	2
62	Senior	Man	Rural	NO	Low	3.Shrubland	2
81	MiddleAged	Man	Urban	NO	Low	3.Shrubland	2
87	Senior	Man	Rural	NO	Low	3.Shrubland	2
91	Senior	Man	Urban	NO	Low	3.Shrubland	2
99	Senior	Man	Urban	NO	Low	3.Shrubland	2
112	Senior	Man	Urban	NO	Low	3.Shrubland	2
153	Senior	Woman	Rural	NO	Low	3.Shrubland	2
164	Senior	Woman	Rural	NO	Low	3.Shrubland	2
193	MiddleAged	Man	Urban	NO	Low	3.Shrubland	2
194	Senior	Woman	Urban	NO	Low	3.Shrubland	2
219	Senior	Man	Rural	NO	Low	3.Shrubland	2
241	Senior	Woman	Rural	NO	Low	3.Shrubland	2
260	Senior	Woman	Rural	NO	Low	3.Shrubland	2
265	MiddleAged	Woman	Urban	NO	Low	3.Shrubland	2
266	Senior	Woman	Urban	NO	Low	3.Shrubland	2
304	Senior	Woman	Urban	NO	Low	3.Shrubland	2
22	Senior	Man	Urban	NO	Low	3.Shrubland	3
2	Senior	Woman	Rural	YES	Low	3.Shrubland	4
13	Senior	Woman	Rural	YES	Low	3.Shrubland	4
44	Senior	Woman	Rural	YES	Low	3.Shrubland	4
80	Senior	Woman	Rural	YES	Low	3.Shrubland	4
109	Senior	Woman	Rural	YES	Low	3.Shrubland	4
233	Senior	Woman	Rural	YES	Low	3.Shrubland	4
256	Senior	Woman	Urban	YES	Low	3.Shrubland	4
276	Senior	Man	Rural	YES	Low	3.Shrubland	4
281	Senior	Man	Rural	YES	Low	3.Shrubland	4
307	MiddleAged	Man	Rural	YES	Low	3.Shrubland	4
323	Senior	Woman	Rural	YES	Low	3.Shrubland	4
45	MiddleAged	Woman	Urban	YES	Low	3.Shrubland	3
69	MiddleAged	Woman	Rural	YES	Low	3.Shrubland	3
77	Senior	Man	Rural	YES	Low	3.Shrubland	3
154	Senior	Man	Rural	YES	Low	3.Shrubland	3
180	Senior	Woman	Rural	YES	Low	3.Shrubland	3
215	Senior	Woman	Rural	YES	Low	3.Shrubland	3
258	Senior	Man	Rural	YES	Low	3.Shrubland	3
275	Senior	Woman	Rural	YES	Low	3.Shrubland	3
289	Senior	Woman	Rural	YES	Low	3.Shrubland	3
293	Senior	Woman	Rural	YES	Low	3.Shrubland	3
327	Senior	Woman	Rural	YES	Low	3.Shrubland	3
339	Senior	Woman	Rural	YES	Low	3.Shrubland	3
34	Senior	Man	Rural	YES	Low	3.Shrubland	2
58	MiddleAged	Woman	Urban	YES	Low	3.Shrubland	2
67	MiddleAged	Man	Urban	YES	Low	3.Shrubland	2
93	Senior	Woman	Rural	YES	Low	3.Shrubland	2
133	Senior	Man	Rural	YES	Low	3.Shrubland	2
148	Senior	Man	Rural	YES	Low	3.Shrubland	2
174	Senior	Man	Rural	YES	Low	3.Shrubland	2
200	Senior	Man	Rural	YES	Low	3.Shrubland	2
228	MiddleAged	Woman	Urban	YES	Low	3.Shrubland	2
229	Senior	Man	Urban	YES	Low	3.Shrubland	2
240	Senior	Woman	Rural	YES	Low	3.Shrubland	2
262	Senior	Man	Rural	YES	Low	3.Shrubland	2
286	Senior	Man	Rural	YES	Low	3.Shrubland	2
12	Senior	Man	Rural	YES	Low	3.Shrubland	1
213	Senior	Woman	Rural	YES	Low	3.Shrubland	1
329	Senior	Man	Rural	YES	Low	3.Shrubland	1
5	Senior	Woman	Rural	NO	Low	3.Pine Pl.	4
7	Senior	Woman	Rural	NO	Low	3.Pine Pl.	4
8	Senior	Man	Urban	NO	Low	3.Pine Pl.	4
50	Senior	Woman	Rural	NO	Low	3.Pine Pl.	4
51	Senior	Man	Rural	NO	Low	3.Pine Pl.	4
52	Senior	Woman	Rural	NO	Low	3.Pine Pl.	4
71	Senior	Man	Urban	NO	Low	3.Pine Pl.	4
87	Senior	Man	Rural	NO	Low	3.Pine Pl.	4
120	Senior	Man	Rural	NO	Low	3.Pine Pl.	4
158	Senior	Man	Urban	NO	Low	3.Pine Pl.	4
165	Senior	Man	Rural	NO	Low	3.Pine Pl.	4
166	Senior	Woman	Urban	NO	Low	3.Pine Pl.	4
171	Senior	Man	Urban	NO	Low	3.Pine Pl.	4
173	Senior	Man	Rural	NO	Low	3.Pine Pl.	4
183	Senior	Woman	Urban	NO	Low	3.Pine Pl.	4
207	Senior	Woman	Urban	NO	Low	3.Pine Pl.	4
219	Senior	Man	Rural	NO	Low	3.Pine Pl.	4
260	Senior	Woman	Rural	NO	Low	3.Pine Pl.	4
263	MiddleAged	Woman	Urban	NO	Low	3.Pine Pl.	4
292	MiddleAged	Woman	Urban	NO	Low	3.Pine Pl.	4
312	Senior	Woman	Urban	NO	Low	3.Pine Pl.	4
326	Senior	Woman	Urban	NO	Low	3.Pine Pl.	4
334	Senior	Man	Rural	NO	Low	3.Pine Pl.	4
26	MiddleAged	Woman	Urban	NO	Low	3.Pine Pl.	3
30	Senior	Woman	Urban	NO	Low	3.Pine Pl.	3
33	Senior	Man	Rural	NO	Low	3.Pine Pl.	3
59	Senior	Woman	Urban	NO	Low	3.Pine Pl.	3
61	Senior	Man	Urban	NO	Low	3.Pine Pl.	3
62	Senior	Man	Rural	NO	Low	3.Pine Pl.	3
81	MiddleAged	Man	Urban	NO	Low	3.Pine Pl.	3
91	Senior	Man	Urban	NO	Low	3.Pine Pl.	3
94	MiddleAged	Man	Urban	NO	Low	3.Pine Pl.	3
99	Senior	Man	Urban	NO	Low	3.Pine Pl.	3
112	Senior	Man	Urban	NO	Low	3.Pine Pl.	3
131	Senior	Woman	Rural	NO	Low	3.Pine Pl.	3
153	Senior	Woman	Rural	NO	Low	3.Pine Pl.	3
164	Senior	Woman	Rural	NO	Low	3.Pine Pl.	3
193	MiddleAged	Man	Urban	NO	Low	3.Pine Pl.	3
194	Senior	Woman	Urban	NO	Low	3.Pine Pl.	3
224	MiddleAged	Woman	Urban	NO	Low	3.Pine Pl.	3
241	Senior	Woman	Rural	NO	Low	3.Pine Pl.	3
242	Senior	Woman	Rural	NO	Low	3.Pine Pl.	3
253	Senior	Man	Urban	NO	Low	3.Pine Pl.	3
265	MiddleAged	Woman	Urban	NO	Low	3.Pine Pl.	3
266	Senior	Woman	Urban	NO	Low	3.Pine Pl.	3
287	MiddleAged	Man	Urban	NO	Low	3.Pine Pl.	3
294	MiddleAged	Man	Urban	NO	Low	3.Pine Pl.	3
304	Senior	Woman	Urban	NO	Low	3.Pine Pl.	3
319	Senior	Man	Rural	NO	Low	3.Pine Pl.	3
122	Senior	Man	Urban	NO	Low	3.Pine Pl.	2
176	Senior	Woman	Urban	NO	Low	3.Pine Pl.	2
178	Senior	Woman	Urban	NO	Low	3.Pine Pl.	2
271	Senior	Woman	Urban	NO	Low	3.Pine Pl.	2
303	Senior	Woman	Urban	NO	Low	3.Pine Pl.	2
22	Senior	Man	Urban	NO	Low	3.Pine Pl.	3
13	Senior	Woman	Rural	YES	Low	3.Pine Pl.	4
44	Senior	Woman	Rural	YES	Low	3.Pine Pl.	4
45	MiddleAged	Woman	Urban	YES	Low	3.Pine Pl.	4
58	MiddleAged	Woman	Urban	YES	Low	3.Pine Pl.	4
67	MiddleAged	Man	Urban	YES	Low	3.Pine Pl.	4
69	MiddleAged	Woman	Rural	YES	Low	3.Pine Pl.	4
77	Senior	Man	Rural	YES	Low	3.Pine Pl.	4
80	Senior	Woman	Rural	YES	Low	3.Pine Pl.	4
109	Senior	Woman	Rural	YES	Low	3.Pine Pl.	4
133	Senior	Man	Rural	YES	Low	3.Pine Pl.	4
154	Senior	Man	Rural	YES	Low	3.Pine Pl.	4
174	Senior	Man	Rural	YES	Low	3.Pine Pl.	4
215	Senior	Woman	Rural	YES	Low	3.Pine Pl.	4
240	Senior	Woman	Rural	YES	Low	3.Pine Pl.	4
258	Senior	Man	Rural	YES	Low	3.Pine Pl.	4
307	MiddleAged	Man	Rural	YES	Low	3.Pine Pl.	4
323	Senior	Woman	Rural	YES	Low	3.Pine Pl.	4
2	Senior	Woman	Rural	YES	Low	3.Pine Pl.	3
12	Senior	Man	Rural	YES	Low	3.Pine Pl.	3
34	Senior	Man	Rural	YES	Low	3.Pine Pl.	3
93	Senior	Woman	Rural	YES	Low	3.Pine Pl.	3
148	Senior	Man	Rural	YES	Low	3.Pine Pl.	3
200	Senior	Man	Rural	YES	Low	3.Pine Pl.	3
213	Senior	Woman	Rural	YES	Low	3.Pine Pl.	3
228	MiddleAged	Woman	Urban	YES	Low	3.Pine Pl.	3
229	Senior	Man	Urban	YES	Low	3.Pine Pl.	3
233	Senior	Woman	Rural	YES	Low	3.Pine Pl.	3
256	Senior	Woman	Urban	YES	Low	3.Pine Pl.	3
262	Senior	Man	Rural	YES	Low	3.Pine Pl.	3
276	Senior	Man	Rural	YES	Low	3.Pine Pl.	3
281	Senior	Man	Rural	YES	Low	3.Pine Pl.	3
286	Senior	Man	Rural	YES	Low	3.Pine Pl.	3
289	Senior	Woman	Rural	YES	Low	3.Pine Pl.	3
293	Senior	Woman	Rural	YES	Low	3.Pine Pl.	3
329	Senior	Man	Rural	YES	Low	3.Pine Pl.	3
339	Senior	Woman	Rural	YES	Low	3.Pine Pl.	3
180	Senior	Woman	Rural	YES	Low	3.Pine Pl.	2
275	Senior	Woman	Rural	YES	Low	3.Pine Pl.	2
327	Senior	Woman	Rural	YES	Low	3.Pine Pl.	2
31	MiddleAged	Woman	Urban	NO	Medium	3.Agricult	3
43	MiddleAged	Man	Rural	NO	Medium	3.Agricult	3
65	MiddleAged	Woman	Urban	NO	Medium	3.Agricult	3
75	Young	Woman	Urban	NO	Medium	3.Agricult	3
117	MiddleAged	Man	Urban	NO	Medium	3.Agricult	3
151	MiddleAged	Woman	Urban	NO	Medium	3.Agricult	3
163	Senior	Woman	Urban	NO	Medium	3.Agricult	3
184	MiddleAged	Man	Urban	NO	Medium	3.Agricult	3
239	MiddleAged	Man	Urban	NO	Medium	3.Agricult	3
244	Young	Man	Urban	NO	Medium	3.Agricult	3
251	MiddleAged	Woman	Urban	NO	Medium	3.Agricult	3
254	MiddleAged	Woman	Urban	NO	Medium	3.Agricult	3
270	Young	Woman	Urban	NO	Medium	3.Agricult	3
321	Senior	Man	Urban	NO	Medium	3.Agricult	3
330	MiddleAged	Woman	Urban	NO	Medium	3.Agricult	3
1	MiddleAged	Woman	Urban	NO	Medium	3.Agricult	2
17	Senior	Woman	Rural	NO	Medium	3.Agricult	2
25	MiddleAged	Man	Urban	NO	Medium	3.Agricult	2
49	Senior	Woman	Urban	NO	Medium	3.Agricult	2
60	Senior	Woman	Urban	NO	Medium	3.Agricult	2
68	MiddleAged	Woman	Urban	NO	Medium	3.Agricult	2
70	MiddleAged	Woman	Urban	NO	Medium	3.Agricult	2
76	MiddleAged	Woman	Urban	NO	Medium	3.Agricult	2
79	MiddleAged	Man	Urban	NO	Medium	3.Agricult	2
84	Senior	Man	Urban	NO	Medium	3.Agricult	2
89	Young	Woman	Rural	NO	Medium	3.Agricult	2
90	MiddleAged	Woman	Urban	NO	Medium	3.Agricult	2
95	Young	Woman	Urban	NO	Medium	3.Agricult	2
101	Senior	Man	Rural	NO	Medium	3.Agricult	2
106	MiddleAged	Man	Urban	NO	Medium	3.Agricult	2
113	Senior	Woman	Urban	NO	Medium	3.Agricult	2
114	Young	Woman	Urban	NO	Medium	3.Agricult	2
119	MiddleAged	Woman	Urban	NO	Medium	3.Agricult	2
139	Senior	Man	Urban	NO	Medium	3.Agricult	2
143	MiddleAged	Man	Urban	NO	Medium	3.Agricult	2
146	MiddleAged	Woman	Urban	NO	Medium	3.Agricult	2
160	MiddleAged	Man	Urban	NO	Medium	3.Agricult	2
162	MiddleAged	Woman	Urban	NO	Medium	3.Agricult	2
168	MiddleAged	Woman	Urban	NO	Medium	3.Agricult	2
169	MiddleAged	Woman	Urban	NO	Medium	3.Agricult	2
177	MiddleAged	Man	Urban	NO	Medium	3.Agricult	2
187	Senior	Woman	Urban	NO	Medium	3.Agricult	2
195	MiddleAged	Woman	Urban	NO	Medium	3.Agricult	2
206	MiddleAged	Woman	Urban	NO	Medium	3.Agricult	2
212	MiddleAged	Woman	Urban	NO	Medium	3.Agricult	2
214	MiddleAged	Man	Urban	NO	Medium	3.Agricult	2
236	MiddleAged	Man	Urban	NO	Medium	3.Agricult	2
246	Senior	Woman	Rural	NO	Medium	3.Agricult	2
250	MiddleAged	Man	Urban	NO	Medium	3.Agricult	2
257	MiddleAged	Woman	Urban	NO	Medium	3.Agricult	2
264	MiddleAged	Man	Urban	NO	Medium	3.Agricult	2
267	MiddleAged	Man	Urban	NO	Medium	3.Agricult	2
274	MiddleAged	Man	Urban	NO	Medium	3.Agricult	2
284	MiddleAged	Woman	Urban	NO	Medium	3.Agricult	2
313	MiddleAged	Man	Urban	NO	Medium	3.Agricult	2
315	MiddleAged	Man	Urban	NO	Medium	3.Agricult	2
317	Senior	Woman	Urban	NO	Medium	3.Agricult	2
322	Senior	Woman	Rural	NO	Medium	3.Agricult	2
325	MiddleAged	Man	Urban	NO	Medium	3.Agricult	2
333	MiddleAged	Woman	Urban	NO	Medium	3.Agricult	2
340	MiddleAged	Woman	Urban	NO	Medium	3.Agricult	2
344	MiddleAged	Woman	Urban	NO	Medium	3.Agricult	2
32	Senior	Woman	Rural	NO	Medium	3.Agricult	1
37	MiddleAged	Man	Urban	NO	Medium	3.Agricult	1
39	MiddleAged	Man	Rural	NO	Medium	3.Agricult	1
54	MiddleAged	Woman	Urban	NO	Medium	3.Agricult	1
55	MiddleAged	Man	Urban	NO	Medium	3.Agricult	1
57	MiddleAged	Man	Rural	NO	Medium	3.Agricult	1
78	MiddleAged	Woman	Urban	NO	Medium	3.Agricult	1
96	MiddleAged	Woman	Urban	NO	Medium	3.Agricult	1
98	Young	Man	Urban	NO	Medium	3.Agricult	1
100	MiddleAged	Man	Urban	NO	Medium	3.Agricult	1
121	MiddleAged	Woman	Urban	NO	Medium	3.Agricult	1
124	MiddleAged	Woman	Urban	NO	Medium	3.Agricult	1
149	MiddleAged	Woman	Urban	NO	Medium	3.Agricult	1
159	MiddleAged	Woman	Urban	NO	Medium	3.Agricult	1
175	MiddleAged	Woman	Urban	NO	Medium	3.Agricult	1
181	Senior	Man	Urban	NO	Medium	3.Agricult	1
182	MiddleAged	Man	Urban	NO	Medium	3.Agricult	1
205	Young	Man	Urban	NO	Medium	3.Agricult	1
216	MiddleAged	Woman	Urban	NO	Medium	3.Agricult	1
223	MiddleAged	Man	Urban	NO	Medium	3.Agricult	1
230	MiddleAged	Woman	Urban	NO	Medium	3.Agricult	1
237	MiddleAged	Woman	Urban	NO	Medium	3.Agricult	1
291	MiddleAged	Man	Urban	NO	Medium	3.Agricult	1
298	Young	Man	Urban	NO	Medium	3.Agricult	1
301	MiddleAged	Man	Urban	NO	Medium	3.Agricult	1
337	MiddleAged	Woman	Urban	NO	Medium	3.Agricult	1
48	MiddleAged	Man	Rural	NO	Medium	3.Agricult	3
20	MiddleAged	Woman	Urban	NO	Medium	3.Agricult	2
252	Senior	Woman	Urban	YES	Medium	3.Agricult	4
6	Young	Woman	Urban	YES	Medium	3.Agricult	3
23	MiddleAged	Man	Urban	YES	Medium	3.Agricult	3
105	Senior	Woman	Rural	YES	Medium	3.Agricult	3
134	MiddleAged	Woman	Urban	YES	Medium	3.Agricult	3
218	MiddleAged	Woman	Rural	YES	Medium	3.Agricult	3
255	MiddleAged	Man	Urban	YES	Medium	3.Agricult	3
280	Young	Woman	Urban	YES	Medium	3.Agricult	3
3	MiddleAged	Man	Urban	YES	Medium	3.Agricult	2
9	Young	Woman	Urban	YES	Medium	3.Agricult	2
11	MiddleAged	Man	Urban	YES	Medium	3.Agricult	2
14	MiddleAged	Woman	Urban	YES	Medium	3.Agricult	2
15	MiddleAged	Woman	Urban	YES	Medium	3.Agricult	2
24	MiddleAged	Woman	Urban	YES	Medium	3.Agricult	2
35	MiddleAged	Woman	Urban	YES	Medium	3.Agricult	2
42	MiddleAged	Man	Urban	YES	Medium	3.Agricult	2
47	Young	Man	Urban	YES	Medium	3.Agricult	2
82	MiddleAged	Man	Urban	YES	Medium	3.Agricult	2
102	Senior	Woman	Urban	YES	Medium	3.Agricult	2
126	MiddleAged	Man	Urban	YES	Medium	3.Agricult	2
127	Senior	Woman	Rural	YES	Medium	3.Agricult	2
130	Young	Woman	Urban	YES	Medium	3.Agricult	2
135	Senior	Man	Urban	YES	Medium	3.Agricult	2
138	Senior	Woman	Rural	YES	Medium	3.Agricult	2
155	MiddleAged	Man	Urban	YES	Medium	3.Agricult	2
157	MiddleAged	Woman	Urban	YES	Medium	3.Agricult	2
172	MiddleAged	Woman	Urban	YES	Medium	3.Agricult	2
188	MiddleAged	Man	Urban	YES	Medium	3.Agricult	2
191	MiddleAged	Woman	Urban	YES	Medium	3.Agricult	2
192	Young	Man	Urban	YES	Medium	3.Agricult	2
197	MiddleAged	Man	Rural	YES	Medium	3.Agricult	2
198	MiddleAged	Man	Urban	YES	Medium	3.Agricult	2
203	Senior	Man	Rural	YES	Medium	3.Agricult	2
209	Senior	Man	Rural	YES	Medium	3.Agricult	2
217	MiddleAged	Man	Urban	YES	Medium	3.Agricult	2
220	Senior	Woman	Rural	YES	Medium	3.Agricult	2
245	MiddleAged	Woman	Urban	YES	Medium	3.Agricult	2
297	MiddleAged	Man	Urban	YES	Medium	3.Agricult	2
302	MiddleAged	Woman	Urban	YES	Medium	3.Agricult	2
306	Senior	Man	Rural	YES	Medium	3.Agricult	2
311	Young	Woman	Rural	YES	Medium	3.Agricult	2
318	MiddleAged	Woman	Urban	YES	Medium	3.Agricult	2
328	MiddleAged	Woman	Urban	YES	Medium	3.Agricult	2
335	MiddleAged	Woman	Rural	YES	Medium	3.Agricult	2
336	MiddleAged	Woman	Urban	YES	Medium	3.Agricult	2
343	Senior	Woman	Rural	YES	Medium	3.Agricult	2
18	Young	Man	Urban	YES	Medium	3.Agricult	1
28	Young	Man	Rural	YES	Medium	3.Agricult	1
36	MiddleAged	Woman	Urban	YES	Medium	3.Agricult	1
46	MiddleAged	Woman	Urban	YES	Medium	3.Agricult	1
64	MiddleAged	Woman	Rural	YES	Medium	3.Agricult	1
73	MiddleAged	Man	Urban	YES	Medium	3.Agricult	1
74	MiddleAged	Woman	Urban	YES	Medium	3.Agricult	1
92	MiddleAged	Man	Urban	YES	Medium	3.Agricult	1
103	Young	Woman	Urban	YES	Medium	3.Agricult	1
111	MiddleAged	Woman	Rural	YES	Medium	3.Agricult	1
123	Young	Man	Urban	YES	Medium	3.Agricult	1
132	Young	Man	Urban	YES	Medium	3.Agricult	1
140	MiddleAged	Man	Rural	YES	Medium	3.Agricult	1
161	MiddleAged	Woman	Rural	YES	Medium	3.Agricult	1
170	MiddleAged	Woman	Urban	YES	Medium	3.Agricult	1
186	MiddleAged	Woman	Rural	YES	Medium	3.Agricult	1
199	Young	Woman	Rural	YES	Medium	3.Agricult	1
201	Senior	Woman	Urban	YES	Medium	3.Agricult	1
204	MiddleAged	Woman	Rural	YES	Medium	3.Agricult	1
226	Young	Man	Urban	YES	Medium	3.Agricult	1
227	Senior	Woman	Rural	YES	Medium	3.Agricult	1
232	Young	Man	Urban	YES	Medium	3.Agricult	1
249	MiddleAged	Man	Urban	YES	Medium	3.Agricult	1
277	Senior	Man	Rural	YES	Medium	3.Agricult	1
279	Young	Woman	Urban	YES	Medium	3.Agricult	1
283	Young	Woman	Urban	YES	Medium	3.Agricult	1
285	MiddleAged	Woman	Rural	YES	Medium	3.Agricult	1
290	Young	Man	Urban	YES	Medium	3.Agricult	1
295	Senior	Woman	Urban	YES	Medium	3.Agricult	1
296	Senior	Woman	Rural	YES	Medium	3.Agricult	1
305	MiddleAged	Woman	Rural	YES	Medium	3.Agricult	1
309	MiddleAged	Man	Rural	YES	Medium	3.Agricult	1
310	MiddleAged	Woman	Rural	YES	Medium	3.Agricult	1
320	MiddleAged	Woman	Rural	YES	Medium	3.Agricult	1
1	MiddleAged	Woman	Urban	NO	Medium	3.OakForest	4
54	MiddleAged	Woman	Urban	NO	Medium	3.OakForest	4
55	MiddleAged	Man	Urban	NO	Medium	3.OakForest	4
84	Senior	Man	Urban	NO	Medium	3.OakForest	4
90	MiddleAged	Woman	Urban	NO	Medium	3.OakForest	4
100	MiddleAged	Man	Urban	NO	Medium	3.OakForest	4
101	Senior	Man	Rural	NO	Medium	3.OakForest	4
124	MiddleAged	Woman	Urban	NO	Medium	3.OakForest	4
149	MiddleAged	Woman	Urban	NO	Medium	3.OakForest	4
159	MiddleAged	Woman	Urban	NO	Medium	3.OakForest	4
163	Senior	Woman	Urban	NO	Medium	3.OakForest	4
223	MiddleAged	Man	Urban	NO	Medium	3.OakForest	4
244	Young	Man	Urban	NO	Medium	3.OakForest	4
254	MiddleAged	Woman	Urban	NO	Medium	3.OakForest	4
317	Senior	Woman	Urban	NO	Medium	3.OakForest	4
321	Senior	Man	Urban	NO	Medium	3.OakForest	4
31	MiddleAged	Woman	Urban	NO	Medium	3.OakForest	3
39	MiddleAged	Man	Rural	NO	Medium	3.OakForest	3
57	MiddleAged	Man	Rural	NO	Medium	3.OakForest	3
60	Senior	Woman	Urban	NO	Medium	3.OakForest	3
65	MiddleAged	Woman	Urban	NO	Medium	3.OakForest	3
68	MiddleAged	Woman	Urban	NO	Medium	3.OakForest	3
78	MiddleAged	Woman	Urban	NO	Medium	3.OakForest	3
79	MiddleAged	Man	Urban	NO	Medium	3.OakForest	3
89	Young	Woman	Rural	NO	Medium	3.OakForest	3
95	Young	Woman	Urban	NO	Medium	3.OakForest	3
98	Young	Man	Urban	NO	Medium	3.OakForest	3
106	MiddleAged	Man	Urban	NO	Medium	3.OakForest	3
113	Senior	Woman	Urban	NO	Medium	3.OakForest	3
114	Young	Woman	Urban	NO	Medium	3.OakForest	3
117	MiddleAged	Man	Urban	NO	Medium	3.OakForest	3
119	MiddleAged	Woman	Urban	NO	Medium	3.OakForest	3
146	MiddleAged	Woman	Urban	NO	Medium	3.OakForest	3
162	MiddleAged	Woman	Urban	NO	Medium	3.OakForest	3
206	MiddleAged	Woman	Urban	NO	Medium	3.OakForest	3
237	MiddleAged	Woman	Urban	NO	Medium	3.OakForest	3
246	Senior	Woman	Rural	NO	Medium	3.OakForest	3
251	MiddleAged	Woman	Urban	NO	Medium	3.OakForest	3
257	MiddleAged	Woman	Urban	NO	Medium	3.OakForest	3
291	MiddleAged	Man	Urban	NO	Medium	3.OakForest	3
313	MiddleAged	Man	Urban	NO	Medium	3.OakForest	3
315	MiddleAged	Man	Urban	NO	Medium	3.OakForest	3
330	MiddleAged	Woman	Urban	NO	Medium	3.OakForest	3
333	MiddleAged	Woman	Urban	NO	Medium	3.OakForest	3
344	MiddleAged	Woman	Urban	NO	Medium	3.OakForest	3
17	Senior	Woman	Rural	NO	Medium	3.OakForest	2
25	MiddleAged	Man	Urban	NO	Medium	3.OakForest	2
32	Senior	Woman	Rural	NO	Medium	3.OakForest	2
37	MiddleAged	Man	Urban	NO	Medium	3.OakForest	2
43	MiddleAged	Man	Rural	NO	Medium	3.OakForest	2
49	Senior	Woman	Urban	NO	Medium	3.OakForest	2
70	MiddleAged	Woman	Urban	NO	Medium	3.OakForest	2
76	MiddleAged	Woman	Urban	NO	Medium	3.OakForest	2
121	MiddleAged	Woman	Urban	NO	Medium	3.OakForest	2
139	Senior	Man	Urban	NO	Medium	3.OakForest	2
143	MiddleAged	Man	Urban	NO	Medium	3.OakForest	2
151	MiddleAged	Woman	Urban	NO	Medium	3.OakForest	2
160	MiddleAged	Man	Urban	NO	Medium	3.OakForest	2
168	MiddleAged	Woman	Urban	NO	Medium	3.OakForest	2
175	MiddleAged	Woman	Urban	NO	Medium	3.OakForest	2
177	MiddleAged	Man	Urban	NO	Medium	3.OakForest	2
181	Senior	Man	Urban	NO	Medium	3.OakForest	2
184	MiddleAged	Man	Urban	NO	Medium	3.OakForest	2
187	Senior	Woman	Urban	NO	Medium	3.OakForest	2
195	MiddleAged	Woman	Urban	NO	Medium	3.OakForest	2
205	Young	Man	Urban	NO	Medium	3.OakForest	2
212	MiddleAged	Woman	Urban	NO	Medium	3.OakForest	2
214	MiddleAged	Man	Urban	NO	Medium	3.OakForest	2
230	MiddleAged	Woman	Urban	NO	Medium	3.OakForest	2
236	MiddleAged	Man	Urban	NO	Medium	3.OakForest	2
239	MiddleAged	Man	Urban	NO	Medium	3.OakForest	2
250	MiddleAged	Man	Urban	NO	Medium	3.OakForest	2
264	MiddleAged	Man	Urban	NO	Medium	3.OakForest	2
267	MiddleAged	Man	Urban	NO	Medium	3.OakForest	2
270	Young	Woman	Urban	NO	Medium	3.OakForest	2
274	MiddleAged	Man	Urban	NO	Medium	3.OakForest	2
284	MiddleAged	Woman	Urban	NO	Medium	3.OakForest	2
298	Young	Man	Urban	NO	Medium	3.OakForest	2
325	MiddleAged	Man	Urban	NO	Medium	3.OakForest	2
337	MiddleAged	Woman	Urban	NO	Medium	3.OakForest	2
340	MiddleAged	Woman	Urban	NO	Medium	3.OakForest	2
75	Young	Woman	Urban	NO	Medium	3.OakForest	1
96	MiddleAged	Woman	Urban	NO	Medium	3.OakForest	1
169	MiddleAged	Woman	Urban	NO	Medium	3.OakForest	1
182	MiddleAged	Man	Urban	NO	Medium	3.OakForest	1
216	MiddleAged	Woman	Urban	NO	Medium	3.OakForest	1
301	MiddleAged	Man	Urban	NO	Medium	3.OakForest	1
322	Senior	Woman	Rural	NO	Medium	3.OakForest	1
48	MiddleAged	Man	Rural	NO	Medium	3.OakForest	3
20	MiddleAged	Woman	Urban	NO	Medium	3.OakForest	2
6	Young	Woman	Urban	YES	Medium	3.OakForest	4
15	MiddleAged	Woman	Urban	YES	Medium	3.OakForest	4
92	MiddleAged	Man	Urban	YES	Medium	3.OakForest	4
127	Senior	Woman	Rural	YES	Medium	3.OakForest	4
170	MiddleAged	Woman	Urban	YES	Medium	3.OakForest	4
197	MiddleAged	Man	Rural	YES	Medium	3.OakForest	4
297	MiddleAged	Man	Urban	YES	Medium	3.OakForest	4
306	Senior	Man	Rural	YES	Medium	3.OakForest	4
328	MiddleAged	Woman	Urban	YES	Medium	3.OakForest	4
9	Young	Woman	Urban	YES	Medium	3.OakForest	3
14	MiddleAged	Woman	Urban	YES	Medium	3.OakForest	3
23	MiddleAged	Man	Urban	YES	Medium	3.OakForest	3
24	MiddleAged	Woman	Urban	YES	Medium	3.OakForest	3
35	MiddleAged	Woman	Urban	YES	Medium	3.OakForest	3
42	MiddleAged	Man	Urban	YES	Medium	3.OakForest	3
64	MiddleAged	Woman	Rural	YES	Medium	3.OakForest	3
74	MiddleAged	Woman	Urban	YES	Medium	3.OakForest	3
102	Senior	Woman	Urban	YES	Medium	3.OakForest	3
155	MiddleAged	Man	Urban	YES	Medium	3.OakForest	3
157	MiddleAged	Woman	Urban	YES	Medium	3.OakForest	3
172	MiddleAged	Woman	Urban	YES	Medium	3.OakForest	3
198	MiddleAged	Man	Urban	YES	Medium	3.OakForest	3
203	Senior	Man	Rural	YES	Medium	3.OakForest	3
209	Senior	Man	Rural	YES	Medium	3.OakForest	3
220	Senior	Woman	Rural	YES	Medium	3.OakForest	3
232	Young	Man	Urban	YES	Medium	3.OakForest	3
245	MiddleAged	Woman	Urban	YES	Medium	3.OakForest	3
249	MiddleAged	Man	Urban	YES	Medium	3.OakForest	3
252	Senior	Woman	Urban	YES	Medium	3.OakForest	3
279	Young	Woman	Urban	YES	Medium	3.OakForest	3
290	Young	Man	Urban	YES	Medium	3.OakForest	3
302	MiddleAged	Woman	Urban	YES	Medium	3.OakForest	3
305	MiddleAged	Woman	Rural	YES	Medium	3.OakForest	3
335	MiddleAged	Woman	Rural	YES	Medium	3.OakForest	3
336	MiddleAged	Woman	Urban	YES	Medium	3.OakForest	3
3	MiddleAged	Man	Urban	YES	Medium	3.OakForest	2
28	Young	Man	Rural	YES	Medium	3.OakForest	2
36	MiddleAged	Woman	Urban	YES	Medium	3.OakForest	2
47	Young	Man	Urban	YES	Medium	3.OakForest	2
73	MiddleAged	Man	Urban	YES	Medium	3.OakForest	2
103	Young	Woman	Urban	YES	Medium	3.OakForest	2
105	Senior	Woman	Rural	YES	Medium	3.OakForest	2
111	MiddleAged	Woman	Rural	YES	Medium	3.OakForest	2
123	Young	Man	Urban	YES	Medium	3.OakForest	2
126	MiddleAged	Man	Urban	YES	Medium	3.OakForest	2
130	Young	Woman	Urban	YES	Medium	3.OakForest	2
132	Young	Man	Urban	YES	Medium	3.OakForest	2
134	MiddleAged	Woman	Urban	YES	Medium	3.OakForest	2
135	Senior	Man	Urban	YES	Medium	3.OakForest	2
138	Senior	Woman	Rural	YES	Medium	3.OakForest	2
161	MiddleAged	Woman	Rural	YES	Medium	3.OakForest	2
186	MiddleAged	Woman	Rural	YES	Medium	3.OakForest	2
188	MiddleAged	Man	Urban	YES	Medium	3.OakForest	2
191	MiddleAged	Woman	Urban	YES	Medium	3.OakForest	2
192	Young	Man	Urban	YES	Medium	3.OakForest	2
199	Young	Woman	Rural	YES	Medium	3.OakForest	2
201	Senior	Woman	Urban	YES	Medium	3.OakForest	2
204	MiddleAged	Woman	Rural	YES	Medium	3.OakForest	2
217	MiddleAged	Man	Urban	YES	Medium	3.OakForest	2
218	MiddleAged	Woman	Rural	YES	Medium	3.OakForest	2
226	Young	Man	Urban	YES	Medium	3.OakForest	2
227	Senior	Woman	Rural	YES	Medium	3.OakForest	2
255	MiddleAged	Man	Urban	YES	Medium	3.OakForest	2
280	Young	Woman	Urban	YES	Medium	3.OakForest	2
283	Young	Woman	Urban	YES	Medium	3.OakForest	2
285	MiddleAged	Woman	Rural	YES	Medium	3.OakForest	2
295	Senior	Woman	Urban	YES	Medium	3.OakForest	2
296	Senior	Woman	Rural	YES	Medium	3.OakForest	2
309	MiddleAged	Man	Rural	YES	Medium	3.OakForest	2
311	Young	Woman	Rural	YES	Medium	3.OakForest	2
320	MiddleAged	Woman	Rural	YES	Medium	3.OakForest	2
11	MiddleAged	Man	Urban	YES	Medium	3.OakForest	1
18	Young	Man	Urban	YES	Medium	3.OakForest	1
46	MiddleAged	Woman	Urban	YES	Medium	3.OakForest	1
82	MiddleAged	Man	Urban	YES	Medium	3.OakForest	1
140	MiddleAged	Man	Rural	YES	Medium	3.OakForest	1
277	Senior	Man	Rural	YES	Medium	3.OakForest	1
310	MiddleAged	Woman	Rural	YES	Medium	3.OakForest	1
318	MiddleAged	Woman	Urban	YES	Medium	3.OakForest	1
343	Senior	Woman	Rural	YES	Medium	3.OakForest	1
1	MiddleAged	Woman	Urban	NO	Medium	3.Eucalypt Pl.	4
31	MiddleAged	Woman	Urban	NO	Medium	3.Eucalypt Pl.	4
43	MiddleAged	Man	Rural	NO	Medium	3.Eucalypt Pl.	4
54	MiddleAged	Woman	Urban	NO	Medium	3.Eucalypt Pl.	4
79	MiddleAged	Man	Urban	NO	Medium	3.Eucalypt Pl.	4
84	Senior	Man	Urban	NO	Medium	3.Eucalypt Pl.	4
90	MiddleAged	Woman	Urban	NO	Medium	3.Eucalypt Pl.	4
100	MiddleAged	Man	Urban	NO	Medium	3.Eucalypt Pl.	4
101	Senior	Man	Rural	NO	Medium	3.Eucalypt Pl.	4
114	Young	Woman	Urban	NO	Medium	3.Eucalypt Pl.	4
117	MiddleAged	Man	Urban	NO	Medium	3.Eucalypt Pl.	4
143	MiddleAged	Man	Urban	NO	Medium	3.Eucalypt Pl.	4
146	MiddleAged	Woman	Urban	NO	Medium	3.Eucalypt Pl.	4
195	MiddleAged	Woman	Urban	NO	Medium	3.Eucalypt Pl.	4
230	MiddleAged	Woman	Urban	NO	Medium	3.Eucalypt Pl.	4
237	MiddleAged	Woman	Urban	NO	Medium	3.Eucalypt Pl.	4
244	Young	Man	Urban	NO	Medium	3.Eucalypt Pl.	4
246	Senior	Woman	Rural	NO	Medium	3.Eucalypt Pl.	4
250	MiddleAged	Man	Urban	NO	Medium	3.Eucalypt Pl.	4
264	MiddleAged	Man	Urban	NO	Medium	3.Eucalypt Pl.	4
267	MiddleAged	Man	Urban	NO	Medium	3.Eucalypt Pl.	4
291	MiddleAged	Man	Urban	NO	Medium	3.Eucalypt Pl.	4
315	MiddleAged	Man	Urban	NO	Medium	3.Eucalypt Pl.	4
317	Senior	Woman	Urban	NO	Medium	3.Eucalypt Pl.	4
321	Senior	Man	Urban	NO	Medium	3.Eucalypt Pl.	4
322	Senior	Woman	Rural	NO	Medium	3.Eucalypt Pl.	4
333	MiddleAged	Woman	Urban	NO	Medium	3.Eucalypt Pl.	4
340	MiddleAged	Woman	Urban	NO	Medium	3.Eucalypt Pl.	4
17	Senior	Woman	Rural	NO	Medium	3.Eucalypt Pl.	3
25	MiddleAged	Man	Urban	NO	Medium	3.Eucalypt Pl.	3
37	MiddleAged	Man	Urban	NO	Medium	3.Eucalypt Pl.	3
39	MiddleAged	Man	Rural	NO	Medium	3.Eucalypt Pl.	3
49	Senior	Woman	Urban	NO	Medium	3.Eucalypt Pl.	3
55	MiddleAged	Man	Urban	NO	Medium	3.Eucalypt Pl.	3
57	MiddleAged	Man	Rural	NO	Medium	3.Eucalypt Pl.	3
60	Senior	Woman	Urban	NO	Medium	3.Eucalypt Pl.	3
65	MiddleAged	Woman	Urban	NO	Medium	3.Eucalypt Pl.	3
68	MiddleAged	Woman	Urban	NO	Medium	3.Eucalypt Pl.	3
70	MiddleAged	Woman	Urban	NO	Medium	3.Eucalypt Pl.	3
75	Young	Woman	Urban	NO	Medium	3.Eucalypt Pl.	3
76	MiddleAged	Woman	Urban	NO	Medium	3.Eucalypt Pl.	3
78	MiddleAged	Woman	Urban	NO	Medium	3.Eucalypt Pl.	3
89	Young	Woman	Rural	NO	Medium	3.Eucalypt Pl.	3
95	Young	Woman	Urban	NO	Medium	3.Eucalypt Pl.	3
98	Young	Man	Urban	NO	Medium	3.Eucalypt Pl.	3
106	MiddleAged	Man	Urban	NO	Medium	3.Eucalypt Pl.	3
113	Senior	Woman	Urban	NO	Medium	3.Eucalypt Pl.	3
119	MiddleAged	Woman	Urban	NO	Medium	3.Eucalypt Pl.	3
121	MiddleAged	Woman	Urban	NO	Medium	3.Eucalypt Pl.	3
124	MiddleAged	Woman	Urban	NO	Medium	3.Eucalypt Pl.	3
139	Senior	Man	Urban	NO	Medium	3.Eucalypt Pl.	3
149	MiddleAged	Woman	Urban	NO	Medium	3.Eucalypt Pl.	3
151	MiddleAged	Woman	Urban	NO	Medium	3.Eucalypt Pl.	3
159	MiddleAged	Woman	Urban	NO	Medium	3.Eucalypt Pl.	3
160	MiddleAged	Man	Urban	NO	Medium	3.Eucalypt Pl.	3
162	MiddleAged	Woman	Urban	NO	Medium	3.Eucalypt Pl.	3
163	Senior	Woman	Urban	NO	Medium	3.Eucalypt Pl.	3
168	MiddleAged	Woman	Urban	NO	Medium	3.Eucalypt Pl.	3
169	MiddleAged	Woman	Urban	NO	Medium	3.Eucalypt Pl.	3
175	MiddleAged	Woman	Urban	NO	Medium	3.Eucalypt Pl.	3
177	MiddleAged	Man	Urban	NO	Medium	3.Eucalypt Pl.	3
181	Senior	Man	Urban	NO	Medium	3.Eucalypt Pl.	3
182	MiddleAged	Man	Urban	NO	Medium	3.Eucalypt Pl.	3
184	MiddleAged	Man	Urban	NO	Medium	3.Eucalypt Pl.	3
187	Senior	Woman	Urban	NO	Medium	3.Eucalypt Pl.	3
205	Young	Man	Urban	NO	Medium	3.Eucalypt Pl.	3
206	MiddleAged	Woman	Urban	NO	Medium	3.Eucalypt Pl.	3
212	MiddleAged	Woman	Urban	NO	Medium	3.Eucalypt Pl.	3
214	MiddleAged	Man	Urban	NO	Medium	3.Eucalypt Pl.	3
216	MiddleAged	Woman	Urban	NO	Medium	3.Eucalypt Pl.	3
223	MiddleAged	Man	Urban	NO	Medium	3.Eucalypt Pl.	3
236	MiddleAged	Man	Urban	NO	Medium	3.Eucalypt Pl.	3
239	MiddleAged	Man	Urban	NO	Medium	3.Eucalypt Pl.	3
251	MiddleAged	Woman	Urban	NO	Medium	3.Eucalypt Pl.	3
254	MiddleAged	Woman	Urban	NO	Medium	3.Eucalypt Pl.	3
257	MiddleAged	Woman	Urban	NO	Medium	3.Eucalypt Pl.	3
270	Young	Woman	Urban	NO	Medium	3.Eucalypt Pl.	3
274	MiddleAged	Man	Urban	NO	Medium	3.Eucalypt Pl.	3
284	MiddleAged	Woman	Urban	NO	Medium	3.Eucalypt Pl.	3
298	Young	Man	Urban	NO	Medium	3.Eucalypt Pl.	3
313	MiddleAged	Man	Urban	NO	Medium	3.Eucalypt Pl.	3
325	MiddleAged	Man	Urban	NO	Medium	3.Eucalypt Pl.	3
330	MiddleAged	Woman	Urban	NO	Medium	3.Eucalypt Pl.	3
337	MiddleAged	Woman	Urban	NO	Medium	3.Eucalypt Pl.	3
344	MiddleAged	Woman	Urban	NO	Medium	3.Eucalypt Pl.	3
32	Senior	Woman	Rural	NO	Medium	3.Eucalypt Pl.	2
96	MiddleAged	Woman	Urban	NO	Medium	3.Eucalypt Pl.	2
301	MiddleAged	Man	Urban	NO	Medium	3.Eucalypt Pl.	2
20	MiddleAged	Woman	Urban	NO	Medium	3.Eucalypt Pl.	4
48	MiddleAged	Man	Rural	NO	Medium	3.Eucalypt Pl.	3
6	Young	Woman	Urban	YES	Medium	3.Eucalypt Pl.	4
14	MiddleAged	Woman	Urban	YES	Medium	3.Eucalypt Pl.	4
15	MiddleAged	Woman	Urban	YES	Medium	3.Eucalypt Pl.	4
35	MiddleAged	Woman	Urban	YES	Medium	3.Eucalypt Pl.	4
105	Senior	Woman	Rural	YES	Medium	3.Eucalypt Pl.	4
126	MiddleAged	Man	Urban	YES	Medium	3.Eucalypt Pl.	4
127	Senior	Woman	Rural	YES	Medium	3.Eucalypt Pl.	4
157	MiddleAged	Woman	Urban	YES	Medium	3.Eucalypt Pl.	4
170	MiddleAged	Woman	Urban	YES	Medium	3.Eucalypt Pl.	4
218	MiddleAged	Woman	Rural	YES	Medium	3.Eucalypt Pl.	4
220	Senior	Woman	Rural	YES	Medium	3.Eucalypt Pl.	4
252	Senior	Woman	Urban	YES	Medium	3.Eucalypt Pl.	4
255	MiddleAged	Man	Urban	YES	Medium	3.Eucalypt Pl.	4
283	Young	Woman	Urban	YES	Medium	3.Eucalypt Pl.	4
297	MiddleAged	Man	Urban	YES	Medium	3.Eucalypt Pl.	4
306	Senior	Man	Rural	YES	Medium	3.Eucalypt Pl.	4
310	MiddleAged	Woman	Rural	YES	Medium	3.Eucalypt Pl.	4
320	MiddleAged	Woman	Rural	YES	Medium	3.Eucalypt Pl.	4
328	MiddleAged	Woman	Urban	YES	Medium	3.Eucalypt Pl.	4
335	MiddleAged	Woman	Rural	YES	Medium	3.Eucalypt Pl.	4
336	MiddleAged	Woman	Urban	YES	Medium	3.Eucalypt Pl.	4
343	Senior	Woman	Rural	YES	Medium	3.Eucalypt Pl.	4
3	MiddleAged	Man	Urban	YES	Medium	3.Eucalypt Pl.	3
9	Young	Woman	Urban	YES	Medium	3.Eucalypt Pl.	3
11	MiddleAged	Man	Urban	YES	Medium	3.Eucalypt Pl.	3
18	Young	Man	Urban	YES	Medium	3.Eucalypt Pl.	3
23	MiddleAged	Man	Urban	YES	Medium	3.Eucalypt Pl.	3
24	MiddleAged	Woman	Urban	YES	Medium	3.Eucalypt Pl.	3
28	Young	Man	Rural	YES	Medium	3.Eucalypt Pl.	3
36	MiddleAged	Woman	Urban	YES	Medium	3.Eucalypt Pl.	3
42	MiddleAged	Man	Urban	YES	Medium	3.Eucalypt Pl.	3
46	MiddleAged	Woman	Urban	YES	Medium	3.Eucalypt Pl.	3
73	MiddleAged	Man	Urban	YES	Medium	3.Eucalypt Pl.	3
74	MiddleAged	Woman	Urban	YES	Medium	3.Eucalypt Pl.	3
82	MiddleAged	Man	Urban	YES	Medium	3.Eucalypt Pl.	3
92	MiddleAged	Man	Urban	YES	Medium	3.Eucalypt Pl.	3
102	Senior	Woman	Urban	YES	Medium	3.Eucalypt Pl.	3
103	Young	Woman	Urban	YES	Medium	3.Eucalypt Pl.	3
111	MiddleAged	Woman	Rural	YES	Medium	3.Eucalypt Pl.	3
123	Young	Man	Urban	YES	Medium	3.Eucalypt Pl.	3
130	Young	Woman	Urban	YES	Medium	3.Eucalypt Pl.	3
132	Young	Man	Urban	YES	Medium	3.Eucalypt Pl.	3
134	MiddleAged	Woman	Urban	YES	Medium	3.Eucalypt Pl.	3
135	Senior	Man	Urban	YES	Medium	3.Eucalypt Pl.	3
155	MiddleAged	Man	Urban	YES	Medium	3.Eucalypt Pl.	3
161	MiddleAged	Woman	Rural	YES	Medium	3.Eucalypt Pl.	3
172	MiddleAged	Woman	Urban	YES	Medium	3.Eucalypt Pl.	3
186	MiddleAged	Woman	Rural	YES	Medium	3.Eucalypt Pl.	3
188	MiddleAged	Man	Urban	YES	Medium	3.Eucalypt Pl.	3
191	MiddleAged	Woman	Urban	YES	Medium	3.Eucalypt Pl.	3
192	Young	Man	Urban	YES	Medium	3.Eucalypt Pl.	3
198	MiddleAged	Man	Urban	YES	Medium	3.Eucalypt Pl.	3
199	Young	Woman	Rural	YES	Medium	3.Eucalypt Pl.	3
201	Senior	Woman	Urban	YES	Medium	3.Eucalypt Pl.	3
203	Senior	Man	Rural	YES	Medium	3.Eucalypt Pl.	3
209	Senior	Man	Rural	YES	Medium	3.Eucalypt Pl.	3
217	MiddleAged	Man	Urban	YES	Medium	3.Eucalypt Pl.	3
226	Young	Man	Urban	YES	Medium	3.Eucalypt Pl.	3
245	MiddleAged	Woman	Urban	YES	Medium	3.Eucalypt Pl.	3
249	MiddleAged	Man	Urban	YES	Medium	3.Eucalypt Pl.	3
279	Young	Woman	Urban	YES	Medium	3.Eucalypt Pl.	3
285	MiddleAged	Woman	Rural	YES	Medium	3.Eucalypt Pl.	3
290	Young	Man	Urban	YES	Medium	3.Eucalypt Pl.	3
295	Senior	Woman	Urban	YES	Medium	3.Eucalypt Pl.	3
296	Senior	Woman	Rural	YES	Medium	3.Eucalypt Pl.	3
302	MiddleAged	Woman	Urban	YES	Medium	3.Eucalypt Pl.	3
309	MiddleAged	Man	Rural	YES	Medium	3.Eucalypt Pl.	3
311	Young	Woman	Rural	YES	Medium	3.Eucalypt Pl.	3
318	MiddleAged	Woman	Urban	YES	Medium	3.Eucalypt Pl.	3
47	Young	Man	Urban	YES	Medium	3.Eucalypt Pl.	2
64	MiddleAged	Woman	Rural	YES	Medium	3.Eucalypt Pl.	2
138	Senior	Woman	Rural	YES	Medium	3.Eucalypt Pl.	2
204	MiddleAged	Woman	Rural	YES	Medium	3.Eucalypt Pl.	2
227	Senior	Woman	Rural	YES	Medium	3.Eucalypt Pl.	2
232	Young	Man	Urban	YES	Medium	3.Eucalypt Pl.	2
305	MiddleAged	Woman	Rural	YES	Medium	3.Eucalypt Pl.	2
140	MiddleAged	Man	Rural	YES	Medium	3.Eucalypt Pl.	1
197	MiddleAged	Man	Rural	YES	Medium	3.Eucalypt Pl.	1
277	Senior	Man	Rural	YES	Medium	3.Eucalypt Pl.	1
280	Young	Woman	Urban	YES	Medium	3.Eucalypt Pl.	1
1	MiddleAged	Woman	Urban	NO	Medium	3.Mixed forest	4
32	Senior	Woman	Rural	NO	Medium	3.Mixed forest	4
54	MiddleAged	Woman	Urban	NO	Medium	3.Mixed forest	4
55	MiddleAged	Man	Urban	NO	Medium	3.Mixed forest	4
57	MiddleAged	Man	Rural	NO	Medium	3.Mixed forest	4
60	Senior	Woman	Urban	NO	Medium	3.Mixed forest	4
65	MiddleAged	Woman	Urban	NO	Medium	3.Mixed forest	4
84	Senior	Man	Urban	NO	Medium	3.Mixed forest	4
89	Young	Woman	Rural	NO	Medium	3.Mixed forest	4
90	MiddleAged	Woman	Urban	NO	Medium	3.Mixed forest	4
100	MiddleAged	Man	Urban	NO	Medium	3.Mixed forest	4
101	Senior	Man	Rural	NO	Medium	3.Mixed forest	4
114	Young	Woman	Urban	NO	Medium	3.Mixed forest	4
124	MiddleAged	Woman	Urban	NO	Medium	3.Mixed forest	4
149	MiddleAged	Woman	Urban	NO	Medium	3.Mixed forest	4
163	Senior	Woman	Urban	NO	Medium	3.Mixed forest	4
223	MiddleAged	Man	Urban	NO	Medium	3.Mixed forest	4
236	MiddleAged	Man	Urban	NO	Medium	3.Mixed forest	4
244	Young	Man	Urban	NO	Medium	3.Mixed forest	4
250	MiddleAged	Man	Urban	NO	Medium	3.Mixed forest	4
251	MiddleAged	Woman	Urban	NO	Medium	3.Mixed forest	4
315	MiddleAged	Man	Urban	NO	Medium	3.Mixed forest	4
317	Senior	Woman	Urban	NO	Medium	3.Mixed forest	4
321	Senior	Man	Urban	NO	Medium	3.Mixed forest	4
337	MiddleAged	Woman	Urban	NO	Medium	3.Mixed forest	4
340	MiddleAged	Woman	Urban	NO	Medium	3.Mixed forest	4
17	Senior	Woman	Rural	NO	Medium	3.Mixed forest	3
25	MiddleAged	Man	Urban	NO	Medium	3.Mixed forest	3
31	MiddleAged	Woman	Urban	NO	Medium	3.Mixed forest	3
37	MiddleAged	Man	Urban	NO	Medium	3.Mixed forest	3
39	MiddleAged	Man	Rural	NO	Medium	3.Mixed forest	3
49	Senior	Woman	Urban	NO	Medium	3.Mixed forest	3
68	MiddleAged	Woman	Urban	NO	Medium	3.Mixed forest	3
78	MiddleAged	Woman	Urban	NO	Medium	3.Mixed forest	3
79	MiddleAged	Man	Urban	NO	Medium	3.Mixed forest	3
95	Young	Woman	Urban	NO	Medium	3.Mixed forest	3
106	MiddleAged	Man	Urban	NO	Medium	3.Mixed forest	3
113	Senior	Woman	Urban	NO	Medium	3.Mixed forest	3
117	MiddleAged	Man	Urban	NO	Medium	3.Mixed forest	3
119	MiddleAged	Woman	Urban	NO	Medium	3.Mixed forest	3
139	Senior	Man	Urban	NO	Medium	3.Mixed forest	3
143	MiddleAged	Man	Urban	NO	Medium	3.Mixed forest	3
146	MiddleAged	Woman	Urban	NO	Medium	3.Mixed forest	3
151	MiddleAged	Woman	Urban	NO	Medium	3.Mixed forest	3
159	MiddleAged	Woman	Urban	NO	Medium	3.Mixed forest	3
162	MiddleAged	Woman	Urban	NO	Medium	3.Mixed forest	3
168	MiddleAged	Woman	Urban	NO	Medium	3.Mixed forest	3
169	MiddleAged	Woman	Urban	NO	Medium	3.Mixed forest	3
175	MiddleAged	Woman	Urban	NO	Medium	3.Mixed forest	3
177	MiddleAged	Man	Urban	NO	Medium	3.Mixed forest	3
181	Senior	Man	Urban	NO	Medium	3.Mixed forest	3
182	MiddleAged	Man	Urban	NO	Medium	3.Mixed forest	3
184	MiddleAged	Man	Urban	NO	Medium	3.Mixed forest	3
187	Senior	Woman	Urban	NO	Medium	3.Mixed forest	3
195	MiddleAged	Woman	Urban	NO	Medium	3.Mixed forest	3
206	MiddleAged	Woman	Urban	NO	Medium	3.Mixed forest	3
212	MiddleAged	Woman	Urban	NO	Medium	3.Mixed forest	3
216	MiddleAged	Woman	Urban	NO	Medium	3.Mixed forest	3
230	MiddleAged	Woman	Urban	NO	Medium	3.Mixed forest	3
239	MiddleAged	Man	Urban	NO	Medium	3.Mixed forest	3
246	Senior	Woman	Rural	NO	Medium	3.Mixed forest	3
254	MiddleAged	Woman	Urban	NO	Medium	3.Mixed forest	3
257	MiddleAged	Woman	Urban	NO	Medium	3.Mixed forest	3
264	MiddleAged	Man	Urban	NO	Medium	3.Mixed forest	3
267	MiddleAged	Man	Urban	NO	Medium	3.Mixed forest	3
270	Young	Woman	Urban	NO	Medium	3.Mixed forest	3
274	MiddleAged	Man	Urban	NO	Medium	3.Mixed forest	3
284	MiddleAged	Woman	Urban	NO	Medium	3.Mixed forest	3
298	Young	Man	Urban	NO	Medium	3.Mixed forest	3
313	MiddleAged	Man	Urban	NO	Medium	3.Mixed forest	3
322	Senior	Woman	Rural	NO	Medium	3.Mixed forest	3
325	MiddleAged	Man	Urban	NO	Medium	3.Mixed forest	3
330	MiddleAged	Woman	Urban	NO	Medium	3.Mixed forest	3
333	MiddleAged	Woman	Urban	NO	Medium	3.Mixed forest	3
344	MiddleAged	Woman	Urban	NO	Medium	3.Mixed forest	3
43	MiddleAged	Man	Rural	NO	Medium	3.Mixed forest	2
70	MiddleAged	Woman	Urban	NO	Medium	3.Mixed forest	2
75	Young	Woman	Urban	NO	Medium	3.Mixed forest	2
76	MiddleAged	Woman	Urban	NO	Medium	3.Mixed forest	2
96	MiddleAged	Woman	Urban	NO	Medium	3.Mixed forest	2
98	Young	Man	Urban	NO	Medium	3.Mixed forest	2
121	MiddleAged	Woman	Urban	NO	Medium	3.Mixed forest	2
160	MiddleAged	Man	Urban	NO	Medium	3.Mixed forest	2
205	Young	Man	Urban	NO	Medium	3.Mixed forest	2
214	MiddleAged	Man	Urban	NO	Medium	3.Mixed forest	2
237	MiddleAged	Woman	Urban	NO	Medium	3.Mixed forest	2
291	MiddleAged	Man	Urban	NO	Medium	3.Mixed forest	2
301	MiddleAged	Man	Urban	NO	Medium	3.Mixed forest	2
20	MiddleAged	Woman	Urban	NO	Medium	3.Mixed forest	3
48	MiddleAged	Man	Rural	NO	Medium	3.Mixed forest	3
6	Young	Woman	Urban	YES	Medium	3.Mixed forest	4
15	MiddleAged	Woman	Urban	YES	Medium	3.Mixed forest	4
47	Young	Man	Urban	YES	Medium	3.Mixed forest	4
64	MiddleAged	Woman	Rural	YES	Medium	3.Mixed forest	4
92	MiddleAged	Man	Urban	YES	Medium	3.Mixed forest	4
127	Senior	Woman	Rural	YES	Medium	3.Mixed forest	4
132	Young	Man	Urban	YES	Medium	3.Mixed forest	4
197	MiddleAged	Man	Rural	YES	Medium	3.Mixed forest	4
198	MiddleAged	Man	Urban	YES	Medium	3.Mixed forest	4
249	MiddleAged	Man	Urban	YES	Medium	3.Mixed forest	4
252	Senior	Woman	Urban	YES	Medium	3.Mixed forest	4
296	Senior	Woman	Rural	YES	Medium	3.Mixed forest	4
302	MiddleAged	Woman	Urban	YES	Medium	3.Mixed forest	4
306	Senior	Man	Rural	YES	Medium	3.Mixed forest	4
335	MiddleAged	Woman	Rural	YES	Medium	3.Mixed forest	4
3	MiddleAged	Man	Urban	YES	Medium	3.Mixed forest	3
9	Young	Woman	Urban	YES	Medium	3.Mixed forest	3
11	MiddleAged	Man	Urban	YES	Medium	3.Mixed forest	3
14	MiddleAged	Woman	Urban	YES	Medium	3.Mixed forest	3
18	Young	Man	Urban	YES	Medium	3.Mixed forest	3
23	MiddleAged	Man	Urban	YES	Medium	3.Mixed forest	3
24	MiddleAged	Woman	Urban	YES	Medium	3.Mixed forest	3
28	Young	Man	Rural	YES	Medium	3.Mixed forest	3
35	MiddleAged	Woman	Urban	YES	Medium	3.Mixed forest	3
36	MiddleAged	Woman	Urban	YES	Medium	3.Mixed forest	3
42	MiddleAged	Man	Urban	YES	Medium	3.Mixed forest	3
46	MiddleAged	Woman	Urban	YES	Medium	3.Mixed forest	3
73	MiddleAged	Man	Urban	YES	Medium	3.Mixed forest	3
74	MiddleAged	Woman	Urban	YES	Medium	3.Mixed forest	3
82	MiddleAged	Man	Urban	YES	Medium	3.Mixed forest	3
102	Senior	Woman	Urban	YES	Medium	3.Mixed forest	3
103	Young	Woman	Urban	YES	Medium	3.Mixed forest	3
105	Senior	Woman	Rural	YES	Medium	3.Mixed forest	3
111	MiddleAged	Woman	Rural	YES	Medium	3.Mixed forest	3
123	Young	Man	Urban	YES	Medium	3.Mixed forest	3
126	MiddleAged	Man	Urban	YES	Medium	3.Mixed forest	3
134	MiddleAged	Woman	Urban	YES	Medium	3.Mixed forest	3
135	Senior	Man	Urban	YES	Medium	3.Mixed forest	3
138	Senior	Woman	Rural	YES	Medium	3.Mixed forest	3
155	MiddleAged	Man	Urban	YES	Medium	3.Mixed forest	3
157	MiddleAged	Woman	Urban	YES	Medium	3.Mixed forest	3
170	MiddleAged	Woman	Urban	YES	Medium	3.Mixed forest	3
172	MiddleAged	Woman	Urban	YES	Medium	3.Mixed forest	3
186	MiddleAged	Woman	Rural	YES	Medium	3.Mixed forest	3
188	MiddleAged	Man	Urban	YES	Medium	3.Mixed forest	3
191	MiddleAged	Woman	Urban	YES	Medium	3.Mixed forest	3
192	Young	Man	Urban	YES	Medium	3.Mixed forest	3
199	Young	Woman	Rural	YES	Medium	3.Mixed forest	3
201	Senior	Woman	Urban	YES	Medium	3.Mixed forest	3
209	Senior	Man	Rural	YES	Medium	3.Mixed forest	3
217	MiddleAged	Man	Urban	YES	Medium	3.Mixed forest	3
218	MiddleAged	Woman	Rural	YES	Medium	3.Mixed forest	3
220	Senior	Woman	Rural	YES	Medium	3.Mixed forest	3
227	Senior	Woman	Rural	YES	Medium	3.Mixed forest	3
245	MiddleAged	Woman	Urban	YES	Medium	3.Mixed forest	3
255	MiddleAged	Man	Urban	YES	Medium	3.Mixed forest	3
279	Young	Woman	Urban	YES	Medium	3.Mixed forest	3
283	Young	Woman	Urban	YES	Medium	3.Mixed forest	3
285	MiddleAged	Woman	Rural	YES	Medium	3.Mixed forest	3
295	Senior	Woman	Urban	YES	Medium	3.Mixed forest	3
297	MiddleAged	Man	Urban	YES	Medium	3.Mixed forest	3
309	MiddleAged	Man	Rural	YES	Medium	3.Mixed forest	3
310	MiddleAged	Woman	Rural	YES	Medium	3.Mixed forest	3
318	MiddleAged	Woman	Urban	YES	Medium	3.Mixed forest	3
320	MiddleAged	Woman	Rural	YES	Medium	3.Mixed forest	3
328	MiddleAged	Woman	Urban	YES	Medium	3.Mixed forest	3
336	MiddleAged	Woman	Urban	YES	Medium	3.Mixed forest	3
343	Senior	Woman	Rural	YES	Medium	3.Mixed forest	3
130	Young	Woman	Urban	YES	Medium	3.Mixed forest	2
140	MiddleAged	Man	Rural	YES	Medium	3.Mixed forest	2
161	MiddleAged	Woman	Rural	YES	Medium	3.Mixed forest	2
203	Senior	Man	Rural	YES	Medium	3.Mixed forest	2
204	MiddleAged	Woman	Rural	YES	Medium	3.Mixed forest	2
226	Young	Man	Urban	YES	Medium	3.Mixed forest	2
232	Young	Man	Urban	YES	Medium	3.Mixed forest	2
277	Senior	Man	Rural	YES	Medium	3.Mixed forest	2
280	Young	Woman	Urban	YES	Medium	3.Mixed forest	2
290	Young	Man	Urban	YES	Medium	3.Mixed forest	2
311	Young	Woman	Rural	YES	Medium	3.Mixed forest	2
305	MiddleAged	Woman	Rural	YES	Medium	3.Mixed forest	1
17	Senior	Woman	Rural	NO	Medium	3.Shrubland	4
25	MiddleAged	Man	Urban	NO	Medium	3.Shrubland	4
32	Senior	Woman	Rural	NO	Medium	3.Shrubland	4
43	MiddleAged	Man	Rural	NO	Medium	3.Shrubland	4
68	MiddleAged	Woman	Urban	NO	Medium	3.Shrubland	4
70	MiddleAged	Woman	Urban	NO	Medium	3.Shrubland	4
75	Young	Woman	Urban	NO	Medium	3.Shrubland	4
76	MiddleAged	Woman	Urban	NO	Medium	3.Shrubland	4
78	MiddleAged	Woman	Urban	NO	Medium	3.Shrubland	4
79	MiddleAged	Man	Urban	NO	Medium	3.Shrubland	4
89	Young	Woman	Rural	NO	Medium	3.Shrubland	4
95	Young	Woman	Urban	NO	Medium	3.Shrubland	4
98	Young	Man	Urban	NO	Medium	3.Shrubland	4
113	Senior	Woman	Urban	NO	Medium	3.Shrubland	4
114	Young	Woman	Urban	NO	Medium	3.Shrubland	4
119	MiddleAged	Woman	Urban	NO	Medium	3.Shrubland	4
151	MiddleAged	Woman	Urban	NO	Medium	3.Shrubland	4
162	MiddleAged	Woman	Urban	NO	Medium	3.Shrubland	4
168	MiddleAged	Woman	Urban	NO	Medium	3.Shrubland	4
177	MiddleAged	Man	Urban	NO	Medium	3.Shrubland	4
182	MiddleAged	Man	Urban	NO	Medium	3.Shrubland	4
206	MiddleAged	Woman	Urban	NO	Medium	3.Shrubland	4
212	MiddleAged	Woman	Urban	NO	Medium	3.Shrubland	4
214	MiddleAged	Man	Urban	NO	Medium	3.Shrubland	4
216	MiddleAged	Woman	Urban	NO	Medium	3.Shrubland	4
246	Senior	Woman	Rural	NO	Medium	3.Shrubland	4
250	MiddleAged	Man	Urban	NO	Medium	3.Shrubland	4
257	MiddleAged	Woman	Urban	NO	Medium	3.Shrubland	4
264	MiddleAged	Man	Urban	NO	Medium	3.Shrubland	4
270	Young	Woman	Urban	NO	Medium	3.Shrubland	4
274	MiddleAged	Man	Urban	NO	Medium	3.Shrubland	4
284	MiddleAged	Woman	Urban	NO	Medium	3.Shrubland	4
291	MiddleAged	Man	Urban	NO	Medium	3.Shrubland	4
298	Young	Man	Urban	NO	Medium	3.Shrubland	4
313	MiddleAged	Man	Urban	NO	Medium	3.Shrubland	4
330	MiddleAged	Woman	Urban	NO	Medium	3.Shrubland	4
337	MiddleAged	Woman	Urban	NO	Medium	3.Shrubland	4
340	MiddleAged	Woman	Urban	NO	Medium	3.Shrubland	4
344	MiddleAged	Woman	Urban	NO	Medium	3.Shrubland	4
1	MiddleAged	Woman	Urban	NO	Medium	3.Shrubland	3
31	MiddleAged	Woman	Urban	NO	Medium	3.Shrubland	3
37	MiddleAged	Man	Urban	NO	Medium	3.Shrubland	3
49	Senior	Woman	Urban	NO	Medium	3.Shrubland	3
54	MiddleAged	Woman	Urban	NO	Medium	3.Shrubland	3
55	MiddleAged	Man	Urban	NO	Medium	3.Shrubland	3
84	Senior	Man	Urban	NO	Medium	3.Shrubland	3
90	MiddleAged	Woman	Urban	NO	Medium	3.Shrubland	3
96	MiddleAged	Woman	Urban	NO	Medium	3.Shrubland	3
100	MiddleAged	Man	Urban	NO	Medium	3.Shrubland	3
101	Senior	Man	Rural	NO	Medium	3.Shrubland	3
106	MiddleAged	Man	Urban	NO	Medium	3.Shrubland	3
124	MiddleAged	Woman	Urban	NO	Medium	3.Shrubland	3
139	Senior	Man	Urban	NO	Medium	3.Shrubland	3
143	MiddleAged	Man	Urban	NO	Medium	3.Shrubland	3
146	MiddleAged	Woman	Urban	NO	Medium	3.Shrubland	3
149	MiddleAged	Woman	Urban	NO	Medium	3.Shrubland	3
160	MiddleAged	Man	Urban	NO	Medium	3.Shrubland	3
163	Senior	Woman	Urban	NO	Medium	3.Shrubland	3
181	Senior	Man	Urban	NO	Medium	3.Shrubland	3
195	MiddleAged	Woman	Urban	NO	Medium	3.Shrubland	3
205	Young	Man	Urban	NO	Medium	3.Shrubland	3
223	MiddleAged	Man	Urban	NO	Medium	3.Shrubland	3
230	MiddleAged	Woman	Urban	NO	Medium	3.Shrubland	3
236	MiddleAged	Man	Urban	NO	Medium	3.Shrubland	3
239	MiddleAged	Man	Urban	NO	Medium	3.Shrubland	3
251	MiddleAged	Woman	Urban	NO	Medium	3.Shrubland	3
254	MiddleAged	Woman	Urban	NO	Medium	3.Shrubland	3
267	MiddleAged	Man	Urban	NO	Medium	3.Shrubland	3
301	MiddleAged	Man	Urban	NO	Medium	3.Shrubland	3
315	MiddleAged	Man	Urban	NO	Medium	3.Shrubland	3
317	Senior	Woman	Urban	NO	Medium	3.Shrubland	3
321	Senior	Man	Urban	NO	Medium	3.Shrubland	3
322	Senior	Woman	Rural	NO	Medium	3.Shrubland	3
333	MiddleAged	Woman	Urban	NO	Medium	3.Shrubland	3
39	MiddleAged	Man	Rural	NO	Medium	3.Shrubland	2
57	MiddleAged	Man	Rural	NO	Medium	3.Shrubland	2
60	Senior	Woman	Urban	NO	Medium	3.Shrubland	2
65	MiddleAged	Woman	Urban	NO	Medium	3.Shrubland	2
117	MiddleAged	Man	Urban	NO	Medium	3.Shrubland	2
121	MiddleAged	Woman	Urban	NO	Medium	3.Shrubland	2
159	MiddleAged	Woman	Urban	NO	Medium	3.Shrubland	2
169	MiddleAged	Woman	Urban	NO	Medium	3.Shrubland	2
175	MiddleAged	Woman	Urban	NO	Medium	3.Shrubland	2
187	Senior	Woman	Urban	NO	Medium	3.Shrubland	2
237	MiddleAged	Woman	Urban	NO	Medium	3.Shrubland	2
244	Young	Man	Urban	NO	Medium	3.Shrubland	2
325	MiddleAged	Man	Urban	NO	Medium	3.Shrubland	2
184	MiddleAged	Man	Urban	NO	Medium	3.Shrubland	1
20	MiddleAged	Woman	Urban	NO	Medium	3.Shrubland	4
48	MiddleAged	Man	Rural	NO	Medium	3.Shrubland	1
6	Young	Woman	Urban	YES	Medium	3.Shrubland	4
9	Young	Woman	Urban	YES	Medium	3.Shrubland	4
23	MiddleAged	Man	Urban	YES	Medium	3.Shrubland	4
24	MiddleAged	Woman	Urban	YES	Medium	3.Shrubland	4
103	Young	Woman	Urban	YES	Medium	3.Shrubland	4
123	Young	Man	Urban	YES	Medium	3.Shrubland	4
130	Young	Woman	Urban	YES	Medium	3.Shrubland	4
132	Young	Man	Urban	YES	Medium	3.Shrubland	4
138	Senior	Woman	Rural	YES	Medium	3.Shrubland	4
155	MiddleAged	Man	Urban	YES	Medium	3.Shrubland	4
191	MiddleAged	Woman	Urban	YES	Medium	3.Shrubland	4
198	MiddleAged	Man	Urban	YES	Medium	3.Shrubland	4
204	MiddleAged	Woman	Rural	YES	Medium	3.Shrubland	4
220	Senior	Woman	Rural	YES	Medium	3.Shrubland	4
227	Senior	Woman	Rural	YES	Medium	3.Shrubland	4
280	Young	Woman	Urban	YES	Medium	3.Shrubland	4
290	Young	Man	Urban	YES	Medium	3.Shrubland	4
296	Senior	Woman	Rural	YES	Medium	3.Shrubland	4
302	MiddleAged	Woman	Urban	YES	Medium	3.Shrubland	4
309	MiddleAged	Man	Rural	YES	Medium	3.Shrubland	4
311	Young	Woman	Rural	YES	Medium	3.Shrubland	4
320	MiddleAged	Woman	Rural	YES	Medium	3.Shrubland	4
335	MiddleAged	Woman	Rural	YES	Medium	3.Shrubland	4
336	MiddleAged	Woman	Urban	YES	Medium	3.Shrubland	4
3	MiddleAged	Man	Urban	YES	Medium	3.Shrubland	3
14	MiddleAged	Woman	Urban	YES	Medium	3.Shrubland	3
15	MiddleAged	Woman	Urban	YES	Medium	3.Shrubland	3
28	Young	Man	Rural	YES	Medium	3.Shrubland	3
35	MiddleAged	Woman	Urban	YES	Medium	3.Shrubland	3
42	MiddleAged	Man	Urban	YES	Medium	3.Shrubland	3
46	MiddleAged	Woman	Urban	YES	Medium	3.Shrubland	3
74	MiddleAged	Woman	Urban	YES	Medium	3.Shrubland	3
92	MiddleAged	Man	Urban	YES	Medium	3.Shrubland	3
105	Senior	Woman	Rural	YES	Medium	3.Shrubland	3
111	MiddleAged	Woman	Rural	YES	Medium	3.Shrubland	3
127	Senior	Woman	Rural	YES	Medium	3.Shrubland	3
134	MiddleAged	Woman	Urban	YES	Medium	3.Shrubland	3
135	Senior	Man	Urban	YES	Medium	3.Shrubland	3
140	MiddleAged	Man	Rural	YES	Medium	3.Shrubland	3
157	MiddleAged	Woman	Urban	YES	Medium	3.Shrubland	3
161	MiddleAged	Woman	Rural	YES	Medium	3.Shrubland	3
170	MiddleAged	Woman	Urban	YES	Medium	3.Shrubland	3
186	MiddleAged	Woman	Rural	YES	Medium	3.Shrubland	3
192	Young	Man	Urban	YES	Medium	3.Shrubland	3
199	Young	Woman	Rural	YES	Medium	3.Shrubland	3
201	Senior	Woman	Urban	YES	Medium	3.Shrubland	3
203	Senior	Man	Rural	YES	Medium	3.Shrubland	3
217	MiddleAged	Man	Urban	YES	Medium	3.Shrubland	3
218	MiddleAged	Woman	Rural	YES	Medium	3.Shrubland	3
226	Young	Man	Urban	YES	Medium	3.Shrubland	3
252	Senior	Woman	Urban	YES	Medium	3.Shrubland	3
255	MiddleAged	Man	Urban	YES	Medium	3.Shrubland	3
277	Senior	Man	Rural	YES	Medium	3.Shrubland	3
279	Young	Woman	Urban	YES	Medium	3.Shrubland	3
283	Young	Woman	Urban	YES	Medium	3.Shrubland	3
295	Senior	Woman	Urban	YES	Medium	3.Shrubland	3
297	MiddleAged	Man	Urban	YES	Medium	3.Shrubland	3
328	MiddleAged	Woman	Urban	YES	Medium	3.Shrubland	3
11	MiddleAged	Man	Urban	YES	Medium	3.Shrubland	2
18	Young	Man	Urban	YES	Medium	3.Shrubland	2
36	MiddleAged	Woman	Urban	YES	Medium	3.Shrubland	2
47	Young	Man	Urban	YES	Medium	3.Shrubland	2
64	MiddleAged	Woman	Rural	YES	Medium	3.Shrubland	2
73	MiddleAged	Man	Urban	YES	Medium	3.Shrubland	2
82	MiddleAged	Man	Urban	YES	Medium	3.Shrubland	2
102	Senior	Woman	Urban	YES	Medium	3.Shrubland	2
126	MiddleAged	Man	Urban	YES	Medium	3.Shrubland	2
172	MiddleAged	Woman	Urban	YES	Medium	3.Shrubland	2
188	MiddleAged	Man	Urban	YES	Medium	3.Shrubland	2
197	MiddleAged	Man	Rural	YES	Medium	3.Shrubland	2
209	Senior	Man	Rural	YES	Medium	3.Shrubland	2
245	MiddleAged	Woman	Urban	YES	Medium	3.Shrubland	2
249	MiddleAged	Man	Urban	YES	Medium	3.Shrubland	2
285	MiddleAged	Woman	Rural	YES	Medium	3.Shrubland	2
306	Senior	Man	Rural	YES	Medium	3.Shrubland	2
318	MiddleAged	Woman	Urban	YES	Medium	3.Shrubland	2
343	Senior	Woman	Rural	YES	Medium	3.Shrubland	2
232	Young	Man	Urban	YES	Medium	3.Shrubland	1
305	MiddleAged	Woman	Rural	YES	Medium	3.Shrubland	1
310	MiddleAged	Woman	Rural	YES	Medium	3.Shrubland	1
1	MiddleAged	Woman	Urban	NO	Medium	3.Pine Pl.	4
54	MiddleAged	Woman	Urban	NO	Medium	3.Pine Pl.	4
55	MiddleAged	Man	Urban	NO	Medium	3.Pine Pl.	4
57	MiddleAged	Man	Rural	NO	Medium	3.Pine Pl.	4
84	Senior	Man	Urban	NO	Medium	3.Pine Pl.	4
89	Young	Woman	Rural	NO	Medium	3.Pine Pl.	4
90	MiddleAged	Woman	Urban	NO	Medium	3.Pine Pl.	4
96	MiddleAged	Woman	Urban	NO	Medium	3.Pine Pl.	4
100	MiddleAged	Man	Urban	NO	Medium	3.Pine Pl.	4
101	Senior	Man	Rural	NO	Medium	3.Pine Pl.	4
113	Senior	Woman	Urban	NO	Medium	3.Pine Pl.	4
114	Young	Woman	Urban	NO	Medium	3.Pine Pl.	4
124	MiddleAged	Woman	Urban	NO	Medium	3.Pine Pl.	4
146	MiddleAged	Woman	Urban	NO	Medium	3.Pine Pl.	4
149	MiddleAged	Woman	Urban	NO	Medium	3.Pine Pl.	4
151	MiddleAged	Woman	Urban	NO	Medium	3.Pine Pl.	4
160	MiddleAged	Man	Urban	NO	Medium	3.Pine Pl.	4
163	Senior	Woman	Urban	NO	Medium	3.Pine Pl.	4
168	MiddleAged	Woman	Urban	NO	Medium	3.Pine Pl.	4
195	MiddleAged	Woman	Urban	NO	Medium	3.Pine Pl.	4
205	Young	Man	Urban	NO	Medium	3.Pine Pl.	4
223	MiddleAged	Man	Urban	NO	Medium	3.Pine Pl.	4
230	MiddleAged	Woman	Urban	NO	Medium	3.Pine Pl.	4
239	MiddleAged	Man	Urban	NO	Medium	3.Pine Pl.	4
244	Young	Man	Urban	NO	Medium	3.Pine Pl.	4
251	MiddleAged	Woman	Urban	NO	Medium	3.Pine Pl.	4
254	MiddleAged	Woman	Urban	NO	Medium	3.Pine Pl.	4
264	MiddleAged	Man	Urban	NO	Medium	3.Pine Pl.	4
267	MiddleAged	Man	Urban	NO	Medium	3.Pine Pl.	4
291	MiddleAged	Man	Urban	NO	Medium	3.Pine Pl.	4
313	MiddleAged	Man	Urban	NO	Medium	3.Pine Pl.	4
315	MiddleAged	Man	Urban	NO	Medium	3.Pine Pl.	4
317	Senior	Woman	Urban	NO	Medium	3.Pine Pl.	4
321	Senior	Man	Urban	NO	Medium	3.Pine Pl.	4
322	Senior	Woman	Rural	NO	Medium	3.Pine Pl.	4
340	MiddleAged	Woman	Urban	NO	Medium	3.Pine Pl.	4
17	Senior	Woman	Rural	NO	Medium	3.Pine Pl.	3
25	MiddleAged	Man	Urban	NO	Medium	3.Pine Pl.	3
31	MiddleAged	Woman	Urban	NO	Medium	3.Pine Pl.	3
32	Senior	Woman	Rural	NO	Medium	3.Pine Pl.	3
37	MiddleAged	Man	Urban	NO	Medium	3.Pine Pl.	3
39	MiddleAged	Man	Rural	NO	Medium	3.Pine Pl.	3
43	MiddleAged	Man	Rural	NO	Medium	3.Pine Pl.	3
49	Senior	Woman	Urban	NO	Medium	3.Pine Pl.	3
60	Senior	Woman	Urban	NO	Medium	3.Pine Pl.	3
65	MiddleAged	Woman	Urban	NO	Medium	3.Pine Pl.	3
68	MiddleAged	Woman	Urban	NO	Medium	3.Pine Pl.	3
70	MiddleAged	Woman	Urban	NO	Medium	3.Pine Pl.	3
75	Young	Woman	Urban	NO	Medium	3.Pine Pl.	3
76	MiddleAged	Woman	Urban	NO	Medium	3.Pine Pl.	3
78	MiddleAged	Woman	Urban	NO	Medium	3.Pine Pl.	3
79	MiddleAged	Man	Urban	NO	Medium	3.Pine Pl.	3
95	Young	Woman	Urban	NO	Medium	3.Pine Pl.	3
98	Young	Man	Urban	NO	Medium	3.Pine Pl.	3
117	MiddleAged	Man	Urban	NO	Medium	3.Pine Pl.	3
119	MiddleAged	Woman	Urban	NO	Medium	3.Pine Pl.	3
121	MiddleAged	Woman	Urban	NO	Medium	3.Pine Pl.	3
139	Senior	Man	Urban	NO	Medium	3.Pine Pl.	3
143	MiddleAged	Man	Urban	NO	Medium	3.Pine Pl.	3
159	MiddleAged	Woman	Urban	NO	Medium	3.Pine Pl.	3
162	MiddleAged	Woman	Urban	NO	Medium	3.Pine Pl.	3
169	MiddleAged	Woman	Urban	NO	Medium	3.Pine Pl.	3
175	MiddleAged	Woman	Urban	NO	Medium	3.Pine Pl.	3
177	MiddleAged	Man	Urban	NO	Medium	3.Pine Pl.	3
182	MiddleAged	Man	Urban	NO	Medium	3.Pine Pl.	3
184	MiddleAged	Man	Urban	NO	Medium	3.Pine Pl.	3
187	Senior	Woman	Urban	NO	Medium	3.Pine Pl.	3
206	MiddleAged	Woman	Urban	NO	Medium	3.Pine Pl.	3
212	MiddleAged	Woman	Urban	NO	Medium	3.Pine Pl.	3
214	MiddleAged	Man	Urban	NO	Medium	3.Pine Pl.	3
216	MiddleAged	Woman	Urban	NO	Medium	3.Pine Pl.	3
236	MiddleAged	Man	Urban	NO	Medium	3.Pine Pl.	3
237	MiddleAged	Woman	Urban	NO	Medium	3.Pine Pl.	3
246	Senior	Woman	Rural	NO	Medium	3.Pine Pl.	3
250	MiddleAged	Man	Urban	NO	Medium	3.Pine Pl.	3
257	MiddleAged	Woman	Urban	NO	Medium	3.Pine Pl.	3
270	Young	Woman	Urban	NO	Medium	3.Pine Pl.	3
274	MiddleAged	Man	Urban	NO	Medium	3.Pine Pl.	3
284	MiddleAged	Woman	Urban	NO	Medium	3.Pine Pl.	3
298	Young	Man	Urban	NO	Medium	3.Pine Pl.	3
325	MiddleAged	Man	Urban	NO	Medium	3.Pine Pl.	3
330	MiddleAged	Woman	Urban	NO	Medium	3.Pine Pl.	3
333	MiddleAged	Woman	Urban	NO	Medium	3.Pine Pl.	3
337	MiddleAged	Woman	Urban	NO	Medium	3.Pine Pl.	3
344	MiddleAged	Woman	Urban	NO	Medium	3.Pine Pl.	3
106	MiddleAged	Man	Urban	NO	Medium	3.Pine Pl.	2
181	Senior	Man	Urban	NO	Medium	3.Pine Pl.	2
301	MiddleAged	Man	Urban	NO	Medium	3.Pine Pl.	2
48	MiddleAged	Man	Rural	NO	Medium	3.Pine Pl.	4
20	MiddleAged	Woman	Urban	NO	Medium	3.Pine Pl.	3
3	MiddleAged	Man	Urban	YES	Medium	3.Pine Pl.	4
6	Young	Woman	Urban	YES	Medium	3.Pine Pl.	4
15	MiddleAged	Woman	Urban	YES	Medium	3.Pine Pl.	4
35	MiddleAged	Woman	Urban	YES	Medium	3.Pine Pl.	4
46	MiddleAged	Woman	Urban	YES	Medium	3.Pine Pl.	4
74	MiddleAged	Woman	Urban	YES	Medium	3.Pine Pl.	4
92	MiddleAged	Man	Urban	YES	Medium	3.Pine Pl.	4
102	Senior	Woman	Urban	YES	Medium	3.Pine Pl.	4
105	Senior	Woman	Rural	YES	Medium	3.Pine Pl.	4
[truncated: 71 more rows]

## Sheet: Question 4
Survey Number	Age	SEX	Residence	Outdoor Activities	Educational level	Vegetation Type	Score
40	Young	Woman	Urban	YES	High	3.Agricult	3
104	MiddleAged	Man	Urban	YES	High	3.Agricult	3
129	MiddleAged	Man	Urban	NO	High	3.Agricult	3
141	MiddleAged	Woman	Urban	NO	High	3.Agricult	3
145	Young	Woman	Urban	YES	High	3.Agricult	3
156	Young	Man	Urban	YES	High	3.Agricult	3
196	MiddleAged	Woman	Urban	YES	High	3.Agricult	3
300	MiddleAged	Woman	Urban	YES	High	3.Agricult	3
21	MiddleAged	Man	Urban	NO	High	3.Agricult	2
38	Young	Woman	Urban	YES	High	3.Agricult	2
41	Young	Woman	Urban	YES	High	3.Agricult	2
63	MiddleAged	Man	Urban	YES	High	3.Agricult	2
66	MiddleAged	Woman	Urban	NO	High	3.Agricult	2
83	Young	Woman	Urban	YES	High	3.Agricult	2
85	Young	Woman	Urban	YES	High	3.Agricult	2
97	Young	Woman	Urban	YES	High	3.Agricult	2
110	MiddleAged	Woman	Urban	YES	High	3.Agricult	2
128	MiddleAged	Man	Urban	NO	High	3.Agricult	2
142	Young	Woman	Urban	NO	High	3.Agricult	2
147	MiddleAged	Man	Urban	NO	High	3.Agricult	2
167	Young	Man	Urban	NO	High	3.Agricult	2
185	Young	Man	Urban	NO	High	3.Agricult	2
190	Young	Woman	Urban	YES	High	3.Agricult	2
202	Young	Woman	Urban	YES	High	3.Agricult	2
208	MiddleAged	Man	Urban	YES	High	3.Agricult	2
210	MiddleAged	Man	Urban	YES	High	3.Agricult	2
221	MiddleAged	Woman	Urban	YES	High	3.Agricult	2
222	MiddleAged	Woman	Urban	NO	High	3.Agricult	2
225	Young	Man	Urban	YES	High	3.Agricult	2
231	Young	Woman	Urban	YES	High	3.Agricult	2
234	Young	Woman	Urban	YES	High	3.Agricult	2
235	Young	Woman	Urban	NO	High	3.Agricult	2
243	Young	Man	Urban	YES	High	3.Agricult	2
247	MiddleAged	Woman	Urban	NO	High	3.Agricult	2
259	Young	Man	Urban	YES	High	3.Agricult	2
261	Young	Woman	Urban	NO	High	3.Agricult	2
268	Young	Woman	Urban	YES	High	3.Agricult	2
269	Senior	Woman	Urban	YES	High	3.Agricult	2
272	Senior	Woman	Urban	YES	High	3.Agricult	2
273	Young	Woman	Urban	NO	High	3.Agricult	2
282	Young	Man	Urban	YES	High	3.Agricult	2
288	Young	Woman	Urban	NO	High	3.Agricult	2
316	Young	Man	Urban	YES	High	3.Agricult	2
332	Young	Man	Urban	YES	High	3.Agricult	2
338	Young	Man	Urban	YES	High	3.Agricult	2
341	Young	Woman	Urban	YES	High	3.Agricult	2
342	Young	Man	Urban	YES	High	3.Agricult	2
345	MiddleAged	Woman	Urban	YES	High	3.Agricult	2
10	Young	Man	Urban	YES	High	3.Agricult	1
16	Young	Woman	Urban	YES	High	3.Agricult	1
27	Young	Man	Urban	YES	High	3.Agricult	1
72	Young	Man	Urban	NO	High	3.Agricult	1
86	Senior	Man	Urban	NO	High	3.Agricult	1
88	MiddleAged	Woman	Urban	YES	High	3.Agricult	1
108	Young	Man	Urban	YES	High	3.Agricult	1
115	MiddleAged	Woman	Urban	NO	High	3.Agricult	1
116	Young	Man	Urban	YES	High	3.Agricult	1
118	MiddleAged	Man	Urban	NO	High	3.Agricult	1
125	Young	Woman	Urban	YES	High	3.Agricult	1
136	Young	Woman	Urban	YES	High	3.Agricult	1
137	MiddleAged	Woman	Urban	YES	High	3.Agricult	1
150	MiddleAged	Woman	Urban	NO	High	3.Agricult	1
152	Young	Man	Urban	YES	High	3.Agricult	1
179	Young	Woman	Urban	YES	High	3.Agricult	1
189	MiddleAged	Man	Urban	YES	High	3.Agricult	1
211	MiddleAged	Woman	Urban	YES	High	3.Agricult	1
238	MiddleAged	Woman	Urban	NO	High	3.Agricult	1
248	Young	Woman	Urban	YES	High	3.Agricult	1
278	Young	Woman	Urban	YES	High	3.Agricult	1
299	MiddleAged	Man	Urban	YES	High	3.Agricult	1
308	Young	Man	Urban	YES	High	3.Agricult	1
314	MiddleAged	Man	Urban	YES	High	3.Agricult	1
324	Young	Man	Urban	NO	High	3.Agricult	1
4	MiddleAged	Man	Rural	YES	High	3.Agricult	3
53	Senior	Woman	Rural	YES	High	3.Agricult	3
107	MiddleAged	Man	Rural	YES	High	3.Agricult	3
144	MiddleAged	Man	Rural	YES	High	3.Agricult	3
331	Young	Woman	Rural	YES	High	3.Agricult	3
19	Young	Woman	Rural	YES	High	3.Agricult	2
29	Young	Woman	Rural	YES	High	3.Agricult	2
56	Young	Man	Rural	YES	High	3.Agricult	2
10	Young	Man	Urban	YES	High	3.OakForest	3
21	MiddleAged	Man	Urban	NO	High	3.OakForest	3
38	Young	Woman	Urban	YES	High	3.OakForest	3
41	Young	Woman	Urban	YES	High	3.OakForest	3
63	MiddleAged	Man	Urban	YES	High	3.OakForest	3
66	MiddleAged	Woman	Urban	NO	High	3.OakForest	3
72	Young	Man	Urban	NO	High	3.OakForest	3
83	Young	Woman	Urban	YES	High	3.OakForest	3
85	Young	Woman	Urban	YES	High	3.OakForest	3
86	Senior	Man	Urban	NO	High	3.OakForest	3
88	MiddleAged	Woman	Urban	YES	High	3.OakForest	3
97	Young	Woman	Urban	YES	High	3.OakForest	3
104	MiddleAged	Man	Urban	YES	High	3.OakForest	3
108	Young	Man	Urban	YES	High	3.OakForest	3
110	MiddleAged	Woman	Urban	YES	High	3.OakForest	3
115	MiddleAged	Woman	Urban	NO	High	3.OakForest	3
116	Young	Man	Urban	YES	High	3.OakForest	3
125	Young	Woman	Urban	YES	High	3.OakForest	3
128	MiddleAged	Man	Urban	NO	High	3.OakForest	3
129	MiddleAged	Man	Urban	NO	High	3.OakForest	3
136	Young	Woman	Urban	YES	High	3.OakForest	3
137	MiddleAged	Woman	Urban	YES	High	3.OakForest	3
141	MiddleAged	Woman	Urban	NO	High	3.OakForest	3
142	Young	Woman	Urban	NO	High	3.OakForest	3
145	Young	Woman	Urban	YES	High	3.OakForest	3
147	MiddleAged	Man	Urban	NO	High	3.OakForest	3
156	Young	Man	Urban	YES	High	3.OakForest	3
167	Young	Man	Urban	NO	High	3.OakForest	3
179	Young	Woman	Urban	YES	High	3.OakForest	3
185	Young	Man	Urban	NO	High	3.OakForest	3
189	MiddleAged	Man	Urban	YES	High	3.OakForest	3
190	Young	Woman	Urban	YES	High	3.OakForest	3
196	MiddleAged	Woman	Urban	YES	High	3.OakForest	3
202	Young	Woman	Urban	YES	High	3.OakForest	3
208	MiddleAged	Man	Urban	YES	High	3.OakForest	3
210	MiddleAged	Man	Urban	YES	High	3.OakForest	3
211	MiddleAged	Woman	Urban	YES	High	3.OakForest	3
221	MiddleAged	Woman	Urban	YES	High	3.OakForest	3
222	MiddleAged	Woman	Urban	NO	High	3.OakForest	3
225	Young	Man	Urban	YES	High	3.OakForest	3
231	Young	Woman	Urban	YES	High	3.OakForest	3
234	Young	Woman	Urban	YES	High	3.OakForest	3
235	Young	Woman	Urban	NO	High	3.OakForest	3
238	MiddleAged	Woman	Urban	NO	High	3.OakForest	3
243	Young	Man	Urban	YES	High	3.OakForest	3
247	MiddleAged	Woman	Urban	NO	High	3.OakForest	3
248	Young	Woman	Urban	YES	High	3.OakForest	3
259	Young	Man	Urban	YES	High	3.OakForest	3
261	Young	Woman	Urban	NO	High	3.OakForest	3
268	Young	Woman	Urban	YES	High	3.OakForest	3
269	Senior	Woman	Urban	YES	High	3.OakForest	3
272	Senior	Woman	Urban	YES	High	3.OakForest	3
273	Young	Woman	Urban	NO	High	3.OakForest	3
282	Young	Man	Urban	YES	High	3.OakForest	3
288	Young	Woman	Urban	NO	High	3.OakForest	3
299	MiddleAged	Man	Urban	YES	High	3.OakForest	3
300	MiddleAged	Woman	Urban	YES	High	3.OakForest	3
308	Young	Man	Urban	YES	High	3.OakForest	3
314	MiddleAged	Man	Urban	YES	High	3.OakForest	3
316	Young	Man	Urban	YES	High	3.OakForest	3
324	Young	Man	Urban	NO	High	3.OakForest	3
332	Young	Man	Urban	YES	High	3.OakForest	3
338	Young	Man	Urban	YES	High	3.OakForest	3
341	Young	Woman	Urban	YES	High	3.OakForest	3
342	Young	Man	Urban	YES	High	3.OakForest	3
345	MiddleAged	Woman	Urban	YES	High	3.OakForest	3
16	Young	Woman	Urban	YES	High	3.OakForest	2
27	Young	Man	Urban	YES	High	3.OakForest	2
40	Young	Woman	Urban	YES	High	3.OakForest	2
118	MiddleAged	Man	Urban	NO	High	3.OakForest	2
150	MiddleAged	Woman	Urban	NO	High	3.OakForest	2
152	Young	Man	Urban	YES	High	3.OakForest	2
278	Young	Woman	Urban	YES	High	3.OakForest	2
4	MiddleAged	Man	Rural	YES	High	3.OakForest	3
19	Young	Woman	Rural	YES	High	3.OakForest	3
29	Young	Woman	Rural	YES	High	3.OakForest	3
53	Senior	Woman	Rural	YES	High	3.OakForest	3
56	Young	Man	Rural	YES	High	3.OakForest	3
107	MiddleAged	Man	Rural	YES	High	3.OakForest	3
144	MiddleAged	Man	Rural	YES	High	3.OakForest	3
331	Young	Woman	Rural	YES	High	3.OakForest	3
10	Young	Man	Urban	YES	High	3.Eucalypt Pl.	3
40	Young	Woman	Urban	YES	High	3.Eucalypt Pl.	3
128	MiddleAged	Man	Urban	NO	High	3.Eucalypt Pl.	3
137	MiddleAged	Woman	Urban	YES	High	3.Eucalypt Pl.	3
141	MiddleAged	Woman	Urban	NO	High	3.Eucalypt Pl.	3
156	Young	Man	Urban	YES	High	3.Eucalypt Pl.	3
185	Young	Man	Urban	NO	High	3.Eucalypt Pl.	3
221	MiddleAged	Woman	Urban	YES	High	3.Eucalypt Pl.	3
272	Senior	Woman	Urban	YES	High	3.Eucalypt Pl.	3
273	Young	Woman	Urban	NO	High	3.Eucalypt Pl.	3
299	MiddleAged	Man	Urban	YES	High	3.Eucalypt Pl.	3
324	Young	Man	Urban	NO	High	3.Eucalypt Pl.	3
16	Young	Woman	Urban	YES	High	3.Eucalypt Pl.	2
21	MiddleAged	Man	Urban	NO	High	3.Eucalypt Pl.	2
27	Young	Man	Urban	YES	High	3.Eucalypt Pl.	2
38	Young	Woman	Urban	YES	High	3.Eucalypt Pl.	2
41	Young	Woman	Urban	YES	High	3.Eucalypt Pl.	2
66	MiddleAged	Woman	Urban	NO	High	3.Eucalypt Pl.	2
72	Young	Man	Urban	NO	High	3.Eucalypt Pl.	2
86	Senior	Man	Urban	NO	High	3.Eucalypt Pl.	2
104	MiddleAged	Man	Urban	YES	High	3.Eucalypt Pl.	2
108	Young	Man	Urban	YES	High	3.Eucalypt Pl.	2
115	MiddleAged	Woman	Urban	NO	High	3.Eucalypt Pl.	2
116	Young	Man	Urban	YES	High	3.Eucalypt Pl.	2
118	MiddleAged	Man	Urban	NO	High	3.Eucalypt Pl.	2
125	Young	Woman	Urban	YES	High	3.Eucalypt Pl.	2
129	MiddleAged	Man	Urban	NO	High	3.Eucalypt Pl.	2
142	Young	Woman	Urban	NO	High	3.Eucalypt Pl.	2
147	MiddleAged	Man	Urban	NO	High	3.Eucalypt Pl.	2
152	Young	Man	Urban	YES	High	3.Eucalypt Pl.	2
189	MiddleAged	Man	Urban	YES	High	3.Eucalypt Pl.	2
210	MiddleAged	Man	Urban	YES	High	3.Eucalypt Pl.	2
211	MiddleAged	Woman	Urban	YES	High	3.Eucalypt Pl.	2
222	MiddleAged	Woman	Urban	NO	High	3.Eucalypt Pl.	2
225	Young	Man	Urban	YES	High	3.Eucalypt Pl.	2
238	MiddleAged	Woman	Urban	NO	High	3.Eucalypt Pl.	2
243	Young	Man	Urban	YES	High	3.Eucalypt Pl.	2
247	MiddleAged	Woman	Urban	NO	High	3.Eucalypt Pl.	2
314	MiddleAged	Man	Urban	YES	High	3.Eucalypt Pl.	2
332	Young	Man	Urban	YES	High	3.Eucalypt Pl.	2
63	MiddleAged	Man	Urban	YES	High	3.Eucalypt Pl.	1
83	Young	Woman	Urban	YES	High	3.Eucalypt Pl.	1
85	Young	Woman	Urban	YES	High	3.Eucalypt Pl.	1
88	MiddleAged	Woman	Urban	YES	High	3.Eucalypt Pl.	1
97	Young	Woman	Urban	YES	High	3.Eucalypt Pl.	1
110	MiddleAged	Woman	Urban	YES	High	3.Eucalypt Pl.	1
136	Young	Woman	Urban	YES	High	3.Eucalypt Pl.	1
145	Young	Woman	Urban	YES	High	3.Eucalypt Pl.	1
150	MiddleAged	Woman	Urban	NO	High	3.Eucalypt Pl.	1
167	Young	Man	Urban	NO	High	3.Eucalypt Pl.	1
179	Young	Woman	Urban	YES	High	3.Eucalypt Pl.	1
190	Young	Woman	Urban	YES	High	3.Eucalypt Pl.	1
196	MiddleAged	Woman	Urban	YES	High	3.Eucalypt Pl.	1
202	Young	Woman	Urban	YES	High	3.Eucalypt Pl.	1
208	MiddleAged	Man	Urban	YES	High	3.Eucalypt Pl.	1
231	Young	Woman	Urban	YES	High	3.Eucalypt Pl.	1
234	Young	Woman	Urban	YES	High	3.Eucalypt Pl.	1
235	Young	Woman	Urban	NO	High	3.Eucalypt Pl.	1
248	Young	Woman	Urban	YES	High	3.Eucalypt Pl.	1
259	Young	Man	Urban	YES	High	3.Eucalypt Pl.	1
261	Young	Woman	Urban	NO	High	3.Eucalypt Pl.	1
268	Young	Woman	Urban	YES	High	3.Eucalypt Pl.	1
269	Senior	Woman	Urban	YES	High	3.Eucalypt Pl.	1
278	Young	Woman	Urban	YES	High	3.Eucalypt Pl.	1
282	Young	Man	Urban	YES	High	3.Eucalypt Pl.	1
288	Young	Woman	Urban	NO	High	3.Eucalypt Pl.	1
300	MiddleAged	Woman	Urban	YES	High	3.Eucalypt Pl.	1
308	Young	Man	Urban	YES	High	3.Eucalypt Pl.	1
316	Young	Man	Urban	YES	High	3.Eucalypt Pl.	1
338	Young	Man	Urban	YES	High	3.Eucalypt Pl.	1
341	Young	Woman	Urban	YES	High	3.Eucalypt Pl.	1
342	Young	Man	Urban	YES	High	3.Eucalypt Pl.	1
345	MiddleAged	Woman	Urban	YES	High	3.Eucalypt Pl.	1
53	Senior	Woman	Rural	YES	High	3.Eucalypt Pl.	3
107	MiddleAged	Man	Rural	YES	High	3.Eucalypt Pl.	3
56	Young	Man	Rural	YES	High	3.Eucalypt Pl.	2
144	MiddleAged	Man	Rural	YES	High	3.Eucalypt Pl.	2
331	Young	Woman	Rural	YES	High	3.Eucalypt Pl.	2
4	MiddleAged	Man	Rural	YES	High	3.Eucalypt Pl.	1
19	Young	Woman	Rural	YES	High	3.Eucalypt Pl.	1
29	Young	Woman	Rural	YES	High	3.Eucalypt Pl.	1
10	Young	Man	Urban	YES	High	3.Mixed For.	3
41	Young	Woman	Urban	YES	High	3.Mixed For.	3
83	Young	Woman	Urban	YES	High	3.Mixed For.	3
104	MiddleAged	Man	Urban	YES	High	3.Mixed For.	3
116	Young	Man	Urban	YES	High	3.Mixed For.	3
125	Young	Woman	Urban	YES	High	3.Mixed For.	3
128	MiddleAged	Man	Urban	NO	High	3.Mixed For.	3
136	Young	Woman	Urban	YES	High	3.Mixed For.	3
141	MiddleAged	Woman	Urban	NO	High	3.Mixed For.	3
156	Young	Man	Urban	YES	High	3.Mixed For.	3
167	Young	Man	Urban	NO	High	3.Mixed For.	3
185	Young	Man	Urban	NO	High	3.Mixed For.	3
190	Young	Woman	Urban	YES	High	3.Mixed For.	3
196	MiddleAged	Woman	Urban	YES	High	3.Mixed For.	3
208	MiddleAged	Man	Urban	YES	High	3.Mixed For.	3
221	MiddleAged	Woman	Urban	YES	High	3.Mixed For.	3
231	Young	Woman	Urban	YES	High	3.Mixed For.	3
235	Young	Woman	Urban	NO	High	3.Mixed For.	3
243	Young	Man	Urban	YES	High	3.Mixed For.	3
259	Young	Man	Urban	YES	High	3.Mixed For.	3
261	Young	Woman	Urban	NO	High	3.Mixed For.	3
268	Young	Woman	Urban	YES	High	3.Mixed For.	3
272	Senior	Woman	Urban	YES	High	3.Mixed For.	3
273	Young	Woman	Urban	NO	High	3.Mixed For.	3
282	Young	Man	Urban	YES	High	3.Mixed For.	3
288	Young	Woman	Urban	NO	High	3.Mixed For.	3
300	MiddleAged	Woman	Urban	YES	High	3.Mixed For.	3
324	Young	Man	Urban	NO	High	3.Mixed For.	3
332	Young	Man	Urban	YES	High	3.Mixed For.	3
342	Young	Man	Urban	YES	High	3.Mixed For.	3
16	Young	Woman	Urban	YES	High	3.Mixed For.	2
21	MiddleAged	Man	Urban	NO	High	3.Mixed For.	2
27	Young	Man	Urban	YES	High	3.Mixed For.	2
38	Young	Woman	Urban	YES	High	3.Mixed For.	2
40	Young	Woman	Urban	YES	High	3.Mixed For.	2
63	MiddleAged	Man	Urban	YES	High	3.Mixed For.	2
66	MiddleAged	Woman	Urban	NO	High	3.Mixed For.	2
85	Young	Woman	Urban	YES	High	3.Mixed For.	2
86	Senior	Man	Urban	NO	High	3.Mixed For.	2
88	MiddleAged	Woman	Urban	YES	High	3.Mixed For.	2
97	Young	Woman	Urban	YES	High	3.Mixed For.	2
108	Young	Man	Urban	YES	High	3.Mixed For.	2
110	MiddleAged	Woman	Urban	YES	High	3.Mixed For.	2
115	MiddleAged	Woman	Urban	NO	High	3.Mixed For.	2
118	MiddleAged	Man	Urban	NO	High	3.Mixed For.	2
129	MiddleAged	Man	Urban	NO	High	3.Mixed For.	2
137	MiddleAged	Woman	Urban	YES	High	3.Mixed For.	2
142	Young	Woman	Urban	NO	High	3.Mixed For.	2
145	Young	Woman	Urban	YES	High	3.Mixed For.	2
147	MiddleAged	Man	Urban	NO	High	3.Mixed For.	2
150	MiddleAged	Woman	Urban	NO	High	3.Mixed For.	2
152	Young	Man	Urban	YES	High	3.Mixed For.	2
179	Young	Woman	Urban	YES	High	3.Mixed For.	2
189	MiddleAged	Man	Urban	YES	High	3.Mixed For.	2
202	Young	Woman	Urban	YES	High	3.Mixed For.	2
210	MiddleAged	Man	Urban	YES	High	3.Mixed For.	2
211	MiddleAged	Woman	Urban	YES	High	3.Mixed For.	2
222	MiddleAged	Woman	Urban	NO	High	3.Mixed For.	2
225	Young	Man	Urban	YES	High	3.Mixed For.	2
234	Young	Woman	Urban	YES	High	3.Mixed For.	2
238	MiddleAged	Woman	Urban	NO	High	3.Mixed For.	2
247	MiddleAged	Woman	Urban	NO	High	3.Mixed For.	2
248	Young	Woman	Urban	YES	High	3.Mixed For.	2
269	Senior	Woman	Urban	YES	High	3.Mixed For.	2
278	Young	Woman	Urban	YES	High	3.Mixed For.	2
299	MiddleAged	Man	Urban	YES	High	3.Mixed For.	2
308	Young	Man	Urban	YES	High	3.Mixed For.	2
314	MiddleAged	Man	Urban	YES	High	3.Mixed For.	2
316	Young	Man	Urban	YES	High	3.Mixed For.	2
338	Young	Man	Urban	YES	High	3.Mixed For.	2
341	Young	Woman	Urban	YES	High	3.Mixed For.	2
345	MiddleAged	Woman	Urban	YES	High	3.Mixed For.	2
72	Young	Man	Urban	NO	High	3.Mixed For.	1
4	MiddleAged	Man	Rural	YES	High	3.Mixed For.	3
53	Senior	Woman	Rural	YES	High	3.Mixed For.	3
107	MiddleAged	Man	Rural	YES	High	3.Mixed For.	3
144	MiddleAged	Man	Rural	YES	High	3.Mixed For.	3
19	Young	Woman	Rural	YES	High	3.Mixed For.	2
29	Young	Woman	Rural	YES	High	3.Mixed For.	2
56	Young	Man	Rural	YES	High	3.Mixed For.	2
331	Young	Woman	Rural	YES	High	3.Mixed For.	2
156	Young	Man	Urban	YES	High	3.Shrubland	3
272	Senior	Woman	Urban	YES	High	3.Shrubland	3
10	Young	Man	Urban	YES	High	3.Shrubland	2
21	MiddleAged	Man	Urban	NO	High	3.Shrubland	2
27	Young	Man	Urban	YES	High	3.Shrubland	2
38	Young	Woman	Urban	YES	High	3.Shrubland	2
40	Young	Woman	Urban	YES	High	3.Shrubland	2
41	Young	Woman	Urban	YES	High	3.Shrubland	2
72	Young	Man	Urban	NO	High	3.Shrubland	2
83	Young	Woman	Urban	YES	High	3.Shrubland	2
88	MiddleAged	Woman	Urban	YES	High	3.Shrubland	2
97	Young	Woman	Urban	YES	High	3.Shrubland	2
110	MiddleAged	Woman	Urban	YES	High	3.Shrubland	2
116	Young	Man	Urban	YES	High	3.Shrubland	2
118	MiddleAged	Man	Urban	NO	High	3.Shrubland	2
125	Young	Woman	Urban	YES	High	3.Shrubland	2
128	MiddleAged	Man	Urban	NO	High	3.Shrubland	2
136	Young	Woman	Urban	YES	High	3.Shrubland	2
137	MiddleAged	Woman	Urban	YES	High	3.Shrubland	2
141	MiddleAged	Woman	Urban	NO	High	3.Shrubland	2
145	Young	Woman	Urban	YES	High	3.Shrubland	2
147	MiddleAged	Man	Urban	NO	High	3.Shrubland	2
150	MiddleAged	Woman	Urban	NO	High	3.Shrubland	2
167	Young	Man	Urban	NO	High	3.Shrubland	2
179	Young	Woman	Urban	YES	High	3.Shrubland	2
189	MiddleAged	Man	Urban	YES	High	3.Shrubland	2
202	Young	Woman	Urban	YES	High	3.Shrubland	2
208	MiddleAged	Man	Urban	YES	High	3.Shrubland	2
210	MiddleAged	Man	Urban	YES	High	3.Shrubland	2
211	MiddleAged	Woman	Urban	YES	High	3.Shrubland	2
221	MiddleAged	Woman	Urban	YES	High	3.Shrubland	2
225	Young	Man	Urban	YES	High	3.Shrubland	2
231	Young	Woman	Urban	YES	High	3.Shrubland	2
238	MiddleAged	Woman	Urban	NO	High	3.Shrubland	2
243	Young	Man	Urban	YES	High	3.Shrubland	2
247	MiddleAged	Woman	Urban	NO	High	3.Shrubland	2
259	Young	Man	Urban	YES	High	3.Shrubland	2
268	Young	Woman	Urban	YES	High	3.Shrubland	2
269	Senior	Woman	Urban	YES	High	3.Shrubland	2
282	Young	Man	Urban	YES	High	3.Shrubland	2
288	Young	Woman	Urban	NO	High	3.Shrubland	2
299	MiddleAged	Man	Urban	YES	High	3.Shrubland	2
308	Young	Man	Urban	YES	High	3.Shrubland	2
324	Young	Man	Urban	NO	High	3.Shrubland	2
332	Young	Man	Urban	YES	High	3.Shrubland	2
345	MiddleAged	Woman	Urban	YES	High	3.Shrubland	2
16	Young	Woman	Urban	YES	High	3.Shrubland	1
63	MiddleAged	Man	Urban	YES	High	3.Shrubland	1
66	MiddleAged	Woman	Urban	NO	High	3.Shrubland	1
85	Young	Woman	Urban	YES	High	3.Shrubland	1
86	Senior	Man	Urban	NO	High	3.Shrubland	1
104	MiddleAged	Man	Urban	YES	High	3.Shrubland	1
108	Young	Man	Urban	YES	High	3.Shrubland	1
115	MiddleAged	Woman	Urban	NO	High	3.Shrubland	1
129	MiddleAged	Man	Urban	NO	High	3.Shrubland	1
142	Young	Woman	Urban	NO	High	3.Shrubland	1
152	Young	Man	Urban	YES	High	3.Shrubland	1
185	Young	Man	Urban	NO	High	3.Shrubland	1
190	Young	Woman	Urban	YES	High	3.Shrubland	1
196	MiddleAged	Woman	Urban	YES	High	3.Shrubland	1
222	MiddleAged	Woman	Urban	NO	High	3.Shrubland	1
234	Young	Woman	Urban	YES	High	3.Shrubland	1
235	Young	Woman	Urban	NO	High	3.Shrubland	1
248	Young	Woman	Urban	YES	High	3.Shrubland	1
261	Young	Woman	Urban	NO	High	3.Shrubland	1
273	Young	Woman	Urban	NO	High	3.Shrubland	1
278	Young	Woman	Urban	YES	High	3.Shrubland	1
300	MiddleAged	Woman	Urban	YES	High	3.Shrubland	1
314	MiddleAged	Man	Urban	YES	High	3.Shrubland	1
316	Young	Man	Urban	YES	High	3.Shrubland	1
338	Young	Man	Urban	YES	High	3.Shrubland	1
341	Young	Woman	Urban	YES	High	3.Shrubland	1
342	Young	Man	Urban	YES	High	3.Shrubland	1
107	MiddleAged	Man	Rural	YES	High	3.Shrubland	3
144	MiddleAged	Man	Rural	YES	High	3.Shrubland	3
19	Young	Woman	Rural	YES	High	3.Shrubland	2
53	Senior	Woman	Rural	YES	High	3.Shrubland	2
4	MiddleAged	Man	Rural	YES	High	3.Shrubland	1
29	Young	Woman	Rural	YES	High	3.Shrubland	1
56	Young	Man	Rural	YES	High	3.Shrubland	1
331	Young	Woman	Rural	YES	High	3.Shrubland	1
10	Young	Man	Urban	YES	High	3.Pine Pl.	3
21	MiddleAged	Man	Urban	NO	High	3.Pine Pl.	3
41	Young	Woman	Urban	YES	High	3.Pine Pl.	3
72	Young	Man	Urban	NO	High	3.Pine Pl.	3
83	Young	Woman	Urban	YES	High	3.Pine Pl.	3
88	MiddleAged	Woman	Urban	YES	High	3.Pine Pl.	3
97	Young	Woman	Urban	YES	High	3.Pine Pl.	3
104	MiddleAged	Man	Urban	YES	High	3.Pine Pl.	3
110	MiddleAged	Woman	Urban	YES	High	3.Pine Pl.	3
115	MiddleAged	Woman	Urban	NO	High	3.Pine Pl.	3
116	Young	Man	Urban	YES	High	3.Pine Pl.	3
128	MiddleAged	Man	Urban	NO	High	3.Pine Pl.	3
129	MiddleAged	Man	Urban	NO	High	3.Pine Pl.	3
136	Young	Woman	Urban	YES	High	3.Pine Pl.	3
137	MiddleAged	Woman	Urban	YES	High	3.Pine Pl.	3
141	MiddleAged	Woman	Urban	NO	High	3.Pine Pl.	3
150	MiddleAged	Woman	Urban	NO	High	3.Pine Pl.	3
156	Young	Man	Urban	YES	High	3.Pine Pl.	3
167	Young	Man	Urban	NO	High	3.Pine Pl.	3
190	Young	Woman	Urban	YES	High	3.Pine Pl.	3
202	Young	Woman	Urban	YES	High	3.Pine Pl.	3
208	MiddleAged	Man	Urban	YES	High	3.Pine Pl.	3
211	MiddleAged	Woman	Urban	YES	High	3.Pine Pl.	3
221	MiddleAged	Woman	Urban	YES	High	3.Pine Pl.	3
231	Young	Woman	Urban	YES	High	3.Pine Pl.	3
238	MiddleAged	Woman	Urban	NO	High	3.Pine Pl.	3
243	Young	Man	Urban	YES	High	3.Pine Pl.	3
247	MiddleAged	Woman	Urban	NO	High	3.Pine Pl.	3
259	Young	Man	Urban	YES	High	3.Pine Pl.	3
268	Young	Woman	Urban	YES	High	3.Pine Pl.	3
269	Senior	Woman	Urban	YES	High	3.Pine Pl.	3
272	Senior	Woman	Urban	YES	High	3.Pine Pl.	3
282	Young	Man	Urban	YES	High	3.Pine Pl.	3
288	Young	Woman	Urban	NO	High	3.Pine Pl.	3
299	MiddleAged	Man	Urban	YES	High	3.Pine Pl.	3
324	Young	Man	Urban	NO	High	3.Pine Pl.	3
332	Young	Man	Urban	YES	High	3.Pine Pl.	3
338	Young	Man	Urban	YES	High	3.Pine Pl.	3
16	Young	Woman	Urban	YES	High	3.Pine Pl.	2
27	Young	Man	Urban	YES	High	3.Pine Pl.	2
38	Young	Woman	Urban	YES	High	3.Pine Pl.	2
40	Young	Woman	Urban	YES	High	3.Pine Pl.	2
66	MiddleAged	Woman	Urban	NO	High	3.Pine Pl.	2
85	Young	Woman	Urban	YES	High	3.Pine Pl.	2
86	Senior	Man	Urban	NO	High	3.Pine Pl.	2
108	Young	Man	Urban	YES	High	3.Pine Pl.	2
118	MiddleAged	Man	Urban	NO	High	3.Pine Pl.	2
125	Young	Woman	Urban	YES	High	3.Pine Pl.	2
142	Young	Woman	Urban	NO	High	3.Pine Pl.	2
147	MiddleAged	Man	Urban	NO	High	3.Pine Pl.	2
152	Young	Man	Urban	YES	High	3.Pine Pl.	2
179	Young	Woman	Urban	YES	High	3.Pine Pl.	2
185	Young	Man	Urban	NO	High	3.Pine Pl.	2
189	MiddleAged	Man	Urban	YES	High	3.Pine Pl.	2
196	MiddleAged	Woman	Urban	YES	High	3.Pine Pl.	2
210	MiddleAged	Man	Urban	YES	High	3.Pine Pl.	2
222	MiddleAged	Woman	Urban	NO	High	3.Pine Pl.	2
225	Young	Man	Urban	YES	High	3.Pine Pl.	2
234	Young	Woman	Urban	YES	High	3.Pine Pl.	2
235	Young	Woman	Urban	NO	High	3.Pine Pl.	2
248	Young	Woman	Urban	YES	High	3.Pine Pl.	2
261	Young	Woman	Urban	NO	High	3.Pine Pl.	2
273	Young	Woman	Urban	NO	High	3.Pine Pl.	2
278	Young	Woman	Urban	YES	High	3.Pine Pl.	2
300	MiddleAged	Woman	Urban	YES	High	3.Pine Pl.	2
308	Young	Man	Urban	YES	High	3.Pine Pl.	2
314	MiddleAged	Man	Urban	YES	High	3.Pine Pl.	2
316	Young	Man	Urban	YES	High	3.Pine Pl.	2
341	Young	Woman	Urban	YES	High	3.Pine Pl.	2
342	Young	Man	Urban	YES	High	3.Pine Pl.	2
345	MiddleAged	Woman	Urban	YES	High	3.Pine Pl.	2
63	MiddleAged	Man	Urban	YES	High	3.Pine Pl.	1
145	Young	Woman	Urban	YES	High	3.Pine Pl.	1
19	Young	Woman	Rural	YES	High	3.Pine Pl.	3
53	Senior	Woman	Rural	YES	High	3.Pine Pl.	3
107	MiddleAged	Man	Rural	YES	High	3.Pine Pl.	3
144	MiddleAged	Man	Rural	YES	High	3.Pine Pl.	3
331	Young	Woman	Rural	YES	High	3.Pine Pl.	3
4	MiddleAged	Man	Rural	YES	High	3.Pine Pl.	2
29	Young	Woman	Rural	YES	High	3.Pine Pl.	2
56	Young	Man	Rural	YES	High	3.Pine Pl.	2
30	Senior	Woman	Urban	NO	Low	3.Agricult	3
176	Senior	Woman	Urban	NO	Low	3.Agricult	3
26	MiddleAged	Woman	Urban	NO	Low	3.Agricult	2
45	MiddleAged	Woman	Urban	YES	Low	3.Agricult	2
81	MiddleAged	Man	Urban	NO	Low	3.Agricult	2
91	Senior	Man	Urban	NO	Low	3.Agricult	2
94	MiddleAged	Man	Urban	NO	Low	3.Agricult	2
99	Senior	Man	Urban	NO	Low	3.Agricult	2
112	Senior	Man	Urban	NO	Low	3.Agricult	2
122	Senior	Man	Urban	NO	Low	3.Agricult	2
166	Senior	Woman	Urban	NO	Low	3.Agricult	2
171	Senior	Man	Urban	NO	Low	3.Agricult	2
193	MiddleAged	Man	Urban	NO	Low	3.Agricult	2
207	Senior	Woman	Urban	NO	Low	3.Agricult	2
224	MiddleAged	Woman	Urban	NO	Low	3.Agricult	2
229	Senior	Man	Urban	YES	Low	3.Agricult	2
253	Senior	Man	Urban	NO	Low	3.Agricult	2
263	MiddleAged	Woman	Urban	NO	Low	3.Agricult	2
265	MiddleAged	Woman	Urban	NO	Low	3.Agricult	2
271	Senior	Woman	Urban	NO	Low	3.Agricult	2
292	MiddleAged	Woman	Urban	NO	Low	3.Agricult	2
304	Senior	Woman	Urban	NO	Low	3.Agricult	2
8	Senior	Man	Urban	NO	Low	3.Agricult	1
22	Senior	Man	Urban	NO	Low	3.Agricult	1
58	MiddleAged	Woman	Urban	YES	Low	3.Agricult	1
59	Senior	Woman	Urban	NO	Low	3.Agricult	1
61	Senior	Man	Urban	NO	Low	3.Agricult	1
67	MiddleAged	Man	Urban	YES	Low	3.Agricult	1
71	Senior	Man	Urban	NO	Low	3.Agricult	1
158	Senior	Man	Urban	NO	Low	3.Agricult	1
178	Senior	Woman	Urban	NO	Low	3.Agricult	1
183	Senior	Woman	Urban	NO	Low	3.Agricult	1
194	Senior	Woman	Urban	NO	Low	3.Agricult	1
228	MiddleAged	Woman	Urban	YES	Low	3.Agricult	1
256	Senior	Woman	Urban	YES	Low	3.Agricult	1
266	Senior	Woman	Urban	NO	Low	3.Agricult	1
287	MiddleAged	Man	Urban	NO	Low	3.Agricult	1
294	MiddleAged	Man	Urban	NO	Low	3.Agricult	1
303	Senior	Woman	Urban	NO	Low	3.Agricult	1
312	Senior	Woman	Urban	NO	Low	3.Agricult	1
326	Senior	Woman	Urban	NO	Low	3.Agricult	1
2	Senior	Woman	Rural	YES	Low	3.Agricult	3
5	Senior	Woman	Rural	NO	Low	3.Agricult	3
13	Senior	Woman	Rural	YES	Low	3.Agricult	3
51	Senior	Man	Rural	NO	Low	3.Agricult	3
120	Senior	Man	Rural	NO	Low	3.Agricult	3
133	Senior	Man	Rural	YES	Low	3.Agricult	3
154	Senior	Man	Rural	YES	Low	3.Agricult	3
165	Senior	Man	Rural	NO	Low	3.Agricult	3
219	Senior	Man	Rural	NO	Low	3.Agricult	3
275	Senior	Woman	Rural	YES	Low	3.Agricult	3
327	Senior	Woman	Rural	YES	Low	3.Agricult	3
329	Senior	Man	Rural	YES	Low	3.Agricult	3
334	Senior	Man	Rural	NO	Low	3.Agricult	3
7	Senior	Woman	Rural	NO	Low	3.Agricult	2
12	Senior	Man	Rural	YES	Low	3.Agricult	2
34	Senior	Man	Rural	YES	Low	3.Agricult	2
50	Senior	Woman	Rural	NO	Low	3.Agricult	2
62	Senior	Man	Rural	NO	Low	3.Agricult	2
77	Senior	Man	Rural	YES	Low	3.Agricult	2
80	Senior	Woman	Rural	YES	Low	3.Agricult	2
87	Senior	Man	Rural	NO	Low	3.Agricult	2
93	Senior	Woman	Rural	YES	Low	3.Agricult	2
109	Senior	Woman	Rural	YES	Low	3.Agricult	2
148	Senior	Man	Rural	YES	Low	3.Agricult	2
173	Senior	Man	Rural	NO	Low	3.Agricult	2
174	Senior	Man	Rural	YES	Low	3.Agricult	2
180	Senior	Woman	Rural	YES	Low	3.Agricult	2
200	Senior	Man	Rural	YES	Low	3.Agricult	2
213	Senior	Woman	Rural	YES	Low	3.Agricult	2
240	Senior	Woman	Rural	YES	Low	3.Agricult	2
241	Senior	Woman	Rural	NO	Low	3.Agricult	2
242	Senior	Woman	Rural	NO	Low	3.Agricult	2
258	Senior	Man	Rural	YES	Low	3.Agricult	2
289	Senior	Woman	Rural	YES	Low	3.Agricult	2
293	Senior	Woman	Rural	YES	Low	3.Agricult	2
319	Senior	Man	Rural	NO	Low	3.Agricult	2
323	Senior	Woman	Rural	YES	Low	3.Agricult	2
33	Senior	Man	Rural	NO	Low	3.Agricult	1
44	Senior	Woman	Rural	YES	Low	3.Agricult	1
52	Senior	Woman	Rural	NO	Low	3.Agricult	1
69	MiddleAged	Woman	Rural	YES	Low	3.Agricult	1
131	Senior	Woman	Rural	NO	Low	3.Agricult	1
153	Senior	Woman	Rural	NO	Low	3.Agricult	1
164	Senior	Woman	Rural	NO	Low	3.Agricult	1
215	Senior	Woman	Rural	YES	Low	3.Agricult	1
233	Senior	Woman	Rural	YES	Low	3.Agricult	1
260	Senior	Woman	Rural	NO	Low	3.Agricult	1
262	Senior	Man	Rural	YES	Low	3.Agricult	1
276	Senior	Man	Rural	YES	Low	3.Agricult	1
281	Senior	Man	Rural	YES	Low	3.Agricult	1
286	Senior	Man	Rural	YES	Low	3.Agricult	1
307	MiddleAged	Man	Rural	YES	Low	3.Agricult	1
339	Senior	Woman	Rural	YES	Low	3.Agricult	1
30	Senior	Woman	Urban	NO	Low	3.OakForest	3
58	MiddleAged	Woman	Urban	YES	Low	3.OakForest	3
59	Senior	Woman	Urban	NO	Low	3.OakForest	3
67	MiddleAged	Man	Urban	YES	Low	3.OakForest	3
71	Senior	Man	Urban	NO	Low	3.OakForest	3
81	MiddleAged	Man	Urban	NO	Low	3.OakForest	3
91	Senior	Man	Urban	NO	Low	3.OakForest	3
94	MiddleAged	Man	Urban	NO	Low	3.OakForest	3
99	Senior	Man	Urban	NO	Low	3.OakForest	3
112	Senior	Man	Urban	NO	Low	3.OakForest	3
122	Senior	Man	Urban	NO	Low	3.OakForest	3
171	Senior	Man	Urban	NO	Low	3.OakForest	3
176	Senior	Woman	Urban	NO	Low	3.OakForest	3
178	Senior	Woman	Urban	NO	Low	3.OakForest	3
183	Senior	Woman	Urban	NO	Low	3.OakForest	3
193	MiddleAged	Man	Urban	NO	Low	3.OakForest	3
194	Senior	Woman	Urban	NO	Low	3.OakForest	3
207	Senior	Woman	Urban	NO	Low	3.OakForest	3
224	MiddleAged	Woman	Urban	NO	Low	3.OakForest	3
228	MiddleAged	Woman	Urban	YES	Low	3.OakForest	3
229	Senior	Man	Urban	YES	Low	3.OakForest	3
253	Senior	Man	Urban	NO	Low	3.OakForest	3
256	Senior	Woman	Urban	YES	Low	3.OakForest	3
265	MiddleAged	Woman	Urban	NO	Low	3.OakForest	3
266	Senior	Woman	Urban	NO	Low	3.OakForest	3
271	Senior	Woman	Urban	NO	Low	3.OakForest	3
292	MiddleAged	Woman	Urban	NO	Low	3.OakForest	3
294	MiddleAged	Man	Urban	NO	Low	3.OakForest	3
303	Senior	Woman	Urban	NO	Low	3.OakForest	3
304	Senior	Woman	Urban	NO	Low	3.OakForest	3
312	Senior	Woman	Urban	NO	Low	3.OakForest	3
326	Senior	Woman	Urban	NO	Low	3.OakForest	3
8	Senior	Man	Urban	NO	Low	3.OakForest	2
22	Senior	Man	Urban	NO	Low	3.OakForest	2
26	MiddleAged	Woman	Urban	NO	Low	3.OakForest	2
45	MiddleAged	Woman	Urban	YES	Low	3.OakForest	2
61	Senior	Man	Urban	NO	Low	3.OakForest	2
158	Senior	Man	Urban	NO	Low	3.OakForest	2
166	Senior	Woman	Urban	NO	Low	3.OakForest	2
287	MiddleAged	Man	Urban	NO	Low	3.OakForest	2
263	MiddleAged	Woman	Urban	NO	Low	3.OakForest	1
2	Senior	Woman	Rural	YES	Low	3.OakForest	3
5	Senior	Woman	Rural	NO	Low	3.OakForest	3
7	Senior	Woman	Rural	NO	Low	3.OakForest	3
12	Senior	Man	Rural	YES	Low	3.OakForest	3
13	Senior	Woman	Rural	YES	Low	3.OakForest	3
33	Senior	Man	Rural	NO	Low	3.OakForest	3
44	Senior	Woman	Rural	YES	Low	3.OakForest	3
50	Senior	Woman	Rural	NO	Low	3.OakForest	3
51	Senior	Man	Rural	NO	Low	3.OakForest	3
62	Senior	Man	Rural	NO	Low	3.OakForest	3
69	MiddleAged	Woman	Rural	YES	Low	3.OakForest	3
77	Senior	Man	Rural	YES	Low	3.OakForest	3
80	Senior	Woman	Rural	YES	Low	3.OakForest	3
87	Senior	Man	Rural	NO	Low	3.OakForest	3
93	Senior	Woman	Rural	YES	Low	3.OakForest	3
109	Senior	Woman	Rural	YES	Low	3.OakForest	3
120	Senior	Man	Rural	NO	Low	3.OakForest	3
153	Senior	Woman	Rural	NO	Low	3.OakForest	3
154	Senior	Man	Rural	YES	Low	3.OakForest	3
164	Senior	Woman	Rural	NO	Low	3.OakForest	3
165	Senior	Man	Rural	NO	Low	3.OakForest	3
174	Senior	Man	Rural	YES	Low	3.OakForest	3
180	Senior	Woman	Rural	YES	Low	3.OakForest	3
200	Senior	Man	Rural	YES	Low	3.OakForest	3
213	Senior	Woman	Rural	YES	Low	3.OakForest	3
215	Senior	Woman	Rural	YES	Low	3.OakForest	3
219	Senior	Man	Rural	NO	Low	3.OakForest	3
240	Senior	Woman	Rural	YES	Low	3.OakForest	3
242	Senior	Woman	Rural	NO	Low	3.OakForest	3
258	Senior	Man	Rural	YES	Low	3.OakForest	3
260	Senior	Woman	Rural	NO	Low	3.OakForest	3
262	Senior	Man	Rural	YES	Low	3.OakForest	3
275	Senior	Woman	Rural	YES	Low	3.OakForest	3
281	Senior	Man	Rural	YES	Low	3.OakForest	3
286	Senior	Man	Rural	YES	Low	3.OakForest	3
289	Senior	Woman	Rural	YES	Low	3.OakForest	3
293	Senior	Woman	Rural	YES	Low	3.OakForest	3
307	MiddleAged	Man	Rural	YES	Low	3.OakForest	3
319	Senior	Man	Rural	NO	Low	3.OakForest	3
323	Senior	Woman	Rural	YES	Low	3.OakForest	3
327	Senior	Woman	Rural	YES	Low	3.OakForest	3
329	Senior	Man	Rural	YES	Low	3.OakForest	3
334	Senior	Man	Rural	NO	Low	3.OakForest	3
34	Senior	Man	Rural	YES	Low	3.OakForest	2
52	Senior	Woman	Rural	NO	Low	3.OakForest	2
133	Senior	Man	Rural	YES	Low	3.OakForest	2
148	Senior	Man	Rural	YES	Low	3.OakForest	2
173	Senior	Man	Rural	NO	Low	3.OakForest	2
241	Senior	Woman	Rural	NO	Low	3.OakForest	2
276	Senior	Man	Rural	YES	Low	3.OakForest	2
339	Senior	Woman	Rural	YES	Low	3.OakForest	2
131	Senior	Woman	Rural	NO	Low	3.OakForest	1
233	Senior	Woman	Rural	YES	Low	3.OakForest	1
30	Senior	Woman	Urban	NO	Low	3.Eucalypt Pl.	3
58	MiddleAged	Woman	Urban	YES	Low	3.Eucalypt Pl.	3
67	MiddleAged	Man	Urban	YES	Low	3.Eucalypt Pl.	3
81	MiddleAged	Man	Urban	NO	Low	3.Eucalypt Pl.	3
99	Senior	Man	Urban	NO	Low	3.Eucalypt Pl.	3
122	Senior	Man	Urban	NO	Low	3.Eucalypt Pl.	3
178	Senior	Woman	Urban	NO	Low	3.Eucalypt Pl.	3
193	MiddleAged	Man	Urban	NO	Low	3.Eucalypt Pl.	3
194	Senior	Woman	Urban	NO	Low	3.Eucalypt Pl.	3
207	Senior	Woman	Urban	NO	Low	3.Eucalypt Pl.	3
228	MiddleAged	Woman	Urban	YES	Low	3.Eucalypt Pl.	3
229	Senior	Man	Urban	YES	Low	3.Eucalypt Pl.	3
256	Senior	Woman	Urban	YES	Low	3.Eucalypt Pl.	3
265	MiddleAged	Woman	Urban	NO	Low	3.Eucalypt Pl.	3
266	Senior	Woman	Urban	NO	Low	3.Eucalypt Pl.	3
271	Senior	Woman	Urban	NO	Low	3.Eucalypt Pl.	3
292	MiddleAged	Woman	Urban	NO	Low	3.Eucalypt Pl.	3
294	MiddleAged	Man	Urban	NO	Low	3.Eucalypt Pl.	3
303	Senior	Woman	Urban	NO	Low	3.Eucalypt Pl.	3
304	Senior	Woman	Urban	NO	Low	3.Eucalypt Pl.	3
312	Senior	Woman	Urban	NO	Low	3.Eucalypt Pl.	3
8	Senior	Man	Urban	NO	Low	3.Eucalypt Pl.	2
22	Senior	Man	Urban	NO	Low	3.Eucalypt Pl.	2
26	MiddleAged	Woman	Urban	NO	Low	3.Eucalypt Pl.	2
45	MiddleAged	Woman	Urban	YES	Low	3.Eucalypt Pl.	2
59	Senior	Woman	Urban	NO	Low	3.Eucalypt Pl.	2
61	Senior	Man	Urban	NO	Low	3.Eucalypt Pl.	2
71	Senior	Man	Urban	NO	Low	3.Eucalypt Pl.	2
91	Senior	Man	Urban	NO	Low	3.Eucalypt Pl.	2
94	MiddleAged	Man	Urban	NO	Low	3.Eucalypt Pl.	2
158	Senior	Man	Urban	NO	Low	3.Eucalypt Pl.	2
166	Senior	Woman	Urban	NO	Low	3.Eucalypt Pl.	2
176	Senior	Woman	Urban	NO	Low	3.Eucalypt Pl.	2
183	Senior	Woman	Urban	NO	Low	3.Eucalypt Pl.	2
224	MiddleAged	Woman	Urban	NO	Low	3.Eucalypt Pl.	2
253	Senior	Man	Urban	NO	Low	3.Eucalypt Pl.	2
263	MiddleAged	Woman	Urban	NO	Low	3.Eucalypt Pl.	2
326	Senior	Woman	Urban	NO	Low	3.Eucalypt Pl.	2
112	Senior	Man	Urban	NO	Low	3.Eucalypt Pl.	1
171	Senior	Man	Urban	NO	Low	3.Eucalypt Pl.	1
287	MiddleAged	Man	Urban	NO	Low	3.Eucalypt Pl.	1
2	Senior	Woman	Rural	YES	Low	3.Eucalypt Pl.	3
5	Senior	Woman	Rural	NO	Low	3.Eucalypt Pl.	3
12	Senior	Man	Rural	YES	Low	3.Eucalypt Pl.	3
13	Senior	Woman	Rural	YES	Low	3.Eucalypt Pl.	3
33	Senior	Man	Rural	NO	Low	3.Eucalypt Pl.	3
44	Senior	Woman	Rural	YES	Low	3.Eucalypt Pl.	3
51	Senior	Man	Rural	NO	Low	3.Eucalypt Pl.	3
62	Senior	Man	Rural	NO	Low	3.Eucalypt Pl.	3
80	Senior	Woman	Rural	YES	Low	3.Eucalypt Pl.	3
93	Senior	Woman	Rural	YES	Low	3.Eucalypt Pl.	3
120	Senior	Man	Rural	NO	Low	3.Eucalypt Pl.	3
131	Senior	Woman	Rural	NO	Low	3.Eucalypt Pl.	3
153	Senior	Woman	Rural	NO	Low	3.Eucalypt Pl.	3
164	Senior	Woman	Rural	NO	Low	3.Eucalypt Pl.	3
165	Senior	Man	Rural	NO	Low	3.Eucalypt Pl.	3
174	Senior	Man	Rural	YES	Low	3.Eucalypt Pl.	3
213	Senior	Woman	Rural	YES	Low	3.Eucalypt Pl.	3
215	Senior	Woman	Rural	YES	Low	3.Eucalypt Pl.	3
219	Senior	Man	Rural	NO	Low	3.Eucalypt Pl.	3
233	Senior	Woman	Rural	YES	Low	3.Eucalypt Pl.	3
240	Senior	Woman	Rural	YES	Low	3.Eucalypt Pl.	3
242	Senior	Woman	Rural	NO	Low	3.Eucalypt Pl.	3
258	Senior	Man	Rural	YES	Low	3.Eucalypt Pl.	3
260	Senior	Woman	Rural	NO	Low	3.Eucalypt Pl.	3
262	Senior	Man	Rural	YES	Low	3.Eucalypt Pl.	3
275	Senior	Woman	Rural	YES	Low	3.Eucalypt Pl.	3
286	Senior	Man	Rural	YES	Low	3.Eucalypt Pl.	3
289	Senior	Woman	Rural	YES	Low	3.Eucalypt Pl.	3
293	Senior	Woman	Rural	YES	Low	3.Eucalypt Pl.	3
319	Senior	Man	Rural	NO	Low	3.Eucalypt Pl.	3
327	Senior	Woman	Rural	YES	Low	3.Eucalypt Pl.	3
329	Senior	Man	Rural	YES	Low	3.Eucalypt Pl.	3
334	Senior	Man	Rural	NO	Low	3.Eucalypt Pl.	3
7	Senior	Woman	Rural	NO	Low	3.Eucalypt Pl.	2
34	Senior	Man	Rural	YES	Low	3.Eucalypt Pl.	2
50	Senior	Woman	Rural	NO	Low	3.Eucalypt Pl.	2
69	MiddleAged	Woman	Rural	YES	Low	3.Eucalypt Pl.	2
77	Senior	Man	Rural	YES	Low	3.Eucalypt Pl.	2
87	Senior	Man	Rural	NO	Low	3.Eucalypt Pl.	2
109	Senior	Woman	Rural	YES	Low	3.Eucalypt Pl.	2
133	Senior	Man	Rural	YES	Low	3.Eucalypt Pl.	2
148	Senior	Man	Rural	YES	Low	3.Eucalypt Pl.	2
154	Senior	Man	Rural	YES	Low	3.Eucalypt Pl.	2
173	Senior	Man	Rural	NO	Low	3.Eucalypt Pl.	2
180	Senior	Woman	Rural	YES	Low	3.Eucalypt Pl.	2
241	Senior	Woman	Rural	NO	Low	3.Eucalypt Pl.	2
276	Senior	Man	Rural	YES	Low	3.Eucalypt Pl.	2
281	Senior	Man	Rural	YES	Low	3.Eucalypt Pl.	2
307	MiddleAged	Man	Rural	YES	Low	3.Eucalypt Pl.	2
323	Senior	Woman	Rural	YES	Low	3.Eucalypt Pl.	2
339	Senior	Woman	Rural	YES	Low	3.Eucalypt Pl.	2
52	Senior	Woman	Rural	NO	Low	3.Eucalypt Pl.	1
200	Senior	Man	Rural	YES	Low	3.Eucalypt Pl.	1
81	MiddleAged	Man	Urban	NO	Low	3.Mixed For.	3
99	Senior	Man	Urban	NO	Low	3.Mixed For.	3
122	Senior	Man	Urban	NO	Low	3.Mixed For.	3
176	Senior	Woman	Urban	NO	Low	3.Mixed For.	3
193	MiddleAged	Man	Urban	NO	Low	3.Mixed For.	3
194	Senior	Woman	Urban	NO	Low	3.Mixed For.	3
207	Senior	Woman	Urban	NO	Low	3.Mixed For.	3
228	MiddleAged	Woman	Urban	YES	Low	3.Mixed For.	3
265	MiddleAged	Woman	Urban	NO	Low	3.Mixed For.	3
266	Senior	Woman	Urban	NO	Low	3.Mixed For.	3
271	Senior	Woman	Urban	NO	Low	3.Mixed For.	3
304	Senior	Woman	Urban	NO	Low	3.Mixed For.	3
26	MiddleAged	Woman	Urban	NO	Low	3.Mixed For.	2
30	Senior	Woman	Urban	NO	Low	3.Mixed For.	2
45	MiddleAged	Woman	Urban	YES	Low	3.Mixed For.	2
59	Senior	Woman	Urban	NO	Low	3.Mixed For.	2
67	MiddleAged	Man	Urban	YES	Low	3.Mixed For.	2
71	Senior	Man	Urban	NO	Low	3.Mixed For.	2
91	Senior	Man	Urban	NO	Low	3.Mixed For.	2
94	MiddleAged	Man	Urban	NO	Low	3.Mixed For.	2
112	Senior	Man	Urban	NO	Low	3.Mixed For.	2
158	Senior	Man	Urban	NO	Low	3.Mixed For.	2
166	Senior	Woman	Urban	NO	Low	3.Mixed For.	2
171	Senior	Man	Urban	NO	Low	3.Mixed For.	2
178	Senior	Woman	Urban	NO	Low	3.Mixed For.	2
183	Senior	Woman	Urban	NO	Low	3.Mixed For.	2
224	MiddleAged	Woman	Urban	NO	Low	3.Mixed For.	2
253	Senior	Man	Urban	NO	Low	3.Mixed For.	2
256	Senior	Woman	Urban	YES	Low	3.Mixed For.	2
263	MiddleAged	Woman	Urban	NO	Low	3.Mixed For.	2
287	MiddleAged	Man	Urban	NO	Low	3.Mixed For.	2
292	MiddleAged	Woman	Urban	NO	Low	3.Mixed For.	2
294	MiddleAged	Man	Urban	NO	Low	3.Mixed For.	2
303	Senior	Woman	Urban	NO	Low	3.Mixed For.	2
312	Senior	Woman	Urban	NO	Low	3.Mixed For.	2
326	Senior	Woman	Urban	NO	Low	3.Mixed For.	2
8	Senior	Man	Urban	NO	Low	3.Mixed For.	1
22	Senior	Man	Urban	NO	Low	3.Mixed For.	1
58	MiddleAged	Woman	Urban	YES	Low	3.Mixed For.	1
61	Senior	Man	Urban	NO	Low	3.Mixed For.	1
229	Senior	Man	Urban	YES	Low	3.Mixed For.	1
2	Senior	Woman	Rural	YES	Low	3.Mixed For.	3
12	Senior	Man	Rural	YES	Low	3.Mixed For.	3
51	Senior	Man	Rural	NO	Low	3.Mixed For.	3
80	Senior	Woman	Rural	YES	Low	3.Mixed For.	3
120	Senior	Man	Rural	NO	Low	3.Mixed For.	3
165	Senior	Man	Rural	NO	Low	3.Mixed For.	3
174	Senior	Man	Rural	YES	Low	3.Mixed For.	3
200	Senior	Man	Rural	YES	Low	3.Mixed For.	3
219	Senior	Man	Rural	NO	Low	3.Mixed For.	3
242	Senior	Woman	Rural	NO	Low	3.Mixed For.	3
286	Senior	Man	Rural	YES	Low	3.Mixed For.	3
289	Senior	Woman	Rural	YES	Low	3.Mixed For.	3
293	Senior	Woman	Rural	YES	Low	3.Mixed For.	3
319	Senior	Man	Rural	NO	Low	3.Mixed For.	3
327	Senior	Woman	Rural	YES	Low	3.Mixed For.	3
5	Senior	Woman	Rural	NO	Low	3.Mixed For.	2
7	Senior	Woman	Rural	NO	Low	3.Mixed For.	2
13	Senior	Woman	Rural	YES	Low	3.Mixed For.	2
44	Senior	Woman	Rural	YES	Low	3.Mixed For.	2
50	Senior	Woman	Rural	NO	Low	3.Mixed For.	2
52	Senior	Woman	Rural	NO	Low	3.Mixed For.	2
62	Senior	Man	Rural	NO	Low	3.Mixed For.	2
69	MiddleAged	Woman	Rural	YES	Low	3.Mixed For.	2
77	Senior	Man	Rural	YES	Low	3.Mixed For.	2
87	Senior	Man	Rural	NO	Low	3.Mixed For.	2
93	Senior	Woman	Rural	YES	Low	3.Mixed For.	2
109	Senior	Woman	Rural	YES	Low	3.Mixed For.	2
131	Senior	Woman	Rural	NO	Low	3.Mixed For.	2
133	Senior	Man	Rural	YES	Low	3.Mixed For.	2
153	Senior	Woman	Rural	NO	Low	3.Mixed For.	2
154	Senior	Man	Rural	YES	Low	3.Mixed For.	2
173	Senior	Man	Rural	NO	Low	3.Mixed For.	2
180	Senior	Woman	Rural	YES	Low	3.Mixed For.	2
213	Senior	Woman	Rural	YES	Low	3.Mixed For.	2
215	Senior	Woman	Rural	YES	Low	3.Mixed For.	2
233	Senior	Woman	Rural	YES	Low	3.Mixed For.	2
240	Senior	Woman	Rural	YES	Low	3.Mixed For.	2
241	Senior	Woman	Rural	NO	Low	3.Mixed For.	2
258	Senior	Man	Rural	YES	Low	3.Mixed For.	2
260	Senior	Woman	Rural	NO	Low	3.Mixed For.	2
262	Senior	Man	Rural	YES	Low	3.Mixed For.	2
275	Senior	Woman	Rural	YES	Low	3.Mixed For.	2
276	Senior	Man	Rural	YES	Low	3.Mixed For.	2
281	Senior	Man	Rural	YES	Low	3.Mixed For.	2
323	Senior	Woman	Rural	YES	Low	3.Mixed For.	2
329	Senior	Man	Rural	YES	Low	3.Mixed For.	2
33	Senior	Man	Rural	NO	Low	3.Mixed For.	1
34	Senior	Man	Rural	YES	Low	3.Mixed For.	1
148	Senior	Man	Rural	YES	Low	3.Mixed For.	1
164	Senior	Woman	Rural	NO	Low	3.Mixed For.	1
307	MiddleAged	Man	Rural	YES	Low	3.Mixed For.	1
334	Senior	Man	Rural	NO	Low	3.Mixed For.	1
339	Senior	Woman	Rural	YES	Low	3.Mixed For.	1
26	MiddleAged	Woman	Urban	NO	Low	3.Shrubland	2
30	Senior	Woman	Urban	NO	Low	3.Shrubland	2
45	MiddleAged	Woman	Urban	YES	Low	3.Shrubland	2
58	MiddleAged	Woman	Urban	YES	Low	3.Shrubland	2
81	MiddleAged	Man	Urban	NO	Low	3.Shrubland	2
94	MiddleAged	Man	Urban	NO	Low	3.Shrubland	2
99	Senior	Man	Urban	NO	Low	3.Shrubland	2
112	Senior	Man	Urban	NO	Low	3.Shrubland	2
122	Senior	Man	Urban	NO	Low	3.Shrubland	2
171	Senior	Man	Urban	NO	Low	3.Shrubland	2
176	Senior	Woman	Urban	NO	Low	3.Shrubland	2
193	MiddleAged	Man	Urban	NO	Low	3.Shrubland	2
194	Senior	Woman	Urban	NO	Low	3.Shrubland	2
207	Senior	Woman	Urban	NO	Low	3.Shrubland	2
224	MiddleAged	Woman	Urban	NO	Low	3.Shrubland	2
228	MiddleAged	Woman	Urban	YES	Low	3.Shrubland	2
229	Senior	Man	Urban	YES	Low	3.Shrubland	2
263	MiddleAged	Woman	Urban	NO	Low	3.Shrubland	2
265	MiddleAged	Woman	Urban	NO	Low	3.Shrubland	2
266	Senior	Woman	Urban	NO	Low	3.Shrubland	2
271	Senior	Woman	Urban	NO	Low	3.Shrubland	2
304	Senior	Woman	Urban	NO	Low	3.Shrubland	2
8	Senior	Man	Urban	NO	Low	3.Shrubland	1
22	Senior	Man	Urban	NO	Low	3.Shrubland	1
59	Senior	Woman	Urban	NO	Low	3.Shrubland	1
61	Senior	Man	Urban	NO	Low	3.Shrubland	1
67	MiddleAged	Man	Urban	YES	Low	3.Shrubland	1
71	Senior	Man	Urban	NO	Low	3.Shrubland	1
91	Senior	Man	Urban	NO	Low	3.Shrubland	1
158	Senior	Man	Urban	NO	Low	3.Shrubland	1
166	Senior	Woman	Urban	NO	Low	3.Shrubland	1
178	Senior	Woman	Urban	NO	Low	3.Shrubland	1
183	Senior	Woman	Urban	NO	Low	3.Shrubland	1
253	Senior	Man	Urban	NO	Low	3.Shrubland	1
256	Senior	Woman	Urban	YES	Low	3.Shrubland	1
287	MiddleAged	Man	Urban	NO	Low	3.Shrubland	1
292	MiddleAged	Woman	Urban	NO	Low	3.Shrubland	1
294	MiddleAged	Man	Urban	NO	Low	3.Shrubland	1
303	Senior	Woman	Urban	NO	Low	3.Shrubland	1
312	Senior	Woman	Urban	NO	Low	3.Shrubland	1
326	Senior	Woman	Urban	NO	Low	3.Shrubland	1
51	Senior	Man	Rural	NO	Low	3.Shrubland	3
131	Senior	Woman	Rural	NO	Low	3.Shrubland	3
233	Senior	Woman	Rural	YES	Low	3.Shrubland	3
260	Senior	Woman	Rural	NO	Low	3.Shrubland	3
262	Senior	Man	Rural	YES	Low	3.Shrubland	3
2	Senior	Woman	Rural	YES	Low	3.Shrubland	2
13	Senior	Woman	Rural	YES	Low	3.Shrubland	2
33	Senior	Man	Rural	NO	Low	3.Shrubland	2
44	Senior	Woman	Rural	YES	Low	3.Shrubland	2
50	Senior	Woman	Rural	NO	Low	3.Shrubland	2
52	Senior	Woman	Rural	NO	Low	3.Shrubland	2
69	MiddleAged	Woman	Rural	YES	Low	3.Shrubland	2
80	Senior	Woman	Rural	YES	Low	3.Shrubland	2
109	Senior	Woman	Rural	YES	Low	3.Shrubland	2
120	Senior	Man	Rural	NO	Low	3.Shrubland	2
153	Senior	Woman	Rural	NO	Low	3.Shrubland	2
164	Senior	Woman	Rural	NO	Low	3.Shrubland	2
165	Senior	Man	Rural	NO	Low	3.Shrubland	2
173	Senior	Man	Rural	NO	Low	3.Shrubland	2
174	Senior	Man	Rural	YES	Low	3.Shrubland	2
200	Senior	Man	Rural	YES	Low	3.Shrubland	2
219	Senior	Man	Rural	NO	Low	3.Shrubland	2
242	Senior	Woman	Rural	NO	Low	3.Shrubland	2
275	Senior	Woman	Rural	YES	Low	3.Shrubland	2
286	Senior	Man	Rural	YES	Low	3.Shrubland	2
293	Senior	Woman	Rural	YES	Low	3.Shrubland	2
323	Senior	Woman	Rural	YES	Low	3.Shrubland	2
327	Senior	Woman	Rural	YES	Low	3.Shrubland	2
5	Senior	Woman	Rural	NO	Low	3.Shrubland	1
7	Senior	Woman	Rural	NO	Low	3.Shrubland	1
12	Senior	Man	Rural	YES	Low	3.Shrubland	1
34	Senior	Man	Rural	YES	Low	3.Shrubland	1
62	Senior	Man	Rural	NO	Low	3.Shrubland	1
77	Senior	Man	Rural	YES	Low	3.Shrubland	1
87	Senior	Man	Rural	NO	Low	3.Shrubland	1
93	Senior	Woman	Rural	YES	Low	3.Shrubland	1
133	Senior	Man	Rural	YES	Low	3.Shrubland	1
148	Senior	Man	Rural	YES	Low	3.Shrubland	1
154	Senior	Man	Rural	YES	Low	3.Shrubland	1
180	Senior	Woman	Rural	YES	Low	3.Shrubland	1
213	Senior	Woman	Rural	YES	Low	3.Shrubland	1
215	Senior	Woman	Rural	YES	Low	3.Shrubland	1
240	Senior	Woman	Rural	YES	Low	3.Shrubland	1
241	Senior	Woman	Rural	NO	Low	3.Shrubland	1
258	Senior	Man	Rural	YES	Low	3.Shrubland	1
276	Senior	Man	Rural	YES	Low	3.Shrubland	1
281	Senior	Man	Rural	YES	Low	3.Shrubland	1
289	Senior	Woman	Rural	YES	Low	3.Shrubland	1
307	MiddleAged	Man	Rural	YES	Low	3.Shrubland	1
319	Senior	Man	Rural	NO	Low	3.Shrubland	1
329	Senior	Man	Rural	YES	Low	3.Shrubland	1
334	Senior	Man	Rural	NO	Low	3.Shrubland	1
339	Senior	Woman	Rural	YES	Low	3.Shrubland	1
45	MiddleAged	Woman	Urban	YES	Low	3.Pine Pl.	3
61	Senior	Man	Urban	NO	Low	3.Pine Pl.	3
81	MiddleAged	Man	Urban	NO	Low	3.Pine Pl.	3
91	Senior	Man	Urban	NO	Low	3.Pine Pl.	3
94	MiddleAged	Man	Urban	NO	Low	3.Pine Pl.	3
99	Senior	Man	Urban	NO	Low	3.Pine Pl.	3
112	Senior	Man	Urban	NO	Low	3.Pine Pl.	3
122	Senior	Man	Urban	NO	Low	3.Pine Pl.	3
171	Senior	Man	Urban	NO	Low	3.Pine Pl.	3
176	Senior	Woman	Urban	NO	Low	3.Pine Pl.	3
193	MiddleAged	Man	Urban	NO	Low	3.Pine Pl.	3
194	Senior	Woman	Urban	NO	Low	3.Pine Pl.	3
207	Senior	Woman	Urban	NO	Low	3.Pine Pl.	3
224	MiddleAged	Woman	Urban	NO	Low	3.Pine Pl.	3
228	MiddleAged	Woman	Urban	YES	Low	3.Pine Pl.	3
229	Senior	Man	Urban	YES	Low	3.Pine Pl.	3
265	MiddleAged	Woman	Urban	NO	Low	3.Pine Pl.	3
266	Senior	Woman	Urban	NO	Low	3.Pine Pl.	3
271	Senior	Woman	Urban	NO	Low	3.Pine Pl.	3
292	MiddleAged	Woman	Urban	NO	Low	3.Pine Pl.	3
294	MiddleAged	Man	Urban	NO	Low	3.Pine Pl.	3
304	Senior	Woman	Urban	NO	Low	3.Pine Pl.	3
8	Senior	Man	Urban	NO	Low	3.Pine Pl.	2
22	Senior	Man	Urban	NO	Low	3.Pine Pl.	2
26	MiddleAged	Woman	Urban	NO	Low	3.Pine Pl.	2
30	Senior	Woman	Urban	NO	Low	3.Pine Pl.	2
58	MiddleAged	Woman	Urban	YES	Low	3.Pine Pl.	2
59	Senior	Woman	Urban	NO	Low	3.Pine Pl.	2
67	MiddleAged	Man	Urban	YES	Low	3.Pine Pl.	2
71	Senior	Man	Urban	NO	Low	3.Pine Pl.	2
158	Senior	Man	Urban	NO	Low	3.Pine Pl.	2
166	Senior	Woman	Urban	NO	Low	3.Pine Pl.	2
178	Senior	Woman	Urban	NO	Low	3.Pine Pl.	2
183	Senior	Woman	Urban	NO	Low	3.Pine Pl.	2
253	Senior	Man	Urban	NO	Low	3.Pine Pl.	2
256	Senior	Woman	Urban	YES	Low	3.Pine Pl.	2
263	MiddleAged	Woman	Urban	NO	Low	3.Pine Pl.	2
287	MiddleAged	Man	Urban	NO	Low	3.Pine Pl.	2
303	Senior	Woman	Urban	NO	Low	3.Pine Pl.	2
312	Senior	Woman	Urban	NO	Low	3.Pine Pl.	2
326	Senior	Woman	Urban	NO	Low	3.Pine Pl.	2
2	Senior	Woman	Rural	YES	Low	3.Pine Pl.	3
13	Senior	Woman	Rural	YES	Low	3.Pine Pl.	3
33	Senior	Man	Rural	NO	Low	3.Pine Pl.	3
34	Senior	Man	Rural	YES	Low	3.Pine Pl.	3
44	Senior	Woman	Rural	YES	Low	3.Pine Pl.	3
50	Senior	Woman	Rural	NO	Low	3.Pine Pl.	3
51	Senior	Man	Rural	NO	Low	3.Pine Pl.	3
52	Senior	Woman	Rural	NO	Low	3.Pine Pl.	3
69	MiddleAged	Woman	Rural	YES	Low	3.Pine Pl.	3
80	Senior	Woman	Rural	YES	Low	3.Pine Pl.	3
109	Senior	Woman	Rural	YES	Low	3.Pine Pl.	3
120	Senior	Man	Rural	NO	Low	3.Pine Pl.	3
148	Senior	Man	Rural	YES	Low	3.Pine Pl.	3
153	Senior	Woman	Rural	NO	Low	3.Pine Pl.	3
154	Senior	Man	Rural	YES	Low	3.Pine Pl.	3
164	Senior	Woman	Rural	NO	Low	3.Pine Pl.	3
165	Senior	Man	Rural	NO	Low	3.Pine Pl.	3
174	Senior	Man	Rural	YES	Low	3.Pine Pl.	3
200	Senior	Man	Rural	YES	Low	3.Pine Pl.	3
219	Senior	Man	Rural	NO	Low	3.Pine Pl.	3
242	Senior	Woman	Rural	NO	Low	3.Pine Pl.	3
262	Senior	Man	Rural	YES	Low	3.Pine Pl.	3
275	Senior	Woman	Rural	YES	Low	3.Pine Pl.	3
286	Senior	Man	Rural	YES	Low	3.Pine Pl.	3
289	Senior	Woman	Rural	YES	Low	3.Pine Pl.	3
293	Senior	Woman	Rural	YES	Low	3.Pine Pl.	3
319	Senior	Man	Rural	NO	Low	3.Pine Pl.	3
323	Senior	Woman	Rural	YES	Low	3.Pine Pl.	3
327	Senior	Woman	Rural	YES	Low	3.Pine Pl.	3
334	Senior	Man	Rural	NO	Low	3.Pine Pl.	3
5	Senior	Woman	Rural	NO	Low	3.Pine Pl.	2
7	Senior	Woman	Rural	NO	Low	3.Pine Pl.	2
12	Senior	Man	Rural	YES	Low	3.Pine Pl.	2
62	Senior	Man	Rural	NO	Low	3.Pine Pl.	2
77	Senior	Man	Rural	YES	Low	3.Pine Pl.	2
87	Senior	Man	Rural	NO	Low	3.Pine Pl.	2
93	Senior	Woman	Rural	YES	Low	3.Pine Pl.	2
131	Senior	Woman	Rural	NO	Low	3.Pine Pl.	2
133	Senior	Man	Rural	YES	Low	3.Pine Pl.	2
173	Senior	Man	Rural	NO	Low	3.Pine Pl.	2
180	Senior	Woman	Rural	YES	Low	3.Pine Pl.	2
213	Senior	Woman	Rural	YES	Low	3.Pine Pl.	2
215	Senior	Woman	Rural	YES	Low	3.Pine Pl.	2
233	Senior	Woman	Rural	YES	Low	3.Pine Pl.	2
240	Senior	Woman	Rural	YES	Low	3.Pine Pl.	2
241	Senior	Woman	Rural	NO	Low	3.Pine Pl.	2
258	Senior	Man	Rural	YES	Low	3.Pine Pl.	2
260	Senior	Woman	Rural	NO	Low	3.Pine Pl.	2
276	Senior	Man	Rural	YES	Low	3.Pine Pl.	2
281	Senior	Man	Rural	YES	Low	3.Pine Pl.	2
307	MiddleAged	Man	Rural	YES	Low	3.Pine Pl.	2
329	Senior	Man	Rural	YES	Low	3.Pine Pl.	2
339	Senior	Woman	Rural	YES	Low	3.Pine Pl.	2
14	MiddleAged	Woman	Urban	YES	Medium	3.Agricult	3
20	MiddleAged	Woman	Urban	NO	Medium	3.Agricult	3
31	MiddleAged	Woman	Urban	NO	Medium	3.Agricult	3
46	MiddleAged	Woman	Urban	YES	Medium	3.Agricult	3
65	MiddleAged	Woman	Urban	NO	Medium	3.Agricult	3
73	MiddleAged	Man	Urban	YES	Medium	3.Agricult	3
74	MiddleAged	Woman	Urban	YES	Medium	3.Agricult	3
75	Young	Woman	Urban	NO	Medium	3.Agricult	3
76	MiddleAged	Woman	Urban	NO	Medium	3.Agricult	3
102	Senior	Woman	Urban	YES	Medium	3.Agricult	3
151	MiddleAged	Woman	Urban	NO	Medium	3.Agricult	3
201	Senior	Woman	Urban	YES	Medium	3.Agricult	3
226	Young	Man	Urban	YES	Medium	3.Agricult	3
279	Young	Woman	Urban	YES	Medium	3.Agricult	3
283	Young	Woman	Urban	YES	Medium	3.Agricult	3
344	MiddleAged	Woman	Urban	NO	Medium	3.Agricult	3
1	MiddleAged	Woman	Urban	NO	Medium	3.Agricult	2
6	Young	Woman	Urban	YES	Medium	3.Agricult	2
15	MiddleAged	Woman	Urban	YES	Medium	3.Agricult	2
24	MiddleAged	Woman	Urban	YES	Medium	3.Agricult	2
25	MiddleAged	Man	Urban	NO	Medium	3.Agricult	2
35	MiddleAged	Woman	Urban	YES	Medium	3.Agricult	2
42	MiddleAged	Man	Urban	YES	Medium	3.Agricult	2
47	Young	Man	Urban	YES	Medium	3.Agricult	2
49	Senior	Woman	Urban	NO	Medium	3.Agricult	2
78	MiddleAged	Woman	Urban	NO	Medium	3.Agricult	2
79	MiddleAged	Man	Urban	NO	Medium	3.Agricult	2
84	Senior	Man	Urban	NO	Medium	3.Agricult	2
95	Young	Woman	Urban	NO	Medium	3.Agricult	2
96	MiddleAged	Woman	Urban	NO	Medium	3.Agricult	2
106	MiddleAged	Man	Urban	NO	Medium	3.Agricult	2
117	MiddleAged	Man	Urban	NO	Medium	3.Agricult	2
132	Young	Man	Urban	YES	Medium	3.Agricult	2
135	Senior	Man	Urban	YES	Medium	3.Agricult	2
146	MiddleAged	Woman	Urban	NO	Medium	3.Agricult	2
159	MiddleAged	Woman	Urban	NO	Medium	3.Agricult	2
162	MiddleAged	Woman	Urban	NO	Medium	3.Agricult	2
163	Senior	Woman	Urban	NO	Medium	3.Agricult	2
168	MiddleAged	Woman	Urban	NO	Medium	3.Agricult	2
169	MiddleAged	Woman	Urban	NO	Medium	3.Agricult	2
170	MiddleAged	Woman	Urban	YES	Medium	3.Agricult	2
172	MiddleAged	Woman	Urban	YES	Medium	3.Agricult	2
175	MiddleAged	Woman	Urban	NO	Medium	3.Agricult	2
177	MiddleAged	Man	Urban	NO	Medium	3.Agricult	2
181	Senior	Man	Urban	NO	Medium	3.Agricult	2
182	MiddleAged	Man	Urban	NO	Medium	3.Agricult	2
184	MiddleAged	Man	Urban	NO	Medium	3.Agricult	2
188	MiddleAged	Man	Urban	YES	Medium	3.Agricult	2
191	MiddleAged	Woman	Urban	YES	Medium	3.Agricult	2
192	Young	Man	Urban	YES	Medium	3.Agricult	2
198	MiddleAged	Man	Urban	YES	Medium	3.Agricult	2
206	MiddleAged	Woman	Urban	NO	Medium	3.Agricult	2
212	MiddleAged	Woman	Urban	NO	Medium	3.Agricult	2
214	MiddleAged	Man	Urban	NO	Medium	3.Agricult	2
216	MiddleAged	Woman	Urban	NO	Medium	3.Agricult	2
217	MiddleAged	Man	Urban	YES	Medium	3.Agricult	2
232	Young	Man	Urban	YES	Medium	3.Agricult	2
236	MiddleAged	Man	Urban	NO	Medium	3.Agricult	2
239	MiddleAged	Man	Urban	NO	Medium	3.Agricult	2
244	Young	Man	Urban	NO	Medium	3.Agricult	2
249	MiddleAged	Man	Urban	YES	Medium	3.Agricult	2
250	MiddleAged	Man	Urban	NO	Medium	3.Agricult	2
251	MiddleAged	Woman	Urban	NO	Medium	3.Agricult	2
252	Senior	Woman	Urban	YES	Medium	3.Agricult	2
254	MiddleAged	Woman	Urban	NO	Medium	3.Agricult	2
255	MiddleAged	Man	Urban	YES	Medium	3.Agricult	2
257	MiddleAged	Woman	Urban	NO	Medium	3.Agricult	2
264	MiddleAged	Man	Urban	NO	Medium	3.Agricult	2
274	MiddleAged	Man	Urban	NO	Medium	3.Agricult	2
284	MiddleAged	Woman	Urban	NO	Medium	3.Agricult	2
295	Senior	Woman	Urban	YES	Medium	3.Agricult	2
297	MiddleAged	Man	Urban	YES	Medium	3.Agricult	2
302	MiddleAged	Woman	Urban	YES	Medium	3.Agricult	2
313	MiddleAged	Man	Urban	NO	Medium	3.Agricult	2
315	MiddleAged	Man	Urban	NO	Medium	3.Agricult	2
317	Senior	Woman	Urban	NO	Medium	3.Agricult	2
337	MiddleAged	Woman	Urban	NO	Medium	3.Agricult	2
340	MiddleAged	Woman	Urban	NO	Medium	3.Agricult	2
3	MiddleAged	Man	Urban	YES	Medium	3.Agricult	1
9	Young	Woman	Urban	YES	Medium	3.Agricult	1
11	MiddleAged	Man	Urban	YES	Medium	3.Agricult	1
18	Young	Man	Urban	YES	Medium	3.Agricult	1
23	MiddleAged	Man	Urban	YES	Medium	3.Agricult	1
36	MiddleAged	Woman	Urban	YES	Medium	3.Agricult	1
37	MiddleAged	Man	Urban	NO	Medium	3.Agricult	1
54	MiddleAged	Woman	Urban	NO	Medium	3.Agricult	1
55	MiddleAged	Man	Urban	NO	Medium	3.Agricult	1
60	Senior	Woman	Urban	NO	Medium	3.Agricult	1
68	MiddleAged	Woman	Urban	NO	Medium	3.Agricult	1
70	MiddleAged	Woman	Urban	NO	Medium	3.Agricult	1
82	MiddleAged	Man	Urban	YES	Medium	3.Agricult	1
90	MiddleAged	Woman	Urban	NO	Medium	3.Agricult	1
92	MiddleAged	Man	Urban	YES	Medium	3.Agricult	1
98	Young	Man	Urban	NO	Medium	3.Agricult	1
100	MiddleAged	Man	Urban	NO	Medium	3.Agricult	1
103	Young	Woman	Urban	YES	Medium	3.Agricult	1
113	Senior	Woman	Urban	NO	Medium	3.Agricult	1
114	Young	Woman	Urban	NO	Medium	3.Agricult	1
119	MiddleAged	Woman	Urban	NO	Medium	3.Agricult	1
121	MiddleAged	Woman	Urban	NO	Medium	3.Agricult	1
123	Young	Man	Urban	YES	Medium	3.Agricult	1
124	MiddleAged	Woman	Urban	NO	Medium	3.Agricult	1
126	MiddleAged	Man	Urban	YES	Medium	3.Agricult	1
130	Young	Woman	Urban	YES	Medium	3.Agricult	1
134	MiddleAged	Woman	Urban	YES	Medium	3.Agricult	1
139	Senior	Man	Urban	NO	Medium	3.Agricult	1
143	MiddleAged	Man	Urban	NO	Medium	3.Agricult	1
149	MiddleAged	Woman	Urban	NO	Medium	3.Agricult	1
155	MiddleAged	Man	Urban	YES	Medium	3.Agricult	1
157	MiddleAged	Woman	Urban	YES	Medium	3.Agricult	1
160	MiddleAged	Man	Urban	NO	Medium	3.Agricult	1
187	Senior	Woman	Urban	NO	Medium	3.Agricult	1
195	MiddleAged	Woman	Urban	NO	Medium	3.Agricult	1
205	Young	Man	Urban	NO	Medium	3.Agricult	1
223	MiddleAged	Man	Urban	NO	Medium	3.Agricult	1
230	MiddleAged	Woman	Urban	NO	Medium	3.Agricult	1
237	MiddleAged	Woman	Urban	NO	Medium	3.Agricult	1
245	MiddleAged	Woman	Urban	YES	Medium	3.Agricult	1
267	MiddleAged	Man	Urban	NO	Medium	3.Agricult	1
270	Young	Woman	Urban	NO	Medium	3.Agricult	1
280	Young	Woman	Urban	YES	Medium	3.Agricult	1
290	Young	Man	Urban	YES	Medium	3.Agricult	1
291	MiddleAged	Man	Urban	NO	Medium	3.Agricult	1
298	Young	Man	Urban	NO	Medium	3.Agricult	1
301	MiddleAged	Man	Urban	NO	Medium	3.Agricult	1
318	MiddleAged	Woman	Urban	YES	Medium	3.Agricult	1
321	Senior	Man	Urban	NO	Medium	3.Agricult	1
325	MiddleAged	Man	Urban	NO	Medium	3.Agricult	1
328	MiddleAged	Woman	Urban	YES	Medium	3.Agricult	1
330	MiddleAged	Woman	Urban	NO	Medium	3.Agricult	1
333	MiddleAged	Woman	Urban	NO	Medium	3.Agricult	1
336	MiddleAged	Woman	Urban	YES	Medium	3.Agricult	1
17	Senior	Woman	Rural	NO	Medium	3.Agricult	3
28	Young	Man	Rural	YES	Medium	3.Agricult	3
43	MiddleAged	Man	Rural	NO	Medium	3.Agricult	3
48	MiddleAged	Man	Rural	NO	Medium	3.Agricult	3
111	MiddleAged	Woman	Rural	YES	Medium	3.Agricult	3
186	MiddleAged	Woman	Rural	YES	Medium	3.Agricult	3
246	Senior	Woman	Rural	NO	Medium	3.Agricult	3
309	MiddleAged	Man	Rural	YES	Medium	3.Agricult	3
335	MiddleAged	Woman	Rural	YES	Medium	3.Agricult	3
32	Senior	Woman	Rural	NO	Medium	3.Agricult	2
39	MiddleAged	Man	Rural	NO	Medium	3.Agricult	2
57	MiddleAged	Man	Rural	NO	Medium	3.Agricult	2
64	MiddleAged	Woman	Rural	YES	Medium	3.Agricult	2
89	Young	Woman	Rural	NO	Medium	3.Agricult	2
101	Senior	Man	Rural	NO	Medium	3.Agricult	2
105	Senior	Woman	Rural	YES	Medium	3.Agricult	2
127	Senior	Woman	Rural	YES	Medium	3.Agricult	2
138	Senior	Woman	Rural	YES	Medium	3.Agricult	2
161	MiddleAged	Woman	Rural	YES	Medium	3.Agricult	2
197	MiddleAged	Man	Rural	YES	Medium	3.Agricult	2
199	Young	Woman	Rural	YES	Medium	3.Agricult	2
203	Senior	Man	Rural	YES	Medium	3.Agricult	2
209	Senior	Man	Rural	YES	Medium	3.Agricult	2
218	MiddleAged	Woman	Rural	YES	Medium	3.Agricult	2
220	Senior	Woman	Rural	YES	Medium	3.Agricult	2
227	Senior	Woman	Rural	YES	Medium	3.Agricult	2
285	MiddleAged	Woman	Rural	YES	Medium	3.Agricult	2
296	Senior	Woman	Rural	YES	Medium	3.Agricult	2
305	MiddleAged	Woman	Rural	YES	Medium	3.Agricult	2
306	Senior	Man	Rural	YES	Medium	3.Agricult	2
310	MiddleAged	Woman	Rural	YES	Medium	3.Agricult	2
311	Young	Woman	Rural	YES	Medium	3.Agricult	2
320	MiddleAged	Woman	Rural	YES	Medium	3.Agricult	2
322	Senior	Woman	Rural	NO	Medium	3.Agricult	2
140	MiddleAged	Man	Rural	YES	Medium	3.Agricult	1
204	MiddleAged	Woman	Rural	YES	Medium	3.Agricult	1
277	Senior	Man	Rural	YES	Medium	3.Agricult	1
343	Senior	Woman	Rural	YES	Medium	3.Agricult	1
1	MiddleAged	Woman	Urban	NO	Medium	3.OakForest	3
3	MiddleAged	Man	Urban	YES	Medium	3.OakForest	3
6	Young	Woman	Urban	YES	Medium	3.OakForest	3
9	Young	Woman	Urban	YES	Medium	3.OakForest	3
11	MiddleAged	Man	Urban	YES	Medium	3.OakForest	3
14	MiddleAged	Woman	Urban	YES	Medium	3.OakForest	3
15	MiddleAged	Woman	Urban	YES	Medium	3.OakForest	3
18	Young	Man	Urban	YES	Medium	3.OakForest	3
20	MiddleAged	Woman	Urban	NO	Medium	3.OakForest	3
23	MiddleAged	Man	Urban	YES	Medium	3.OakForest	3
24	MiddleAged	Woman	Urban	YES	Medium	3.OakForest	3
25	MiddleAged	Man	Urban	NO	Medium	3.OakForest	3
31	MiddleAged	Woman	Urban	NO	Medium	3.OakForest	3
35	MiddleAged	Woman	Urban	YES	Medium	3.OakForest	3
37	MiddleAged	Man	Urban	NO	Medium	3.OakForest	3
42	MiddleAged	Man	Urban	YES	Medium	3.OakForest	3
46	MiddleAged	Woman	Urban	YES	Medium	3.OakForest	3
47	Young	Man	Urban	YES	Medium	3.OakForest	3
49	Senior	Woman	Urban	NO	Medium	3.OakForest	3
54	MiddleAged	Woman	Urban	NO	Medium	3.OakForest	3
55	MiddleAged	Man	Urban	NO	Medium	3.OakForest	3
65	MiddleAged	Woman	Urban	NO	Medium	3.OakForest	3
68	MiddleAged	Woman	Urban	NO	Medium	3.OakForest	3
73	MiddleAged	Man	Urban	YES	Medium	3.OakForest	3
74	MiddleAged	Woman	Urban	YES	Medium	3.OakForest	3
75	Young	Woman	Urban	NO	Medium	3.OakForest	3
76	MiddleAged	Woman	Urban	NO	Medium	3.OakForest	3
78	MiddleAged	Woman	Urban	NO	Medium	3.OakForest	3
82	MiddleAged	Man	Urban	YES	Medium	3.OakForest	3
84	Senior	Man	Urban	NO	Medium	3.OakForest	3
90	MiddleAged	Woman	Urban	NO	Medium	3.OakForest	3
92	MiddleAged	Man	Urban	YES	Medium	3.OakForest	3
98	Young	Man	Urban	NO	Medium	3.OakForest	3
100	MiddleAged	Man	Urban	NO	Medium	3.OakForest	3
102	Senior	Woman	Urban	YES	Medium	3.OakForest	3
103	Young	Woman	Urban	YES	Medium	3.OakForest	3
106	MiddleAged	Man	Urban	NO	Medium	3.OakForest	3
113	Senior	Woman	Urban	NO	Medium	3.OakForest	3
114	Young	Woman	Urban	NO	Medium	3.OakForest	3
117	MiddleAged	Man	Urban	NO	Medium	3.OakForest	3
123	Young	Man	Urban	YES	Medium	3.OakForest	3
124	MiddleAged	Woman	Urban	NO	Medium	3.OakForest	3
126	MiddleAged	Man	Urban	YES	Medium	3.OakForest	3
130	Young	Woman	Urban	YES	Medium	3.OakForest	3
132	Young	Man	Urban	YES	Medium	3.OakForest	3
134	MiddleAged	Woman	Urban	YES	Medium	3.OakForest	3
135	Senior	Man	Urban	YES	Medium	3.OakForest	3
139	Senior	Man	Urban	NO	Medium	3.OakForest	3
149	MiddleAged	Woman	Urban	NO	Medium	3.OakForest	3
151	MiddleAged	Woman	Urban	NO	Medium	3.OakForest	3
157	MiddleAged	Woman	Urban	YES	Medium	3.OakForest	3
160	MiddleAged	Man	Urban	NO	Medium	3.OakForest	3
162	MiddleAged	Woman	Urban	NO	Medium	3.OakForest	3
163	Senior	Woman	Urban	NO	Medium	3.OakForest	3
169	MiddleAged	Woman	Urban	NO	Medium	3.OakForest	3
170	MiddleAged	Woman	Urban	YES	Medium	3.OakForest	3
172	MiddleAged	Woman	Urban	YES	Medium	3.OakForest	3
175	MiddleAged	Woman	Urban	NO	Medium	3.OakForest	3
177	MiddleAged	Man	Urban	NO	Medium	3.OakForest	3
181	Senior	Man	Urban	NO	Medium	3.OakForest	3
182	MiddleAged	Man	Urban	NO	Medium	3.OakForest	3
184	MiddleAged	Man	Urban	NO	Medium	3.OakForest	3
188	MiddleAged	Man	Urban	YES	Medium	3.OakForest	3
191	MiddleAged	Woman	Urban	YES	Medium	3.OakForest	3
192	Young	Man	Urban	YES	Medium	3.OakForest	3
195	MiddleAged	Woman	Urban	NO	Medium	3.OakForest	3
198	MiddleAged	Man	Urban	YES	Medium	3.OakForest	3
201	Senior	Woman	Urban	YES	Medium	3.OakForest	3
205	Young	Man	Urban	NO	Medium	3.OakForest	3
206	MiddleAged	Woman	Urban	NO	Medium	3.OakForest	3
212	MiddleAged	Woman	Urban	NO	Medium	3.OakForest	3
214	MiddleAged	Man	Urban	NO	Medium	3.OakForest	3
216	MiddleAged	Woman	Urban	NO	Medium	3.OakForest	3
217	MiddleAged	Man	Urban	YES	Medium	3.OakForest	3
223	MiddleAged	Man	Urban	NO	Medium	3.OakForest	3
226	Young	Man	Urban	YES	Medium	3.OakForest	3
230	MiddleAged	Woman	Urban	NO	Medium	3.OakForest	3
232	Young	Man	Urban	YES	Medium	3.OakForest	3
236	MiddleAged	Man	Urban	NO	Medium	3.OakForest	3
237	MiddleAged	Woman	Urban	NO	Medium	3.OakForest	3
239	MiddleAged	Man	Urban	NO	Medium	3.OakForest	3
244	Young	Man	Urban	NO	Medium	3.OakForest	3
245	MiddleAged	Woman	Urban	YES	Medium	3.OakForest	3
249	MiddleAged	Man	Urban	YES	Medium	3.OakForest	3
251	MiddleAged	Woman	Urban	NO	Medium	3.OakForest	3
252	Senior	Woman	Urban	YES	Medium	3.OakForest	3
254	MiddleAged	Woman	Urban	NO	Medium	3.OakForest	3
257	MiddleAged	Woman	Urban	NO	Medium	3.OakForest	3
264	MiddleAged	Man	Urban	NO	Medium	3.OakForest	3
267	MiddleAged	Man	Urban	NO	Medium	3.OakForest	3
270	Young	Woman	Urban	NO	Medium	3.OakForest	3
274	MiddleAged	Man	Urban	NO	Medium	3.OakForest	3
279	Young	Woman	Urban	YES	Medium	3.OakForest	3
280	Young	Woman	Urban	YES	Medium	3.OakForest	3
283	Young	Woman	Urban	YES	Medium	3.OakForest	3
284	MiddleAged	Woman	Urban	NO	Medium	3.OakForest	3
290	Young	Man	Urban	YES	Medium	3.OakForest	3
291	MiddleAged	Man	Urban	NO	Medium	3.OakForest	3
295	Senior	Woman	Urban	YES	Medium	3.OakForest	3
297	MiddleAged	Man	Urban	YES	Medium	3.OakForest	3
301	MiddleAged	Man	Urban	NO	Medium	3.OakForest	3
302	MiddleAged	Woman	Urban	YES	Medium	3.OakForest	3
315	MiddleAged	Man	Urban	NO	Medium	3.OakForest	3
317	Senior	Woman	Urban	NO	Medium	3.OakForest	3
318	MiddleAged	Woman	Urban	YES	Medium	3.OakForest	3
321	Senior	Man	Urban	NO	Medium	3.OakForest	3
325	MiddleAged	Man	Urban	NO	Medium	3.OakForest	3
328	MiddleAged	Woman	Urban	YES	Medium	3.OakForest	3
330	MiddleAged	Woman	Urban	NO	Medium	3.OakForest	3
333	MiddleAged	Woman	Urban	NO	Medium	3.OakForest	3
336	MiddleAged	Woman	Urban	YES	Medium	3.OakForest	3
337	MiddleAged	Woman	Urban	NO	Medium	3.OakForest	3
340	MiddleAged	Woman	Urban	NO	Medium	3.OakForest	3
344	MiddleAged	Woman	Urban	NO	Medium	3.OakForest	3
36	MiddleAged	Woman	Urban	YES	Medium	3.OakForest	2
60	Senior	Woman	Urban	NO	Medium	3.OakForest	2
70	MiddleAged	Woman	Urban	NO	Medium	3.OakForest	2
79	MiddleAged	Man	Urban	NO	Medium	3.OakForest	2
95	Young	Woman	Urban	NO	Medium	3.OakForest	2
96	MiddleAged	Woman	Urban	NO	Medium	3.OakForest	2
119	MiddleAged	Woman	Urban	NO	Medium	3.OakForest	2
121	MiddleAged	Woman	Urban	NO	Medium	3.OakForest	2
143	MiddleAged	Man	Urban	NO	Medium	3.OakForest	2
146	MiddleAged	Woman	Urban	NO	Medium	3.OakForest	2
155	MiddleAged	Man	Urban	YES	Medium	3.OakForest	2
159	MiddleAged	Woman	Urban	NO	Medium	3.OakForest	2
168	MiddleAged	Woman	Urban	NO	Medium	3.OakForest	2
187	Senior	Woman	Urban	NO	Medium	3.OakForest	2
250	MiddleAged	Man	Urban	NO	Medium	3.OakForest	2
255	MiddleAged	Man	Urban	YES	Medium	3.OakForest	2
298	Young	Man	Urban	NO	Medium	3.OakForest	2
313	MiddleAged	Man	Urban	NO	Medium	3.OakForest	2
17	Senior	Woman	Rural	NO	Medium	3.OakForest	3
32	Senior	Woman	Rural	NO	Medium	3.OakForest	3
39	MiddleAged	Man	Rural	NO	Medium	3.OakForest	3
43	MiddleAged	Man	Rural	NO	Medium	3.OakForest	3
48	MiddleAged	Man	Rural	NO	Medium	3.OakForest	3
64	MiddleAged	Woman	Rural	YES	Medium	3.OakForest	3
89	Young	Woman	Rural	NO	Medium	3.OakForest	3
101	Senior	Man	Rural	NO	Medium	3.OakForest	3
105	Senior	Woman	Rural	YES	Medium	3.OakForest	3
127	Senior	Woman	Rural	YES	Medium	3.OakForest	3
138	Senior	Woman	Rural	YES	Medium	3.OakForest	3
140	MiddleAged	Man	Rural	YES	Medium	3.OakForest	3
161	MiddleAged	Woman	Rural	YES	Medium	3.OakForest	3
186	MiddleAged	Woman	Rural	YES	Medium	3.OakForest	3
197	MiddleAged	Man	Rural	YES	Medium	3.OakForest	3
199	Young	Woman	Rural	YES	Medium	3.OakForest	3
203	Senior	Man	Rural	YES	Medium	3.OakForest	3
204	MiddleAged	Woman	Rural	YES	Medium	3.OakForest	3
209	Senior	Man	Rural	YES	Medium	3.OakForest	3
218	MiddleAged	Woman	Rural	YES	Medium	3.OakForest	3
227	Senior	Woman	Rural	YES	Medium	3.OakForest	3
246	Senior	Woman	Rural	NO	Medium	3.OakForest	3
285	MiddleAged	Woman	Rural	YES	Medium	3.OakForest	3
296	Senior	Woman	Rural	YES	Medium	3.OakForest	3
305	MiddleAged	Woman	Rural	YES	Medium	3.OakForest	3
306	Senior	Man	Rural	YES	Medium	3.OakForest	3
309	MiddleAged	Man	Rural	YES	Medium	3.OakForest	3
310	MiddleAged	Woman	Rural	YES	Medium	3.OakForest	3
311	Young	Woman	Rural	YES	Medium	3.OakForest	3
320	MiddleAged	Woman	Rural	YES	Medium	3.OakForest	3
322	Senior	Woman	Rural	NO	Medium	3.OakForest	3
335	MiddleAged	Woman	Rural	YES	Medium	3.OakForest	3
343	Senior	Woman	Rural	YES	Medium	3.OakForest	3
28	Young	Man	Rural	YES	Medium	3.OakForest	2
57	MiddleAged	Man	Rural	NO	Medium	3.OakForest	2
111	MiddleAged	Woman	Rural	YES	Medium	3.OakForest	2
220	Senior	Woman	Rural	YES	Medium	3.OakForest	2
277	Senior	Man	Rural	YES	Medium	3.OakForest	2
1	MiddleAged	Woman	Urban	NO	Medium	3.Eucalypt Pl.	3
9	Young	Woman	Urban	YES	Medium	3.Eucalypt Pl.	3
14	MiddleAged	Woman	Urban	YES	Medium	3.Eucalypt Pl.	3
18	Young	Man	Urban	YES	Medium	3.Eucalypt Pl.	3
23	MiddleAged	Man	Urban	YES	Medium	3.Eucalypt Pl.	3
31	MiddleAged	Woman	Urban	NO	Medium	3.Eucalypt Pl.	3
35	MiddleAged	Woman	Urban	YES	Medium	3.Eucalypt Pl.	3
65	MiddleAged	Woman	Urban	NO	Medium	3.Eucalypt Pl.	3
74	MiddleAged	Woman	Urban	YES	Medium	3.Eucalypt Pl.	3
76	MiddleAged	Woman	Urban	NO	Medium	3.Eucalypt Pl.	3
84	Senior	Man	Urban	NO	Medium	3.Eucalypt Pl.	3
98	Young	Man	Urban	NO	Medium	3.Eucalypt Pl.	3
106	MiddleAged	Man	Urban	NO	Medium	3.Eucalypt Pl.	3
117	MiddleAged	Man	Urban	NO	Medium	3.Eucalypt Pl.	3
123	Young	Man	Urban	YES	Medium	3.Eucalypt Pl.	3
126	MiddleAged	Man	Urban	YES	Medium	3.Eucalypt Pl.	3
135	Senior	Man	Urban	YES	Medium	3.Eucalypt Pl.	3
151	MiddleAged	Woman	Urban	NO	Medium	3.Eucalypt Pl.	3
163	Senior	Woman	Urban	NO	Medium	3.Eucalypt Pl.	3
169	MiddleAged	Woman	Urban	NO	Medium	3.Eucalypt Pl.	3
175	MiddleAged	Woman	Urban	NO	Medium	3.Eucalypt Pl.	3
177	MiddleAged	Man	Urban	NO	Medium	3.Eucalypt Pl.	3
181	Senior	Man	Urban	NO	Medium	3.Eucalypt Pl.	3
195	MiddleAged	Woman	Urban	NO	Medium	3.Eucalypt Pl.	3
201	Senior	Woman	Urban	YES	Medium	3.Eucalypt Pl.	3
206	MiddleAged	Woman	Urban	NO	Medium	3.Eucalypt Pl.	3
214	MiddleAged	Man	Urban	NO	Medium	3.Eucalypt Pl.	3
217	MiddleAged	Man	Urban	YES	Medium	3.Eucalypt Pl.	3
230	MiddleAged	Woman	Urban	NO	Medium	3.Eucalypt Pl.	3
232	Young	Man	Urban	YES	Medium	3.Eucalypt Pl.	3
244	Young	Man	Urban	NO	Medium	3.Eucalypt Pl.	3
249	MiddleAged	Man	Urban	YES	Medium	3.Eucalypt Pl.	3
252	Senior	Woman	Urban	YES	Medium	3.Eucalypt Pl.	3
254	MiddleAged	Woman	Urban	NO	Medium	3.Eucalypt Pl.	3
264	MiddleAged	Man	Urban	NO	Medium	3.Eucalypt Pl.	3
267	MiddleAged	Man	Urban	NO	Medium	3.Eucalypt Pl.	3
274	MiddleAged	Man	Urban	NO	Medium	3.Eucalypt Pl.	3
279	Young	Woman	Urban	YES	Medium	3.Eucalypt Pl.	3
283	Young	Woman	Urban	YES	Medium	3.Eucalypt Pl.	3
284	MiddleAged	Woman	Urban	NO	Medium	3.Eucalypt Pl.	3
290	Young	Man	Urban	YES	Medium	3.Eucalypt Pl.	3
301	MiddleAged	Man	Urban	NO	Medium	3.Eucalypt Pl.	3
317	Senior	Woman	Urban	NO	Medium	3.Eucalypt Pl.	3
321	Senior	Man	Urban	NO	Medium	3.Eucalypt Pl.	3
330	MiddleAged	Woman	Urban	NO	Medium	3.Eucalypt Pl.	3
336	MiddleAged	Woman	Urban	YES	Medium	3.Eucalypt Pl.	3
337	MiddleAged	Woman	Urban	NO	Medium	3.Eucalypt Pl.	3
344	MiddleAged	Woman	Urban	NO	Medium	3.Eucalypt Pl.	3
6	Young	Woman	Urban	YES	Medium	3.Eucalypt Pl.	2
11	MiddleAged	Man	Urban	YES	Medium	3.Eucalypt Pl.	2
24	MiddleAged	Woman	Urban	YES	Medium	3.Eucalypt Pl.	2
36	MiddleAged	Woman	Urban	YES	Medium	3.Eucalypt Pl.	2
46	MiddleAged	Woman	Urban	YES	Medium	3.Eucalypt Pl.	2
47	Young	Man	Urban	YES	Medium	3.Eucalypt Pl.	2
49	Senior	Woman	Urban	NO	Medium	3.Eucalypt Pl.	2
55	MiddleAged	Man	Urban	NO	Medium	3.Eucalypt Pl.	2
60	Senior	Woman	Urban	NO	Medium	3.Eucalypt Pl.	2
68	MiddleAged	Woman	Urban	NO	Medium	3.Eucalypt Pl.	2
70	MiddleAged	Woman	Urban	NO	Medium	3.Eucalypt Pl.	2
79	MiddleAged	Man	Urban	NO	Medium	3.Eucalypt Pl.	2
82	MiddleAged	Man	Urban	YES	Medium	3.Eucalypt Pl.	2
92	MiddleAged	Man	Urban	YES	Medium	3.Eucalypt Pl.	2
95	Young	Woman	Urban	NO	Medium	3.Eucalypt Pl.	2
96	MiddleAged	Woman	Urban	NO	Medium	3.Eucalypt Pl.	2
102	Senior	Woman	Urban	YES	Medium	3.Eucalypt Pl.	2
103	Young	Woman	Urban	YES	Medium	3.Eucalypt Pl.	2
113	Senior	Woman	Urban	NO	Medium	3.Eucalypt Pl.	2
114	Young	Woman	Urban	NO	Medium	3.Eucalypt Pl.	2
119	MiddleAged	Woman	Urban	NO	Medium	3.Eucalypt Pl.	2
121	MiddleAged	Woman	Urban	NO	Medium	3.Eucalypt Pl.	2
130	Young	Woman	Urban	YES	Medium	3.Eucalypt Pl.	2
139	Senior	Man	Urban	NO	Medium	3.Eucalypt Pl.	2
143	MiddleAged	Man	Urban	NO	Medium	3.Eucalypt Pl.	2
146	MiddleAged	Woman	Urban	NO	Medium	3.Eucalypt Pl.	2
149	MiddleAged	Woman	Urban	NO	Medium	3.Eucalypt Pl.	2
155	MiddleAged	Man	Urban	YES	Medium	3.Eucalypt Pl.	2
157	MiddleAged	Woman	Urban	YES	Medium	3.Eucalypt Pl.	2
162	MiddleAged	Woman	Urban	NO	Medium	3.Eucalypt Pl.	2
168	MiddleAged	Woman	Urban	NO	Medium	3.Eucalypt Pl.	2
170	MiddleAged	Woman	Urban	YES	Medium	3.Eucalypt Pl.	2
172	MiddleAged	Woman	Urban	YES	Medium	3.Eucalypt Pl.	2
184	MiddleAged	Man	Urban	NO	Medium	3.Eucalypt Pl.	2
188	MiddleAged	Man	Urban	YES	Medium	3.Eucalypt Pl.	2
192	Young	Man	Urban	YES	Medium	3.Eucalypt Pl.	2
212	MiddleAged	Woman	Urban	NO	Medium	3.Eucalypt Pl.	2
223	MiddleAged	Man	Urban	NO	Medium	3.Eucalypt Pl.	2
237	MiddleAged	Woman	Urban	NO	Medium	3.Eucalypt Pl.	2
245	MiddleAged	Woman	Urban	YES	Medium	3.Eucalypt Pl.	2
250	MiddleAged	Man	Urban	NO	Medium	3.Eucalypt Pl.	2
255	MiddleAged	Man	Urban	YES	Medium	3.Eucalypt Pl.	2
257	MiddleAged	Woman	Urban	NO	Medium	3.Eucalypt Pl.	2
270	Young	Woman	Urban	NO	Medium	3.Eucalypt Pl.	2
280	Young	Woman	Urban	YES	Medium	3.Eucalypt Pl.	2
291	MiddleAged	Man	Urban	NO	Medium	3.Eucalypt Pl.	2
295	Senior	Woman	Urban	YES	Medium	3.Eucalypt Pl.	2
297	MiddleAged	Man	Urban	YES	Medium	3.Eucalypt Pl.	2
298	Young	Man	Urban	NO	Medium	3.Eucalypt Pl.	2
313	MiddleAged	Man	Urban	NO	Medium	3.Eucalypt Pl.	2
315	MiddleAged	Man	Urban	NO	Medium	3.Eucalypt Pl.	2
318	MiddleAged	Woman	Urban	YES	Medium	3.Eucalypt Pl.	2
325	MiddleAged	Man	Urban	NO	Medium	3.Eucalypt Pl.	2
328	MiddleAged	Woman	Urban	YES	Medium	3.Eucalypt Pl.	2
333	MiddleAged	Woman	Urban	NO	Medium	3.Eucalypt Pl.	2
3	MiddleAged	Man	Urban	YES	Medium	3.Eucalypt Pl.	1
15	MiddleAged	Woman	Urban	YES	Medium	3.Eucalypt Pl.	1
20	MiddleAged	Woman	Urban	NO	Medium	3.Eucalypt Pl.	1
25	MiddleAged	Man	Urban	NO	Medium	3.Eucalypt Pl.	1
37	MiddleAged	Man	Urban	NO	Medium	3.Eucalypt Pl.	1
42	MiddleAged	Man	Urban	YES	Medium	3.Eucalypt Pl.	1
54	MiddleAged	Woman	Urban	NO	Medium	3.Eucalypt Pl.	1
73	MiddleAged	Man	Urban	YES	Medium	3.Eucalypt Pl.	1
75	Young	Woman	Urban	NO	Medium	3.Eucalypt Pl.	1
78	MiddleAged	Woman	Urban	NO	Medium	3.Eucalypt Pl.	1
90	MiddleAged	Woman	Urban	NO	Medium	3.Eucalypt Pl.	1
100	MiddleAged	Man	Urban	NO	Medium	3.Eucalypt Pl.	1
124	MiddleAged	Woman	Urban	NO	Medium	3.Eucalypt Pl.	1
132	Young	Man	Urban	YES	Medium	3.Eucalypt Pl.	1
134	MiddleAged	Woman	Urban	YES	Medium	3.Eucalypt Pl.	1
159	MiddleAged	Woman	Urban	NO	Medium	3.Eucalypt Pl.	1
160	MiddleAged	Man	Urban	NO	Medium	3.Eucalypt Pl.	1
182	MiddleAged	Man	Urban	NO	Medium	3.Eucalypt Pl.	1
187	Senior	Woman	Urban	NO	Medium	3.Eucalypt Pl.	1
191	MiddleAged	Woman	Urban	YES	Medium	3.Eucalypt Pl.	1
198	MiddleAged	Man	Urban	YES	Medium	3.Eucalypt Pl.	1
205	Young	Man	Urban	NO	Medium	3.Eucalypt Pl.	1
216	MiddleAged	Woman	Urban	NO	Medium	3.Eucalypt Pl.	1
226	Young	Man	Urban	YES	Medium	3.Eucalypt Pl.	1
236	MiddleAged	Man	Urban	NO	Medium	3.Eucalypt Pl.	1
239	MiddleAged	Man	Urban	NO	Medium	3.Eucalypt Pl.	1
251	MiddleAged	Woman	Urban	NO	Medium	3.Eucalypt Pl.	1
302	MiddleAged	Woman	Urban	YES	Medium	3.Eucalypt Pl.	1
340	MiddleAged	Woman	Urban	NO	Medium	3.Eucalypt Pl.	1
17	Senior	Woman	Rural	NO	Medium	3.Eucalypt Pl.	3
32	Senior	Woman	Rural	NO	Medium	3.Eucalypt Pl.	3
57	MiddleAged	Man	Rural	NO	Medium	3.Eucalypt Pl.	3
64	MiddleAged	Woman	Rural	YES	Medium	3.Eucalypt Pl.	3
101	Senior	Man	Rural	NO	Medium	3.Eucalypt Pl.	3
186	MiddleAged	Woman	Rural	YES	Medium	3.Eucalypt Pl.	3
199	Young	Woman	Rural	YES	Medium	3.Eucalypt Pl.	3
246	Senior	Woman	Rural	NO	Medium	3.Eucalypt Pl.	3
285	MiddleAged	Woman	Rural	YES	Medium	3.Eucalypt Pl.	3
296	Senior	Woman	Rural	YES	Medium	3.Eucalypt Pl.	3
309	MiddleAged	Man	Rural	YES	Medium	3.Eucalypt Pl.	3
322	Senior	Woman	Rural	NO	Medium	3.Eucalypt Pl.	3
335	MiddleAged	Woman	Rural	YES	Medium	3.Eucalypt Pl.	3
343	Senior	Woman	Rural	YES	Medium	3.Eucalypt Pl.	3
28	Young	Man	Rural	YES	Medium	3.Eucalypt Pl.	2
48	MiddleAged	Man	Rural	NO	Medium	3.Eucalypt Pl.	2
89	Young	Woman	Rural	NO	Medium	3.Eucalypt Pl.	2
111	MiddleAged	Woman	Rural	YES	Medium	3.Eucalypt Pl.	2
140	MiddleAged	Man	Rural	YES	Medium	3.Eucalypt Pl.	2
197	MiddleAged	Man	Rural	YES	Medium	3.Eucalypt Pl.	2
203	Senior	Man	Rural	YES	Medium	3.Eucalypt Pl.	2
204	MiddleAged	Woman	Rural	YES	Medium	3.Eucalypt Pl.	2
209	Senior	Man	Rural	YES	Medium	3.Eucalypt Pl.	2
218	MiddleAged	Woman	Rural	YES	Medium	3.Eucalypt Pl.	2
220	Senior	Woman	Rural	YES	Medium	3.Eucalypt Pl.	2
277	Senior	Man	Rural	YES	Medium	3.Eucalypt Pl.	2
305	MiddleAged	Woman	Rural	YES	Medium	3.Eucalypt Pl.	2
306	Senior	Man	Rural	YES	Medium	3.Eucalypt Pl.	2
310	MiddleAged	Woman	Rural	YES	Medium	3.Eucalypt Pl.	2
311	Young	Woman	Rural	YES	Medium	3.Eucalypt Pl.	2
39	MiddleAged	Man	Rural	NO	Medium	3.Eucalypt Pl.	1
43	MiddleAged	Man	Rural	NO	Medium	3.Eucalypt Pl.	1
105	Senior	Woman	Rural	YES	Medium	3.Eucalypt Pl.	1
127	Senior	Woman	Rural	YES	Medium	3.Eucalypt Pl.	1
138	Senior	Woman	Rural	YES	Medium	3.Eucalypt Pl.	1
161	MiddleAged	Woman	Rural	YES	Medium	3.Eucalypt Pl.	1
227	Senior	Woman	Rural	YES	Medium	3.Eucalypt Pl.	1
320	MiddleAged	Woman	Rural	YES	Medium	3.Eucalypt Pl.	1
1	MiddleAged	Woman	Urban	NO	Medium	3.Mixed For.	3
11	MiddleAged	Man	Urban	YES	Medium	3.Mixed For.	3
14	MiddleAged	Woman	Urban	YES	Medium	3.Mixed For.	3
31	MiddleAged	Woman	Urban	NO	Medium	3.Mixed For.	3
35	MiddleAged	Woman	Urban	YES	Medium	3.Mixed For.	3
37	MiddleAged	Man	Urban	NO	Medium	3.Mixed For.	3
42	MiddleAged	Man	Urban	YES	Medium	3.Mixed For.	3
55	MiddleAged	Man	Urban	NO	Medium	3.Mixed For.	3
65	MiddleAged	Woman	Urban	NO	Medium	3.Mixed For.	3
73	MiddleAged	Man	Urban	YES	Medium	3.Mixed For.	3
76	MiddleAged	Woman	Urban	NO	Medium	3.Mixed For.	3
82	MiddleAged	Man	Urban	YES	Medium	3.Mixed For.	3
84	Senior	Man	Urban	NO	Medium	3.Mixed For.	3
92	MiddleAged	Man	Urban	YES	Medium	3.Mixed For.	3
98	Young	Man	Urban	NO	Medium	3.Mixed For.	3
117	MiddleAged	Man	Urban	NO	Medium	3.Mixed For.	3
132	Young	Man	Urban	YES	Medium	3.Mixed For.	3
149	MiddleAged	Woman	Urban	NO	Medium	3.Mixed For.	3
151	MiddleAged	Woman	Urban	NO	Medium	3.Mixed For.	3
169	MiddleAged	Woman	Urban	NO	Medium	3.Mixed For.	3
175	MiddleAged	Woman	Urban	NO	Medium	3.Mixed For.	3
177	MiddleAged	Man	Urban	NO	Medium	3.Mixed For.	3
181	Senior	Man	Urban	NO	Medium	3.Mixed For.	3
214	MiddleAged	Man	Urban	NO	Medium	3.Mixed For.	3
223	MiddleAged	Man	Urban	NO	Medium	3.Mixed For.	3
226	Young	Man	Urban	YES	Medium	3.Mixed For.	3
232	Young	Man	Urban	YES	Medium	3.Mixed For.	3
249	MiddleAged	Man	Urban	YES	Medium	3.Mixed For.	3
251	MiddleAged	Woman	Urban	NO	Medium	3.Mixed For.	3
270	Young	Woman	Urban	NO	Medium	3.Mixed For.	3
274	MiddleAged	Man	Urban	NO	Medium	3.Mixed For.	3
279	Young	Woman	Urban	YES	Medium	3.Mixed For.	3
283	Young	Woman	Urban	YES	Medium	3.Mixed For.	3
295	Senior	Woman	Urban	YES	Medium	3.Mixed For.	3
317	Senior	Woman	Urban	NO	Medium	3.Mixed For.	3
318	MiddleAged	Woman	Urban	YES	Medium	3.Mixed For.	3
321	Senior	Man	Urban	NO	Medium	3.Mixed For.	3
340	MiddleAged	Woman	Urban	NO	Medium	3.Mixed For.	3
3	MiddleAged	Man	Urban	YES	Medium	3.Mixed For.	2
6	Young	Woman	Urban	YES	Medium	3.Mixed For.	2
9	Young	Woman	Urban	YES	Medium	3.Mixed For.	2
15	MiddleAged	Woman	Urban	YES	Medium	3.Mixed For.	2
18	Young	Man	Urban	YES	Medium	3.Mixed For.	2
20	MiddleAged	Woman	Urban	NO	Medium	3.Mixed For.	2
24	MiddleAged	Woman	Urban	YES	Medium	3.Mixed For.	2
25	MiddleAged	Man	Urban	NO	Medium	3.Mixed For.	2
36	MiddleAged	Woman	Urban	YES	Medium	3.Mixed For.	2
46	MiddleAged	Woman	Urban	YES	Medium	3.Mixed For.	2
47	Young	Man	Urban	YES	Medium	3.Mixed For.	2
49	Senior	Woman	Urban	NO	Medium	3.Mixed For.	2
54	MiddleAged	Woman	Urban	NO	Medium	3.Mixed For.	2
60	Senior	Woman	Urban	NO	Medium	3.Mixed For.	2
68	MiddleAged	Woman	Urban	NO	Medium	3.Mixed For.	2
74	MiddleAged	Woman	Urban	YES	Medium	3.Mixed For.	2
75	Young	Woman	Urban	NO	Medium	3.Mixed For.	2
78	MiddleAged	Woman	Urban	NO	Medium	3.Mixed For.	2
79	MiddleAged	Man	Urban	NO	Medium	3.Mixed For.	2
95	Young	Woman	Urban	NO	Medium	3.Mixed For.	2
96	MiddleAged	Woman	Urban	NO	Medium	3.Mixed For.	2
100	MiddleAged	Man	Urban	NO	Medium	3.Mixed For.	2
102	Senior	Woman	Urban	YES	Medium	3.Mixed For.	2
103	Young	Woman	Urban	YES	Medium	3.Mixed For.	2
106	MiddleAged	Man	Urban	NO	Medium	3.Mixed For.	2
113	Senior	Woman	Urban	NO	Medium	3.Mixed For.	2
119	MiddleAged	Woman	Urban	NO	Medium	3.Mixed For.	2
121	MiddleAged	Woman	Urban	NO	Medium	3.Mixed For.	2
123	Young	Man	Urban	YES	Medium	3.Mixed For.	2
124	MiddleAged	Woman	Urban	NO	Medium	3.Mixed For.	2
134	MiddleAged	Woman	Urban	YES	Medium	3.Mixed For.	2
135	Senior	Man	Urban	YES	Medium	3.Mixed For.	2
139	Senior	Man	Urban	NO	Medium	3.Mixed For.	2
146	MiddleAged	Woman	Urban	NO	Medium	3.Mixed For.	2
155	MiddleAged	Man	Urban	YES	Medium	3.Mixed For.	2
157	MiddleAged	Woman	Urban	YES	Medium	3.Mixed For.	2
159	MiddleAged	Woman	Urban	NO	Medium	3.Mixed For.	2
160	MiddleAged	Man	Urban	NO	Medium	3.Mixed For.	2
162	MiddleAged	Woman	Urban	NO	Medium	3.Mixed For.	2
163	Senior	Woman	Urban	NO	Medium	3.Mixed For.	2
170	MiddleAged	Woman	Urban	YES	Medium	3.Mixed For.	2
172	MiddleAged	Woman	Urban	YES	Medium	3.Mixed For.	2
182	MiddleAged	Man	Urban	NO	Medium	3.Mixed For.	2
184	MiddleAged	Man	Urban	NO	Medium	3.Mixed For.	2
187	Senior	Woman	Urban	NO	Medium	3.Mixed For.	2
188	MiddleAged	Man	Urban	YES	Medium	3.Mixed For.	2
195	MiddleAged	Woman	Urban	NO	Medium	3.Mixed For.	2
198	MiddleAged	Man	Urban	YES	Medium	3.Mixed For.	2
201	Senior	Woman	Urban	YES	Medium	3.Mixed For.	2
205	Young	Man	Urban	NO	Medium	3.Mixed For.	2
206	MiddleAged	Woman	Urban	NO	Medium	3.Mixed For.	2
212	MiddleAged	Woman	Urban	NO	Medium	3.Mixed For.	2
216	MiddleAged	Woman	Urban	NO	Medium	3.Mixed For.	2
217	MiddleAged	Man	Urban	YES	Medium	3.Mixed For.	2
230	MiddleAged	Woman	Urban	NO	Medium	3.Mixed For.	2
236	MiddleAged	Man	Urban	NO	Medium	3.Mixed For.	2
237	MiddleAged	Woman	Urban	NO	Medium	3.Mixed For.	2
239	MiddleAged	Man	Urban	NO	Medium	3.Mixed For.	2
244	Young	Man	Urban	NO	Medium	3.Mixed For.	2
245	MiddleAged	Woman	Urban	YES	Medium	3.Mixed For.	2
250	MiddleAged	Man	Urban	NO	Medium	3.Mixed For.	2
252	Senior	Woman	Urban	YES	Medium	3.Mixed For.	2
254	MiddleAged	Woman	Urban	NO	Medium	3.Mixed For.	2
255	MiddleAged	Man	Urban	YES	Medium	3.Mixed For.	2
257	MiddleAged	Woman	Urban	NO	Medium	3.Mixed For.	2
264	MiddleAged	Man	Urban	NO	Medium	3.Mixed For.	2
267	MiddleAged	Man	Urban	NO	Medium	3.Mixed For.	2
280	Young	Woman	Urban	YES	Medium	3.Mixed For.	2
284	MiddleAged	Woman	Urban	NO	Medium	3.Mixed For.	2
290	Young	Man	Urban	YES	Medium	3.Mixed For.	2
297	MiddleAged	Man	Urban	YES	Medium	3.Mixed For.	2
298	Young	Man	Urban	NO	Medium	3.Mixed For.	2
301	MiddleAged	Man	Urban	NO	Medium	3.Mixed For.	2
302	MiddleAged	Woman	Urban	YES	Medium	3.Mixed For.	2
313	MiddleAged	Man	Urban	NO	Medium	3.Mixed For.	2
315	MiddleAged	Man	Urban	NO	Medium	3.Mixed For.	2
325	MiddleAged	Man	Urban	NO	Medium	3.Mixed For.	2
328	MiddleAged	Woman	Urban	YES	Medium	3.Mixed For.	2
333	MiddleAged	Woman	Urban	NO	Medium	3.Mixed For.	2
336	MiddleAged	Woman	Urban	YES	Medium	3.Mixed For.	2
344	MiddleAged	Woman	Urban	NO	Medium	3.Mixed For.	2
23	MiddleAged	Man	Urban	YES	Medium	3.Mixed For.	1
70	MiddleAged	Woman	Urban	NO	Medium	3.Mixed For.	1
90	MiddleAged	Woman	Urban	NO	Medium	3.Mixed For.	1
114	Young	Woman	Urban	NO	Medium	3.Mixed For.	1
126	MiddleAged	Man	Urban	YES	Medium	3.Mixed For.	1
130	Young	Woman	Urban	YES	Medium	3.Mixed For.	1
143	MiddleAged	Man	Urban	NO	Medium	3.Mixed For.	1
168	MiddleAged	Woman	Urban	NO	Medium	3.Mixed For.	1
191	MiddleAged	Woman	Urban	YES	Medium	3.Mixed For.	1
192	Young	Man	Urban	YES	Medium	3.Mixed For.	1
291	MiddleAged	Man	Urban	NO	Medium	3.Mixed For.	1
330	MiddleAged	Woman	Urban	NO	Medium	3.Mixed For.	1
337	MiddleAged	Woman	Urban	NO	Medium	3.Mixed For.	1
17	Senior	Woman	Rural	NO	Medium	3.Mixed For.	3
64	MiddleAged	Woman	Rural	YES	Medium	3.Mixed For.	3
199	Young	Woman	Rural	YES	Medium	3.Mixed For.	3
246	Senior	Woman	Rural	NO	Medium	3.Mixed For.	3
285	MiddleAged	Woman	Rural	YES	Medium	3.Mixed For.	3
320	MiddleAged	Woman	Rural	YES	Medium	3.Mixed For.	3
343	Senior	Woman	Rural	YES	Medium	3.Mixed For.	3
28	Young	Man	Rural	YES	Medium	3.Mixed For.	2
32	Senior	Woman	Rural	NO	Medium	3.Mixed For.	2
39	MiddleAged	Man	Rural	NO	Medium	3.Mixed For.	2
43	MiddleAged	Man	Rural	NO	Medium	3.Mixed For.	2
48	MiddleAged	Man	Rural	NO	Medium	3.Mixed For.	2
57	MiddleAged	Man	Rural	NO	Medium	3.Mixed For.	2
89	Young	Woman	Rural	NO	Medium	3.Mixed For.	2
101	Senior	Man	Rural	NO	Medium	3.Mixed For.	2
105	Senior	Woman	Rural	YES	Medium	3.Mixed For.	2
111	MiddleAged	Woman	Rural	YES	Medium	3.Mixed For.	2
127	Senior	Woman	Rural	YES	Medium	3.Mixed For.	2
138	Senior	Woman	Rural	YES	Medium	3.Mixed For.	2
140	MiddleAged	Man	Rural	YES	Medium	3.Mixed For.	2
161	MiddleAged	Woman	Rural	YES	Medium	3.Mixed For.	2
186	MiddleAged	Woman	Rural	YES	Medium	3.Mixed For.	2
197	MiddleAged	Man	Rural	YES	Medium	3.Mixed For.	2
203	Senior	Man	Rural	YES	Medium	3.Mixed For.	2
204	MiddleAged	Woman	Rural	YES	Medium	3.Mixed For.	2
209	Senior	Man	Rural	YES	Medium	3.Mixed For.	2
218	MiddleAged	Woman	Rural	YES	Medium	3.Mixed For.	2
227	Senior	Woman	Rural	YES	Medium	3.Mixed For.	2
277	Senior	Man	Rural	YES	Medium	3.Mixed For.	2
296	Senior	Woman	Rural	YES	Medium	3.Mixed For.	2
306	Senior	Man	Rural	YES	Medium	3.Mixed For.	2
309	MiddleAged	Man	Rural	YES	Medium	3.Mixed For.	2
310	MiddleAged	Woman	Rural	YES	Medium	3.Mixed For.	2
311	Young	Woman	Rural	YES	Medium	3.Mixed For.	2
322	Senior	Woman	Rural	NO	Medium	3.Mixed For.	2
335	MiddleAged	Woman	Rural	YES	Medium	3.Mixed For.	2
220	Senior	Woman	Rural	YES	Medium	3.Mixed For.	1
305	MiddleAged	Woman	Rural	YES	Medium	3.Mixed For.	1
65	MiddleAged	Woman	Urban	NO	Medium	3.Shrubland	3
76	MiddleAged	Woman	Urban	NO	Medium	3.Shrubland	3
214	MiddleAged	Man	Urban	NO	Medium	3.Shrubland	3
226	Young	Man	Urban	YES	Medium	3.Shrubland	3
264	MiddleAged	Man	Urban	NO	Medium	3.Shrubland	3
1	MiddleAged	Woman	Urban	NO	Medium	3.Shrubland	2
6	Young	Woman	Urban	YES	Medium	3.Shrubland	2
9	Young	Woman	Urban	YES	Medium	3.Shrubland	2
11	MiddleAged	Man	Urban	YES	Medium	3.Shrubland	2
14	MiddleAged	Woman	Urban	YES	Medium	3.Shrubland	2
15	MiddleAged	Woman	Urban	YES	Medium	3.Shrubland	2
23	MiddleAged	Man	Urban	YES	Medium	3.Shrubland	2
24	MiddleAged	Woman	Urban	YES	Medium	3.Shrubland	2
25	MiddleAged	Man	Urban	NO	Medium	3.Shrubland	2
31	MiddleAged	Woman	Urban	NO	Medium	3.Shrubland	2
35	MiddleAged	Woman	Urban	YES	Medium	3.Shrubland	2
42	MiddleAged	Man	Urban	YES	Medium	3.Shrubland	2
54	MiddleAged	Woman	Urban	NO	Medium	3.Shrubland	2
70	MiddleAged	Woman	Urban	NO	Medium	3.Shrubland	2
74	MiddleAged	Woman	Urban	YES	Medium	3.Shrubland	2
75	Young	Woman	Urban	NO	Medium	3.Shrubland	2
78	MiddleAged	Woman	Urban	NO	Medium	3.Shrubland	2
82	MiddleAged	Man	Urban	YES	Medium	3.Shrubland	2
84	Senior	Man	Urban	NO	Medium	3.Shrubland	2
90	MiddleAged	Woman	Urban	NO	Medium	3.Shrubland	2
92	MiddleAged	Man	Urban	YES	Medium	3.Shrubland	2
96	MiddleAged	Woman	Urban	NO	Medium	3.Shrubland	2
100	MiddleAged	Man	Urban	NO	Medium	3.Shrubland	2
103	Young	Woman	Urban	YES	Medium	3.Shrubland	2
106	MiddleAged	Man	Urban	NO	Medium	3.Shrubland	2
114	Young	Woman	Urban	NO	Medium	3.Shrubland	2
123	Young	Man	Urban	YES	Medium	3.Shrubland	2
124	MiddleAged	Woman	Urban	NO	Medium	3.Shrubland	2
126	MiddleAged	Man	Urban	YES	Medium	3.Shrubland	2
130	Young	Woman	Urban	YES	Medium	3.Shrubland	2
132	Young	Man	Urban	YES	Medium	3.Shrubland	2
151	MiddleAged	Woman	Urban	NO	Medium	3.Shrubland	2
157	MiddleAged	Woman	Urban	YES	Medium	3.Shrubland	2
160	MiddleAged	Man	Urban	NO	Medium	3.Shrubland	2
162	MiddleAged	Woman	Urban	NO	Medium	3.Shrubland	2
169	MiddleAged	Woman	Urban	NO	Medium	3.Shrubland	2
170	MiddleAged	Woman	Urban	YES	Medium	3.Shrubland	2
172	MiddleAged	Woman	Urban	YES	Medium	3.Shrubland	2
175	MiddleAged	Woman	Urban	NO	Medium	3.Shrubland	2
181	Senior	Man	Urban	NO	Medium	3.Shrubland	2
182	MiddleAged	Man	Urban	NO	Medium	3.Shrubland	2
187	Senior	Woman	Urban	NO	Medium	3.Shrubland	2
192	Young	Man	Urban	YES	Medium	3.Shrubland	2
201	Senior	Woman	Urban	YES	Medium	3.Shrubland	2
205	Young	Man	Urban	NO	Medium	3.Shrubland	2
206	MiddleAged	Woman	Urban	NO	Medium	3.Shrubland	2
216	MiddleAged	Woman	Urban	NO	Medium	3.Shrubland	2
236	MiddleAged	Man	Urban	NO	Medium	3.Shrubland	2
237	MiddleAged	Woman	Urban	NO	Medium	3.Shrubland	2
244	Young	Man	Urban	NO	Medium	3.Shrubland	2
249	MiddleAged	Man	Urban	YES	Medium	3.Shrubland	2
250	MiddleAged	Man	Urban	NO	Medium	3.Shrubland	2
251	MiddleAged	Woman	Urban	NO	Medium	3.Shrubland	2
252	Senior	Woman	Urban	YES	Medium	3.Shrubland	2
254	MiddleAged	Woman	Urban	NO	Medium	3.Shrubland	2
257	MiddleAged	Woman	Urban	NO	Medium	3.Shrubland	2
270	Young	Woman	Urban	NO	Medium	3.Shrubland	2
274	MiddleAged	Man	Urban	NO	Medium	3.Shrubland	2
279	Young	Woman	Urban	YES	Medium	3.Shrubland	2
283	Young	Woman	Urban	YES	Medium	3.Shrubland	2
284	MiddleAged	Woman	Urban	NO	Medium	3.Shrubland	2
295	Senior	Woman	Urban	YES	Medium	3.Shrubland	2
313	MiddleAged	Man	Urban	NO	Medium	3.Shrubland	2
317	Senior	Woman	Urban	NO	Medium	3.Shrubland	2
318	MiddleAged	Woman	Urban	YES	Medium	3.Shrubland	2
321	Senior	Man	Urban	NO	Medium	3.Shrubland	2
328	MiddleAged	Woman	Urban	YES	Medium	3.Shrubland	2
330	MiddleAged	Woman	Urban	NO	Medium	3.Shrubland	2
337	MiddleAged	Woman	Urban	NO	Medium	3.Shrubland	2
340	MiddleAged	Woman	Urban	NO	Medium	3.Shrubland	2
344	MiddleAged	Woman	Urban	NO	Medium	3.Shrubland	2
3	MiddleAged	Man	Urban	YES	Medium	3.Shrubland	1
18	Young	Man	Urban	YES	Medium	3.Shrubland	1
20	MiddleAged	Woman	Urban	NO	Medium	3.Shrubland	1
36	MiddleAged	Woman	Urban	YES	Medium	3.Shrubland	1
37	MiddleAged	Man	Urban	NO	Medium	3.Shrubland	1
46	MiddleAged	Woman	Urban	YES	Medium	3.Shrubland	1
47	Young	Man	Urban	YES	Medium	3.Shrubland	1
49	Senior	Woman	Urban	NO	Medium	3.Shrubland	1
55	MiddleAged	Man	Urban	NO	Medium	3.Shrubland	1
60	Senior	Woman	Urban	NO	Medium	3.Shrubland	1
68	MiddleAged	Woman	Urban	NO	Medium	3.Shrubland	1
73	MiddleAged	Man	Urban	YES	Medium	3.Shrubland	1
79	MiddleAged	Man	Urban	NO	Medium	3.Shrubland	1
95	Young	Woman	Urban	NO	Medium	3.Shrubland	1
98	Young	Man	Urban	NO	Medium	3.Shrubland	1
102	Senior	Woman	Urban	YES	Medium	3.Shrubland	1
113	Senior	Woman	Urban	NO	Medium	3.Shrubland	1
117	MiddleAged	Man	Urban	NO	Medium	3.Shrubland	1
119	MiddleAged	Woman	Urban	NO	Medium	3.Shrubland	1
121	MiddleAged	Woman	Urban	NO	Medium	3.Shrubland	1
134	MiddleAged	Woman	Urban	YES	Medium	3.Shrubland	1
135	Senior	Man	Urban	YES	Medium	3.Shrubland	1
139	Senior	Man	Urban	NO	Medium	3.Shrubland	1
143	MiddleAged	Man	Urban	NO	Medium	3.Shrubland	1
146	MiddleAged	Woman	Urban	NO	Medium	3.Shrubland	1
149	MiddleAged	Woman	Urban	NO	Medium	3.Shrubland	1
155	MiddleAged	Man	Urban	YES	Medium	3.Shrubland	1
159	MiddleAged	Woman	Urban	NO	Medium	3.Shrubland	1
163	Senior	Woman	Urban	NO	Medium	3.Shrubland	1
168	MiddleAged	Woman	Urban	NO	Medium	3.Shrubland	1
177	MiddleAged	Man	Urban	NO	Medium	3.Shrubland	1
184	MiddleAged	Man	Urban	NO	Medium	3.Shrubland	1
188	MiddleAged	Man	Urban	YES	Medium	3.Shrubland	1
191	MiddleAged	Woman	Urban	YES	Medium	3.Shrubland	1
195	MiddleAged	Woman	Urban	NO	Medium	3.Shrubland	1
198	MiddleAged	Man	Urban	YES	Medium	3.Shrubland	1
212	MiddleAged	Woman	Urban	NO	Medium	3.Shrubland	1
217	MiddleAged	Man	Urban	YES	Medium	3.Shrubland	1
223	MiddleAged	Man	Urban	NO	Medium	3.Shrubland	1
230	MiddleAged	Woman	Urban	NO	Medium	3.Shrubland	1
232	Young	Man	Urban	YES	Medium	3.Shrubland	1
239	MiddleAged	Man	Urban	NO	Medium	3.Shrubland	1
245	MiddleAged	Woman	Urban	YES	Medium	3.Shrubland	1
255	MiddleAged	Man	Urban	YES	Medium	3.Shrubland	1
267	MiddleAged	Man	Urban	NO	Medium	3.Shrubland	1
280	Young	Woman	Urban	YES	Medium	3.Shrubland	1
290	Young	Man	Urban	YES	Medium	3.Shrubland	1
291	MiddleAged	Man	Urban	NO	Medium	3.Shrubland	1
297	MiddleAged	Man	Urban	YES	Medium	3.Shrubland	1
298	Young	Man	Urban	NO	Medium	3.Shrubland	1
301	MiddleAged	Man	Urban	NO	Medium	3.Shrubland	1
302	MiddleAged	Woman	Urban	YES	Medium	3.Shrubland	1
315	MiddleAged	Man	Urban	NO	Medium	3.Shrubland	1
325	MiddleAged	Man	Urban	NO	Medium	3.Shrubland	1
333	MiddleAged	Woman	Urban	NO	Medium	3.Shrubland	1
336	MiddleAged	Woman	Urban	YES	Medium	3.Shrubland	1
17	Senior	Woman	Rural	NO	Medium	3.Shrubland	3
28	Young	Man	Rural	YES	Medium	3.Shrubland	2
57	MiddleAged	Man	Rural	NO	Medium	3.Shrubland	2
101	Senior	Man	Rural	NO	Medium	3.Shrubland	2
105	Senior	Woman	Rural	YES	Medium	3.Shrubland	2
111	MiddleAged	Woman	Rural	YES	Medium	3.Shrubland	2
127	Senior	Woman	Rural	YES	Medium	3.Shrubland	2
138	Senior	Woman	Rural	YES	Medium	3.Shrubland	2
140	MiddleAged	Man	Rural	YES	Medium	3.Shrubland	2
186	MiddleAged	Woman	Rural	YES	Medium	3.Shrubland	2
197	MiddleAged	Man	Rural	YES	Medium	3.Shrubland	2
199	Young	Woman	Rural	YES	Medium	3.Shrubland	2
218	MiddleAged	Woman	Rural	YES	Medium	3.Shrubland	2
220	Senior	Woman	Rural	YES	Medium	3.Shrubland	2
227	Senior	Woman	Rural	YES	Medium	3.Shrubland	2
246	Senior	Woman	Rural	NO	Medium	3.Shrubland	2
277	Senior	Man	Rural	YES	Medium	3.Shrubland	2
285	MiddleAged	Woman	Rural	YES	Medium	3.Shrubland	2
296	Senior	Woman	Rural	YES	Medium	3.Shrubland	2
306	Senior	Man	Rural	YES	Medium	3.Shrubland	2
320	MiddleAged	Woman	Rural	YES	Medium	3.Shrubland	2
322	Senior	Woman	Rural	NO	Medium	3.Shrubland	2
335	MiddleAged	Woman	Rural	YES	Medium	3.Shrubland	2
343	Senior	Woman	Rural	YES	Medium	3.Shrubland	2
32	Senior	Woman	Rural	NO	Medium	3.Shrubland	1
39	MiddleAged	Man	Rural	NO	Medium	3.Shrubland	1
43	MiddleAged	Man	Rural	NO	Medium	3.Shrubland	1
48	MiddleAged	Man	Rural	NO	Medium	3.Shrubland	1
64	MiddleAged	Woman	Rural	YES	Medium	3.Shrubland	1
89	Young	Woman	Rural	NO	Medium	3.Shrubland	1
161	MiddleAged	Woman	Rural	YES	Medium	3.Shrubland	1
203	Senior	Man	Rural	YES	Medium	3.Shrubland	1
204	MiddleAged	Woman	Rural	YES	Medium	3.Shrubland	1
209	Senior	Man	Rural	YES	Medium	3.Shrubland	1
305	MiddleAged	Woman	Rural	YES	Medium	3.Shrubland	1
309	MiddleAged	Man	Rural	YES	Medium	3.Shrubland	1
310	MiddleAged	Woman	Rural	YES	Medium	3.Shrubland	1
311	Young	Woman	Rural	YES	Medium	3.Shrubland	1
1	MiddleAged	Woman	Urban	NO	Medium	3.Pine Pl.	3
6	Young	Woman	Urban	YES	Medium	3.Pine Pl.	3
9	Young	Woman	Urban	YES	Medium	3.Pine Pl.	3
11	MiddleAged	Man	Urban	YES	Medium	3.Pine Pl.	3
14	MiddleAged	Woman	Urban	YES	Medium	3.Pine Pl.	3
15	MiddleAged	Woman	Urban	YES	Medium	3.Pine Pl.	3
23	MiddleAged	Man	Urban	YES	Medium	3.Pine Pl.	3
24	MiddleAged	Woman	Urban	YES	Medium	3.Pine Pl.	3
25	MiddleAged	Man	Urban	NO	Medium	3.Pine Pl.	3
31	MiddleAged	Woman	Urban	NO	Medium	3.Pine Pl.	3
35	MiddleAged	Woman	Urban	YES	Medium	3.Pine Pl.	3
37	MiddleAged	Man	Urban	NO	Medium	3.Pine Pl.	3
42	MiddleAged	Man	Urban	YES	Medium	3.Pine Pl.	3
46	MiddleAged	Woman	Urban	YES	Medium	3.Pine Pl.	3
54	MiddleAged	Woman	Urban	NO	Medium	3.Pine Pl.	3
55	MiddleAged	Man	Urban	NO	Medium	3.Pine Pl.	3
60	Senior	Woman	Urban	NO	Medium	3.Pine Pl.	3
65	MiddleAged	Woman	Urban	NO	Medium	3.Pine Pl.	3
70	MiddleAged	Woman	Urban	NO	Medium	3.Pine Pl.	3
74	MiddleAged	Woman	Urban	YES	Medium	3.Pine Pl.	3
76	MiddleAged	Woman	Urban	NO	Medium	3.Pine Pl.	3
78	MiddleAged	Woman	Urban	NO	Medium	3.Pine Pl.	3
82	MiddleAged	Man	Urban	YES	Medium	3.Pine Pl.	3
84	Senior	Man	Urban	NO	Medium	3.Pine Pl.	3
90	MiddleAged	Woman	Urban	NO	Medium	3.Pine Pl.	3
100	MiddleAged	Man	Urban	NO	Medium	3.Pine Pl.	3
106	MiddleAged	Man	Urban	NO	Medium	3.Pine Pl.	3
114	Young	Woman	Urban	NO	Medium	3.Pine Pl.	3
123	Young	Man	Urban	YES	Medium	3.Pine Pl.	3
124	MiddleAged	Woman	Urban	NO	Medium	3.Pine Pl.	3
130	Young	Woman	Urban	YES	Medium	3.Pine Pl.	3
132	Young	Man	Urban	YES	Medium	3.Pine Pl.	3
134	MiddleAged	Woman	Urban	YES	Medium	3.Pine Pl.	3
149	MiddleAged	Woman	Urban	NO	Medium	3.Pine Pl.	3
151	MiddleAged	Woman	Urban	NO	Medium	3.Pine Pl.	3
157	MiddleAged	Woman	Urban	YES	Medium	3.Pine Pl.	3
159	MiddleAged	Woman	Urban	NO	Medium	3.Pine Pl.	3
160	MiddleAged	Man	Urban	NO	Medium	3.Pine Pl.	3
162	MiddleAged	Woman	Urban	NO	Medium	3.Pine Pl.	3
168	MiddleAged	Woman	Urban	NO	Medium	3.Pine Pl.	3
169	MiddleAged	Woman	Urban	NO	Medium	3.Pine Pl.	3
175	MiddleAged	Woman	Urban	NO	Medium	3.Pine Pl.	3
181	Senior	Man	Urban	NO	Medium	3.Pine Pl.	3
182	MiddleAged	Man	Urban	NO	Medium	3.Pine Pl.	3
188	MiddleAged	Man	Urban	YES	Medium	3.Pine Pl.	3
191	MiddleAged	Woman	Urban	YES	Medium	3.Pine Pl.	3
201	Senior	Woman	Urban	YES	Medium	3.Pine Pl.	3
205	Young	Man	Urban	NO	Medium	3.Pine Pl.	3
206	MiddleAged	Woman	Urban	NO	Medium	3.Pine Pl.	3
212	MiddleAged	Woman	Urban	NO	Medium	3.Pine Pl.	3
214	MiddleAged	Man	Urban	NO	Medium	3.Pine Pl.	3
216	MiddleAged	Woman	Urban	NO	Medium	3.Pine Pl.	3
226	Young	Man	Urban	YES	Medium	3.Pine Pl.	3
236	MiddleAged	Man	Urban	NO	Medium	3.Pine Pl.	3
237	MiddleAged	Woman	Urban	NO	Medium	3.Pine Pl.	3
239	MiddleAged	Man	Urban	NO	Medium	3.Pine Pl.	3
244	Young	Man	Urban	NO	Medium	3.Pine Pl.	3
249	MiddleAged	Man	Urban	YES	Medium	3.Pine Pl.	3
251	MiddleAged	Woman	Urban	NO	Medium	3.Pine Pl.	3
252	Senior	Woman	Urban	YES	Medium	3.Pine Pl.	3
254	MiddleAged	Woman	Urban	NO	Medium	3.Pine Pl.	3
257	MiddleAged	Woman	Urban	NO	Medium	3.Pine Pl.	3
264	MiddleAged	Man	Urban	NO	Medium	3.Pine Pl.	3
270	Young	Woman	Urban	NO	Medium	3.Pine Pl.	3
274	MiddleAged	Man	Urban	NO	Medium	3.Pine Pl.	3
279	Young	Woman	Urban	YES	Medium	3.Pine Pl.	3
283	Young	Woman	Urban	YES	Medium	3.Pine Pl.	3
284	MiddleAged	Woman	Urban	NO	Medium	3.Pine Pl.	3
295	Senior	Woman	Urban	YES	Medium	3.Pine Pl.	3
317	Senior	Woman	Urban	NO	Medium	3.Pine Pl.	3
318	MiddleAged	Woman	Urban	YES	Medium	3.Pine Pl.	3
321	Senior	Man	Urban	NO	Medium	3.Pine Pl.	3
325	MiddleAged	Man	Urban	NO	Medium	3.Pine Pl.	3
330	MiddleAged	Woman	Urban	NO	Medium	3.Pine Pl.	3
337	MiddleAged	Woman	Urban	NO	Medium	3.Pine Pl.	3
340	MiddleAged	Woman	Urban	NO	Medium	3.Pine Pl.	3
344	MiddleAged	Woman	Urban	NO	Medium	3.Pine Pl.	3
3	MiddleAged	Man	Urban	YES	Medium	3.Pine Pl.	2
18	Young	Man	Urban	YES	Medium	3.Pine Pl.	2
20	MiddleAged	Woman	Urban	NO	Medium	3.Pine Pl.	2
36	MiddleAged	Woman	Urban	YES	Medium	3.Pine Pl.	2
47	Young	Man	Urban	YES	Medium	3.Pine Pl.	2
49	Senior	Woman	Urban	NO	Medium	3.Pine Pl.	2
68	MiddleAged	Woman	Urban	NO	Medium	3.Pine Pl.	2
73	MiddleAged	Man	Urban	YES	Medium	3.Pine Pl.	2
79	MiddleAged	Man	Urban	NO	Medium	3.Pine Pl.	2
92	MiddleAged	Man	Urban	YES	Medium	3.Pine Pl.	2
95	Young	Woman	Urban	NO	Medium	3.Pine Pl.	2
96	MiddleAged	Woman	Urban	NO	Medium	3.Pine Pl.	2
98	Young	Man	Urban	NO	Medium	3.Pine Pl.	2
102	Senior	Woman	Urban	YES	Medium	3.Pine Pl.	2
103	Young	Woman	Urban	YES	Medium	3.Pine Pl.	2
113	Senior	Woman	Urban	NO	Medium	3.Pine Pl.	2
117	MiddleAged	Man	Urban	NO	Medium	3.Pine Pl.	2
119	MiddleAged	Woman	Urban	NO	Medium	3.Pine Pl.	2
121	MiddleAged	Woman	Urban	NO	Medium	3.Pine Pl.	2
126	MiddleAged	Man	Urban	YES	Medium	3.Pine Pl.	2
135	Senior	Man	Urban	YES	Medium	3.Pine Pl.	2
139	Senior	Man	Urban	NO	Medium	3.Pine Pl.	2
[truncated: 71 more rows]

## Sheet: Question 5
Survey Number	Age	SEX	Residence	Outdoor Activities	Educational level	Answer
304	Senior	Woman	Urban	NO	Low	More	1
1	MiddleAged	Woman	Urban	NO	Medium	Less	1
3	MiddleAged	Man	Urban	YES	Medium	Less	1
4	MiddleAged	Man	Rural	YES	High	Less	1
5	Senior	Woman	Rural	NO	Low	Less	1
6	Young	Woman	Urban	YES	Medium	Less	1
7	Senior	Woman	Rural	NO	Low	Less	1
8	Senior	Man	Urban	NO	Low	Less	1
9	Young	Woman	Urban	YES	Medium	Less	1
10	Young	Man	Urban	YES	High	Less	1
12	Senior	Man	Rural	YES	Low	Less	1
14	MiddleAged	Woman	Urban	YES	Medium	Less	1
15	MiddleAged	Woman	Urban	YES	Medium	Less	1
16	Young	Woman	Urban	YES	High	Less	1
17	Senior	Woman	Rural	NO	Medium	Less	1
18	Young	Man	Urban	YES	Medium	Less	1
19	Young	Woman	Rural	YES	High	Less	1
20	MiddleAged	Woman	Urban	NO	Medium	Less	1
21	MiddleAged	Man	Urban	NO	High	Less	1
22	Senior	Man	Urban	NO	Low	Less	1
23	MiddleAged	Man	Urban	YES	Medium	Less	1
24	MiddleAged	Woman	Urban	YES	Medium	Less	1
25	MiddleAged	Man	Urban	NO	Medium	Less	1
26	MiddleAged	Woman	Urban	NO	Low	Less	1
27	Young	Man	Urban	YES	High	Less	1
28	Young	Man	Rural	YES	Medium	Less	1
29	Young	Woman	Rural	YES	High	Less	1
30	Senior	Woman	Urban	NO	Low	Less	1
31	MiddleAged	Woman	Urban	NO	Medium	Less	1
32	Senior	Woman	Rural	NO	Medium	Less	1
33	Senior	Man	Rural	NO	Low	Less	1
34	Senior	Man	Rural	YES	Low	Less	1
35	MiddleAged	Woman	Urban	YES	Medium	Less	1
36	MiddleAged	Woman	Urban	YES	Medium	Less	1
38	Young	Woman	Urban	YES	High	Less	1
40	Young	Woman	Urban	YES	High	Less	1
41	Young	Woman	Urban	YES	High	Less	1
42	MiddleAged	Man	Urban	YES	Medium	Less	1
44	Senior	Woman	Rural	YES	Low	Less	1
45	MiddleAged	Woman	Urban	YES	Low	Less	1
46	MiddleAged	Woman	Urban	YES	Medium	Less	1
47	Young	Man	Urban	YES	Medium	Less	1
48	MiddleAged	Man	Rural	NO	Medium	Less	1
49	Senior	Woman	Urban	NO	Medium	Less	1
50	Senior	Woman	Rural	NO	Low	Less	1
51	Senior	Man	Rural	NO	Low	Less	1
52	Senior	Woman	Rural	NO	Low	Less	1
54	MiddleAged	Woman	Urban	NO	Medium	Less	1
55	MiddleAged	Man	Urban	NO	Medium	Less	1
57	MiddleAged	Man	Rural	NO	Medium	Less	1
58	MiddleAged	Woman	Urban	YES	Low	Less	1
59	Senior	Woman	Urban	NO	Low	Less	1
60	Senior	Woman	Urban	NO	Medium	Less	1
62	Senior	Man	Rural	NO	Low	Less	1
63	MiddleAged	Man	Urban	YES	High	Less	1
65	MiddleAged	Woman	Urban	NO	Medium	Less	1
66	MiddleAged	Woman	Urban	NO	High	Less	1
67	MiddleAged	Man	Urban	YES	Low	Less	1
70	MiddleAged	Woman	Urban	NO	Medium	Less	1
72	Young	Man	Urban	NO	High	Less	1
73	MiddleAged	Man	Urban	YES	Medium	Less	1
74	MiddleAged	Woman	Urban	YES	Medium	Less	1
75	Young	Woman	Urban	NO	Medium	Less	1
76	MiddleAged	Woman	Urban	NO	Medium	Less	1
77	Senior	Man	Rural	YES	Low	Less	1
78	MiddleAged	Woman	Urban	NO	Medium	Less	1
79	MiddleAged	Man	Urban	NO	Medium	Less	1
81	MiddleAged	Man	Urban	NO	Low	Less	1
82	MiddleAged	Man	Urban	YES	Medium	Less	1
83	Young	Woman	Urban	YES	High	Less	1
84	Senior	Man	Urban	NO	Medium	Less	1
85	Young	Woman	Urban	YES	High	Less	1
87	Senior	Man	Rural	NO	Low	Less	1
88	MiddleAged	Woman	Urban	YES	High	Less	1
90	MiddleAged	Woman	Urban	NO	Medium	Less	1
91	Senior	Man	Urban	NO	Low	Less	1
92	MiddleAged	Man	Urban	YES	Medium	Less	1
93	Senior	Woman	Rural	YES	Low	Less	1
95	Young	Woman	Urban	NO	Medium	Less	1
96	MiddleAged	Woman	Urban	NO	Medium	Less	1
97	Young	Woman	Urban	YES	High	Less	1
98	Young	Man	Urban	NO	Medium	Less	1
99	Senior	Man	Urban	NO	Low	Less	1
100	MiddleAged	Man	Urban	NO	Medium	Less	1
101	Senior	Man	Rural	NO	Medium	Less	1
103	Young	Woman	Urban	YES	Medium	Less	1
104	MiddleAged	Man	Urban	YES	High	Less	1
105	Senior	Woman	Rural	YES	Medium	Less	1
107	MiddleAged	Man	Rural	YES	High	Less	1
108	Young	Man	Urban	YES	High	Less	1
109	Senior	Woman	Rural	YES	Low	Less	1
111	MiddleAged	Woman	Rural	YES	Medium	Less	1
112	Senior	Man	Urban	NO	Low	Less	1
113	Senior	Woman	Urban	NO	Medium	Less	1
114	Young	Woman	Urban	NO	Medium	Less	1
115	MiddleAged	Woman	Urban	NO	High	Less	1
116	Young	Man	Urban	YES	High	Less	1
117	MiddleAged	Man	Urban	NO	Medium	Less	1
118	MiddleAged	Man	Urban	NO	High	Less	1
119	MiddleAged	Woman	Urban	NO	Medium	Less	1
121	MiddleAged	Woman	Urban	NO	Medium	Less	1
122	Senior	Man	Urban	NO	Low	Less	1
124	MiddleAged	Woman	Urban	NO	Medium	Less	1
125	Young	Woman	Urban	YES	High	Less	1
127	Senior	Woman	Rural	YES	Medium	Less	1
128	MiddleAged	Man	Urban	NO	High	Less	1
129	MiddleAged	Man	Urban	NO	High	Less	1
130	Young	Woman	Urban	YES	Medium	Less	1
131	Senior	Woman	Rural	NO	Low	Less	1
132	Young	Man	Urban	YES	Medium	Less	1
134	MiddleAged	Woman	Urban	YES	Medium	Less	1
135	Senior	Man	Urban	YES	Medium	Less	1
136	Young	Woman	Urban	YES	High	Less	1
137	MiddleAged	Woman	Urban	YES	High	Less	1
138	Senior	Woman	Rural	YES	Medium	Less	1
139	Senior	Man	Urban	NO	Medium	Less	1
140	MiddleAged	Man	Rural	YES	Medium	Less	1
141	MiddleAged	Woman	Urban	NO	High	Less	1
142	Young	Woman	Urban	NO	High	Less	1
143	MiddleAged	Man	Urban	NO	Medium	Less	1
144	MiddleAged	Man	Rural	YES	High	Less	1
145	Young	Woman	Urban	YES	High	Less	1
146	MiddleAged	Woman	Urban	NO	Medium	Less	1
147	MiddleAged	Man	Urban	NO	High	Less	1
148	Senior	Man	Rural	YES	Low	Less	1
149	MiddleAged	Woman	Urban	NO	Medium	Less	1
150	MiddleAged	Woman	Urban	NO	High	Less	1
151	MiddleAged	Woman	Urban	NO	Medium	Less	1
152	Young	Man	Urban	YES	High	Less	1
153	Senior	Woman	Rural	NO	Low	Less	1
154	Senior	Man	Rural	YES	Low	Less	1
155	MiddleAged	Man	Urban	YES	Medium	Less	1
156	Young	Man	Urban	YES	High	Less	1
157	MiddleAged	Woman	Urban	YES	Medium	Less	1
159	MiddleAged	Woman	Urban	NO	Medium	Less	1
160	MiddleAged	Man	Urban	NO	Medium	Less	1
161	MiddleAged	Woman	Rural	YES	Medium	Less	1
162	MiddleAged	Woman	Urban	NO	Medium	Less	1
163	Senior	Woman	Urban	NO	Medium	Less	1
164	Senior	Woman	Rural	NO	Low	Less	1
166	Senior	Woman	Urban	NO	Low	Less	1
167	Young	Man	Urban	NO	High	Less	1
168	MiddleAged	Woman	Urban	NO	Medium	Less	1
169	MiddleAged	Woman	Urban	NO	Medium	Less	1
170	MiddleAged	Woman	Urban	YES	Medium	Less	1
171	Senior	Man	Urban	NO	Low	Less	1
172	MiddleAged	Woman	Urban	YES	Medium	Less	1
174	Senior	Man	Rural	YES	Low	Less	1
175	MiddleAged	Woman	Urban	NO	Medium	Less	1
176	Senior	Woman	Urban	NO	Low	Less	1
177	MiddleAged	Man	Urban	NO	Medium	Less	1
178	Senior	Woman	Urban	NO	Low	Less	1
179	Young	Woman	Urban	YES	High	Less	1
180	Senior	Woman	Rural	YES	Low	Less	1
181	Senior	Man	Urban	NO	Medium	Less	1
182	MiddleAged	Man	Urban	NO	Medium	Less	1
183	Senior	Woman	Urban	NO	Low	Less	1
185	Young	Man	Urban	NO	High	Less	1
186	MiddleAged	Woman	Rural	YES	Medium	Less	1
187	Senior	Woman	Urban	NO	Medium	Less	1
188	MiddleAged	Man	Urban	YES	Medium	Less	1
189	MiddleAged	Man	Urban	YES	High	Less	1
191	MiddleAged	Woman	Urban	YES	Medium	Less	1
192	Young	Man	Urban	YES	Medium	Less	1
193	MiddleAged	Man	Urban	NO	Low	Less	1
194	Senior	Woman	Urban	NO	Low	Less	1
196	MiddleAged	Woman	Urban	YES	High	Less	1
197	MiddleAged	Man	Rural	YES	Medium	Less	1
199	Young	Woman	Rural	YES	Medium	Less	1
200	Senior	Man	Rural	YES	Low	Less	1
202	Young	Woman	Urban	YES	High	Less	1
203	Senior	Man	Rural	YES	Medium	Less	1
205	Young	Man	Urban	NO	Medium	Less	1
206	MiddleAged	Woman	Urban	NO	Medium	Less	1
208	MiddleAged	Man	Urban	YES	High	Less	1
209	Senior	Man	Rural	YES	Medium	Less	1
210	MiddleAged	Man	Urban	YES	High	Less	1
212	MiddleAged	Woman	Urban	NO	Medium	Less	1
213	Senior	Woman	Rural	YES	Low	Less	1
214	MiddleAged	Man	Urban	NO	Medium	Less	1
216	MiddleAged	Woman	Urban	NO	Medium	Less	1
217	MiddleAged	Man	Urban	YES	Medium	Less	1
218	MiddleAged	Woman	Rural	YES	Medium	Less	1
219	Senior	Man	Rural	NO	Low	Less	1
220	Senior	Woman	Rural	YES	Medium	Less	1
222	MiddleAged	Woman	Urban	NO	High	Less	1
223	MiddleAged	Man	Urban	NO	Medium	Less	1
224	MiddleAged	Woman	Urban	NO	Low	Less	1
225	Young	Man	Urban	YES	High	Less	1
226	Young	Man	Urban	YES	Medium	Less	1
227	Senior	Woman	Rural	YES	Medium	Less	1
228	MiddleAged	Woman	Urban	YES	Low	Less	1
229	Senior	Man	Urban	YES	Low	Less	1
231	Young	Woman	Urban	YES	High	Less	1
232	Young	Man	Urban	YES	Medium	Less	1
233	Senior	Woman	Rural	YES	Low	Less	1
234	Young	Woman	Urban	YES	High	Less	1
235	Young	Woman	Urban	NO	High	Less	1
236	MiddleAged	Man	Urban	NO	Medium	Less	1
237	MiddleAged	Woman	Urban	NO	Medium	Less	1
238	MiddleAged	Woman	Urban	NO	High	Less	1
239	MiddleAged	Man	Urban	NO	Medium	Less	1
242	Senior	Woman	Rural	NO	Low	Less	1
243	Young	Man	Urban	YES	High	Less	1
244	Young	Man	Urban	NO	Medium	Less	1
245	MiddleAged	Woman	Urban	YES	Medium	Less	1
247	MiddleAged	Woman	Urban	NO	High	Less	1
248	Young	Woman	Urban	YES	High	Less	1
249	MiddleAged	Man	Urban	YES	Medium	Less	1
250	MiddleAged	Man	Urban	NO	Medium	Less	1
251	MiddleAged	Woman	Urban	NO	Medium	Less	1
252	Senior	Woman	Urban	YES	Medium	Less	1
254	MiddleAged	Woman	Urban	NO	Medium	Less	1
255	MiddleAged	Man	Urban	YES	Medium	Less	1
256	Senior	Woman	Urban	YES	Low	Less	1
257	MiddleAged	Woman	Urban	NO	Medium	Less	1
258	Senior	Man	Rural	YES	Low	Less	1
259	Young	Man	Urban	YES	High	Less	1
261	Young	Woman	Urban	NO	High	Less	1
262	Senior	Man	Rural	YES	Low	Less	1
263	MiddleAged	Woman	Urban	NO	Low	Less	1
264	MiddleAged	Man	Urban	NO	Medium	Less	1
265	MiddleAged	Woman	Urban	NO	Low	Less	1
266	Senior	Woman	Urban	NO	Low	Less	1
268	Young	Woman	Urban	YES	High	Less	1
269	Senior	Woman	Urban	YES	High	Less	1
271	Senior	Woman	Urban	NO	Low	Less	1
272	Senior	Woman	Urban	YES	High	Less	1
273	Young	Woman	Urban	NO	High	Less	1
274	MiddleAged	Man	Urban	NO	Medium	Less	1
275	Senior	Woman	Rural	YES	Low	Less	1
276	Senior	Man	Rural	YES	Low	Less	1
277	Senior	Man	Rural	YES	Medium	Less	1
278	Young	Woman	Urban	YES	High	Less	1
280	Young	Woman	Urban	YES	Medium	Less	1
281	Senior	Man	Rural	YES	Low	Less	1
282	Young	Man	Urban	YES	High	Less	1
283	Young	Woman	Urban	YES	Medium	Less	1
284	MiddleAged	Woman	Urban	NO	Medium	Less	1
286	Senior	Man	Rural	YES	Low	Less	1
287	MiddleAged	Man	Urban	NO	Low	Less	1
288	Young	Woman	Urban	NO	High	Less	1
290	Young	Man	Urban	YES	Medium	Less	1
291	MiddleAged	Man	Urban	NO	Medium	Less	1
293	Senior	Woman	Rural	YES	Low	Less	1
294	MiddleAged	Man	Urban	NO	Low	Less	1
295	Senior	Woman	Urban	YES	Medium	Less	1
297	MiddleAged	Man	Urban	YES	Medium	Less	1
299	MiddleAged	Man	Urban	YES	High	Less	1
300	MiddleAged	Woman	Urban	YES	High	Less	1
301	MiddleAged	Man	Urban	NO	Medium	Less	1
303	Senior	Woman	Urban	NO	Low	Less	1
305	MiddleAged	Woman	Rural	YES	Medium	Less	1
306	Senior	Man	Rural	YES	Medium	Less	1
307	MiddleAged	Man	Rural	YES	Low	Less	1
308	Young	Man	Urban	YES	High	Less	1
309	MiddleAged	Man	Rural	YES	Medium	Less	1
310	MiddleAged	Woman	Rural	YES	Medium	Less	1
313	MiddleAged	Man	Urban	NO	Medium	Less	1
314	MiddleAged	Man	Urban	YES	High	Less	1
315	MiddleAged	Man	Urban	NO	Medium	Less	1
316	Young	Man	Urban	YES	High	Less	1
317	Senior	Woman	Urban	NO	Medium	Less	1
318	MiddleAged	Woman	Urban	YES	Medium	Less	1
320	MiddleAged	Woman	Rural	YES	Medium	Less	1
321	Senior	Man	Urban	NO	Medium	Less	1
322	Senior	Woman	Rural	NO	Medium	Less	1
323	Senior	Woman	Rural	YES	Low	Less	1
324	Young	Man	Urban	NO	High	Less	1
325	MiddleAged	Man	Urban	NO	Medium	Less	1
327	Senior	Woman	Rural	YES	Low	Less	1
328	MiddleAged	Woman	Urban	YES	Medium	Less	1
329	Senior	Man	Rural	YES	Low	Less	1
330	MiddleAged	Woman	Urban	NO	Medium	Less	1
331	Young	Woman	Rural	YES	High	Less	1
332	Young	Man	Urban	YES	High	Less	1
333	MiddleAged	Woman	Urban	NO	Medium	Less	1
335	MiddleAged	Woman	Rural	YES	Medium	Less	1
336	MiddleAged	Woman	Urban	YES	Medium	Less	1
337	MiddleAged	Woman	Urban	NO	Medium	Less	1
338	Young	Man	Urban	YES	High	Less	1
339	Senior	Woman	Rural	YES	Low	Less	1
340	MiddleAged	Woman	Urban	NO	Medium	Less	1
341	Young	Woman	Urban	YES	High	Less	1
342	Young	Man	Urban	YES	High	Less	1
343	Senior	Woman	Rural	YES	Medium	Less	1
344	MiddleAged	Woman	Urban	NO	Medium	Less	1
345	MiddleAged	Woman	Urban	YES	High	Less	1
2	Senior	Woman	Rural	YES	Low	Suficiente	1
11	MiddleAged	Man	Urban	YES	Medium	Suficiente	1
13	Senior	Woman	Rural	YES	Low	Suficiente	1
37	MiddleAged	Man	Urban	NO	Medium	Suficiente	1
39	MiddleAged	Man	Rural	NO	Medium	Suficiente	1
43	MiddleAged	Man	Rural	NO	Medium	Suficiente	1
53	Senior	Woman	Rural	YES	High	Suficiente	1
56	Young	Man	Rural	YES	High	Suficiente	1
61	Senior	Man	Urban	NO	Low	Suficiente	1
64	MiddleAged	Woman	Rural	YES	Medium	Suficiente	1
68	MiddleAged	Woman	Urban	NO	Medium	Suficiente	1
69	MiddleAged	Woman	Rural	YES	Low	Suficiente	1
71	Senior	Man	Urban	NO	Low	Suficiente	1
80	Senior	Woman	Rural	YES	Low	Suficiente	1
86	Senior	Man	Urban	NO	High	Suficiente	1
89	Young	Woman	Rural	NO	Medium	Suficiente	1
94	MiddleAged	Man	Urban	NO	Low	Suficiente	1
102	Senior	Woman	Urban	YES	Medium	Suficiente	1
106	MiddleAged	Man	Urban	NO	Medium	Suficiente	1
110	MiddleAged	Woman	Urban	YES	High	Suficiente	1
120	Senior	Man	Rural	NO	Low	Suficiente	1
123	Young	Man	Urban	YES	Medium	Suficiente	1
126	MiddleAged	Man	Urban	YES	Medium	Suficiente	1
133	Senior	Man	Rural	YES	Low	Suficiente	1
158	Senior	Man	Urban	NO	Low	Suficiente	1
165	Senior	Man	Rural	NO	Low	Suficiente	1
173	Senior	Man	Rural	NO	Low	Suficiente	1
184	MiddleAged	Man	Urban	NO	Medium	Suficiente	1
190	Young	Woman	Urban	YES	High	Suficiente	1
195	MiddleAged	Woman	Urban	NO	Medium	Suficiente	1
198	MiddleAged	Man	Urban	YES	Medium	Suficiente	1
201	Senior	Woman	Urban	YES	Medium	Suficiente	1
204	MiddleAged	Woman	Rural	YES	Medium	Suficiente	1
207	Senior	Woman	Urban	NO	Low	Suficiente	1
211	MiddleAged	Woman	Urban	YES	High	Suficiente	1
215	Senior	Woman	Rural	YES	Low	Suficiente	1
221	MiddleAged	Woman	Urban	YES	High	Suficiente	1
230	MiddleAged	Woman	Urban	NO	Medium	Suficiente	1
240	Senior	Woman	Rural	YES	Low	Suficiente	1
241	Senior	Woman	Rural	NO	Low	Suficiente	1
246	Senior	Woman	Rural	NO	Medium	Suficiente	1
253	Senior	Man	Urban	NO	Low	Suficiente	1
260	Senior	Woman	Rural	NO	Low	Suficiente	1
267	MiddleAged	Man	Urban	NO	Medium	Suficiente	1
270	Young	Woman	Urban	NO	Medium	Suficiente	1
279	Young	Woman	Urban	YES	Medium	Suficiente	1
285	MiddleAged	Woman	Rural	YES	Medium	Suficiente	1
289	Senior	Woman	Rural	YES	Low	Suficiente	1
292	MiddleAged	Woman	Urban	NO	Low	Suficiente	1
296	Senior	Woman	Rural	YES	Medium	Suficiente	1
298	Young	Man	Urban	NO	Medium	Suficiente	1
302	MiddleAged	Woman	Urban	YES	Medium	Suficiente	1
311	Young	Woman	Rural	YES	Medium	Suficiente	1
312	Senior	Woman	Urban	NO	Low	Suficiente	1
319	Senior	Man	Rural	NO	Low	Suficiente	1
326	Senior	Woman	Urban	NO	Low	Suficiente	1
334	Senior	Man	Rural	NO	Low	Suficiente	1

## Sheet: Question 6
Survey Number	Age	SEX	Residence	Outdoor Activities	Educational level	Measures	Score
4	MiddleAged	Man	Rural	YES	High	6.Extinction M.	3
10	Young	Man	Urban	YES	High	6.Extinction M.	3
16	Young	Woman	Urban	YES	High	6.Extinction M.	4
19	Young	Woman	Rural	YES	High	6.Extinction M.	5
21	MiddleAged	Man	Urban	NO	High	6.Extinction M.	3
27	Young	Man	Urban	YES	High	6.Extinction M.	4
29	Young	Woman	Rural	YES	High	6.Extinction M.	4
38	Young	Woman	Urban	YES	High	6.Extinction M.	3
40	Young	Woman	Urban	YES	High	6.Extinction M.	4
41	Young	Woman	Urban	YES	High	6.Extinction M.	4
53	Senior	Woman	Rural	YES	High	6.Extinction M.	5
56	Young	Man	Rural	YES	High	6.Extinction M.	3
63	MiddleAged	Man	Urban	YES	High	6.Extinction M.	3
66	MiddleAged	Woman	Urban	NO	High	6.Extinction M.	4
72	Young	Man	Urban	NO	High	6.Extinction M.	4
83	Young	Woman	Urban	YES	High	6.Extinction M.	3
85	Young	Woman	Urban	YES	High	6.Extinction M.	2
86	Senior	Man	Urban	NO	High	6.Extinction M.	3
88	MiddleAged	Woman	Urban	YES	High	6.Extinction M.	4
97	Young	Woman	Urban	YES	High	6.Extinction M.	3
104	MiddleAged	Man	Urban	YES	High	6.Extinction M.	5
107	MiddleAged	Man	Rural	YES	High	6.Extinction M.	3
108	Young	Man	Urban	YES	High	6.Extinction M.	5
110	MiddleAged	Woman	Urban	YES	High	6.Extinction M.	4
115	MiddleAged	Woman	Urban	NO	High	6.Extinction M.	5
116	Young	Man	Urban	YES	High	6.Extinction M.	3
118	MiddleAged	Man	Urban	NO	High	6.Extinction M.	4
125	Young	Woman	Urban	YES	High	6.Extinction M.	4
128	MiddleAged	Man	Urban	NO	High	6.Extinction M.	3
129	MiddleAged	Man	Urban	NO	High	6.Extinction M.	4
136	Young	Woman	Urban	YES	High	6.Extinction M.	4
137	MiddleAged	Woman	Urban	YES	High	6.Extinction M.	3
141	MiddleAged	Woman	Urban	NO	High	6.Extinction M.	4
142	Young	Woman	Urban	NO	High	6.Extinction M.	3
144	MiddleAged	Man	Rural	YES	High	6.Extinction M.	3
145	Young	Woman	Urban	YES	High	6.Extinction M.	5
147	MiddleAged	Man	Urban	NO	High	6.Extinction M.	4
150	MiddleAged	Woman	Urban	NO	High	6.Extinction M.	4
152	Young	Man	Urban	YES	High	6.Extinction M.	4
156	Young	Man	Urban	YES	High	6.Extinction M.	3
167	Young	Man	Urban	NO	High	6.Extinction M.	5
179	Young	Woman	Urban	YES	High	6.Extinction M.	2
185	Young	Man	Urban	NO	High	6.Extinction M.	5
189	MiddleAged	Man	Urban	YES	High	6.Extinction M.	3
190	Young	Woman	Urban	YES	High	6.Extinction M.	2
196	MiddleAged	Woman	Urban	YES	High	6.Extinction M.	4
202	Young	Woman	Urban	YES	High	6.Extinction M.	4
208	MiddleAged	Man	Urban	YES	High	6.Extinction M.	3
210	MiddleAged	Man	Urban	YES	High	6.Extinction M.	3
211	MiddleAged	Woman	Urban	YES	High	6.Extinction M.	2
221	MiddleAged	Woman	Urban	YES	High	6.Extinction M.	3
222	MiddleAged	Woman	Urban	NO	High	6.Extinction M.	4
225	Young	Man	Urban	YES	High	6.Extinction M.	5
231	Young	Woman	Urban	YES	High	6.Extinction M.	4
234	Young	Woman	Urban	YES	High	6.Extinction M.	4
235	Young	Woman	Urban	NO	High	6.Extinction M.	3
238	MiddleAged	Woman	Urban	NO	High	6.Extinction M.	3
243	Young	Man	Urban	YES	High	6.Extinction M.	3
247	MiddleAged	Woman	Urban	NO	High	6.Extinction M.	4
248	Young	Woman	Urban	YES	High	6.Extinction M.	4
259	Young	Man	Urban	YES	High	6.Extinction M.	5
261	Young	Woman	Urban	NO	High	6.Extinction M.	4
268	Young	Woman	Urban	YES	High	6.Extinction M.	3
269	Senior	Woman	Urban	YES	High	6.Extinction M.	5
272	Senior	Woman	Urban	YES	High	6.Extinction M.	3
273	Young	Woman	Urban	NO	High	6.Extinction M.	5
278	Young	Woman	Urban	YES	High	6.Extinction M.	5
282	Young	Man	Urban	YES	High	6.Extinction M.	5
288	Young	Woman	Urban	NO	High	6.Extinction M.	5
299	MiddleAged	Man	Urban	YES	High	6.Extinction M.	4
300	MiddleAged	Woman	Urban	YES	High	6.Extinction M.	4
308	Young	Man	Urban	YES	High	6.Extinction M.	2
314	MiddleAged	Man	Urban	YES	High	6.Extinction M.	3
316	Young	Man	Urban	YES	High	6.Extinction M.	4
324	Young	Man	Urban	NO	High	6.Extinction M.	3
331	Young	Woman	Rural	YES	High	6.Extinction M.	3
332	Young	Man	Urban	YES	High	6.Extinction M.	4
338	Young	Man	Urban	YES	High	6.Extinction M.	5
341	Young	Woman	Urban	YES	High	6.Extinction M.	4
342	Young	Man	Urban	YES	High	6.Extinction M.	4
345	MiddleAged	Woman	Urban	YES	High	6.Extinction M.	5
2	Senior	Woman	Rural	YES	Low	6.Extinction M.	3
5	Senior	Woman	Rural	NO	Low	6.Extinction M.	4
7	Senior	Woman	Rural	NO	Low	6.Extinction M.	4
8	Senior	Man	Urban	NO	Low	6.Extinction M.	5
12	Senior	Man	Rural	YES	Low	6.Extinction M.	5
13	Senior	Woman	Rural	YES	Low	6.Extinction M.	5
22	Senior	Man	Urban	NO	Low	6.Extinction M.	3
26	MiddleAged	Woman	Urban	NO	Low	6.Extinction M.	4
30	Senior	Woman	Urban	NO	Low	6.Extinction M.	4
33	Senior	Man	Rural	NO	Low	6.Extinction M.	3
34	Senior	Man	Rural	YES	Low	6.Extinction M.	4
44	Senior	Woman	Rural	YES	Low	6.Extinction M.	3
45	MiddleAged	Woman	Urban	YES	Low	6.Extinction M.	5
50	Senior	Woman	Rural	NO	Low	6.Extinction M.	2
51	Senior	Man	Rural	NO	Low	6.Extinction M.	3
52	Senior	Woman	Rural	NO	Low	6.Extinction M.	4
58	MiddleAged	Woman	Urban	YES	Low	6.Extinction M.	3
59	Senior	Woman	Urban	NO	Low	6.Extinction M.	3
61	Senior	Man	Urban	NO	Low	6.Extinction M.	3
62	Senior	Man	Rural	NO	Low	6.Extinction M.	4
67	MiddleAged	Man	Urban	YES	Low	6.Extinction M.	3
69	MiddleAged	Woman	Rural	YES	Low	6.Extinction M.	4
71	Senior	Man	Urban	NO	Low	6.Extinction M.	3
77	Senior	Man	Rural	YES	Low	6.Extinction M.	5
80	Senior	Woman	Rural	YES	Low	6.Extinction M.	2
81	MiddleAged	Man	Urban	NO	Low	6.Extinction M.	3
87	Senior	Man	Rural	NO	Low	6.Extinction M.	3
91	Senior	Man	Urban	NO	Low	6.Extinction M.	2
93	Senior	Woman	Rural	YES	Low	6.Extinction M.	4
94	MiddleAged	Man	Urban	NO	Low	6.Extinction M.	3
99	Senior	Man	Urban	NO	Low	6.Extinction M.	5
109	Senior	Woman	Rural	YES	Low	6.Extinction M.	4
112	Senior	Man	Urban	NO	Low	6.Extinction M.	4
120	Senior	Man	Rural	NO	Low	6.Extinction M.	3
122	Senior	Man	Urban	NO	Low	6.Extinction M.	4
131	Senior	Woman	Rural	NO	Low	6.Extinction M.	4
133	Senior	Man	Rural	YES	Low	6.Extinction M.	4
148	Senior	Man	Rural	YES	Low	6.Extinction M.	3
153	Senior	Woman	Rural	NO	Low	6.Extinction M.	2
154	Senior	Man	Rural	YES	Low	6.Extinction M.	5
158	Senior	Man	Urban	NO	Low	6.Extinction M.	4
164	Senior	Woman	Rural	NO	Low	6.Extinction M.	3
165	Senior	Man	Rural	NO	Low	6.Extinction M.	3
166	Senior	Woman	Urban	NO	Low	6.Extinction M.	4
171	Senior	Man	Urban	NO	Low	6.Extinction M.	4
173	Senior	Man	Rural	NO	Low	6.Extinction M.	3
174	Senior	Man	Rural	YES	Low	6.Extinction M.	4
176	Senior	Woman	Urban	NO	Low	6.Extinction M.	3
178	Senior	Woman	Urban	NO	Low	6.Extinction M.	4
180	Senior	Woman	Rural	YES	Low	6.Extinction M.	3
183	Senior	Woman	Urban	NO	Low	6.Extinction M.	3
193	MiddleAged	Man	Urban	NO	Low	6.Extinction M.	3
194	Senior	Woman	Urban	NO	Low	6.Extinction M.	5
200	Senior	Man	Rural	YES	Low	6.Extinction M.	4
207	Senior	Woman	Urban	NO	Low	6.Extinction M.	3
213	Senior	Woman	Rural	YES	Low	6.Extinction M.	4
215	Senior	Woman	Rural	YES	Low	6.Extinction M.	3
219	Senior	Man	Rural	NO	Low	6.Extinction M.	3
224	MiddleAged	Woman	Urban	NO	Low	6.Extinction M.	3
228	MiddleAged	Woman	Urban	YES	Low	6.Extinction M.	3
229	Senior	Man	Urban	YES	Low	6.Extinction M.	4
233	Senior	Woman	Rural	YES	Low	6.Extinction M.	4
240	Senior	Woman	Rural	YES	Low	6.Extinction M.	3
241	Senior	Woman	Rural	NO	Low	6.Extinction M.	3
242	Senior	Woman	Rural	NO	Low	6.Extinction M.	4
253	Senior	Man	Urban	NO	Low	6.Extinction M.	3
256	Senior	Woman	Urban	YES	Low	6.Extinction M.	5
258	Senior	Man	Rural	YES	Low	6.Extinction M.	4
260	Senior	Woman	Rural	NO	Low	6.Extinction M.	3
262	Senior	Man	Rural	YES	Low	6.Extinction M.	3
263	MiddleAged	Woman	Urban	NO	Low	6.Extinction M.	3
265	MiddleAged	Woman	Urban	NO	Low	6.Extinction M.	3
266	Senior	Woman	Urban	NO	Low	6.Extinction M.	4
271	Senior	Woman	Urban	NO	Low	6.Extinction M.	4
275	Senior	Woman	Rural	YES	Low	6.Extinction M.	4
276	Senior	Man	Rural	YES	Low	6.Extinction M.	4
281	Senior	Man	Rural	YES	Low	6.Extinction M.	2
286	Senior	Man	Rural	YES	Low	6.Extinction M.	4
287	MiddleAged	Man	Urban	NO	Low	6.Extinction M.	5
289	Senior	Woman	Rural	YES	Low	6.Extinction M.	4
292	MiddleAged	Woman	Urban	NO	Low	6.Extinction M.	5
293	Senior	Woman	Rural	YES	Low	6.Extinction M.	4
294	MiddleAged	Man	Urban	NO	Low	6.Extinction M.	2
303	Senior	Woman	Urban	NO	Low	6.Extinction M.	4
304	Senior	Woman	Urban	NO	Low	6.Extinction M.	2
307	MiddleAged	Man	Rural	YES	Low	6.Extinction M.	3
312	Senior	Woman	Urban	NO	Low	6.Extinction M.	3
319	Senior	Man	Rural	NO	Low	6.Extinction M.	4
323	Senior	Woman	Rural	YES	Low	6.Extinction M.	4
326	Senior	Woman	Urban	NO	Low	6.Extinction M.	4
327	Senior	Woman	Rural	YES	Low	6.Extinction M.	4
329	Senior	Man	Rural	YES	Low	6.Extinction M.	3
334	Senior	Man	Rural	NO	Low	6.Extinction M.	3
339	Senior	Woman	Rural	YES	Low	6.Extinction M.	3
1	MiddleAged	Woman	Urban	NO	Medium	6.Extinction M.	5
3	MiddleAged	Man	Urban	YES	Medium	6.Extinction M.	4
6	Young	Woman	Urban	YES	Medium	6.Extinction M.	3
9	Young	Woman	Urban	YES	Medium	6.Extinction M.	5
11	MiddleAged	Man	Urban	YES	Medium	6.Extinction M.	3
14	MiddleAged	Woman	Urban	YES	Medium	6.Extinction M.	4
15	MiddleAged	Woman	Urban	YES	Medium	6.Extinction M.	4
17	Senior	Woman	Rural	NO	Medium	6.Extinction M.	3
18	Young	Man	Urban	YES	Medium	6.Extinction M.	4
20	MiddleAged	Woman	Urban	NO	Medium	6.Extinction M.	3
23	MiddleAged	Man	Urban	YES	Medium	6.Extinction M.	3
24	MiddleAged	Woman	Urban	YES	Medium	6.Extinction M.	5
25	MiddleAged	Man	Urban	NO	Medium	6.Extinction M.	3
28	Young	Man	Rural	YES	Medium	6.Extinction M.	5
31	MiddleAged	Woman	Urban	NO	Medium	6.Extinction M.	4
32	Senior	Woman	Rural	NO	Medium	6.Extinction M.	4
35	MiddleAged	Woman	Urban	YES	Medium	6.Extinction M.	4
36	MiddleAged	Woman	Urban	YES	Medium	6.Extinction M.	3
37	MiddleAged	Man	Urban	NO	Medium	6.Extinction M.	2
39	MiddleAged	Man	Rural	NO	Medium	6.Extinction M.	2
42	MiddleAged	Man	Urban	YES	Medium	6.Extinction M.	5
43	MiddleAged	Man	Rural	NO	Medium	6.Extinction M.	3
46	MiddleAged	Woman	Urban	YES	Medium	6.Extinction M.	5
47	Young	Man	Urban	YES	Medium	6.Extinction M.	4
48	MiddleAged	Man	Rural	NO	Medium	6.Extinction M.	5
49	Senior	Woman	Urban	NO	Medium	6.Extinction M.	3
54	MiddleAged	Woman	Urban	NO	Medium	6.Extinction M.	3
55	MiddleAged	Man	Urban	NO	Medium	6.Extinction M.	4
57	MiddleAged	Man	Rural	NO	Medium	6.Extinction M.	4
60	Senior	Woman	Urban	NO	Medium	6.Extinction M.	2
64	MiddleAged	Woman	Rural	YES	Medium	6.Extinction M.	5
65	MiddleAged	Woman	Urban	NO	Medium	6.Extinction M.	4
68	MiddleAged	Woman	Urban	NO	Medium	6.Extinction M.	3
70	MiddleAged	Woman	Urban	NO	Medium	6.Extinction M.	3
73	MiddleAged	Man	Urban	YES	Medium	6.Extinction M.	4
74	MiddleAged	Woman	Urban	YES	Medium	6.Extinction M.	4
75	Young	Woman	Urban	NO	Medium	6.Extinction M.	5
76	MiddleAged	Woman	Urban	NO	Medium	6.Extinction M.	4
78	MiddleAged	Woman	Urban	NO	Medium	6.Extinction M.	4
79	MiddleAged	Man	Urban	NO	Medium	6.Extinction M.	4
82	MiddleAged	Man	Urban	YES	Medium	6.Extinction M.	3
84	Senior	Man	Urban	NO	Medium	6.Extinction M.	4
89	Young	Woman	Rural	NO	Medium	6.Extinction M.	3
90	MiddleAged	Woman	Urban	NO	Medium	6.Extinction M.	3
92	MiddleAged	Man	Urban	YES	Medium	6.Extinction M.	4
95	Young	Woman	Urban	NO	Medium	6.Extinction M.	5
96	MiddleAged	Woman	Urban	NO	Medium	6.Extinction M.	5
98	Young	Man	Urban	NO	Medium	6.Extinction M.	2
100	MiddleAged	Man	Urban	NO	Medium	6.Extinction M.	3
101	Senior	Man	Rural	NO	Medium	6.Extinction M.	5
102	Senior	Woman	Urban	YES	Medium	6.Extinction M.	3
103	Young	Woman	Urban	YES	Medium	6.Extinction M.	5
105	Senior	Woman	Rural	YES	Medium	6.Extinction M.	4
106	MiddleAged	Man	Urban	NO	Medium	6.Extinction M.	2
111	MiddleAged	Woman	Rural	YES	Medium	6.Extinction M.	5
113	Senior	Woman	Urban	NO	Medium	6.Extinction M.	3
114	Young	Woman	Urban	NO	Medium	6.Extinction M.	5
117	MiddleAged	Man	Urban	NO	Medium	6.Extinction M.	4
119	MiddleAged	Woman	Urban	NO	Medium	6.Extinction M.	3
121	MiddleAged	Woman	Urban	NO	Medium	6.Extinction M.	3
123	Young	Man	Urban	YES	Medium	6.Extinction M.	5
124	MiddleAged	Woman	Urban	NO	Medium	6.Extinction M.	3
126	MiddleAged	Man	Urban	YES	Medium	6.Extinction M.	3
127	Senior	Woman	Rural	YES	Medium	6.Extinction M.	5
130	Young	Woman	Urban	YES	Medium	6.Extinction M.	4
132	Young	Man	Urban	YES	Medium	6.Extinction M.	3
134	MiddleAged	Woman	Urban	YES	Medium	6.Extinction M.	5
135	Senior	Man	Urban	YES	Medium	6.Extinction M.	3
138	Senior	Woman	Rural	YES	Medium	6.Extinction M.	4
139	Senior	Man	Urban	NO	Medium	6.Extinction M.	3
140	MiddleAged	Man	Rural	YES	Medium	6.Extinction M.	5
143	MiddleAged	Man	Urban	NO	Medium	6.Extinction M.	4
146	MiddleAged	Woman	Urban	NO	Medium	6.Extinction M.	4
149	MiddleAged	Woman	Urban	NO	Medium	6.Extinction M.	4
151	MiddleAged	Woman	Urban	NO	Medium	6.Extinction M.	3
155	MiddleAged	Man	Urban	YES	Medium	6.Extinction M.	4
157	MiddleAged	Woman	Urban	YES	Medium	6.Extinction M.	5
159	MiddleAged	Woman	Urban	NO	Medium	6.Extinction M.	5
160	MiddleAged	Man	Urban	NO	Medium	6.Extinction M.	5
161	MiddleAged	Woman	Rural	YES	Medium	6.Extinction M.	5
162	MiddleAged	Woman	Urban	NO	Medium	6.Extinction M.	4
163	Senior	Woman	Urban	NO	Medium	6.Extinction M.	3
168	MiddleAged	Woman	Urban	NO	Medium	6.Extinction M.	5
169	MiddleAged	Woman	Urban	NO	Medium	6.Extinction M.	3
170	MiddleAged	Woman	Urban	YES	Medium	6.Extinction M.	4
172	MiddleAged	Woman	Urban	YES	Medium	6.Extinction M.	3
175	MiddleAged	Woman	Urban	NO	Medium	6.Extinction M.	3
177	MiddleAged	Man	Urban	NO	Medium	6.Extinction M.	3
181	Senior	Man	Urban	NO	Medium	6.Extinction M.	4
182	MiddleAged	Man	Urban	NO	Medium	6.Extinction M.	4
184	MiddleAged	Man	Urban	NO	Medium	6.Extinction M.	3
186	MiddleAged	Woman	Rural	YES	Medium	6.Extinction M.	4
187	Senior	Woman	Urban	NO	Medium	6.Extinction M.	4
188	MiddleAged	Man	Urban	YES	Medium	6.Extinction M.	4
191	MiddleAged	Woman	Urban	YES	Medium	6.Extinction M.	4
192	Young	Man	Urban	YES	Medium	6.Extinction M.	5
195	MiddleAged	Woman	Urban	NO	Medium	6.Extinction M.	3
197	MiddleAged	Man	Rural	YES	Medium	6.Extinction M.	5
198	MiddleAged	Man	Urban	YES	Medium	6.Extinction M.	3
199	Young	Woman	Rural	YES	Medium	6.Extinction M.	4
201	Senior	Woman	Urban	YES	Medium	6.Extinction M.	4
203	Senior	Man	Rural	YES	Medium	6.Extinction M.	2
204	MiddleAged	Woman	Rural	YES	Medium	6.Extinction M.	2
205	Young	Man	Urban	NO	Medium	6.Extinction M.	4
206	MiddleAged	Woman	Urban	NO	Medium	6.Extinction M.	3
209	Senior	Man	Rural	YES	Medium	6.Extinction M.	5
212	MiddleAged	Woman	Urban	NO	Medium	6.Extinction M.	3
214	MiddleAged	Man	Urban	NO	Medium	6.Extinction M.	4
216	MiddleAged	Woman	Urban	NO	Medium	6.Extinction M.	4
217	MiddleAged	Man	Urban	YES	Medium	6.Extinction M.	3
218	MiddleAged	Woman	Rural	YES	Medium	6.Extinction M.	2
220	Senior	Woman	Rural	YES	Medium	6.Extinction M.	4
223	MiddleAged	Man	Urban	NO	Medium	6.Extinction M.	4
226	Young	Man	Urban	YES	Medium	6.Extinction M.	5
227	Senior	Woman	Rural	YES	Medium	6.Extinction M.	4
230	MiddleAged	Woman	Urban	NO	Medium	6.Extinction M.	3
232	Young	Man	Urban	YES	Medium	6.Extinction M.	5
236	MiddleAged	Man	Urban	NO	Medium	6.Extinction M.	3
237	MiddleAged	Woman	Urban	NO	Medium	6.Extinction M.	3
239	MiddleAged	Man	Urban	NO	Medium	6.Extinction M.	4
244	Young	Man	Urban	NO	Medium	6.Extinction M.	3
245	MiddleAged	Woman	Urban	YES	Medium	6.Extinction M.	4
246	Senior	Woman	Rural	NO	Medium	6.Extinction M.	3
249	MiddleAged	Man	Urban	YES	Medium	6.Extinction M.	4
250	MiddleAged	Man	Urban	NO	Medium	6.Extinction M.	3
251	MiddleAged	Woman	Urban	NO	Medium	6.Extinction M.	4
252	Senior	Woman	Urban	YES	Medium	6.Extinction M.	4
254	MiddleAged	Woman	Urban	NO	Medium	6.Extinction M.	5
255	MiddleAged	Man	Urban	YES	Medium	6.Extinction M.	4
257	MiddleAged	Woman	Urban	NO	Medium	6.Extinction M.	4
264	MiddleAged	Man	Urban	NO	Medium	6.Extinction M.	2
267	MiddleAged	Man	Urban	NO	Medium	6.Extinction M.	3
270	Young	Woman	Urban	NO	Medium	6.Extinction M.	3
274	MiddleAged	Man	Urban	NO	Medium	6.Extinction M.	3
277	Senior	Man	Rural	YES	Medium	6.Extinction M.	5
279	Young	Woman	Urban	YES	Medium	6.Extinction M.	5
280	Young	Woman	Urban	YES	Medium	6.Extinction M.	3
283	Young	Woman	Urban	YES	Medium	6.Extinction M.	3
284	MiddleAged	Woman	Urban	NO	Medium	6.Extinction M.	3
285	MiddleAged	Woman	Rural	YES	Medium	6.Extinction M.	3
290	Young	Man	Urban	YES	Medium	6.Extinction M.	2
291	MiddleAged	Man	Urban	NO	Medium	6.Extinction M.	3
295	Senior	Woman	Urban	YES	Medium	6.Extinction M.	2
296	Senior	Woman	Rural	YES	Medium	6.Extinction M.	3
297	MiddleAged	Man	Urban	YES	Medium	6.Extinction M.	4
298	Young	Man	Urban	NO	Medium	6.Extinction M.	3
301	MiddleAged	Man	Urban	NO	Medium	6.Extinction M.	4
302	MiddleAged	Woman	Urban	YES	Medium	6.Extinction M.	3
305	MiddleAged	Woman	Rural	YES	Medium	6.Extinction M.	4
306	Senior	Man	Rural	YES	Medium	6.Extinction M.	5
309	MiddleAged	Man	Rural	YES	Medium	6.Extinction M.	3
310	MiddleAged	Woman	Rural	YES	Medium	6.Extinction M.	4
311	Young	Woman	Rural	YES	Medium	6.Extinction M.	5
313	MiddleAged	Man	Urban	NO	Medium	6.Extinction M.	4
315	MiddleAged	Man	Urban	NO	Medium	6.Extinction M.	5
317	Senior	Woman	Urban	NO	Medium	6.Extinction M.	5
318	MiddleAged	Woman	Urban	YES	Medium	6.Extinction M.	3
320	MiddleAged	Woman	Rural	YES	Medium	6.Extinction M.	4
321	Senior	Man	Urban	NO	Medium	6.Extinction M.	4
322	Senior	Woman	Rural	NO	Medium	6.Extinction M.	5
325	MiddleAged	Man	Urban	NO	Medium	6.Extinction M.	3
328	MiddleAged	Woman	Urban	YES	Medium	6.Extinction M.	4
330	MiddleAged	Woman	Urban	NO	Medium	6.Extinction M.	3
333	MiddleAged	Woman	Urban	NO	Medium	6.Extinction M.	4
335	MiddleAged	Woman	Rural	YES	Medium	6.Extinction M.	4
336	MiddleAged	Woman	Urban	YES	Medium	6.Extinction M.	3
337	MiddleAged	Woman	Urban	NO	Medium	6.Extinction M.	4
340	MiddleAged	Woman	Urban	NO	Medium	6.Extinction M.	3
343	Senior	Woman	Rural	YES	Medium	6.Extinction M.	3
344	MiddleAged	Woman	Urban	NO	Medium	6.Extinction M.	4
4	MiddleAged	Man	Rural	YES	High	6.Env.Edu.	5
10	Young	Man	Urban	YES	High	6.Env.Edu.	5
16	Young	Woman	Urban	YES	High	6.Env.Edu.	5
19	Young	Woman	Rural	YES	High	6.Env.Edu.	5
21	MiddleAged	Man	Urban	NO	High	6.Env.Edu.	3
27	Young	Man	Urban	YES	High	6.Env.Edu.	5
29	Young	Woman	Rural	YES	High	6.Env.Edu.	5
38	Young	Woman	Urban	YES	High	6.Env.Edu.	5
40	Young	Woman	Urban	YES	High	6.Env.Edu.	4
41	Young	Woman	Urban	YES	High	6.Env.Edu.	5
53	Senior	Woman	Rural	YES	High	6.Env.Edu.	5
56	Young	Man	Rural	YES	High	6.Env.Edu.	3
63	MiddleAged	Man	Urban	YES	High	6.Env.Edu.	4
66	MiddleAged	Woman	Urban	NO	High	6.Env.Edu.	5
72	Young	Man	Urban	NO	High	6.Env.Edu.	5
83	Young	Woman	Urban	YES	High	6.Env.Edu.	5
85	Young	Woman	Urban	YES	High	6.Env.Edu.	3
86	Senior	Man	Urban	NO	High	6.Env.Edu.	3
88	MiddleAged	Woman	Urban	YES	High	6.Env.Edu.	5
97	Young	Woman	Urban	YES	High	6.Env.Edu.	4
104	MiddleAged	Man	Urban	YES	High	6.Env.Edu.	3
107	MiddleAged	Man	Rural	YES	High	6.Env.Edu.	4
108	Young	Man	Urban	YES	High	6.Env.Edu.	5
110	MiddleAged	Woman	Urban	YES	High	6.Env.Edu.	5
115	MiddleAged	Woman	Urban	NO	High	6.Env.Edu.	5
116	Young	Man	Urban	YES	High	6.Env.Edu.	4
118	MiddleAged	Man	Urban	NO	High	6.Env.Edu.	5
125	Young	Woman	Urban	YES	High	6.Env.Edu.	5
128	MiddleAged	Man	Urban	NO	High	6.Env.Edu.	3
129	MiddleAged	Man	Urban	NO	High	6.Env.Edu.	5
136	Young	Woman	Urban	YES	High	6.Env.Edu.	5
137	MiddleAged	Woman	Urban	YES	High	6.Env.Edu.	5
141	MiddleAged	Woman	Urban	NO	High	6.Env.Edu.	4
142	Young	Woman	Urban	NO	High	6.Env.Edu.	5
144	MiddleAged	Man	Rural	YES	High	6.Env.Edu.	4
145	Young	Woman	Urban	YES	High	6.Env.Edu.	5
147	MiddleAged	Man	Urban	NO	High	6.Env.Edu.	5
150	MiddleAged	Woman	Urban	NO	High	6.Env.Edu.	5
152	Young	Man	Urban	YES	High	6.Env.Edu.	5
156	Young	Man	Urban	YES	High	6.Env.Edu.	5
167	Young	Man	Urban	NO	High	6.Env.Edu.	5
179	Young	Woman	Urban	YES	High	6.Env.Edu.	3
185	Young	Man	Urban	NO	High	6.Env.Edu.	4
189	MiddleAged	Man	Urban	YES	High	6.Env.Edu.	4
190	Young	Woman	Urban	YES	High	6.Env.Edu.	3
196	MiddleAged	Woman	Urban	YES	High	6.Env.Edu.	5
202	Young	Woman	Urban	YES	High	6.Env.Edu.	5
208	MiddleAged	Man	Urban	YES	High	6.Env.Edu.	5
210	MiddleAged	Man	Urban	YES	High	6.Env.Edu.	3
211	MiddleAged	Woman	Urban	YES	High	6.Env.Edu.	5
221	MiddleAged	Woman	Urban	YES	High	6.Env.Edu.	5
222	MiddleAged	Woman	Urban	NO	High	6.Env.Edu.	5
225	Young	Man	Urban	YES	High	6.Env.Edu.	5
231	Young	Woman	Urban	YES	High	6.Env.Edu.	5
234	Young	Woman	Urban	YES	High	6.Env.Edu.	5
235	Young	Woman	Urban	NO	High	6.Env.Edu.	5
238	MiddleAged	Woman	Urban	NO	High	6.Env.Edu.	3
243	Young	Man	Urban	YES	High	6.Env.Edu.	5
247	MiddleAged	Woman	Urban	NO	High	6.Env.Edu.	5
248	Young	Woman	Urban	YES	High	6.Env.Edu.	4
259	Young	Man	Urban	YES	High	6.Env.Edu.	4
261	Young	Woman	Urban	NO	High	6.Env.Edu.	5
268	Young	Woman	Urban	YES	High	6.Env.Edu.	5
269	Senior	Woman	Urban	YES	High	6.Env.Edu.	5
272	Senior	Woman	Urban	YES	High	6.Env.Edu.	4
273	Young	Woman	Urban	NO	High	6.Env.Edu.	4
278	Young	Woman	Urban	YES	High	6.Env.Edu.	5
282	Young	Man	Urban	YES	High	6.Env.Edu.	5
288	Young	Woman	Urban	NO	High	6.Env.Edu.	5
299	MiddleAged	Man	Urban	YES	High	6.Env.Edu.	5
300	MiddleAged	Woman	Urban	YES	High	6.Env.Edu.	5
308	Young	Man	Urban	YES	High	6.Env.Edu.	3
314	MiddleAged	Man	Urban	YES	High	6.Env.Edu.	5
316	Young	Man	Urban	YES	High	6.Env.Edu.	5
324	Young	Man	Urban	NO	High	6.Env.Edu.	4
331	Young	Woman	Rural	YES	High	6.Env.Edu.	5
332	Young	Man	Urban	YES	High	6.Env.Edu.	4
338	Young	Man	Urban	YES	High	6.Env.Edu.	5
341	Young	Woman	Urban	YES	High	6.Env.Edu.	4
342	Young	Man	Urban	YES	High	6.Env.Edu.	5
345	MiddleAged	Woman	Urban	YES	High	6.Env.Edu.	5
2	Senior	Woman	Rural	YES	Low	6.Env.Edu.	4
5	Senior	Woman	Rural	NO	Low	6.Env.Edu.	5
7	Senior	Woman	Rural	NO	Low	6.Env.Edu.	4
8	Senior	Man	Urban	NO	Low	6.Env.Edu.	5
12	Senior	Man	Rural	YES	Low	6.Env.Edu.	4
13	Senior	Woman	Rural	YES	Low	6.Env.Edu.	4
22	Senior	Man	Urban	NO	Low	6.Env.Edu.	5
26	MiddleAged	Woman	Urban	NO	Low	6.Env.Edu.	5
30	Senior	Woman	Urban	NO	Low	6.Env.Edu.	4
33	Senior	Man	Rural	NO	Low	6.Env.Edu.	4
34	Senior	Man	Rural	YES	Low	6.Env.Edu.	4
44	Senior	Woman	Rural	YES	Low	6.Env.Edu.	5
45	MiddleAged	Woman	Urban	YES	Low	6.Env.Edu.	4
50	Senior	Woman	Rural	NO	Low	6.Env.Edu.	4
51	Senior	Man	Rural	NO	Low	6.Env.Edu.	4
52	Senior	Woman	Rural	NO	Low	6.Env.Edu.	5
58	MiddleAged	Woman	Urban	YES	Low	6.Env.Edu.	3
59	Senior	Woman	Urban	NO	Low	6.Env.Edu.	3
61	Senior	Man	Urban	NO	Low	6.Env.Edu.	5
62	Senior	Man	Rural	NO	Low	6.Env.Edu.	4
67	MiddleAged	Man	Urban	YES	Low	6.Env.Edu.	3
69	MiddleAged	Woman	Rural	YES	Low	6.Env.Edu.	3
71	Senior	Man	Urban	NO	Low	6.Env.Edu.	3
77	Senior	Man	Rural	YES	Low	6.Env.Edu.	2
80	Senior	Woman	Rural	YES	Low	6.Env.Edu.	3
81	MiddleAged	Man	Urban	NO	Low	6.Env.Edu.	4
87	Senior	Man	Rural	NO	Low	6.Env.Edu.	4
91	Senior	Man	Urban	NO	Low	6.Env.Edu.	3
93	Senior	Woman	Rural	YES	Low	6.Env.Edu.	4
94	MiddleAged	Man	Urban	NO	Low	6.Env.Edu.	5
99	Senior	Man	Urban	NO	Low	6.Env.Edu.	5
109	Senior	Woman	Rural	YES	Low	6.Env.Edu.	5
112	Senior	Man	Urban	NO	Low	6.Env.Edu.	4
120	Senior	Man	Rural	NO	Low	6.Env.Edu.	2
122	Senior	Man	Urban	NO	Low	6.Env.Edu.	5
131	Senior	Woman	Rural	NO	Low	6.Env.Edu.	2
133	Senior	Man	Rural	YES	Low	6.Env.Edu.	3
148	Senior	Man	Rural	YES	Low	6.Env.Edu.	5
153	Senior	Woman	Rural	NO	Low	6.Env.Edu.	4
154	Senior	Man	Rural	YES	Low	6.Env.Edu.	5
158	Senior	Man	Urban	NO	Low	6.Env.Edu.	4
164	Senior	Woman	Rural	NO	Low	6.Env.Edu.	5
165	Senior	Man	Rural	NO	Low	6.Env.Edu.	2
166	Senior	Woman	Urban	NO	Low	6.Env.Edu.	4
171	Senior	Man	Urban	NO	Low	6.Env.Edu.	5
173	Senior	Man	Rural	NO	Low	6.Env.Edu.	3
174	Senior	Man	Rural	YES	Low	6.Env.Edu.	3
176	Senior	Woman	Urban	NO	Low	6.Env.Edu.	5
178	Senior	Woman	Urban	NO	Low	6.Env.Edu.	2
180	Senior	Woman	Rural	YES	Low	6.Env.Edu.	5
183	Senior	Woman	Urban	NO	Low	6.Env.Edu.	4
193	MiddleAged	Man	Urban	NO	Low	6.Env.Edu.	4
194	Senior	Woman	Urban	NO	Low	6.Env.Edu.	4
200	Senior	Man	Rural	YES	Low	6.Env.Edu.	4
207	Senior	Woman	Urban	NO	Low	6.Env.Edu.	2
213	Senior	Woman	Rural	YES	Low	6.Env.Edu.	3
215	Senior	Woman	Rural	YES	Low	6.Env.Edu.	3
219	Senior	Man	Rural	NO	Low	6.Env.Edu.	5
224	MiddleAged	Woman	Urban	NO	Low	6.Env.Edu.	5
228	MiddleAged	Woman	Urban	YES	Low	6.Env.Edu.	4
229	Senior	Man	Urban	YES	Low	6.Env.Edu.	4
233	Senior	Woman	Rural	YES	Low	6.Env.Edu.	2
240	Senior	Woman	Rural	YES	Low	6.Env.Edu.	2
241	Senior	Woman	Rural	NO	Low	6.Env.Edu.	3
242	Senior	Woman	Rural	NO	Low	6.Env.Edu.	3
253	Senior	Man	Urban	NO	Low	6.Env.Edu.	2
256	Senior	Woman	Urban	YES	Low	6.Env.Edu.	2
258	Senior	Man	Rural	YES	Low	6.Env.Edu.	5
260	Senior	Woman	Rural	NO	Low	6.Env.Edu.	4
262	Senior	Man	Rural	YES	Low	6.Env.Edu.	5
263	MiddleAged	Woman	Urban	NO	Low	6.Env.Edu.	5
265	MiddleAged	Woman	Urban	NO	Low	6.Env.Edu.	4
266	Senior	Woman	Urban	NO	Low	6.Env.Edu.	4
271	Senior	Woman	Urban	NO	Low	6.Env.Edu.	5
275	Senior	Woman	Rural	YES	Low	6.Env.Edu.	2
276	Senior	Man	Rural	YES	Low	6.Env.Edu.	2
281	Senior	Man	Rural	YES	Low	6.Env.Edu.	4
286	Senior	Man	Rural	YES	Low	6.Env.Edu.	4
287	MiddleAged	Man	Urban	NO	Low	6.Env.Edu.	5
289	Senior	Woman	Rural	YES	Low	6.Env.Edu.	2
292	MiddleAged	Woman	Urban	NO	Low	6.Env.Edu.	1
293	Senior	Woman	Rural	YES	Low	6.Env.Edu.	5
294	MiddleAged	Man	Urban	NO	Low	6.Env.Edu.	3
303	Senior	Woman	Urban	NO	Low	6.Env.Edu.	2
304	Senior	Woman	Urban	NO	Low	6.Env.Edu.	2
307	MiddleAged	Man	Rural	YES	Low	6.Env.Edu.	2
312	Senior	Woman	Urban	NO	Low	6.Env.Edu.	3
319	Senior	Man	Rural	NO	Low	6.Env.Edu.	3
323	Senior	Woman	Rural	YES	Low	6.Env.Edu.	5
326	Senior	Woman	Urban	NO	Low	6.Env.Edu.	3
327	Senior	Woman	Rural	YES	Low	6.Env.Edu.	5
329	Senior	Man	Rural	YES	Low	6.Env.Edu.	3
334	Senior	Man	Rural	NO	Low	6.Env.Edu.	2
339	Senior	Woman	Rural	YES	Low	6.Env.Edu.	5
1	MiddleAged	Woman	Urban	NO	Medium	6.Env.Edu.	5
3	MiddleAged	Man	Urban	YES	Medium	6.Env.Edu.	5
6	Young	Woman	Urban	YES	Medium	6.Env.Edu.	5
9	Young	Woman	Urban	YES	Medium	6.Env.Edu.	4
11	MiddleAged	Man	Urban	YES	Medium	6.Env.Edu.	5
14	MiddleAged	Woman	Urban	YES	Medium	6.Env.Edu.	5
15	MiddleAged	Woman	Urban	YES	Medium	6.Env.Edu.	4
17	Senior	Woman	Rural	NO	Medium	6.Env.Edu.	4
18	Young	Man	Urban	YES	Medium	6.Env.Edu.	5
20	MiddleAged	Woman	Urban	NO	Medium	6.Env.Edu.	5
23	MiddleAged	Man	Urban	YES	Medium	6.Env.Edu.	4
24	MiddleAged	Woman	Urban	YES	Medium	6.Env.Edu.	5
25	MiddleAged	Man	Urban	NO	Medium	6.Env.Edu.	5
28	Young	Man	Rural	YES	Medium	6.Env.Edu.	5
31	MiddleAged	Woman	Urban	NO	Medium	6.Env.Edu.	5
32	Senior	Woman	Rural	NO	Medium	6.Env.Edu.	5
35	MiddleAged	Woman	Urban	YES	Medium	6.Env.Edu.	4
36	MiddleAged	Woman	Urban	YES	Medium	6.Env.Edu.	5
37	MiddleAged	Man	Urban	NO	Medium	6.Env.Edu.	2
39	MiddleAged	Man	Rural	NO	Medium	6.Env.Edu.	4
42	MiddleAged	Man	Urban	YES	Medium	6.Env.Edu.	4
43	MiddleAged	Man	Rural	NO	Medium	6.Env.Edu.	3
46	MiddleAged	Woman	Urban	YES	Medium	6.Env.Edu.	5
47	Young	Man	Urban	YES	Medium	6.Env.Edu.	5
48	MiddleAged	Man	Rural	NO	Medium	6.Env.Edu.	5
49	Senior	Woman	Urban	NO	Medium	6.Env.Edu.	5
54	MiddleAged	Woman	Urban	NO	Medium	6.Env.Edu.	4
55	MiddleAged	Man	Urban	NO	Medium	6.Env.Edu.	5
57	MiddleAged	Man	Rural	NO	Medium	6.Env.Edu.	5
60	Senior	Woman	Urban	NO	Medium	6.Env.Edu.	3
64	MiddleAged	Woman	Rural	YES	Medium	6.Env.Edu.	3
65	MiddleAged	Woman	Urban	NO	Medium	6.Env.Edu.	4
68	MiddleAged	Woman	Urban	NO	Medium	6.Env.Edu.	4
70	MiddleAged	Woman	Urban	NO	Medium	6.Env.Edu.	5
73	MiddleAged	Man	Urban	YES	Medium	6.Env.Edu.	5
74	MiddleAged	Woman	Urban	YES	Medium	6.Env.Edu.	2
75	Young	Woman	Urban	NO	Medium	6.Env.Edu.	4
76	MiddleAged	Woman	Urban	NO	Medium	6.Env.Edu.	3
78	MiddleAged	Woman	Urban	NO	Medium	6.Env.Edu.	4
79	MiddleAged	Man	Urban	NO	Medium	6.Env.Edu.	4
82	MiddleAged	Man	Urban	YES	Medium	6.Env.Edu.	4
84	Senior	Man	Urban	NO	Medium	6.Env.Edu.	5
89	Young	Woman	Rural	NO	Medium	6.Env.Edu.	3
90	MiddleAged	Woman	Urban	NO	Medium	6.Env.Edu.	4
92	MiddleAged	Man	Urban	YES	Medium	6.Env.Edu.	5
95	Young	Woman	Urban	NO	Medium	6.Env.Edu.	5
96	MiddleAged	Woman	Urban	NO	Medium	6.Env.Edu.	5
98	Young	Man	Urban	NO	Medium	6.Env.Edu.	2
100	MiddleAged	Man	Urban	NO	Medium	6.Env.Edu.	4
101	Senior	Man	Rural	NO	Medium	6.Env.Edu.	3
102	Senior	Woman	Urban	YES	Medium	6.Env.Edu.	3
103	Young	Woman	Urban	YES	Medium	6.Env.Edu.	4
105	Senior	Woman	Rural	YES	Medium	6.Env.Edu.	5
106	MiddleAged	Man	Urban	NO	Medium	6.Env.Edu.	3
111	MiddleAged	Woman	Rural	YES	Medium	6.Env.Edu.	5
113	Senior	Woman	Urban	NO	Medium	6.Env.Edu.	4
114	Young	Woman	Urban	NO	Medium	6.Env.Edu.	5
117	MiddleAged	Man	Urban	NO	Medium	6.Env.Edu.	3
119	MiddleAged	Woman	Urban	NO	Medium	6.Env.Edu.	5
121	MiddleAged	Woman	Urban	NO	Medium	6.Env.Edu.	5
123	Young	Man	Urban	YES	Medium	6.Env.Edu.	4
124	MiddleAged	Woman	Urban	NO	Medium	6.Env.Edu.	4
126	MiddleAged	Man	Urban	YES	Medium	6.Env.Edu.	3
127	Senior	Woman	Rural	YES	Medium	6.Env.Edu.	3
130	Young	Woman	Urban	YES	Medium	6.Env.Edu.	5
132	Young	Man	Urban	YES	Medium	6.Env.Edu.	5
134	MiddleAged	Woman	Urban	YES	Medium	6.Env.Edu.	3
135	Senior	Man	Urban	YES	Medium	6.Env.Edu.	5
138	Senior	Woman	Rural	YES	Medium	6.Env.Edu.	5
139	Senior	Man	Urban	NO	Medium	6.Env.Edu.	4
140	MiddleAged	Man	Rural	YES	Medium	6.Env.Edu.	5
143	MiddleAged	Man	Urban	NO	Medium	6.Env.Edu.	4
146	MiddleAged	Woman	Urban	NO	Medium	6.Env.Edu.	5
149	MiddleAged	Woman	Urban	NO	Medium	6.Env.Edu.	5
151	MiddleAged	Woman	Urban	NO	Medium	6.Env.Edu.	4
155	MiddleAged	Man	Urban	YES	Medium	6.Env.Edu.	3
157	MiddleAged	Woman	Urban	YES	Medium	6.Env.Edu.	3
159	MiddleAged	Woman	Urban	NO	Medium	6.Env.Edu.	4
160	MiddleAged	Man	Urban	NO	Medium	6.Env.Edu.	4
161	MiddleAged	Woman	Rural	YES	Medium	6.Env.Edu.	5
162	MiddleAged	Woman	Urban	NO	Medium	6.Env.Edu.	5
163	Senior	Woman	Urban	NO	Medium	6.Env.Edu.	5
168	MiddleAged	Woman	Urban	NO	Medium	6.Env.Edu.	4
169	MiddleAged	Woman	Urban	NO	Medium	6.Env.Edu.	4
170	MiddleAged	Woman	Urban	YES	Medium	6.Env.Edu.	4
172	MiddleAged	Woman	Urban	YES	Medium	6.Env.Edu.	4
175	MiddleAged	Woman	Urban	NO	Medium	6.Env.Edu.	4
177	MiddleAged	Man	Urban	NO	Medium	6.Env.Edu.	4
181	Senior	Man	Urban	NO	Medium	6.Env.Edu.	5
182	MiddleAged	Man	Urban	NO	Medium	6.Env.Edu.	4
184	MiddleAged	Man	Urban	NO	Medium	6.Env.Edu.	3
186	MiddleAged	Woman	Rural	YES	Medium	6.Env.Edu.	2
187	Senior	Woman	Urban	NO	Medium	6.Env.Edu.	4
188	MiddleAged	Man	Urban	YES	Medium	6.Env.Edu.	3
191	MiddleAged	Woman	Urban	YES	Medium	6.Env.Edu.	4
192	Young	Man	Urban	YES	Medium	6.Env.Edu.	4
195	MiddleAged	Woman	Urban	NO	Medium	6.Env.Edu.	2
197	MiddleAged	Man	Rural	YES	Medium	6.Env.Edu.	4
198	MiddleAged	Man	Urban	YES	Medium	6.Env.Edu.	4
199	Young	Woman	Rural	YES	Medium	6.Env.Edu.	2
201	Senior	Woman	Urban	YES	Medium	6.Env.Edu.	2
203	Senior	Man	Rural	YES	Medium	6.Env.Edu.	5
204	MiddleAged	Woman	Rural	YES	Medium	6.Env.Edu.	4
205	Young	Man	Urban	NO	Medium	6.Env.Edu.	5
206	MiddleAged	Woman	Urban	NO	Medium	6.Env.Edu.	3
209	Senior	Man	Rural	YES	Medium	6.Env.Edu.	2
212	MiddleAged	Woman	Urban	NO	Medium	6.Env.Edu.	5
214	MiddleAged	Man	Urban	NO	Medium	6.Env.Edu.	3
216	MiddleAged	Woman	Urban	NO	Medium	6.Env.Edu.	4
217	MiddleAged	Man	Urban	YES	Medium	6.Env.Edu.	4
218	MiddleAged	Woman	Rural	YES	Medium	6.Env.Edu.	4
220	Senior	Woman	Rural	YES	Medium	6.Env.Edu.	5
223	MiddleAged	Man	Urban	NO	Medium	6.Env.Edu.	5
226	Young	Man	Urban	YES	Medium	6.Env.Edu.	5
227	Senior	Woman	Rural	YES	Medium	6.Env.Edu.	5
230	MiddleAged	Woman	Urban	NO	Medium	6.Env.Edu.	3
232	Young	Man	Urban	YES	Medium	6.Env.Edu.	4
236	MiddleAged	Man	Urban	NO	Medium	6.Env.Edu.	4
237	MiddleAged	Woman	Urban	NO	Medium	6.Env.Edu.	3
239	MiddleAged	Man	Urban	NO	Medium	6.Env.Edu.	3
244	Young	Man	Urban	NO	Medium	6.Env.Edu.	3
245	MiddleAged	Woman	Urban	YES	Medium	6.Env.Edu.	5
246	Senior	Woman	Rural	NO	Medium	6.Env.Edu.	2
249	MiddleAged	Man	Urban	YES	Medium	6.Env.Edu.	4
250	MiddleAged	Man	Urban	NO	Medium	6.Env.Edu.	4
251	MiddleAged	Woman	Urban	NO	Medium	6.Env.Edu.	3
252	Senior	Woman	Urban	YES	Medium	6.Env.Edu.	4
254	MiddleAged	Woman	Urban	NO	Medium	6.Env.Edu.	3
255	MiddleAged	Man	Urban	YES	Medium	6.Env.Edu.	4
257	MiddleAged	Woman	Urban	NO	Medium	6.Env.Edu.	3
264	MiddleAged	Man	Urban	NO	Medium	6.Env.Edu.	4
267	MiddleAged	Man	Urban	NO	Medium	6.Env.Edu.	2
270	Young	Woman	Urban	NO	Medium	6.Env.Edu.	4
274	MiddleAged	Man	Urban	NO	Medium	6.Env.Edu.	4
277	Senior	Man	Rural	YES	Medium	6.Env.Edu.	5
279	Young	Woman	Urban	YES	Medium	6.Env.Edu.	5
280	Young	Woman	Urban	YES	Medium	6.Env.Edu.	4
283	Young	Woman	Urban	YES	Medium	6.Env.Edu.	4
284	MiddleAged	Woman	Urban	NO	Medium	6.Env.Edu.	4
285	MiddleAged	Woman	Rural	YES	Medium	6.Env.Edu.	4
290	Young	Man	Urban	YES	Medium	6.Env.Edu.	4
291	MiddleAged	Man	Urban	NO	Medium	6.Env.Edu.	2
295	Senior	Woman	Urban	YES	Medium	6.Env.Edu.	5
296	Senior	Woman	Rural	YES	Medium	6.Env.Edu.	4
297	MiddleAged	Man	Urban	YES	Medium	6.Env.Edu.	2
298	Young	Man	Urban	NO	Medium	6.Env.Edu.	4
301	MiddleAged	Man	Urban	NO	Medium	6.Env.Edu.	5
302	MiddleAged	Woman	Urban	YES	Medium	6.Env.Edu.	4
305	MiddleAged	Woman	Rural	YES	Medium	6.Env.Edu.	4
306	Senior	Man	Rural	YES	Medium	6.Env.Edu.	4
309	MiddleAged	Man	Rural	YES	Medium	6.Env.Edu.	2
310	MiddleAged	Woman	Rural	YES	Medium	6.Env.Edu.	5
311	Young	Woman	Rural	YES	Medium	6.Env.Edu.	4
313	MiddleAged	Man	Urban	NO	Medium	6.Env.Edu.	3
315	MiddleAged	Man	Urban	NO	Medium	6.Env.Edu.	3
317	Senior	Woman	Urban	NO	Medium	6.Env.Edu.	5
318	MiddleAged	Woman	Urban	YES	Medium	6.Env.Edu.	4
320	MiddleAged	Woman	Rural	YES	Medium	6.Env.Edu.	5
321	Senior	Man	Urban	NO	Medium	6.Env.Edu.	5
322	Senior	Woman	Rural	NO	Medium	6.Env.Edu.	3
325	MiddleAged	Man	Urban	NO	Medium	6.Env.Edu.	5
328	MiddleAged	Woman	Urban	YES	Medium	6.Env.Edu.	4
330	MiddleAged	Woman	Urban	NO	Medium	6.Env.Edu.	4
333	MiddleAged	Woman	Urban	NO	Medium	6.Env.Edu.	5
335	MiddleAged	Woman	Rural	YES	Medium	6.Env.Edu.	5
336	MiddleAged	Woman	Urban	YES	Medium	6.Env.Edu.	5
337	MiddleAged	Woman	Urban	NO	Medium	6.Env.Edu.	3
340	MiddleAged	Woman	Urban	NO	Medium	6.Env.Edu.	2
343	Senior	Woman	Rural	YES	Medium	6.Env.Edu.	5
344	MiddleAged	Woman	Urban	NO	Medium	6.Env.Edu.	5
4	MiddleAged	Man	Rural	YES	High	6.PreventEconBenef	5
10	Young	Man	Urban	YES	High	6.PreventEconBenef	5
16	Young	Woman	Urban	YES	High	6.PreventEconBenef	5
19	Young	Woman	Rural	YES	High	6.PreventEconBenef	5
21	MiddleAged	Man	Urban	NO	High	6.PreventEconBenef	4
27	Young	Man	Urban	YES	High	6.PreventEconBenef	5
29	Young	Woman	Rural	YES	High	6.PreventEconBenef	5
38	Young	Woman	Urban	YES	High	6.PreventEconBenef	5
40	Young	Woman	Urban	YES	High	6.PreventEconBenef	5
41	Young	Woman	Urban	YES	High	6.PreventEconBenef	5
53	Senior	Woman	Rural	YES	High	6.PreventEconBenef	5
56	Young	Man	Rural	YES	High	6.PreventEconBenef	4
63	MiddleAged	Man	Urban	YES	High	6.PreventEconBenef	5
66	MiddleAged	Woman	Urban	NO	High	6.PreventEconBenef	5
72	Young	Man	Urban	NO	High	6.PreventEconBenef	5
83	Young	Woman	Urban	YES	High	6.PreventEconBenef	5
85	Young	Woman	Urban	YES	High	6.PreventEconBenef	5
86	Senior	Man	Urban	NO	High	6.PreventEconBenef	3
88	MiddleAged	Woman	Urban	YES	High	6.PreventEconBenef	5
97	Young	Woman	Urban	YES	High	6.PreventEconBenef	4
104	MiddleAged	Man	Urban	YES	High	6.PreventEconBenef	5
107	MiddleAged	Man	Rural	YES	High	6.PreventEconBenef	5
108	Young	Man	Urban	YES	High	6.PreventEconBenef	5
110	MiddleAged	Woman	Urban	YES	High	6.PreventEconBenef	5
115	MiddleAged	Woman	Urban	NO	High	6.PreventEconBenef	4
116	Young	Man	Urban	YES	High	6.PreventEconBenef	5
118	MiddleAged	Man	Urban	NO	High	6.PreventEconBenef	5
125	Young	Woman	Urban	YES	High	6.PreventEconBenef	5
128	MiddleAged	Man	Urban	NO	High	6.PreventEconBenef	5
129	MiddleAged	Man	Urban	NO	High	6.PreventEconBenef	5
136	Young	Woman	Urban	YES	High	6.PreventEconBenef	5
137	MiddleAged	Woman	Urban	YES	High	6.PreventEconBenef	5
141	MiddleAged	Woman	Urban	NO	High	6.PreventEconBenef	5
142	Young	Woman	Urban	NO	High	6.PreventEconBenef	5
144	MiddleAged	Man	Rural	YES	High	6.PreventEconBenef	5
145	Young	Woman	Urban	YES	High	6.PreventEconBenef	5
147	MiddleAged	Man	Urban	NO	High	6.PreventEconBenef	5
150	MiddleAged	Woman	Urban	NO	High	6.PreventEconBenef	5
152	Young	Man	Urban	YES	High	6.PreventEconBenef	5
156	Young	Man	Urban	YES	High	6.PreventEconBenef	5
167	Young	Man	Urban	NO	High	6.PreventEconBenef	5
179	Young	Woman	Urban	YES	High	6.PreventEconBenef	5
185	Young	Man	Urban	NO	High	6.PreventEconBenef	5
189	MiddleAged	Man	Urban	YES	High	6.PreventEconBenef	4
190	Young	Woman	Urban	YES	High	6.PreventEconBenef	3
196	MiddleAged	Woman	Urban	YES	High	6.PreventEconBenef	5
202	Young	Woman	Urban	YES	High	6.PreventEconBenef	5
208	MiddleAged	Man	Urban	YES	High	6.PreventEconBenef	5
210	MiddleAged	Man	Urban	YES	High	6.PreventEconBenef	5
211	MiddleAged	Woman	Urban	YES	High	6.PreventEconBenef	3
221	MiddleAged	Woman	Urban	YES	High	6.PreventEconBenef	5
222	MiddleAged	Woman	Urban	NO	High	6.PreventEconBenef	5
225	Young	Man	Urban	YES	High	6.PreventEconBenef	3
231	Young	Woman	Urban	YES	High	6.PreventEconBenef	5
234	Young	Woman	Urban	YES	High	6.PreventEconBenef	5
235	Young	Woman	Urban	NO	High	6.PreventEconBenef	4
238	MiddleAged	Woman	Urban	NO	High	6.PreventEconBenef	5
243	Young	Man	Urban	YES	High	6.PreventEconBenef	5
247	MiddleAged	Woman	Urban	NO	High	6.PreventEconBenef	5
248	Young	Woman	Urban	YES	High	6.PreventEconBenef	5
259	Young	Man	Urban	YES	High	6.PreventEconBenef	5
261	Young	Woman	Urban	NO	High	6.PreventEconBenef	5
268	Young	Woman	Urban	YES	High	6.PreventEconBenef	5
269	Senior	Woman	Urban	YES	High	6.PreventEconBenef	5
272	Senior	Woman	Urban	YES	High	6.PreventEconBenef	5
273	Young	Woman	Urban	NO	High	6.PreventEconBenef	5
278	Young	Woman	Urban	YES	High	6.PreventEconBenef	5
282	Young	Man	Urban	YES	High	6.PreventEconBenef	5
288	Young	Woman	Urban	NO	High	6.PreventEconBenef	5
299	MiddleAged	Man	Urban	YES	High	6.PreventEconBenef	4
300	MiddleAged	Woman	Urban	YES	High	6.PreventEconBenef	5
308	Young	Man	Urban	YES	High	6.PreventEconBenef	5
314	MiddleAged	Man	Urban	YES	High	6.PreventEconBenef	5
316	Young	Man	Urban	YES	High	6.PreventEconBenef	5
324	Young	Man	Urban	NO	High	6.PreventEconBenef	5
331	Young	Woman	Rural	YES	High	6.PreventEconBenef	5
332	Young	Man	Urban	YES	High	6.PreventEconBenef	5
338	Young	Man	Urban	YES	High	6.PreventEconBenef	5
341	Young	Woman	Urban	YES	High	6.PreventEconBenef	4
342	Young	Man	Urban	YES	High	6.PreventEconBenef	5
345	MiddleAged	Woman	Urban	YES	High	6.PreventEconBenef	5
2	Senior	Woman	Rural	YES	Low	6.PreventEconBenef	5
5	Senior	Woman	Rural	NO	Low	6.PreventEconBenef	4
7	Senior	Woman	Rural	NO	Low	6.PreventEconBenef	4
8	Senior	Man	Urban	NO	Low	6.PreventEconBenef	4
12	Senior	Man	Rural	YES	Low	6.PreventEconBenef	5
13	Senior	Woman	Rural	YES	Low	6.PreventEconBenef	5
22	Senior	Man	Urban	NO	Low	6.PreventEconBenef	4
26	MiddleAged	Woman	Urban	NO	Low	6.PreventEconBenef	4
30	Senior	Woman	Urban	NO	Low	6.PreventEconBenef	5
33	Senior	Man	Rural	NO	Low	6.PreventEconBenef	5
34	Senior	Man	Rural	YES	Low	6.PreventEconBenef	5
44	Senior	Woman	Rural	YES	Low	6.PreventEconBenef	4
45	MiddleAged	Woman	Urban	YES	Low	6.PreventEconBenef	5
50	Senior	Woman	Rural	NO	Low	6.PreventEconBenef	3
[truncated: 1,975 more rows]

## Sheet: Question 7
Survey Number	Age	SEX	Residence	Outdoor Activities	Educational level	Answer
[truncated: 345 more rows]
